# Supplementary material
Source: ML conference proceedings conference paper supplement (https://proceedings.neurips.cc/paper_files/paper/2022/hash/331c41353b053683e17f7c88a797701d-Abstract.html)
Supplement: Supplementary file 1 [file 331c41353b053683e17f7c88a797701d-Supplemental-Conference.zip]

Archive with 696 entries (642 files):
- supp/
- __MACOSX/._supp
- supp/supp.pdf
- __MACOSX/supp/._supp.pdf
- supp/code_release/
- __MACOSX/supp/._code_release
- supp/code_release/prefix_sum/
- __MACOSX/supp/code_release/._prefix_sum
- supp/code_release/.DS_Store
- __MACOSX/supp/code_release/._.DS_Store
- supp/code_release/mazes/
- __MACOSX/supp/code_release/._mazes
- supp/code_release/prefix_sum/.DS_Store
- __MACOSX/supp/code_release/prefix_sum/._.DS_Store
- supp/code_release/prefix_sum/TIL_neurips_release/
- __MACOSX/supp/code_release/prefix_sum/._TIL_neurips_release
- supp/code_release/mazes/.DS_Store
- __MACOSX/supp/code_release/mazes/._.DS_Store
- supp/code_release/mazes/deep-thinking-main/
- __MACOSX/supp/code_release/mazes/._deep-thinking-main
- supp/code_release/prefix_sum/TIL_neurips_release/.DS_Store
- __MACOSX/supp/code_release/prefix_sum/TIL_neurips_release/._.DS_Store
- supp/code_release/prefix_sum/TIL_neurips_release/README.md
- __MACOSX/supp/code_release/prefix_sum/TIL_neurips_release/._README.md
- supp/code_release/prefix_sum/TIL_neurips_release/setup.py
- __MACOSX/supp/code_release/prefix_sum/TIL_neurips_release/._setup.py
- supp/code_release/prefix_sum/TIL_neurips_release/data/
- __MACOSX/supp/code_release/prefix_sum/TIL_neurips_release/._data
- supp/code_release/prefix_sum/TIL_neurips_release/runs/
- __MACOSX/supp/code_release/prefix_sum/TIL_neurips_release/._runs
- supp/code_release/prefix_sum/TIL_neurips_release/src/
- __MACOSX/supp/code_release/prefix_sum/TIL_neurips_release/._src
- supp/code_release/mazes/deep-thinking-main/test_model.py
- __MACOSX/supp/code_release/mazes/deep-thinking-main/._test_model.py
- supp/code_release/mazes/deep-thinking-main/.DS_Store
- __MACOSX/supp/code_release/mazes/deep-thinking-main/._.DS_Store
- supp/code_release/mazes/deep-thinking-main/LICENSE
- __MACOSX/supp/code_release/mazes/deep-thinking-main/._LICENSE
- supp/code_release/mazes/deep-thinking-main/requirements.txt
- __MACOSX/supp/code_release/mazes/deep-thinking-main/._requirements.txt
- supp/code_release/mazes/deep-thinking-main/train_model.py
- __MACOSX/supp/code_release/mazes/deep-thinking-main/._train_model.py
- supp/code_release/mazes/deep-thinking-main/config/
- __MACOSX/supp/code_release/mazes/deep-thinking-main/._config
- supp/code_release/mazes/deep-thinking-main/launch/
- __MACOSX/supp/code_release/mazes/deep-thinking-main/._launch
- supp/code_release/mazes/deep-thinking-main/test_deq.py
- __MACOSX/supp/code_release/mazes/deep-thinking-main/._test_deq.py
- supp/code_release/mazes/deep-thinking-main/README.md
- __MACOSX/supp/code_release/mazes/deep-thinking-main/._README.md
- supp/code_release/mazes/deep-thinking-main/train_deq.py
- __MACOSX/supp/code_release/mazes/deep-thinking-main/._train_deq.py
- supp/code_release/mazes/deep-thinking-main/deepthinking/
- __MACOSX/supp/code_release/mazes/deep-thinking-main/._deepthinking
- supp/code_release/prefix_sum/TIL_neurips_release/data/.DS_Store
- __MACOSX/supp/code_release/prefix_sum/TIL_neurips_release/data/._.DS_Store
- supp/code_release/prefix_sum/TIL_neurips_release/data/prefix_sums_data/
- __MACOSX/supp/code_release/prefix_sum/TIL_neurips_release/data/._prefix_sums_data
- supp/code_release/prefix_sum/TIL_neurips_release/runs/.DS_Store
- __MACOSX/supp/code_release/prefix_sum/TIL_neurips_release/runs/._.DS_Store
- supp/code_release/prefix_sum/TIL_neurips_release/runs/dev/
- __MACOSX/supp/code_release/prefix_sum/TIL_neurips_release/runs/._dev
- supp/code_release/prefix_sum/TIL_neurips_release/src/.DS_Store
- __MACOSX/supp/code_release/prefix_sum/TIL_neurips_release/src/._.DS_Store
- supp/code_release/prefix_sum/TIL_neurips_release/src/analysis/
- __MACOSX/supp/code_release/prefix_sum/TIL_neurips_release/src/._analysis
- supp/code_release/prefix_sum/TIL_neurips_release/src/__init__.py
- __MACOSX/supp/code_release/prefix_sum/TIL_neurips_release/src/.___init__.py
- supp/code_release/prefix_sum/TIL_neurips_release/src/utils/
- __MACOSX/supp/code_release/prefix_sum/TIL_neurips_release/src/._utils
- supp/code_release/prefix_sum/TIL_neurips_release/src/learners/
- __MACOSX/supp/code_release/prefix_sum/TIL_neurips_release/src/._learners
- supp/code_release/prefix_sum/TIL_neurips_release/src/registry/
- __MACOSX/supp/code_release/prefix_sum/TIL_neurips_release/src/._registry
- supp/code_release/prefix_sum/TIL_neurips_release/src/dl/
- __MACOSX/supp/code_release/prefix_sum/TIL_neurips_release/src/._dl
- supp/code_release/prefix_sum/TIL_neurips_release/src/mains/
- __MACOSX/supp/code_release/prefix_sum/TIL_neurips_release/src/._mains
- supp/code_release/prefix_sum/TIL_neurips_release/src/data/
- __MACOSX/supp/code_release/prefix_sum/TIL_neurips_release/src/._data
- supp/code_release/mazes/deep-thinking-main/config/test_model_config.yaml
- __MACOSX/supp/code_release/mazes/deep-thinking-main/config/._test_model_config.yaml
- supp/code_release/mazes/deep-thinking-main/config/.DS_Store
- __MACOSX/supp/code_release/mazes/deep-thinking-main/config/._.DS_Store
- supp/code_release/mazes/deep-thinking-main/config/problem/
- __MACOSX/supp/code_release/mazes/deep-thinking-main/config/._problem
- supp/code_release/mazes/deep-thinking-main/config/train_model_config.yaml
- __MACOSX/supp/code_release/mazes/deep-thinking-main/config/._train_model_config.yaml
- supp/code_release/mazes/deep-thinking-main/config/train_deq_config.yaml
- __MACOSX/supp/code_release/mazes/deep-thinking-main/config/._train_deq_config.yaml
- supp/code_release/mazes/deep-thinking-main/config/hydra/
- __MACOSX/supp/code_release/mazes/deep-thinking-main/config/._hydra
- supp/code_release/mazes/deep-thinking-main/launch/test_deq_v3.sh
- __MACOSX/supp/code_release/mazes/deep-thinking-main/launch/._test_deq_v3.sh
- supp/code_release/mazes/deep-thinking-main/launch/train_deq_v3.sh
- __MACOSX/supp/code_release/mazes/deep-thinking-main/launch/._train_deq_v3.sh
- supp/code_release/mazes/deep-thinking-main/launch/mazes_experiments.sh
- __MACOSX/supp/code_release/mazes/deep-thinking-main/launch/._mazes_experiments.sh
- supp/code_release/mazes/deep-thinking-main/deepthinking/data_analysis/
- __MACOSX/supp/code_release/mazes/deep-thinking-main/deepthinking/._data_analysis
- supp/code_release/mazes/deep-thinking-main/deepthinking/.DS_Store
- __MACOSX/supp/code_release/mazes/deep-thinking-main/deepthinking/._.DS_Store
- supp/code_release/mazes/deep-thinking-main/deepthinking/__init__.py
- __MACOSX/supp/code_release/mazes/deep-thinking-main/deepthinking/.___init__.py
- supp/code_release/mazes/deep-thinking-main/deepthinking/utils/
- __MACOSX/supp/code_release/mazes/deep-thinking-main/deepthinking/._utils
- supp/code_release/mazes/deep-thinking-main/deepthinking/models/
- __MACOSX/supp/code_release/mazes/deep-thinking-main/deepthinking/._models
- supp/code_release/mazes/deep-thinking-main/deepthinking/names.py
- __MACOSX/supp/code_release/mazes/deep-thinking-main/deepthinking/._names.py
- supp/code_release/mazes/deep-thinking-main/deepthinking/adjectives.py
- __MACOSX/supp/code_release/mazes/deep-thinking-main/deepthinking/._adjectives.py
- supp/code_release/mazes/deep-thinking-main/deepthinking/lib/
- __MACOSX/supp/code_release/mazes/deep-thinking-main/deepthinking/._lib
- supp/code_release/prefix_sum/TIL_neurips_release/data/prefix_sums_data/19_targets.pth
- __MACOSX/supp/code_release/prefix_sum/TIL_neurips_release/data/prefix_sums_data/._19_targets.pth
- supp/code_release/prefix_sum/TIL_neurips_release/data/prefix_sums_data/128_data.pth
- __MACOSX/supp/code_release/prefix_sum/TIL_neurips_release/data/prefix_sums_data/._128_data.pth
- supp/code_release/prefix_sum/TIL_neurips_release/data/prefix_sums_data/47_targets.pth
- __MACOSX/supp/code_release/prefix_sum/TIL_neurips_release/data/prefix_sums_data/._47_targets.pth
- supp/code_release/prefix_sum/TIL_neurips_release/data/prefix_sums_data/512_targets.pth
- __MACOSX/supp/code_release/prefix_sum/TIL_neurips_release/data/prefix_sums_data/._512_targets.pth
- supp/code_release/prefix_sum/TIL_neurips_release/data/prefix_sums_data/37_targets.pth
- __MACOSX/supp/code_release/prefix_sum/TIL_neurips_release/data/prefix_sums_data/._37_targets.pth
- supp/code_release/prefix_sum/TIL_neurips_release/data/prefix_sums_data/37_data.pth
- __MACOSX/supp/code_release/prefix_sum/TIL_neurips_release/data/prefix_sums_data/._37_data.pth
- supp/code_release/prefix_sum/TIL_neurips_release/data/prefix_sums_data/36_data.pth
- __MACOSX/supp/code_release/prefix_sum/TIL_neurips_release/data/prefix_sums_data/._36_data.pth
- supp/code_release/prefix_sum/TIL_neurips_release/data/prefix_sums_data/2048_data.pth
- __MACOSX/supp/code_release/prefix_sum/TIL_neurips_release/data/prefix_sums_data/._2048_data.pth
- supp/code_release/prefix_sum/TIL_neurips_release/data/prefix_sums_data/60_targets.pth
- __MACOSX/supp/code_release/prefix_sum/TIL_neurips_release/data/prefix_sums_data/._60_targets.pth
- supp/code_release/prefix_sum/TIL_neurips_release/data/prefix_sums_data/52_targets.pth
- __MACOSX/supp/code_release/prefix_sum/TIL_neurips_release/data/prefix_sums_data/._52_targets.pth
- supp/code_release/prefix_sum/TIL_neurips_release/data/prefix_sums_data/22_targets.pth
- __MACOSX/supp/code_release/prefix_sum/TIL_neurips_release/data/prefix_sums_data/._22_targets.pth
- supp/code_release/prefix_sum/TIL_neurips_release/data/prefix_sums_data/40_data.pth
- __MACOSX/supp/code_release/prefix_sum/TIL_neurips_release/data/prefix_sums_data/._40_data.pth
- supp/code_release/prefix_sum/TIL_neurips_release/data/prefix_sums_data/41_data.pth
- __MACOSX/supp/code_release/prefix_sum/TIL_neurips_release/data/prefix_sums_data/._41_data.pth
- supp/code_release/prefix_sum/TIL_neurips_release/data/prefix_sums_data/63_data.pth
- __MACOSX/supp/code_release/prefix_sum/TIL_neurips_release/data/prefix_sums_data/._63_data.pth
- supp/code_release/prefix_sum/TIL_neurips_release/data/prefix_sums_data/62_data.pth
- __MACOSX/supp/code_release/prefix_sum/TIL_neurips_release/data/prefix_sums_data/._62_data.pth
- supp/code_release/prefix_sum/TIL_neurips_release/data/prefix_sums_data/14_data.pth
- __MACOSX/supp/code_release/prefix_sum/TIL_neurips_release/data/prefix_sums_data/._14_data.pth
- supp/code_release/prefix_sum/TIL_neurips_release/data/prefix_sums_data/27_targets.pth
- __MACOSX/supp/code_release/prefix_sum/TIL_neurips_release/data/prefix_sums_data/._27_targets.pth
- supp/code_release/prefix_sum/TIL_neurips_release/data/prefix_sums_data/57_targets.pth
- __MACOSX/supp/code_release/prefix_sum/TIL_neurips_release/data/prefix_sums_data/._57_targets.pth
- supp/code_release/prefix_sum/TIL_neurips_release/data/prefix_sums_data/32_targets.pth
- __MACOSX/supp/code_release/prefix_sum/TIL_neurips_release/data/prefix_sums_data/._32_targets.pth
- supp/code_release/prefix_sum/TIL_neurips_release/data/prefix_sums_data/1024_data.pth
- __MACOSX/supp/code_release/prefix_sum/TIL_neurips_release/data/prefix_sums_data/._1024_data.pth
- supp/code_release/prefix_sum/TIL_neurips_release/data/prefix_sums_data/42_targets.pth
- __MACOSX/supp/code_release/prefix_sum/TIL_neurips_release/data/prefix_sums_data/._42_targets.pth
- supp/code_release/prefix_sum/TIL_neurips_release/data/prefix_sums_data/20_data.pth
- __MACOSX/supp/code_release/prefix_sum/TIL_neurips_release/data/prefix_sums_data/._20_data.pth
- supp/code_release/prefix_sum/TIL_neurips_release/data/prefix_sums_data/21_data.pth
- __MACOSX/supp/code_release/prefix_sum/TIL_neurips_release/data/prefix_sums_data/._21_data.pth
- supp/code_release/prefix_sum/TIL_neurips_release/data/prefix_sums_data/57_data.pth
- __MACOSX/supp/code_release/prefix_sum/TIL_neurips_release/data/prefix_sums_data/._57_data.pth
- supp/code_release/prefix_sum/TIL_neurips_release/data/prefix_sums_data/56_data.pth
- __MACOSX/supp/code_release/prefix_sum/TIL_neurips_release/data/prefix_sums_data/._56_data.pth
- supp/code_release/prefix_sum/TIL_neurips_release/data/prefix_sums_data/256_data.pth
- __MACOSX/supp/code_release/prefix_sum/TIL_neurips_release/data/prefix_sums_data/._256_data.pth
- supp/code_release/prefix_sum/TIL_neurips_release/data/prefix_sums_data/64_data.pth
- __MACOSX/supp/code_release/prefix_sum/TIL_neurips_release/data/prefix_sums_data/._64_data.pth
- supp/code_release/prefix_sum/TIL_neurips_release/data/prefix_sums_data/512_data.pth
- __MACOSX/supp/code_release/prefix_sum/TIL_neurips_release/data/prefix_sums_data/._512_data.pth
- supp/code_release/prefix_sum/TIL_neurips_release/data/prefix_sums_data/12_data.pth
- __MACOSX/supp/code_release/prefix_sum/TIL_neurips_release/data/prefix_sums_data/._12_data.pth
- supp/code_release/prefix_sum/TIL_neurips_release/data/prefix_sums_data/31_targets.pth
- __MACOSX/supp/code_release/prefix_sum/TIL_neurips_release/data/prefix_sums_data/._31_targets.pth
- supp/code_release/prefix_sum/TIL_neurips_release/data/prefix_sums_data/41_targets.pth
- __MACOSX/supp/code_release/prefix_sum/TIL_neurips_release/data/prefix_sums_data/._41_targets.pth
- supp/code_release/prefix_sum/TIL_neurips_release/data/prefix_sums_data/24_targets.pth
- __MACOSX/supp/code_release/prefix_sum/TIL_neurips_release/data/prefix_sums_data/._24_targets.pth
- supp/code_release/prefix_sum/TIL_neurips_release/data/prefix_sums_data/54_targets.pth
- __MACOSX/supp/code_release/prefix_sum/TIL_neurips_release/data/prefix_sums_data/._54_targets.pth
- supp/code_release/prefix_sum/TIL_neurips_release/data/prefix_sums_data/4096_targets.pth
- __MACOSX/supp/code_release/prefix_sum/TIL_neurips_release/data/prefix_sums_data/._4096_targets.pth
- supp/code_release/prefix_sum/TIL_neurips_release/data/prefix_sums_data/27_data.pth
- __MACOSX/supp/code_release/prefix_sum/TIL_neurips_release/data/prefix_sums_data/._27_data.pth
- supp/code_release/prefix_sum/TIL_neurips_release/data/prefix_sums_data/26_data.pth
- __MACOSX/supp/code_release/prefix_sum/TIL_neurips_release/data/prefix_sums_data/._26_data.pth
- supp/code_release/prefix_sum/TIL_neurips_release/data/prefix_sums_data/50_data.pth
- __MACOSX/supp/code_release/prefix_sum/TIL_neurips_release/data/prefix_sums_data/._50_data.pth
- supp/code_release/prefix_sum/TIL_neurips_release/data/prefix_sums_data/51_data.pth
- __MACOSX/supp/code_release/prefix_sum/TIL_neurips_release/data/prefix_sums_data/._51_data.pth
- supp/code_release/prefix_sum/TIL_neurips_release/data/prefix_sums_data/16_targets.pth
- __MACOSX/supp/code_release/prefix_sum/TIL_neurips_release/data/prefix_sums_data/._16_targets.pth
- supp/code_release/prefix_sum/TIL_neurips_release/data/prefix_sums_data/48_targets.pth
- __MACOSX/supp/code_release/prefix_sum/TIL_neurips_release/data/prefix_sums_data/._48_targets.pth
- supp/code_release/prefix_sum/TIL_neurips_release/data/prefix_sums_data/19_data.pth
- __MACOSX/supp/code_release/prefix_sum/TIL_neurips_release/data/prefix_sums_data/._19_data.pth
- supp/code_release/prefix_sum/TIL_neurips_release/data/prefix_sums_data/18_data.pth
- __MACOSX/supp/code_release/prefix_sum/TIL_neurips_release/data/prefix_sums_data/._18_data.pth
- supp/code_release/prefix_sum/TIL_neurips_release/data/prefix_sums_data/38_targets.pth
- __MACOSX/supp/code_release/prefix_sum/TIL_neurips_release/data/prefix_sums_data/._38_targets.pth
- supp/code_release/prefix_sum/TIL_neurips_release/data/prefix_sums_data/72_data.pth
- __MACOSX/supp/code_release/prefix_sum/TIL_neurips_release/data/prefix_sums_data/._72_data.pth
- supp/code_release/prefix_sum/TIL_neurips_release/data/prefix_sums_data/51_targets.pth
- __MACOSX/supp/code_release/prefix_sum/TIL_neurips_release/data/prefix_sums_data/._51_targets.pth
- supp/code_release/prefix_sum/TIL_neurips_release/data/prefix_sums_data/21_targets.pth
- __MACOSX/supp/code_release/prefix_sum/TIL_neurips_release/data/prefix_sums_data/._21_targets.pth
- supp/code_release/prefix_sum/TIL_neurips_release/data/prefix_sums_data/63_targets.pth
- __MACOSX/supp/code_release/prefix_sum/TIL_neurips_release/data/prefix_sums_data/._63_targets.pth
- supp/code_release/prefix_sum/TIL_neurips_release/data/prefix_sums_data/3072_data.pth
- __MACOSX/supp/code_release/prefix_sum/TIL_neurips_release/data/prefix_sums_data/._3072_data.pth
- supp/code_release/prefix_sum/TIL_neurips_release/data/prefix_sums_data/30_data.pth
- __MACOSX/supp/code_release/prefix_sum/TIL_neurips_release/data/prefix_sums_data/._30_data.pth
- supp/code_release/prefix_sum/TIL_neurips_release/data/prefix_sums_data/31_data.pth
- __MACOSX/supp/code_release/prefix_sum/TIL_neurips_release/data/prefix_sums_data/._31_data.pth
- supp/code_release/prefix_sum/TIL_neurips_release/data/prefix_sums_data/28_targets.pth
- __MACOSX/supp/code_release/prefix_sum/TIL_neurips_release/data/prefix_sums_data/._28_targets.pth
- supp/code_release/prefix_sum/TIL_neurips_release/data/prefix_sums_data/58_targets.pth
- __MACOSX/supp/code_release/prefix_sum/TIL_neurips_release/data/prefix_sums_data/._58_targets.pth
- supp/code_release/prefix_sum/TIL_neurips_release/data/prefix_sums_data/44_targets.pth
- __MACOSX/supp/code_release/prefix_sum/TIL_neurips_release/data/prefix_sums_data/._44_targets.pth
- supp/code_release/prefix_sum/TIL_neurips_release/data/prefix_sums_data/3072_targets.pth
- __MACOSX/supp/code_release/prefix_sum/TIL_neurips_release/data/prefix_sums_data/._3072_targets.pth
- supp/code_release/prefix_sum/TIL_neurips_release/data/prefix_sums_data/34_targets.pth
- __MACOSX/supp/code_release/prefix_sum/TIL_neurips_release/data/prefix_sums_data/._34_targets.pth
- supp/code_release/prefix_sum/TIL_neurips_release/data/prefix_sums_data/47_data.pth
- __MACOSX/supp/code_release/prefix_sum/TIL_neurips_release/data/prefix_sums_data/._47_data.pth
- supp/code_release/prefix_sum/TIL_neurips_release/data/prefix_sums_data/46_data.pth
- __MACOSX/supp/code_release/prefix_sum/TIL_neurips_release/data/prefix_sums_data/._46_data.pth
- supp/code_release/prefix_sum/TIL_neurips_release/data/prefix_sums_data/256_targets.pth
- __MACOSX/supp/code_release/prefix_sum/TIL_neurips_release/data/prefix_sums_data/._256_targets.pth
- supp/code_release/prefix_sum/TIL_neurips_release/data/prefix_sums_data/23_data.pth
- __MACOSX/supp/code_release/prefix_sum/TIL_neurips_release/data/prefix_sums_data/._23_data.pth
- supp/code_release/prefix_sum/TIL_neurips_release/data/prefix_sums_data/22_data.pth
- __MACOSX/supp/code_release/prefix_sum/TIL_neurips_release/data/prefix_sums_data/._22_data.pth
- supp/code_release/prefix_sum/TIL_neurips_release/data/prefix_sums_data/43_targets.pth
- __MACOSX/supp/code_release/prefix_sum/TIL_neurips_release/data/prefix_sums_data/._43_targets.pth
- supp/code_release/prefix_sum/TIL_neurips_release/data/prefix_sums_data/33_targets.pth
- __MACOSX/supp/code_release/prefix_sum/TIL_neurips_release/data/prefix_sums_data/._33_targets.pth
- supp/code_release/prefix_sum/TIL_neurips_release/data/prefix_sums_data/54_data.pth
- __MACOSX/supp/code_release/prefix_sum/TIL_neurips_release/data/prefix_sums_data/._54_data.pth
- supp/code_release/prefix_sum/TIL_neurips_release/data/prefix_sums_data/55_data.pth
- __MACOSX/supp/code_release/prefix_sum/TIL_neurips_release/data/prefix_sums_data/._55_data.pth
- supp/code_release/prefix_sum/TIL_neurips_release/data/prefix_sums_data/4096_data.pth
- __MACOSX/supp/code_release/prefix_sum/TIL_neurips_release/data/prefix_sums_data/._4096_data.pth
- supp/code_release/prefix_sum/TIL_neurips_release/data/prefix_sums_data/29_data.pth
- __MACOSX/supp/code_release/prefix_sum/TIL_neurips_release/data/prefix_sums_data/._29_data.pth
- supp/code_release/prefix_sum/TIL_neurips_release/data/prefix_sums_data/28_data.pth
- __MACOSX/supp/code_release/prefix_sum/TIL_neurips_release/data/prefix_sums_data/._28_data.pth
- supp/code_release/prefix_sum/TIL_neurips_release/data/prefix_sums_data/60_data.pth
- __MACOSX/supp/code_release/prefix_sum/TIL_neurips_release/data/prefix_sums_data/._60_data.pth
- supp/code_release/prefix_sum/TIL_neurips_release/data/prefix_sums_data/61_data.pth
- __MACOSX/supp/code_release/prefix_sum/TIL_neurips_release/data/prefix_sums_data/._61_data.pth
- supp/code_release/prefix_sum/TIL_neurips_release/data/prefix_sums_data/56_targets.pth
- __MACOSX/supp/code_release/prefix_sum/TIL_neurips_release/data/prefix_sums_data/._56_targets.pth
- supp/code_release/prefix_sum/TIL_neurips_release/data/prefix_sums_data/26_targets.pth
- __MACOSX/supp/code_release/prefix_sum/TIL_neurips_release/data/prefix_sums_data/._26_targets.pth
- supp/code_release/prefix_sum/TIL_neurips_release/data/prefix_sums_data/17_data.pth
- __MACOSX/supp/code_release/prefix_sum/TIL_neurips_release/data/prefix_sums_data/._17_data.pth
- supp/code_release/prefix_sum/TIL_neurips_release/data/prefix_sums_data/16_data.pth
- __MACOSX/supp/code_release/prefix_sum/TIL_neurips_release/data/prefix_sums_data/._16_data.pth
- supp/code_release/prefix_sum/TIL_neurips_release/data/prefix_sums_data/14_targets.pth
- __MACOSX/supp/code_release/prefix_sum/TIL_neurips_release/data/prefix_sums_data/._14_targets.pth
- supp/code_release/prefix_sum/TIL_neurips_release/data/prefix_sums_data/64_targets.pth
- __MACOSX/supp/code_release/prefix_sum/TIL_neurips_release/data/prefix_sums_data/._64_targets.pth
- supp/code_release/prefix_sum/TIL_neurips_release/data/prefix_sums_data/23_targets.pth
- __MACOSX/supp/code_release/prefix_sum/TIL_neurips_release/data/prefix_sums_data/._23_targets.pth
- supp/code_release/prefix_sum/TIL_neurips_release/data/prefix_sums_data/34_data.pth
- __MACOSX/supp/code_release/prefix_sum/TIL_neurips_release/data/prefix_sums_data/._34_data.pth
- supp/code_release/prefix_sum/TIL_neurips_release/data/prefix_sums_data/35_data.pth
- __MACOSX/supp/code_release/prefix_sum/TIL_neurips_release/data/prefix_sums_data/._35_data.pth
- supp/code_release/prefix_sum/TIL_neurips_release/data/prefix_sums_data/1024_targets.pth
- __MACOSX/supp/code_release/prefix_sum/TIL_neurips_release/data/prefix_sums_data/._1024_targets.pth
- supp/code_release/prefix_sum/TIL_neurips_release/data/prefix_sums_data/53_targets.pth
- __MACOSX/supp/code_release/prefix_sum/TIL_neurips_release/data/prefix_sums_data/._53_targets.pth
- supp/code_release/prefix_sum/TIL_neurips_release/data/prefix_sums_data/61_targets.pth
- __MACOSX/supp/code_release/prefix_sum/TIL_neurips_release/data/prefix_sums_data/._61_targets.pth
- supp/code_release/prefix_sum/TIL_neurips_release/data/prefix_sums_data/128_targets.pth
- __MACOSX/supp/code_release/prefix_sum/TIL_neurips_release/data/prefix_sums_data/._128_targets.pth
- supp/code_release/prefix_sum/TIL_neurips_release/data/prefix_sums_data/43_data.pth
- __MACOSX/supp/code_release/prefix_sum/TIL_neurips_release/data/prefix_sums_data/._43_data.pth
- supp/code_release/prefix_sum/TIL_neurips_release/data/prefix_sums_data/42_data.pth
- __MACOSX/supp/code_release/prefix_sum/TIL_neurips_release/data/prefix_sums_data/._42_data.pth
- supp/code_release/prefix_sum/TIL_neurips_release/data/prefix_sums_data/18_targets.pth
- __MACOSX/supp/code_release/prefix_sum/TIL_neurips_release/data/prefix_sums_data/._18_targets.pth
- supp/code_release/prefix_sum/TIL_neurips_release/data/prefix_sums_data/49_data.pth
- __MACOSX/supp/code_release/prefix_sum/TIL_neurips_release/data/prefix_sums_data/._49_data.pth
- supp/code_release/prefix_sum/TIL_neurips_release/data/prefix_sums_data/48_data.pth
- __MACOSX/supp/code_release/prefix_sum/TIL_neurips_release/data/prefix_sums_data/._48_data.pth
- supp/code_release/prefix_sum/TIL_neurips_release/data/prefix_sums_data/36_targets.pth
- __MACOSX/supp/code_release/prefix_sum/TIL_neurips_release/data/prefix_sums_data/._36_targets.pth
- supp/code_release/prefix_sum/TIL_neurips_release/data/prefix_sums_data/46_targets.pth
- __MACOSX/supp/code_release/prefix_sum/TIL_neurips_release/data/prefix_sums_data/._46_targets.pth
- supp/code_release/prefix_sum/TIL_neurips_release/data/prefix_sums_data/35_targets.pth
- __MACOSX/supp/code_release/prefix_sum/TIL_neurips_release/data/prefix_sums_data/._35_targets.pth
- supp/code_release/prefix_sum/TIL_neurips_release/data/prefix_sums_data/33_data.pth
- __MACOSX/supp/code_release/prefix_sum/TIL_neurips_release/data/prefix_sums_data/._33_data.pth
- supp/code_release/prefix_sum/TIL_neurips_release/data/prefix_sums_data/32_data.pth
- __MACOSX/supp/code_release/prefix_sum/TIL_neurips_release/data/prefix_sums_data/._32_data.pth
- supp/code_release/prefix_sum/TIL_neurips_release/data/prefix_sums_data/45_targets.pth
- __MACOSX/supp/code_release/prefix_sum/TIL_neurips_release/data/prefix_sums_data/._45_targets.pth
[truncated: 396 more entries]
