# Supplementary material
Source: ML conference proceedings conference paper supplement (https://proceedings.neurips.cc/paper_files/paper/2022/hash/331c41353b053683e17f7c88a797701d-Abstract.html)
Supplement: Supplementary file 1 [file 331c41353b053683e17f7c88a797701d-Supplemental-Conference.zip › supp/code_release/mazes/deep-thinking-main/config/problem/prefix_sums.yaml]

defaults:
  - hyp: prefix_sums_default
  - model: dt_net_recall_1d

name: prefix_sums
test_data: 512
train_data: 32
