# Supplementary material
Source: ML conference proceedings conference paper supplement (https://proceedings.neurips.cc/paper_files/paper/2022/hash/331c41353b053683e17f7c88a797701d-Abstract.html)
Supplement: Supplementary file 1 [file 331c41353b053683e17f7c88a797701d-Supplemental-Conference.zip › supp/code_release/mazes/deep-thinking-main/config/test_model_config.yaml]

defaults:
  - problem: prefix_sums
  - override hydra/job_logging: custom
  - _self_

hydra:
  run:
    dir: ./outputs/${name}/testing-${run_id}
  job_logging:
    handlers:
      file:
        filename: testing.log

name: testing_default

problem:
  model:
    test_iterations:
      low: 30
      high: 50
    model_path:

quick_test: False
model_name: model_best.pth
