# Supplementary material
Source: ML conference proceedings conference paper supplement (https://proceedings.neurips.cc/paper_files/paper/2022/hash/331c41353b053683e17f7c88a797701d-Abstract.html)
Supplement: Supplementary file 1 [file 331c41353b053683e17f7c88a797701d-Supplemental-Conference.zip › supp/code_release/mazes/deep-thinking-main/deepthinking/__init__.py]

from deepthinking.adjectives import adjectives
from deepthinking.names import names

from deepthinking.utils.testing import test
from deepthinking.utils.training import train, TrainingSetup

from deepthinking import models
from deepthinking import utils

__all__ = ["models", "utils", "train", "test", "TrainingSetup"]
