# Supplementary material
Source: ML conference proceedings conference paper supplement (https://proceedings.neurips.cc/paper_files/paper/2022/hash/331c41353b053683e17f7c88a797701d-Abstract.html)
Supplement: Supplementary file 1 [file 331c41353b053683e17f7c88a797701d-Supplemental-Conference.zip › supp/code_release/mazes/deep-thinking-main/deepthinking/adjectives.py]

adjectives = ['abased', 'abject', 'ablaze', 'abler', 'ablest', 'abloom', 'ablush', 'about', 'abreast', 'abridged', 'abroach', 'abroad', 'abrupt', 'abscessed', 'absolved', 'absorbed', 'abstruse', 'absurd', 'abused', 'abuzz', 'accrete', 'accrued', 'accurst', 'acerb', 'aching', 'acock', 'acold', 'acorned', 'acred', 'acrid', 'across', 'acting', 'added', 'addle', 'addorsed', 'adept', 'adjunct', 'admired', 'adnate', 'adored', 'adrift', 'adroit', 'adscript', 'adult', 'adunc', 'adust', 'advised', 'aery', 'afeard', 'afeared', 'affine', 'affined', 'afire', 'aflame', 'afloat', 'afoot', 'afoul', 'afraid', 'after', 'aftmost', 'agape', 'agaze', 'aged', 'ageing', 'ageless', 'agelong', 'aggrieved', 'aghast', 'agile', 'aging', 'agleam', 'agley', 'aglow', 'agnate', 'ago', 'agog', 'agone', 'agreed', 'aground', 'ahead', 'ahorse', 'ahull', 'aidful', 'aidless', 'ailing', 'aimless', 'ain', 'air', 'airborne', 'airless', 'airsick', 'airtight', 'ajar', 'akin', 'alar', 'alate', 'alert', 'algal', 'algid', 'algoid', 'alien', 'alight', 'alike', 'alined', 'alive', 'alleged', 'allowed', 'alloyed', 'alone', 'aloof', 'alright', 'altered', 'altern', 'alvine', 'amazed', 'amber', 'amiss', 'amok', 'amort', 'ample', 'amuck', 'amused', 'android', 'angled', 'anguine', 'anguished', 'anile', 'announced', 'ansate', 'anti', 'antic', 'antique', 'antlered', 'antlike', 'antrorse', 'anxious', 'apart', 'apeak', 'apish', 'appalled', 'applied', 'appressed', 'arcane', 'arching', 'argent', 'arid', 'armchair', 'armless', 'armored', 'aroid', 'aroused', 'arranged', 'arrant', 'arrased', 'arrhythmic', 'artful', 'artless', 'arty', 'ashake', 'ashamed', 'ashen', 'ashy', 'askance', 'askant', 'askew', 'asking', 'aslant', 'asleep', 'aslope', 'asphalt', 'asprawl', 'asquint', 'assumed', 'assured', 'astir', 'astral', 'astute', 'aswarm', 'athirst', 'athrill', 'atilt', 'atrip', 'attached', 'attack', 'attent', 'attired', 'attrite', 'attuned', 'audile', 'aurous', 'austere', 'averse', 'avid', 'avowed', 'awake', 'aware', 'awash', 'away', 'aweless', 'awesome', 'awestruck', 'awful', 'awheel', 'awing', 'awkward', 'awnless', 'awry', 'axile', 'azure', 'babbling', 'baccate', 'backboned', 'backhand', 'backless', 'backmost', 'backstage', 'backstair', 'backstairs', 'backswept', 'backward', 'backwoods', 'baddish', 'baffling', 'baggy', 'bairnly', 'balanced', 'balding', 'baldish', 'baleful', 'balky', 'bally', 'balmy', 'banal', 'bandaged', 'banded', 'baneful', 'bangled', 'bankrupt', 'banner', 'bannered', 'baptist', 'bar', 'barbate', 'bardic', 'bardy', 'bareback', 'barebacked', 'barefaced', 'barefoot', 'barer', 'barest', 'baric', 'barish', 'barkless', 'barky', 'barmy', 'baroque', 'barrelled', 'baseless', 'baser', 'basest', 'bashful', 'basic', 'bassy', 'bastioned', 'bated', 'battered', 'battled', 'batty', 'bausond', 'bawdy', 'beaded', 'beady', 'beaky', 'beaming', 'beamish', 'beamless', 'beamy', 'beardless', 'bearish', 'bearlike', 'beastlike', 'beastly', 'beaten', 'beating', 'beauish', 'becalmed', 'bedded', 'bedfast', 'bedight', 'bedimmed', 'bedrid', 'beechen', 'beefy', 'beery', 'beetle', 'befogged', 'begrimed', 'beguiled', 'behind', 'bellied', 'belted', 'bemazed', 'bemused', 'bended', 'bending', 'bendwise', 'bendy', 'benign', 'benthic', 'benzal', 'bereft', 'berried', 'berserk', 'besieged', 'bespoke', 'besprent', 'bestead', 'bestial', 'betrothed', 'beveled', 'biased', 'bifid', 'biform', 'bigger', 'biggest', 'biggish', 'bijou', 'bilgy', 'bilious', 'billion', 'billionth', 'bilobed', 'binate', 'biped', 'birchen', 'birdlike', 'birken', 'bistred', 'bitchy', 'bitless', 'bitten', 'bitty', 'bivalve', 'bizarre', 'blackish', 'blameful', 'blameless', 'blaring', 'blasted', 'blasting', 'blatant', 'bleary', 'blended', 'blending', 'blindfold', 'blinding', 'blinking', 'blissful', 'blissless', 'blithesome', 'bloated', 'blockish', 'blocky', 'blooded', 'bloodied', 'bloodshot', 'bloodstained', 'blooming', 'bloomless', 'bloomy', 'blotchy', 'blotto', 'blotty', 'blowhard', 'blowsy', 'blowy', 'blowzy', 'blubber', 'bluer', 'bluest', 'bluish', 'blurry', 'blushful', 'blushless', 'boarish', 'boastful', 'boastless', 'bobtail', 'bodger', 'bodied', 'boding', 'boggy', 'bogus', 'bomb', 'bombproof', 'boneless', 'bonism', 'bonkers', 'bony', 'bonzer', 'bookish', 'bookless', 'boorish', 'booted', 'bootleg', 'bootless', 'boozy', 'bordered', 'boring', 'bosker', 'bosky', 'bosom', 'bosomed', 'bossy', 'botchy', 'bouffant', 'boughten', 'bouilli', 'bouncy', 'bounded', 'bounden', 'boundless', 'bousy', 'bovid', 'bovine', 'bowing', 'boxlike', 'boyish', 'bracing', 'brackish', 'bractless', 'braggart', 'bragging', 'braided', 'brainless', 'brainsick', 'brainy', 'brakeless', 'brambly', 'branching', 'branchless', 'branchlike', 'branny', 'brashy', 'brassy', 'brattish', 'bratty', 'braver', 'bravest', 'braving', 'brawny', 'brazen', 'breaking', 'breakneck', 'breasted', 'breathless', 'breathy', 'breechless', 'breeding', 'breezeless', 'breezy', 'brickle', 'bricky', 'bridgeless', 'briefless', 'brilliant', 'brimful', 'brimless', 'brimming', 'brinded', 'brindle', 'brindled', 'brinish', 'briny', 'bristly', 'brittle', 'broadband', 'broadcast', 'broadish', 'broadloom', 'broadside', 'broch', 'broguish', 'bronzy', 'broody', 'broomy', 'browless', 'brownish', 'browny', 'bruising', 'brumal', 'brumous', 'brunet', 'brunette', 'brushless', 'brushy', 'brutal', 'brute', 'brutelike', 'brutish', 'bubbly', 'buccal', 'buckish', 'buckram', 'buckshee', 'buckskin', 'bucktooth', 'bucktoothed', 'budless', 'buggy', 'bughouse', 'buirdly', 'bulbar', 'bulbous', 'bulgy', 'bulky', 'bullate', 'bullied', 'bullish', 'bumbling', 'bumptious', 'bumpy', 'bunchy', 'bunted', 'buoyant', 'burdened', 'burghal', 'buried', 'burlesque', 'burly', 'burry', 'bursal', 'bursting', 'bushy', 'busied', 'buskined', 'bustled', 'busty', 'buttocked', 'buxom', 'bygone', 'byssal', 'caboched', 'caboshed', 'caddish', 'cadenced', 'cadent', 'cadgy', 'cagey', 'cagy', 'caitiff', 'calcic', 'calfless', 'caller', 'callous', 'callow', 'calmy', 'campy', 'cancelled', 'cancrine', 'cancroid', 'candent', 'candied', 'canine', 'cankered', 'canny', 'canty', 'cany', 'capeskin', 'caprine', 'captious', 'captive', 'cardboard', 'carefree', 'careful', 'careless', 'careworn', 'caring', 'carking', 'carlish', 'carmine', 'carnose', 'carpal', 'carping', 'carsick', 'carven', 'casebook', 'casteless', 'castled', 'catching', 'catchweight', 'catchy', 'cattish', 'catty', 'caudate', 'cauline', 'causal', 'causeless', 'cautious', 'cayenned', 'ceaseless', 'cecal', 'cedarn', 'ceilinged', 'censured', 'centered', 'centred', 'centric', 'centrist', 'centum', 'cercal', 'cerise', 'cerous', 'certain', 'cervid', 'cervine', 'cestoid', 'chaffless', 'chaffy', 'chainless', 'chairborne', 'chaliced', 'chalky', 'chambered', 'chanceful', 'chanceless', 'chancroid', 'chancrous', 'chancy', 'changeful', 'changeless', 'changing', 'chapeless', 'chargeful', 'chargeless', 'charming', 'charmless', 'charry', 'chartered', 'chartless', 'chary', 'chasmal', 'chasmic', 'chasmy', 'chasseur', 'chaster', 'chastest', 'chastised', 'chatty', 'checkered', 'checky', 'cheeky', 'cheerful', 'cheerless', 'cheerly', 'cheery', 'cheesy', 'chelate', 'chemic', 'chequy', 'cherty', 'chestnut', 'chesty', 'chevroned', 'chewy', 'chichi', 'chiefless', 'chiefly', 'chiffon', 'childing', 'childish', 'childless', 'childlike', 'childly', 'chill', 'chilly', 'chin', 'chintzy', 'chipper', 'chippy', 'chirpy', 'chiseled', 'chiselled', 'chlorous', 'chocker', 'choicer', 'chokey', 'choking', 'choky', 'chondral', 'choosey', 'choosy', 'chopping', 'choppy', 'choral', 'chordal', 'chordate', 'choric', 'chrismal', 'chronic', 'chthonic', 'chubby', 'chuffy', 'chummy', 'chunky', 'churchless', 'churchly', 'churchward', 'churchy', 'churlish', 'churning', 'chymous', 'cichlid', 'cirrate', 'cirrose', 'cirsoid', 'cissoid', 'cissy', 'cisted', 'cistic', 'citrous', 'citrus', 'clamant', 'clammy', 'clankless', 'clannish', 'clasping', 'classless', 'classy', 'clastic', 'clathrate', 'clausal', 'claustral', 'clavate', 'clawless', 'clayey', 'clayish', 'cleanly', 'cleansing', 'clerkish', 'clerkly', 'cliffy', 'clingy', 'clinquant', 'clipping', 'cliquey', 'cliquish', 'cliquy', 'clithral', 'clitic', 'clockwise', 'cloddish', 'cloddy', 'clogging', 'cloggy', 'cloistered', 'cloistral', 'clonic', 'closer', 'closest', 'clotty', 'clouded', 'cloudless', 'cloudy', 'clovered', 'clownish', 'cloying', 'clubby', 'clucky', 'clueless', 'clumpy', 'clumsy', 'clustered', 'coaly', 'coarser', 'coarsest', 'coastal', 'coastward', 'coastwise', 'coated', 'coatless', 'coccal', 'coccoid', 'cockney', 'cocksure', 'cocky', 'coffered', 'cogent', 'cognate', 'coky', 'coldish', 'collapsed', 'collect', 'colloid', 'colly', 'coltish', 'columned', 'comal', 'comate', 'combined', 'combless', 'combust', 'comely', 'comfy', 'coming', 'commie', 'commo', 'comose', 'compact', 'compelled', 'compleat', 'complete', 'compo', 'composed', 'concave', 'conceived', 'concerned', 'conchal', 'conchate', 'concise', 'condemned', 'condign', 'conferred', 'confined', 'confirmed', 'confused', 'conjoined', 'conjoint', 'conjunct', 'connate', 'conoid', 'conscious', 'constrained', 'consumed', 'contained', 'contrate', 'contrite', 'contrived', 'controlled', 'contused', 'convex', 'convict', 'convinced', 'cooing', 'cooking', 'coolish', 'copied', 'coppiced', 'corbelled', 'cordate', 'corded', 'cordial', 'cordless', 'coreless', 'corking', 'corky', 'cormous', 'cornered', 'cornute', 'corny', 'correct', 'corrupt', 'corvine', 'cosher', 'costal', 'costate', 'costive', 'costly', 'costumed', 'cottaged', 'couchant', 'counter', 'countless', 'courant', 'couthie', 'couthy', 'coxal', 'coyish', 'cozy', 'crabbed', 'crabby', 'crablike', 'crabwise', 'crackbrained', 'crackers', 'cracking', 'crackjaw', 'crackle', 'crackling', 'crackly', 'crackpot', 'craftless', 'crafty', 'cragged', 'craggy', 'cranky', 'crannied', 'crashing', 'craven', 'crawling', 'crawly', 'creaky', 'creamlaid', 'creamy', 'creasy', 'credent', 'creedal', 'creepy', 'crenate', 'crescive', 'cressy', 'crestless', 'cricoid', 'crimeless', 'crimpy', 'crimson', 'crinal', 'cringing', 'crinite', 'crinkly', 'crinoid', 'crinose', 'crippling', 'crispate', 'crispy', 'crisscross', 'cristate', 'croaky', 'crookback', 'crooked', 'crosiered', 'crossbred', 'crosstown', 'crosswise', 'croupous', 'croupy', 'crowded', 'crowing', 'crowning', 'crownless', 'crucial', 'cruder', 'crudest', 'cruel', 'crumbly', 'crumby', 'crummy', 'crumpled', 'crunchy', 'crural', 'crushing', 'crustal', 'crusted', 'crustless', 'crusty', 'crying', 'cryptal', 'cryptic', 'ctenoid', 'cubbish', 'cubist', 'cuboid', 'cultic', 'cultish', 'cultrate', 'cumbrous', 'cunning', 'cupric', 'cuprous', 'curbless', 'curdy', 'cureless', 'curly', 'currish', 'cursed', 'cursing', 'cursive', 'curtate', 'curving', 'curvy', 'cushy', 'cuspate', 'cussed', 'custom', 'cutcha', 'cuter', 'cutest', 'cyan', 'cycloid', 'cyclone', 'cymoid', 'cymose', 'cystoid', 'cytoid', 'czarist', 'daedal', 'daffy', 'daimen', 'dainty', 'daisied', 'dam', 'damaged', 'damfool', 'damning', 'dampish', 'dancing', 'dangling', 'dapper', 'dapple', 'dappled', 'daring', 'darkish', 'darkling', 'darksome', 'dashing', 'dastard', 'dated', 'dateless', 'dauby', 'dauntless', 'daylong', 'daytime', 'deathful', 'deathless', 'deathlike', 'deathly', 'deathy', 'debased', 'debauched', 'deceased', 'decent', 'declared', 'decreed', 'decurved', 'dedal', 'deedless', 'defaced', 'defiled', 'defined', 'deflexed', 'deformed', 'defunct', 'deictic', 'deism', 'deject', 'deltoid', 'demure', 'dendroid', 'denser', 'densest', 'dentate', 'dentoid', 'deposed', 'depraved', 'depressed', 'deprived', 'deranged', 'dermal', 'dermic', 'dermoid', 'dernier', 'descant', 'described', 'desert', 'deserved', 'designed', 'desired', 'desmoid', 'despised', 'destined', 'detached', 'detailed', 'deuced', 'deviled', 'devoid', 'devout', 'dewlapped', 'dewy', 'dextral', 'dextrorse', 'dextrous', 'diarch', 'dicey', 'dickey', 'dicky', 'diet', 'diffuse', 'diffused', 'dighted', 'diglot', 'dilute', 'dimmest', 'dimming', 'dimply', 'dingbats', 'dingy', 'dinkies', 'dinky', 'diplex', 'diploid', 'dippy', 'direful', 'direr', 'direst', 'dirty', 'discalced', 'disclosed', 'discoid', 'discreet', 'discrete', 'diseased', 'disgraced', 'disguised', 'dishy', 'disjoined', 'disjoint', 'disjunct', 'disliked', 'dispensed', 'disperse', 'dispersed', 'displayed', 'displeased', 'disposed', 'dissolved', 'distal', 'distent', 'distilled', 'distinct', 'distrait', 'distraught', 'distressed', 'disturbed', 'distyle', 'disused', 'divers', 'diverse', 'divorced', 'dizzied', 'dizzy', 'docile', 'dockside', 'doddered', 'dodgy', 'dogged', 'dogging', 'doggish', 'doggone', 'doggoned', 'doggy', 'doglike', 'doited', 'doleful', 'dolesome', 'dollish', 'doltish', 'donnard', 'donnered', 'donnish', 'donsie', 'dopey', 'dopy', 'dormant', 'dormie', 'dormy', 'dorty', 'dotal', 'doting', 'dotted', 'doty', 'doubling', 'doubtful', 'doubting', 'doubtless', 'doughy', 'dovelike', 'dovetailed', 'dovish', 'dowdy', 'dowie', 'downbeat', 'downhill', 'downrange', 'downright', 'downstage', 'downstair', 'downstairs', 'downstate', 'downstream', 'downwind', 'dozen', 'dozenth', 'dozing', 'dozy', 'draffy', 'drafty', 'dragging', 'draggy', 'draining', 'drastic', 'dratted', 'draughty', 'dreadful', 'dreamful', 'dreamless', 'dreamlike', 'dreamy', 'dreary', 'dreggy', 'dressy', 'drier', 'driest', 'driftless', 'drifty', 'drippy', 'driven', 'drizzly', 'droning', 'dronish', 'droopy', 'dropping', 'dropsied', 'drossy', 'droughty', 'drouthy', 'drowsing', 'drowsy', 'drudging', 'drumly', 'drunken', 'dryer', 'ducal', 'duckbill', 'duckie', 'ducky', 'ductile', 'duddy', 'dudish', 'dulcet', 'dullish', 'dumbstruck', 'dumpish', 'dun', 'dungy', 'dural', 'duskish', 'dusky', 'dustless', 'dustproof', 'dwarfish', 'dyeline', 'dying', 'earnest', 'earthborn', 'earthbound', 'earthen', 'earthly', 'earthquaked', 'earthward', 'earthy', 'easeful', 'eastbound', 'eastmost', 'eastward', 'eaten', 'eating', 'ebon', 'eccrine', 'ecru', 'edgeless', 'edging', 'edgy', 'eely', 'eerie', 'eery', 'effete', 'effluent', 'effuse', 'egal', 'eighteen', 'eighteenth', 'eightfold', 'eighty', 'elapsed', 'elder', 'eldest', 'eldritch', 'elect', 'elfin', 'elfish', 'elite', 'elmy', 'elvish', 'embowed', 'emersed', 'emptied', 'enarched', 'enate', 'encased', 'enceinte', 'endarch', 'endless', 'endmost', 'endorsed', 'endways', 'enforced', 'engorged', 'engrailed', 'engrained', 'engraved', 'enhanced', 'enjambed', 'enlarged', 'enorm', 'enough', 'enow', 'enraged', 'enrapt', 'enrolled', 'enslaved', 'enthralled', 'entire', 'entranced', 'enured', 'enwrapped', 'equine', 'equipped', 'erased', 'erect', 'ermined', 'erose', 'errant', 'errhine', 'erring', 'ersatz', 'erstwhile', 'escaped', 'essive', 'estranged', 'estrous', 'eterne', 'ethic', 'ethmoid', 'ethnic', 'eustyle', 'evens', 'evoked', 'exact', 'exarch', 'exchanged', 'excused', 'exempt', 'exhaled', 'expert', 'expired', 'exposed', 'exsert', 'extant', 'extinct', 'extrorse', 'eyeless', 'fabled', 'faceless', 'facete', 'factious', 'faddish', 'faddy', 'faded', 'fadeless', 'fading', 'faecal', 'failing', 'faintish', 'fairish', 'faithful', 'faithless', 'falcate', 'falser', 'falsest', 'fameless', 'famished', 'famous', 'fancied', 'fanfold', 'fangled', 'fangless', 'farand', 'farci', 'farfetched', 'farming', 'farouche', 'farrow', 'farther', 'farthest', 'fatal', 'fated', 'fateful', 'fatigue', 'fatigued', 'fatless', 'fatter', 'fattest', 'fattish', 'faucal', 'faucial', 'faultless', 'faulty', 'faunal', 'favored', 'favoured', 'fearful', 'fearless', 'fearsome', 'feastful', 'feathered', 'featured', 'febrile', 'fecal', 'feckless', 'fecund', 'federalist', 'feeble', 'feeblish', 'feeling', 'feisty', 'feline', 'felon', 'felsic', 'fenny', 'feodal', 'feral', 'ferine', 'ferny', 'fervent', 'fervid', 'fesswise', 'festal', 'festive', 'fetching', 'fetial', 'fetid', 'feudal', 'fewer', 'fibered', 'fibroid', 'fibrous', 'fickle', 'fictile', 'fictive', 'fiddling', 'fiddly', 'fiendish', 'fiercer', 'fiercest', 'fifteen', 'fifteenth', 'fifty', 'filar', 'filial', 'filose', 'filthy', 'filtrable', 'financed', 'fineable', 'finer', 'finest', 'fingered', 'finished', 'finite', 'finless', 'finny', 'fireproof', 'firry', 'fishy', 'fissile', 'fistic', 'fitchy', 'fitful', 'fitted', 'fitter', 'fitting', 'fivefold', 'fizzy', 'flabby', 'flaccid', 'flagging', 'flaggy', 'flagrant', 'flameproof', 'flaming', 'flamy', 'flappy', 'flaring', 'flashy', 'flatling', 'flattest', 'flattish', 'flaunty', 'flawless', 'flawy', 'flaxen', 'fleckless', 'fledgeling', 'fledgling', 'fledgy', 'fleeceless', 'fleecy', 'fleeing', 'fleeting', 'fleshless', 'fleshly', 'fleshy', 'flexile', 'flightless', 'flighty', 'flimsy', 'flinty', 'flippant', 'flipping', 'flitting', 'floaty', 'floccose', 'floccus', 'flooded', 'floodlit', 'floppy', 'florid', 'flory', 'flossy', 'floury', 'flowered', 'flowing', 'fluent', 'fluffy', 'flukey', 'fluky', 'flurried', 'fluted', 'fluty', 'flyweight', 'foamless', 'foamy', 'focused', 'focussed', 'foetal', 'foetid', 'fogbound', 'foggy', 'fogless', 'folded', 'folkish', 'folklore', 'folksy', 'fontal', 'foodless', 'foolish', 'foolproof', 'footed', 'footless', 'footling', 'footsore', 'footworn', 'foppish', 'forceful', 'forceless', 'forehand', 'foremost', 'forenamed', 'foresaid', 'foreseen', 'forespent', 'foretold', 'forfeit', 'forky', 'former', 'formless', 'fornent', 'forspent', 'forte', 'forthright', 'fortis', 'forworn', 'foughten', 'fourfold', 'fourscore', 'foursquare', 'fourteenth', 'foxy', 'fozy', 'fractious', 'fractured', 'fragile', 'fragrant', 'frantic', 'fratchy', 'fraudful', 'frazzled', 'freakish', 'freaky', 'freckly', 'freebie', 'freeborn', 'freeing', 'freer', 'freest', 'frenzied', 'frequent', 'freshman', 'fretful', 'fretted', 'fretty', 'fribble', 'friended', 'friendless', 'frightened', 'frightful', 'frilly', 'fringeless', 'frisky', 'frizzly', 'frizzy', 'frockless', 'frolic', 'fronded', 'frontal', 'frontier', 'frontless', 'frosted', 'frostless', 'frostlike', 'frosty', 'frothy', 'froward', 'frowsty', 'frowsy', 'frowzy', 'frozen', 'fructed', 'frugal', 'fruited', 'fruitful', 'fruitless', 'fruity', 'frumpish', 'frumpy', 'frustrate', 'fubsy', 'fucoid', 'fugal', 'fulfilled', 'fulgent', 'fulgid', 'fulsome', 'fulvous', 'fumy', 'funded', 'funest', 'fungal', 'fungoid', 'fungous', 'funky', 'furcate', 'furry', 'furthest', 'furtive', 'furzy', 'fuscous', 'fusil', 'fusile', 'fussy', 'fustian', 'fusty', 'futile', 'fuzzy', 'gabbroid', 'gabled', 'gadoid', 'gadrooned', 'gaga', 'gainful', 'gainless', 'gainly', 'gaited', 'galliard', 'galling', 'gallooned', 'galore', 'gamer', 'gamesome', 'gamest', 'gamey', 'gamic', 'gammy', 'gamy', 'gangling', 'gangly', 'ganoid', 'gaping', 'gardant', 'garish', 'garni', 'gassy', 'gated', 'gateless', 'gaudy', 'gaumless', 'gauzy', 'gawky', 'gawsy', 'gearless', 'geegaw', 'gelded', 'gelid', 'gemel', 'gemmate', 'gemmy', 'genal', 'genial', 'genic', 'genteel', 'genty', 'georgic', 'germane', 'gestic', 'gewgaw', 'ghastful', 'ghastly', 'ghostly', 'ghoulish', 'gibbose', 'gibbous', 'giddied', 'giddy', 'gifted', 'giggly', 'gilded', 'gimcrack', 'gimlet', 'gimpy', 'girlish', 'girly', 'giving', 'glabrate', 'glabrous', 'glacial', 'gladsome', 'glaikit', 'glairy', 'glandered', 'glaring', 'glary', 'glasslike', 'glassy', 'gleeful', 'gleesome', 'gleety', 'glenoid', 'glial', 'glibber', 'glibbest', 'globate', 'globoid', 'globose', 'gloomful', 'glooming', 'gloomy', 'glossies', 'glossy', 'glottic', 'glowing', 'gluey', 'glummer', 'glummest', 'glumpy', 'glutted', 'glyphic', 'glyptic', 'gnarly', 'gnathic', 'gneissic', 'gneissoid', 'gnomic', 'gnomish', 'goalless', 'goateed', 'goatish', 'goddam', 'goddamn', 'goddamned', 'godless', 'godlike', 'godly', 'goitrous', 'goodish', 'goodly', 'gooey', 'goofy', 'goosey', 'goosy', 'gorgeous', 'gormless', 'gorsy', 'gory', 'gouty', 'gowaned', 'goyish', 'graceful', 'graceless', 'gracile', 'gracious', 'gradely', 'grainy', 'grapey', 'grapy', 'grasping', 'graspless', 'grassy', 'grateful', 'grating', 'gratis', 'grave', 'gravel', 'graveless', 'gravest', 'gravid', 'grayish', 'greening', 'greenish', 'greensick', 'greyish', 'griefless', 'grieving', 'grimmer', 'grimmest', 'grimy', 'gripping', 'gripple', 'grippy', 'grisly', 'gristly', 'gritty', 'grizzled', 'groggy', 'groovy', 'groping', 'grotesque', 'grotty', 'grouchy', 'groundless', 'grouty', 'grubby', 'grudging', 'gruesome', 'gruffish', 'grumbly', 'grummer', 'grummest', 'grumose', 'grumous', 'grumpy', 'gruntled', 'guardant', 'guarded', 'guardless', 'guideless', 'guiding', 'guileful', 'guileless', 'guiltless', 'guilty', 'gular', 'gulfy', 'gummous', 'gummy', 'gumptious', 'gunless', 'gushy', 'gusty', 'gutless', 'gutsy', 'gutta', 'guttate', 'gyral', 'gyrate', 'gyrose', 'habile', 'hackly', 'hackneyed', 'hadal', 'haemal', 'haemic', 'haggish', 'hairless', 'hairlike', 'halest', 'halftone', 'hallowed', 'haloid', 'halting', 'hamate', 'hammered', 'hammy', 'handed', 'handled', 'handless', 'handmade', 'handsome', 'handworked', 'handwrought', 'handy', 'hangdog', 'hapless', 'haploid', 'haptic', 'harassed', 'hardback', 'hardened', 'hardwood', 'harlot', 'harmful', 'harmless', 'harnessed', 'harried', 'hastate', 'hasty', 'hatching', 'hated', 'hateful', 'hatless', 'hatted', 'haughty', 'haunted', 'haunting', 'hawkish', 'hawklike', 'haywire', 'hazy', 'headed', 'headfirst', 'headless', 'headlong', 'headmost', 'headstrong', 'heady', 'healing', 'healthful', 'healthy', 'heaping', 'heapy', 'hearted', 'heartfelt', 'hearties', 'heartless', 'heartsome', 'hearty', 'heated', 'heathen', 'heathy', 'heating', 'heavies', 'heaving', 'hectic', 'hedgy', 'heedful', 'heedless', 'heelless', 'hefty', 'heinous', 'heirless', 'hellish', 'helmless', 'helpful', 'helpless', 'hemal', 'hempen', 'hempy', 'hennaed', 'herbaged', 'herbal', 'herbless', 'herby', 'here', 'hidden', 'highbrow', 'highest', 'hilding', 'hilly', 'hinder', 'hindmost', 'hindward', 'hipper', 'hippest', 'hippy', 'hircine', 'hirsute', 'hispid', 'hissing', 'histie', 'histoid', 'hitchy', 'hither', 'hiveless', 'hivelike', 'hobnail', 'hobnailed', 'hoggish', 'hoiden', 'holey', 'hollow', 'holmic', 'holstered', 'homebound', 'homeless', 'homelike', 'homely', 'homesick', 'homespun', 'homeward', 'homey', 'homy', 'honest', 'honeyed', 'honied', 'hoodless', 'hoofless', 'hooly', 'hopeful', 'hopeless', 'hopping', 'horal', 'hornish', 'hornless', 'hornlike', 'horny', 'horrent', 'horrid', 'horsey', 'horsy', 'hotfoot', 'hotshot', 'hotter', 'hottest', 'hotting', 'hottish', 'hourlong', 'hourly', 'housebound', 'houseless', 'hoven', 'howling', 'hoyden', 'hueless', 'huffish', 'huffy', 'huger', 'hugest', 'hulking', 'hulky', 'humbler', 'humdrum', 'humic', 'humid', 'hummel', 'humpbacked', 'humpy', 'hunchback', 'hunchbacked', 'hundredth', 'hungry', 'hunky', 'hunted', 'hurling', 'hurried', 'hurtful', 'hurtless', 'hurtling', 'husky', 'hydric', 'hydro', 'hydroid', 'hydrous', 'hymnal', 'hyoid', 'hyphal', 'hypnoid', 'icky', 'ictic', 'idem', 'idled', 'idlest', 'idling', 'iffy', 'ignored', 'imbued', 'immane', 'immense', 'immersed', 'immune', 'impel', 'impelled', 'impish', 'implied', 'imposed', 'improved', 'impure', 'inane', 'inapt', 'inboard', 'inborn', 'inbound', 'inbred', 'inbreed', 'inby', 'incased', 'incensed', 'incised', 'incog', 'increased', 'incrust', 'incult', 'incurved', 'incuse', 'indign', 'indoor', 'indrawn', 'inept', 'infect', 'infelt', 'infirm', 'inflamed', 'inflexed', 'inform', 'informed', 'ingrain', 'ingrained', 'ingrate', 'ingrown', 'inhaled', 'inhumed', 'injured', 'inky', 'inlaid', 'inmost', 'innate', 'inphase', 'inrush', 'insane', 'inscribed', 'inshore', 'insides', 'inspired', 'instinct', 'insured', 'intact', 'intense', 'intent', 'intern', 'interred', 'intime', 'intoed', 'intoned', 'intown', 'introrse', 'inured', 'involved', 'inward', 'inwrought', 'irate', 'ireful', 'irksome', 'itching', 'itchy', 'ivied', 'jaded', 'jadish', 'jagged', 'jaggy', 'jammy', 'jangly', 'jannock', 'japan', 'jarring', 'jasp', 'jaundiced', 'jazzy', 'jealous', 'jejune', 'jellied', 'jerky', 'jessant', 'jestful', 'jesting', 'jet', 'jetting', 'jetty', 'jeweled', 'jewelled', 'jiggered', 'jiggish', 'jiggly', 'jingly', 'jobless', 'jocose', 'jocund', 'jointed', 'jointless', 'jointured', 'joking', 'jolty', 'jouncing', 'jowly', 'joyful', 'joyless', 'joyous', 'jubate', 'jugal', 'jugate', 'juiceless', 'juicy', 'jumbled', 'jumpy', 'jungly', 'jural', 'jurant', 'jussive', 'jutting', 'kacha', 'kaput', 'karmic', 'karstic', 'kayoed', 'kerchiefed', 'keyless', 'khaki', 'kidnapped', 'killing', 'kilted', 'kindless', 'kindly', 'kindred', 'kingless', 'kinglike', 'kingly', 'kinky', 'kinless', 'kirtled', 'kittle', 'klephtic', 'klutzy', 'knaggy', 'knavish', 'kneeling', 'knickered', 'knifeless', 'knightless', 'knightly', 'knitted', 'knobby', 'knotless', 'knotted', 'knotty', 'knowing', 'knuckly', 'knurly', 'kookie', 'kooky', 'kosher', 'kutcha', 'labelled', 'labile', 'labored', 'laboured', 'labrid', 'labroid', 'lacking', 'lacy', 'laddish', 'laden', 'laggard', 'laic', 'lairy', 'laky', 'lambdoid', 'lambent', 'lamblike', 'lamer', 'lamest', 'laming', 'lanate', 'landed', 'landless', 'landscaped', 'landward', 'languid', 'lanky', 'lanose', 'lapelled', 'lapstrake', 'larboard', 'larger', 'largest', 'largish', 'larine', 'larkish', 'larky', 'larval', 'lashing', 'lasting', 'lated', 'lateen', 'later', 'latest', 'lathlike', 'lathy', 'latish', 'latter', 'latticed', 'laurelled', 'lavish', 'lawful', 'lawless', 'lawny', 'leachy', 'leaden', 'leadless', 'leady', 'leafless', 'leafy', 'leaky', 'leaning', 'leaping', 'learned', 'leary', 'leathern', 'ledgy', 'leery', 'leftward', 'legged', 'leggy', 'legit', 'legless', 'leisure', 'leisured', 'lengthways', 'lengthwise', 'lengthy', 'lenis', 'lenten', 'lentic', 'lento', 'lentoid', 'leprose', 'leprous', 'lettered', 'licenced', 'licensed', 'licit', 'lidded', 'lidless', 'liege', 'lifeful', 'lifeless', 'lifelike', 'lifelong', 'lighted', 'lightfast', 'lightful', 'lightish', 'lightless', 'lightsome', 'lightweight', 'lignite', 'likely', 'lilied', 'limbate', 'limbless', 'limey', 'limpid', 'limy', 'liney', 'lingual', 'linty', 'liny', 'lipless', 'lipoid', 'lippy', 'lissom', 'lissome', 'listless', 'lither', 'lithesome', 'lithest', 'lithic', 'litho', 'lithoid', 'litten', 'littler', 'littlest', 'livelong', 'lively', 'livid', 'loaded', 'loamy', 'loathful', 'loathly', 'loathsome', 'lobar', 'lobate', 'lobose', 'lofty', 'logy', 'lonesome', 'longer', 'longhand', 'longing', 'longish', 'longsome', 'longwall', 'longwise', 'looking', 'loonies', 'loopy', 'looser', 'loosest', 'lordless', 'lordly', 'losel', 'losing', 'lossy', 'lotic', 'loudish', 'lounging', 'louring', 'loury', 'lousy', 'loutish', 'louvered', 'louvred', 'loveless', 'lovelorn', 'lovely', 'lovesick', 'lovesome', 'lowly', 'loyal', 'lozenged', 'lubric', 'lucent', 'lucid', 'luckless', 'lukewarm', 'lumpen', 'lumpish', 'lunate', 'lupine', 'lurdan', 'lurid', 'luscious', 'lushy', 'lustful', 'lustral', 'lustred', 'lustrous', 'lusty', 'lying', 'lymphoid', 'lyrate', 'lyric', 'macled', 'madcap', 'maddest', 'madding', 'maigre', 'mainstream', 'maintained', 'makeless', 'makeshift', 'malar', 'male', 'malign', 'malty', 'mammoth', 'man', 'maneless', 'manful', 'mangey', 'mangy', 'manic', 'manky', 'manlike', 'mannered', 'mannish', 'mansard', 'mantic', 'many', 'marching', 'mardy', 'marish', 'maroon', 'married', 'marshy', 'masking', 'massive', 'massy', 'mastless', 'mastoid', 'matchless', 'mated', 'matey', 'matin', 'matted', 'mature', 'maudlin', 'maungy', 'mawkish', 'maxi', 'mazy', 'meager', 'meagre', 'meaning', 'measled', 'measly', 'measured', 'meaty', 'medley', 'melic', 'mellow', 'mensal', 'menseful', 'menseless', 'mere', 'merest', 'merging', 'mesarch', 'meshed', 'mesic', 'messier', 'messy', 'metalled', 'mettled', 'mickle', 'middling', 'midget', 'midi', 'midmost', 'midship', 'midships', 'miffy', 'mighty', 'migrant', 'milkless', 'million', 'millionth', 'millrun', 'mimic', 'mincing', 'minded', 'mindful', 'mindless', 'mingy', 'mini', 'minim', 'minion', 'minute', 'mirky', 'mirthful', 'mirthless', 'miry', 'mis', 'misformed', 'mislaid', 'misproud', 'missive', 'misty', 'mistyped', 'misused', 'mitered', 'mizzen', 'mnemic', 'moanful', 'mobbish', 'model', 'modeled', 'modest', 'modish', 'molal', 'molar', 'moldy', 'molten', 'monarch', 'moneyed', 'monger', 'mongrel', 'monied', 'monism', 'monkish', 'mono', 'monstrous', 'montane', 'monthly', 'mony', 'moody', 'moonish', 'moonless', 'moonlit', 'moonstruck', 'moony', 'moory', 'mopey', 'mopy', 'mordant', 'moreish', 'morish', 'morose', 'mossy', 'motey', 'mothy', 'motile', 'motored', 'mottled', 'mounted', 'mournful', 'mousey', 'mousy', 'mouthless', 'mouthy', 'moveless', 'mowburnt', 'mucid', 'mucking', 'muckle', 'mucky', 'mucoid', 'muddy', 'muggy', 'muley', 'mulish', 'mulley', 'mumchance', 'mundane', 'mural', 'murine', 'murky', 'murrey', 'muscid', 'muscly', 'museful', 'mushy', 'musing', 'musky', 'mussy', 'mustached', 'musty', 'mutant', 'muted', 'muzzy', 'mythic', 'nacred', 'nagging', 'naggy', 'naiant', 'naif', 'nailless', 'naissant', 'naive', 'nameless', 'naming', 'napless', 'napping', 'nappy', 'nary', 'nascent', 'nasty', 'natant', 'natty', 'naughty', 'nauseous', 'needful', 'needless', 'needy', 'negroid', 'neighbor', 'neighbour', 'nephric', 'nerval', 'nervate', 'nerveless', 'nervine', 'nervy', 'nescient', 'nested', 'nestlike', 'netted', 'nettly', 'neural', 'neuron', 'neuter', 'newborn', 'newish', 'newsless', 'newsy', 'nicer', 'nicest', 'nifty', 'niggard', 'niggling', 'nightless', 'nightlong', 'nightly', 'nimble', 'nimbused', 'ninefold', 'nineteen', 'ninety', 'nipping', 'nippy', 'nitid', 'nitty', 'nival', 'nobby', 'nocent', 'nodal', 'nodding', 'nodose', 'nodous', 'noiseless', 'noisette', 'noisome', 'noisy', 'nonplused', 'nonplussed', 'nonstick', 'northmost', 'northward', 'nosey', 'notal', 'notchy', 'noted', 'noteless', 'noticed', 'notour', 'novel', 'novice', 'noxious', 'nubbly', 'nubile', 'nudist', 'numbing', 'nuptial', 'nutant', 'nutlike', 'nutmegged', 'nutty', 'nymphal', 'oafish', 'oaken', 'oarless', 'oaten', 'obese', 'oblate', 'obliged', 'oblique', 'oblong', 'obscene', 'obscure', 'observed', 'obtect', 'obtuse', 'obverse', 'occult', 'ocher', 'ochre', 'ocker', 'oddball', 'offbeat', 'offhand', 'offish', 'offscreen', 'offshore', 'offside', 'often', 'oily', 'okay', 'olden', 'older', 'oldest', 'olid', 'only', 'onshore', 'onside', 'onstage', 'onward', 'oozing', 'oozy', 'ornate', 'orphan', 'ortho', 'oscine', 'osiered', 'osmic', 'osmous', 'otic', 'outback', 'outboard', 'outbound', 'outbred', 'outcast', 'outcaste', 'outdone', 'outdoor', 'outland', 'outlaw', 'outlined', 'outmost', 'outraged', 'outright', 'outsize', 'outsized', 'outspread', 'outworn', 'ovate', 'over', 'overt', 'ovine', 'ovoid', 'owing', 'owlish', 'owllike', 'packaged', 'padded', 'pagan', 'painful', 'painless', 'paler', 'palest', 'paling', 'palish', 'pallid', 'pally', 'palmar', 'palmate', 'palmy', 'palpate', 'palsied', 'paltry', 'paly', 'pan', 'paneled', 'panniered', 'panzer', 'papist', 'pappose', 'pappy', 'par', 'pardine', 'parklike', 'parky', 'parlous', 'parol', 'parotid', 'parted', 'partite', 'pass', 'passant', 'passless', 'pasteboard', 'pasted', 'pastel', 'pasties', 'pasty', 'patchy', 'patent', 'pathic', 'pathless', 'patient', 'paunchy', 'pausal', 'pauseful', 'pauseless', 'pavid', 'pawky', 'payoff', 'peaceful', 'peaceless', 'peachy', 'peaked', 'peaky', 'pearlized', 'peaty', 'pebbly', 'peccant', 'peckish', 'pedal', 'pedate', 'peddling', 'peeling', 'peerless', 'peevish', 'peewee', 'peltate', 'pelting', 'pencilled', 'pendant', 'pendent', 'pending', 'penile', 'pennate', 'pennied', 'pennoned', 'pensile', 'pensive', 'peppy', 'perceived', 'percent', 'percoid', 'perished', 'perjured', 'perky', 'perplexed', 'perverse', 'pesky', 'petalled', 'petite', 'petrous', 'pettish', 'pewter', 'phaseless', 'phasic', 'phasmid', 'phatic', 'phlegmy', 'phocine', 'phonal', 'phoney', 'phonic', 'phony', 'photic', 'phrenic', 'phthisic', 'phylloid', 'physic', 'piano', 'picked', 'pickled', 'picky', 'pictured', 'piddling', 'piebald', 'piecemeal', 'piercing', 'piggie', 'piggish', 'pillaged', 'pillared', 'pilose', 'pimpled', 'pimply', 'pinchbeck', 'piney', 'pinguid', 'pinkish', 'pinnate', 'pinpoint', 'piny', 'pious', 'pipeless', 'pipelike', 'piping', 'pipy', 'piquant', 'piscine', 'pitchy', 'pithy', 'pitted', 'placeless', 'placid', 'placoid', 'plagal', 'plaguey', 'plaguy', 'plaided', 'plaintive', 'plangent', 'plantar', 'plantless', 'plashy', 'plastered', 'plastics', 'plated', 'platy', 'plausive', 'playful', 'pleading', 'pleasing', 'plebby', 'pleural', 'pliant', 'plical', 'plicate', 'plodding', 'plosive', 'plotful', 'plotless', 'plucky', 'plumaged', 'plumate', 'plumbic', 'plumbless', 'plumbous', 'plummy', 'plumose', 'plumy', 'plusher', 'plushest', 'poachy', 'pockmarked', 'pocky', 'podgy', 'poignant', 'pointing', 'pointless', 'pokey', 'pokies', 'poky', 'polished', 'polite', 'pollened', 'poltroon', 'pompous', 'ponceau', 'pongid', 'poorly', 'poppied', 'porcine', 'porky', 'porous', 'porrect', 'portly', 'possessed', 'postern', 'postiche', 'postponed', 'potent', 'potted', 'potty', 'powered', 'practic', 'practiced', 'practised', 'praising', 'prayerful', 'prayerless', 'preachy', 'preborn', 'precast', 'precise', 'prefab', 'preggers', 'pregnant', 'premed', 'premier', 'premiere', 'premorse', 'prepared', 'prepense', 'preschool', 'prescribed', 'prescript', 'present', 'preserved', 'preset', 'pressing', 'pressor', 'presto', 'presumed', 'pretend', 'pretty', 'prewar', 'priceless', 'pricey', 'pricy', 'prideful', 'prideless', 'priestly', 'priggish', 'primal', 'primate', 'primsie', 'princely', 'printed', 'printless', 'prissy', 'pristine', 'privies', 'probing', 'produced', 'profane', 'profaned', 'professed', 'profound', 'profuse', 'prolate', 'prolix', 'pronounced', 'proposed', 'proscribed', 'prostate', 'prostrate', 'prostyle', 'prosy', 'proven', 'provoked', 'prowessed', 'proxy', 'prudent', 'prudish', 'prunted', 'prying', 'pseudo', 'psycho', 'pubic', 'pucka', 'puddly', 'pudgy', 'puffy', 'puggish', 'puggy', 'puisne', 'pukka', 'puling', 'pulpy', 'pulsing', 'punchy', 'punctate', 'punctured', 'pungent', 'punkah', 'puny', 'pupal', 'purblind', 'purer', 'purest', 'purging', 'purplish', 'purpure', 'pursued', 'pursy', 'pushing', 'pushy', 'pussy', 'putrid', 'pygmoid', 'pyknic', 'pyoid', 'quadrate', 'quadric', 'quaggy', 'quaky', 'qualmish', 'quantal', 'quartan', 'quartered', 'quartic', 'quartile', 'queasy', 'queenless', 'queenly', 'quenchless', 'quibbling', 'quickset', 'quiet', 'quilted', 'quinate', 'quinoid', 'quinsied', 'quintan', 'quintic', 'quippish', 'quirky', 'quondam', 'rabic', 'rabid', 'racemed', 'racing', 'racist', 'racy', 'raddled', 'raffish', 'raging', 'rainier', 'rainless', 'rainproof', 'raising', 'rakehell', 'rakish', 'ralline', 'ramal', 'rambling', 'rammish', 'ramose', 'rampant', 'ramstam', 'rancid', 'randie', 'randy', 'rangy', 'ranking', 'raploch', 'rarer', 'rarest', 'raring', 'rascal', 'rasping', 'raspy', 'ratite', 'ratlike', 'rattish', 'rattling', 'rattly', 'ratty', 'raucous', 'raunchy', 'ravaged', 'raving', 'rawboned', 'rawish', 'rayless', 'rearmost', 'rearward', 'reasoned', 'rebel', 'reborn', 'rebuked', 'reckless', 'recluse', 'record', 'rectal', 'recurved', 'redder', 'reddest', 'reddish', 'reedy', 'reeky', 'refer', 'refined', 'regal', 'regent', 'regnal', 'regnant', 'released', 'relieved', 'remiss', 'remnant', 'removed', 'rending', 'renowned', 'rental', 'repand', 'repent', 'replete', 'reproved', 'reptant', 'reptile', 'required', 'rescued', 'resigned', 'resolved', 'restful', 'resting', 'restive', 'restless', 'restored', 'retail', 'retained', 'retired', 'retral', 'retrorse', 'retuse', 'revealed', 'revered', 'reviled', 'revived', 'revolved', 'rheumy', 'rhinal', 'rhodic', 'rhomboid', 'rhotic', 'rhythmic', 'riant', 'ribald', 'ribless', 'riblike', 'ridden', 'rident', 'ridgy', 'riftless', 'righteous', 'rightful', 'rightish', 'rightist', 'rightward', 'rigid', 'riming', 'rimless', 'rimose', 'rimy', 'rindless', 'rindy', 'ringent', 'ringless', 'ripping', 'ripply', 'risen', 'risky', 'riteless', 'ritzy', 'rival', 'riven', 'roadless', 'roasting', 'robust', 'rodded', 'rodless', 'rodlike', 'roguish', 'roily', 'rollneck', 'rompish', 'roofless', 'rooky', 'roomy', 'rooted', 'rootless', 'rootlike', 'ropy', 'roseless', 'roselike', 'rostral', 'rosy', 'rotate', 'rotted', 'rotting', 'rotund', 'roughcast', 'roughish', 'rounded', 'rounding', 'roundish', 'roupy', 'rousing', 'routed', 'routine', 'rowdy', 'rubbly', 'rubied', 'rubric', 'rudish', 'rueful', 'ruffled', 'rufous', 'rugged', 'rugose', 'ruling', 'rumbly', 'rummy', 'rumpless', 'runic', 'runny', 'runtish', 'runty', 'rushing', 'rushy', 'russet', 'rustic', 'rustred', 'rusty', 'ruthful', 'ruthless', 'rutted', 'ruttish', 'rutty', 'saclike', 'sacral', 'sadist', 'sagging', 'said', 'sainted', 'saintly', 'saline', 'sallow', 'saltant', 'salted', 'saltier', 'saltish', 'saltless', 'salty', 'salving', 'sandalled', 'sanded', 'sandy', 'saner', 'sanest', 'sanguine', 'sapid', 'sapless', 'sappy', 'sarcoid', 'sarcous', 'sarky', 'sassy', 'sated', 'satem', 'saucy', 'saut', 'saving', 'savvy', 'scabby', 'scabrous', 'scaldic', 'scalelike', 'scalene', 'scalpless', 'scampish', 'scandent', 'scanty', 'scaphoid', 'scarcer', 'scarcest', 'scarless', 'scary', 'scatheless', 'scathing', 'scatty', 'scentless', 'sceptral', 'scheming', 'schistose', 'schizo', 'schizoid', 'schmaltzy', 'schmalzy', 'scientific', 'scincoid', 'scirrhoid', 'scirrhous', 'scissile', 'scleroid', 'sclerosed', 'sclerous', 'scombrid', 'scombroid', 'scopate', 'scornful', 'scraggly', 'scraggy', 'scrambled', 'scrannel', 'scrappy', 'scratchless', 'scratchy', 'scrawly', 'scrawny', 'screaky', 'screeching', 'screwy', 'scribal', 'scrimpy', 'scroddled', 'scroggy', 'scrotal', 'scrubbed', 'scrubby', 'scruffy', 'scrumptious', 'sculptured', 'scummy', 'scungy', 'scurrile', 'scurry', 'scurvy', 'scutate', 'seaboard', 'seaborne', 'seamless', 'seamy', 'searching', 'seasick', 'seatless', 'seaward', 'second', 'sectile', 'secund', 'secure', 'sedate', 'sedgy', 'seduced', 'seedless', 'seedy', 'seeing', 'seeking', 'seely', 'seeming', 'seemly', 'seismal', 'seismic', 'sejant', 'select', 'selfish', 'selfless', 'selfsame', 'semi', 'senile', 'sensate', 'senseless', 'septal', 'septate', 'sequent', 'sequined', 'seral', 'serene', 'serfish', 'serflike', 'serrate', 'serried', 'serviced', 'servo', 'setose', 'severe', 'sexism', 'sexist', 'sexless', 'sextan', 'sexy', 'shabby', 'shaded', 'shadeless', 'shadowed', 'shady', 'shaftless', 'shaken', 'shaky', 'shallow', 'shalwar', 'shamefaced', 'shameful', 'shameless', 'shapeless', 'shapely', 'shaping', 'shaven', 'shawlless', 'sheathy', 'sheepish', 'shellproof', 'shelly', 'shickered', 'shieldless', 'shieldlike', 'shier', 'shiest', 'shiftless', 'shifty', 'shingly', 'shining', 'shiny', 'shipboard', 'shipless', 'shipshape', 'shirtless', 'shirty', 'shocking', 'shoddy', 'shoeless', 'shopworn', 'shoreless', 'shoreward', 'shortcut', 'shortish', 'shorty', 'shotten', 'showy', 'shredded', 'shredless', 'shrewish', 'shrieval', 'shrinelike', 'shrouding', 'shroudless', 'shrubby', 'shrunken', 'shyer', 'shyest', 'sicker', 'sicklied', 'sickly', 'sideling', 'sidelong', 'sideward', 'sideways', 'sighful', 'sighted', 'sightless', 'sightly', 'sigmate', 'silenced', 'silken', 'silty', 'silvan', 'silvern', 'simplex', 'sincere', 'sinful', 'singing', 'singsong', 'sinless', 'sinning', 'sissy', 'sister', 'sixfold', 'sixteen', 'sixty', 'sizy', 'skaldic', 'sketchy', 'skewbald', 'skidproof', 'skilful', 'skillful', 'skimpy', 'skinking', 'skinless', 'skinny', 'skirtless', 'skittish', 'skyward', 'slaggy', 'slakeless', 'slangy', 'slantwise', 'slapstick', 'slashing', 'slaty', 'slavish', 'sleazy', 'sleekit', 'sleeky', 'sleepless', 'sleepwalk', 'sleepy', 'sleety', 'sleeveless', 'slender', 'slickered', 'slier', 'sliest', 'slighting', 'slimline', 'slimmer', 'slimmest', 'slimming', 'slimsy', 'slimy', 'slinky', 'slippy', 'slipshod', 'sloping', 'sloshy', 'slothful', 'slouchy', 'sloughy', 'sludgy', 'sluggard', 'sluggish', 'sluicing', 'slumbrous', 'slummy', 'slushy', 'sluttish', 'smacking', 'smallish', 'smarmy', 'smartish', 'smarty', 'smashing', 'smeary', 'smectic', 'smelly', 'smileless', 'smiling', 'smitten', 'smokeproof', 'smoking', 'smothered', 'smugger', 'smuggest', 'smutty', 'snafu', 'snaggy', 'snakelike', 'snaky', 'snappish', 'snappy', 'snarly', 'snatchy', 'snazzy', 'sneaking', 'sneaky', 'snider', 'snidest', 'sniffy', 'snippy', 'snobbish', 'snoopy', 'snooty', 'snoozy', 'snoring', 'snotty', 'snouted', 'snowless', 'snowlike', 'snubby', 'snuffly', 'snuffy', 'snugger', 'snuggest', 'snugging', 'soapless', 'soapy', 'soaring', 'sober', 'socko', 'sodden', 'softish', 'softwood', 'soggy', 'sola', 'solemn', 'soli', 'sollar', 'solus', 'solute', 'solvent', 'somber', 'sombre', 'sombrous', 'sometime', 'sonant', 'songful', 'songless', 'sonless', 'sonsie', 'sonsy', 'soothfast', 'soothing', 'sopping', 'soppy', 'sordid', 'sorer', 'sorest', 'sorry', 'sotted', 'sottish', 'soulful', 'soulless', 'soundless', 'soundproof', 'soupy', 'sourish', 'southmost', 'southpaw', 'southward', 'sovran', 'sozzled', 'spaceless', 'spacial', 'spacious', 'spadelike', 'spangly', 'spanking', 'sparid', 'sparing', 'sparkless', 'sparkling', 'sparoid', 'sparry', 'sparser', 'sparsest', 'spastic', 'spathic', 'spathose', 'spatial', 'spavined', 'specious', 'speckled', 'speckless', 'speechless', 'speedful', 'speeding', 'speedless', 'speedy', 'spellbound', 'spendthrift', 'spermic', 'spermous', 'sphagnous', 'sphenic', 'spheral', 'sphereless', 'spherelike', 'spheric', 'sphery', 'sphygmic', 'sphygmoid', 'spicate', 'spicy', 'spiffing', 'spiffy', 'spiky', 'spindling', 'spindly', 'spineless', 'spinose', 'spinous', 'spiral', 'spirant', 'spireless', 'spiroid', 'spiry', 'spiteful', 'splanchnic', 'splashy', 'spleenful', 'spleenish', 'spleeny', 'splendent', 'splendid', 'splendrous', 'splenic', 'splitting', 'splurgy', 'spoken', 'spokewise', 'spongy', 'spooky', 'spoony', 'sportful', 'sportive', 'sportless', 'sporty', 'spotless', 'spotty', 'spousal', 'spouseless', 'spouted', 'spoutless', 'spriggy', 'sprightful', 'sprightly', 'springing', 'springless', 'springlike', 'springtime', 'springy', 'sprucer', 'sprucest', 'sprucing', 'spryer', 'spryest', 'spunky', 'spurless', 'squabby', 'squalid', 'squally', 'squamate', 'squamous', 'squarish', 'squarrose', 'squashy', 'squeaky', 'squeamish', 'squiffy', 'squiggly', 'squirmy', 'squirting', 'squishy', 'stabbing', 'stabile', 'stagey', 'stagnant', 'stagy', 'stalkless', 'stalky', 'stalwart', 'stalworth', 'stannous', 'staple', 'starboard', 'starchy', 'staring', 'starless', 'starlight', 'starlike', 'starring', 'starry', 'starveling', 'starving', 'statant', 'stated', 'stateless', 'stateside', 'statewide', 'statist', 'stative', 'statued', 'steadfast', 'stealthy', 'steamtight', 'steamy', 'stedfast', 'steepled', 'stelar', 'stellar', 'stellate', 'stemless', 'stenosed', 'stepwise', 'steric', 'sterile', 'sternal', 'sternmost', 'sthenic', 'stickit', 'stiffish', 'stifling', 'stilly', 'stilted', 'stingless', 'stingy', 'stinko', 'stintless', 'stirless', 'stirring', 'stockinged', 'stockish', 'stockless', 'stocky', 'stodgy', 'stolen', 'stolid', 'stoneground', 'stoneless', 'stoneware', 'stonkered', 'stopless', 'stopping', 'store', 'storeyed', 'storied', 'stormbound', 'stormless', 'stormproof', 'stotious', 'stoutish', 'straining', 'strangest', 'strapless', 'strapping', 'stratous', 'strawless', 'strawlike', 'streaky', 'streaming', 'streamless', 'streamlined', 'streamy', 'stressful', 'stretchy', 'striate', 'stricken', 'strident', 'strifeful', 'strifeless', 'strigose', 'stringent', 'stringless', 'stringy', 'stripeless', 'stripy', 'strobic', 'strongish', 'strophic', 'stroppy', 'structured', 'strutting', 'strychnic', 'stubbled', 'stubbly', 'stubborn', 'stubby', 'studied', 'stuffy', 'stumbling', 'stumpy', 'stunning', 'stupid', 'sturdied', 'sturdy', 'stutter', 'stylar', 'styleless', 'stylised', 'stylish', 'stylized', 'styloid', 'subdued', 'subfusc', 'subgrade', 'sublimed', 'submerged', 'submersed', 'submiss', 'subscribed', 'subscript', 'subtile', 'subtle', 'succinct', 'suchlike', 'suffused', 'sugared', 'suited', 'sulcate', 'sulfa', 'sulkies', 'sulky', 'sullen', 'sullied', 'sultry', 'sunbaked', 'sunbeamed', 'sunburnt', 'sunfast', 'sunken', 'sunless', 'sunlike', 'sunlit', 'sunproof', 'sunrise', 'sunset', 'sunward', 'super', 'superb', 'supine', 'supple', 'supposed', 'sural', 'surbased', 'surer', 'surest', 'surfy', 'surgeless', 'surging', 'surgy', 'surly', 'surpliced', 'surplus', 'surprised', 'suspect', 'svelter', 'sveltest', 'swainish', 'swampy', 'swanky', 'swaraj', 'swarthy', 'sweated', 'sweaty', 'sweeping', 'sweetmeal', 'swelling', 'sweptwing', 'swindled', 'swingeing', 'swinish', 'swirly', 'swishy', 'swordless', 'swordlike', 'sylphic', 'sylphid', 'sylphish', 'sylphy', 'sylvan', 'systemless', 'taboo', 'tabu', 'tacit', 'tacky', 'tactful', 'tactile', 'tactless', 'tailing', 'tailless', 'taillike', 'tailored', 'taintless', 'taken', 'taking', 'talcose', 'talking', 'talky', 'taloned', 'tameless', 'tamer', 'tamest', 'taming', 'tandem', 'tangier', 'tangled', 'tangy', 'tannic', 'tapeless', 'tapelike', 'tardy', 'tarmac', 'tarnal', 'tarot', 'tarry', 'tarsal', 'tartish', 'tasseled', 'tasselled', 'tasteful', 'tasteless', 'tasty', 'tattered', 'tatty', 'taurine', 'tawdry', 'tawie', 'tearful', 'tearing', 'tearless', 'teary', 'teasing', 'techy', 'teeming', 'teenage', 'teensy', 'teeny', 'telic', 'telling', 'telltale', 'tempered', 'templed', 'tempting', 'tender', 'tenfold', 'tenor', 'tenseless', 'tenser', 'tensest', 'tensing', 'tensive', 'tented', 'tentie', 'tentless', 'tenty', 'tepid', 'terbic', 'terete', 'tergal', 'termless', 'ternate', 'terrene', 'tertial', 'tertian', 'testate', 'testy', 'tetchy', 'textbook', 'textile', 'textless', 'textured', 'thallic', 'thalloid', 'thallous', 'thankful', 'thankless', 'thatchless', 'thecal', 'thecate', 'theism', 'theist', 'themeless', 'thenar', 'thermic', 'theroid', 'thetic', 'thickset', 'thievish', 'thinking', 'thinnish', 'thirdstream', 'thirstless', 'thirsty', 'thirteen', 'thistly', 'thornless', 'thorny', 'thoughtful', 'thoughtless', 'thousandth', 'thowless', 'thrashing', 'threadbare', 'threadlike', 'thready', 'threatful', 'threefold', 'threescore', 'thriftless', 'thrifty', 'thrilling', 'throaty', 'throbbing', 'throbless', 'throneless', 'throwback', 'thudding', 'thuggish', 'thumbless', 'thumblike', 'thumping', 'thymic', 'thymy', 'thyrsoid', 'ticklish', 'tiddly', 'tideless', 'tidied', 'tightknit', 'timbered', 'timeless', 'timely', 'timeous', 'timid', 'tingly', 'tinhorn', 'tinkling', 'tinkly', 'tinny', 'tinsel', 'tintless', 'tiny', 'tippy', 'tiptoe', 'tiptop', 'tireless', 'tiresome', 'titled', 'toeless', 'toey', 'togaed', 'togate', 'toilful', 'toilsome', 'tombless', 'tonal', 'toneless', 'tongueless', 'tonguelike', 'tonish', 'tonnish', 'tony', 'toothless', 'toothlike', 'toothsome', 'toothy', 'topfull', 'topless', 'topmost', 'torose', 'torpid', 'torquate', 'torrent', 'tortile', 'tortious', 'tortured', 'tother', 'touching', 'touchy', 'toughish', 'touring', 'tourist', 'toward', 'towered', 'townish', 'townless', 'towy', 'toxic', 'toyless', 'toylike', 'traceless', 'trackless', 'tractile', 'tractrix', 'trainless', 'tranquil', 'transcribed', 'transient', 'transposed', 'traplike', 'trappy', 'trashy', 'traveled', 'travelled', 'traverse', 'treacly', 'treasured', 'treen', 'trembling', 'trembly', 'trenchant', 'trendy', 'tressured', 'tressy', 'tribal', 'tribeless', 'trichoid', 'trickish', 'trickless', 'tricksome', 'tricksy', 'tricky', 'tricorn', 'trident', 'trifid', 'trifling', 'triform', 'trillion', 'trillionth', 'trilobed', 'trinal', 'triploid', 'trippant', 'tripping', 'tristful', 'triter', 'tritest', 'triune', 'trivalve', 'trochal', 'trochoid', 'trodden', 'trophic', 'trophied', 'tropic', 'troppo', 'trothless', 'troublous', 'truant', 'truceless', 'truer', 'truffled', 'truncate', 'trunnioned', 'trustful', 'trusting', 'trustless', 'trusty', 'truthful', 'truthless', 'tryptic', 'tsarism', 'tsarist', 'tubal', 'tubate', 'tubby', 'tubeless', 'tumbling', 'tumid', 'tuneful', 'tuneless', 'turbaned', 'turbid', 'turdine', 'turfy', 'turgent', 'turgid', 'tuskless', 'tussal', 'tussive', 'tutti', 'twaddly', 'tweedy', 'twelvefold', 'twenty', 'twiggy', 'twinkling', 'twinning', 'twofold', 'typal', 'typhous', 'typic', 'ugsome', 'ullaged', 'umber', 'umbral', 'umbrose', 'umpteen', 'umpteenth', 'unaimed', 'unaired', 'unapt', 'unarmed', 'unasked', 'unawed', 'unbacked', 'unbagged', 'unbaked', 'unbarbed', 'unbarred', 'unbathed', 'unbegged', 'unbent', 'unbid', 'unblamed', 'unbleached', 'unblenched', 'unblent', 'unblessed', 'unblocked', 'unblown', 'unboned', 'unborn', 'unborne', 'unbought', 'unbound', 'unbowed', 'unbraced', 'unbranched', 'unbreached', 'unbreathed', 'unbred', 'unbreeched', 'unbridged', 'unbroke', 'unbruised', 'unbrushed', 'unburned', 'unburnt', 'uncaged', 'uncalled', 'uncapped', 'uncashed', 'uncaught', 'uncaused', 'unchained', 'unchanged', 'uncharge', 'uncharged', 'uncharmed', 'unchaste', 'unchecked', 'uncheered', 'unchewed', 'unclad', 'unclaimed', 'unclassed', 'unclean', 'uncleaned', 'uncleansed', 'unclear', 'uncleared', 'unclimbed', 'unclipped', 'unclogged', 'unclutched', 'uncocked', 'uncoined', 'uncombed', 'uncooked', 'uncouth', 'uncropped', 'uncross', 'uncrowned', 'unculled', 'uncurbed', 'uncured', 'uncursed', 'uncurved', 'uncut', 'undamped', 'undeaf', 'undealt', 'undecked', 'undimmed', 'undipped', 'undocked', 'undone', 'undrained', 'undraped', 'undrawn', 'undreamed', 'undreamt', 'undress', 'undressed', 'undried', 'undrilled', 'undrowned', 'undrunk', 'undubbed', 'undue', 'undug', 'undulled', 'undyed', 'unfair', 'unfanned', 'unfeared', 'unfed', 'unfelled', 'unfelt', 'unfenced', 'unfiled', 'unfilled', 'unfilmed', 'unfine', 'unfired', 'unfirm', 'unfished', 'unfit', 'unflawed', 'unfledged', 'unflushed', 'unfooled', 'unforced', 'unforged', 'unformed', 'unfought', 'unfound', 'unframed', 'unfraught', 'unfree', 'unfunded', 'unfurred', 'ungalled', 'ungauged', 'ungeared', 'ungilt', 'ungirthed', 'unglad', 'unglazed', 'unglossed', 'ungloved', 'ungored', 'ungorged', 'ungowned', 'ungraced', 'ungrassed', 'ungrazed', 'ungroomed', 'unground', 'ungrown', 'ungrudged', 'ungual', 'unguessed', 'unguled', 'ungummed', 'ungyved', 'unhacked', 'unhailed', 'unhanged', 'unharmed', 'unhatched', 'unhealed', 'unheard', 'unhelped', 'unhewn', 'unhinged', 'unhired', 'unhooped', 'unhorsed', 'unhung', 'unhurt', 'unhusked', 'unique', 'unjust', 'unkempt', 'unkenned', 'unkept', 'unkind', 'unkinged', 'unkissed', 'unknelled', 'unlaid', 'unlearned', 'unlearnt', 'unleased', 'unled', 'unlet', 'unlike', 'unlimed', 'unlined', 'unlit', 'unlooked', 'unlopped', 'unlost', 'unloved', 'unmade', 'unmailed', 'unmaimed', 'unmanned', 'unmarked', 'unmarred', 'unmasked', 'unmatched', 'unmeant', 'unmeet', 'unmet', 'unmilked', 'unmilled', 'unmissed', 'unmixed', 'unmoaned', 'unmourned', 'unmoved', 'unmown', 'unnamed', 'unoiled', 'unowned', 'unpaced', 'unpaged', 'unpaid', 'unpained', 'unpaired', 'unpared', 'unpaved', 'unpeeled', 'unpent', 'unperched', 'unpicked', 'unpierced', 'unplaced', 'unplagued', 'unplanked', 'unplayed', 'unpleased', 'unpledged', 'unploughed', 'unplucked', 'unplumb', 'unplumbed', 'unplumed', 'unpoised', 'unpolled', 'unposed', 'unpraised', 'unpreached', 'unpressed', 'unpriced', 'unprimed', 'unprized', 'unpropped', 'unproved', 'unpruned', 'unpurged', 'unquelled', 'unquenched', 'unraised', 'unraked', 'unreached', 'unread', 'unreaped', 'unreined', 'unrent', 'unrhymed', 'unribbed', 'unrigged', 'unrimed', 'unripe', 'unroped', 'unrouged', 'unroused', 'unrubbed', 'unrude', 'unruled', 'unsafe', 'unsaid', 'unsailed', 'unsapped', 'unsashed', 'unsaved', 'unscaled', 'unscanned', 'unscarred', 'unscathed', 'unschooled', 'unscorched', 'unscoured', 'unscratched', 'unscreened', 'unsealed', 'unsearched', 'unseen', 'unseized', 'unsensed', 'unsent', 'unset', 'unshamed', 'unshaped', 'unshared', 'unshaved', 'unsheathed', 'unshed', 'unshipped', 'unshocked', 'unshod', 'unshoed', 'unshorn', 'unshown', 'unshrived', 'unshunned', 'unshut', 'unsight', 'unsigned', 'unsized', 'unskilled', 'unskimmed', 'unskinned', 'unslain', 'unsliced', 'unsluiced', 'unslung', 'unsmirched', 'unsmooth', 'unsmoothed', 'unsnuffed', 'unsoaped', 'unsoft', 'unsoiled', 'unsold', 'unsolved', 'unsought', 'unsound', 'unsown', 'unspared', 'unsparred', 'unspelled', 'unspent', 'unspied', 'unspilled', 'unspilt', 'unspoiled', 'unspoilt', 'unsprung', 'unspun', 'unsquared', 'unstack', 'unstacked', 'unstaid', 'unstained', 'unstamped', 'unstarched', 'unstilled', 'unstirred', 'unstitched', 'unstocked', 'unstopped', 'unstrained', 'unstreamed', 'unstressed', 'unstringed', 'unstriped', 'unstripped', 'unstrung', 'unstuck', 'unstuffed', 'unsucked', 'unsung', 'unsure', 'unswayed', 'unswept', 'unsworn', 'untailed', 'untame', 'untamed', 'untanned', 'untapped', 'untarred', 'untaught', 'unteamed', 'unthanked', 'unthawed', 'unthought', 'untied', 'untiled', 'untilled', 'untinged', 'untinned', 'untired', 'untold', 'untombed', 'untoned', 'untorn', 'untouched', 'untraced', 'untracked', 'untrained', 'untrenched', 'untressed', 'untried', 'untrimmed', 'untrod', 'untrue', 'unturfed', 'unturned', 'unurged', 'unused', 'unversed', 'unvexed', 'unviewed', 'unvoiced', 'unwaked', 'unwarmed', 'unwarned', 'unwarped', 'unwashed', 'unwatched', 'unweaned', 'unwebbed', 'unwed', 'unweened', 'unweighed', 'unwell', 'unwept', 'unwet', 'unwhipped', 'unwilled', 'unwinged', 'unwiped', 'unwired', 'unwise', 'unwished', 'unwitched', 'unwon', 'unwooed', 'unworked', 'unworn', 'unwound', 'unwrapped', 'unwrought', 'unwrung', 'upbeat', 'upbound', 'upcast', 'upgrade', 'uphill', 'upmost', 'uppish', 'upraised', 'upset', 'upstage', 'upstaged', 'upstair', 'upstairs', 'upstart', 'upstate', 'upstream', 'uptight', 'uptown', 'upturned', 'upward', 'upwind', 'urbane', 'urdy', 'urgent', 'urnfield', 'useful', 'useless', 'utile', 'utmost', 'vadose', 'vagal', 'vagrant', 'vagrom', 'vaguer', 'vaguest', 'valanced', 'valgus', 'valiant', 'valid', 'valval', 'valvar', 'valvate', 'vambraced', 'vaneless', 'vanward', 'vapid', 'varied', 'varus', 'vassal', 'vasty', 'vatic', 'vaulted', 'vaulting', 'vaunted', 'vaunting', 'vaunty', 'veilless', 'veiny', 'velar', 'velate', 'vellum', 'venal', 'vengeful', 'venose', 'venous', 'ventose', 'verbless', 'verbose', 'verdant', 'verism', 'verist', 'vespine', 'vestral', 'vibrant', 'viceless', 'viewless', 'viewy', 'villose', 'villous', 'vinous', 'viral', 'virgate', 'virile', 'visaged', 'viscid', 'viscose', 'viscous', 'vitric', 'vivid', 'vivo', 'vixen', 'voetstoots', 'vogie', 'voiceful', 'voiceless', 'voided', 'volant', 'volar', 'volumed', 'volvate', 'vorant', 'voteless', 'votive', 'vulpine', 'vying', 'wacky', 'wageless', 'waggish', 'waggly', 'wailful', 'wailing', 'waisted', 'wakeful', 'wakeless', 'wakerife', 'waking', 'walnut', 'wambly', 'wandle', 'waney', 'waning', 'wanner', 'wannest', 'wanning', 'wannish', 'wanting', 'wanton', 'warded', 'warlike', 'warming', 'warmish', 'warning', 'warring', 'wartless', 'wartlike', 'warty', 'wary', 'washy', 'waspish', 'waspy', 'wasted', 'wasteful', 'watchful', 'waveless', 'wavelike', 'waving', 'wavy', 'waxen', 'waxing', 'waxy', 'wayless', 'wayward', 'wayworn', 'weakly', 'weaponed', 'wearied', 'wearing', 'wearish', 'weary', 'weathered', 'webby', 'wedded', 'wedgy', 'weedy', 'weekday', 'weekly', 'weeny', 'weepy', 'weer', 'weest', 'weighted', 'weighty', 'welcome', 'weldless', 'westbound', 'western', 'wetter', 'wettish', 'whacking', 'whacky', 'whapping', "whate'er", 'wheaten', 'wheezing', 'wheezy', 'wheyey', 'whilom', 'whining', 'whinny', 'whiny', 'whiplike', 'whirring', 'whiskered', 'whitish', 'whittling', 'whity', 'wholesale', 'wholesome', 'whopping', 'whoreson', 'whorish', 'wicked', 'wicker', 'wider', 'widespread', 'widest', 'widish', 'wieldy', 'wifeless', 'wifely', 'wiggly', 'wigless', 'wiglike', 'wilful', 'willful', 'willing', 'willyard', 'wily', 'wimpy', 'windburned', 'winded', 'windproof', 'windswept', 'windy', 'wingless', 'winglike', 'wintry', 'winy', 'wiretap', 'wiring', 'wiry', 'wiser', 'wisest', 'wising', 'wispy', 'wistful', 'witchy', 'withdrawn', 'withy', 'witless', 'witted', 'witting', 'witty', 'wizard', 'wizen', 'wizened', 'woaded', 'wobbling', 'woeful', 'woesome', 'wolfish', 'wonky', 'wonted', 'wooded', 'woodless', 'woodsy', 'woodwind', 'woolen', 'woollen', 'woozier', 'woozy', 'wordless', 'wordy', 'workless', 'worldly', 'worldwide', 'wormy', 'worried', 'worser', 'worshipped', 'worthless', 'worthwhile', 'worthy', 'wounded', 'woundless', 'woven', 'wrapround', 'wrathful', 'wrathless', 'wreathless', 'wreckful', 'wretched', 'wrier', 'wriest', 'wriggly', 'wrinkly', 'writhen', 'writhing', 'written', 'wrongful', 'xanthous', 'xerarch', 'xeric', 'xiphoid', 'xylic', 'xyloid', 'yarer', 'yarest', 'yawning', 'yclept', 'yearling', 'yearlong', 'yearly', 'yearning', 'yeastlike', 'yeasty', 'yester', 'yestern', 'yielding', 'yogic', 'yolky', 'yonder', 'younger', 'youthful', 'yttric', 'yuletide', 'zany', 'zealous', 'zebrine', 'zeroth', 'zestful', 'zesty', 'zigzag', 'zillion', 'zincky', 'zincoid', 'zincous', 'zincy', 'zingy', 'zinky', 'zippy', 'zonate', 'zoning']
