# Supplementary material
Source: ML conference proceedings conference paper supplement (https://proceedings.neurips.cc/paper_files/paper/2022/hash/331c41353b053683e17f7c88a797701d-Abstract.html)
Supplement: Supplementary file 1 [file 331c41353b053683e17f7c88a797701d-Supplemental-Conference.zip › supp/code_release/mazes/deep-thinking-main/deepthinking/data_analysis/make_schoop.py]

import argparse
from datetime import datetime

import numpy as np
import seaborn as sns
from matplotlib import pyplot as plt

from make_table import get_table

def get_schoopy_plot(table, error_bars=True):
    fig, ax = plt.subplots(figsize=(20, 9))

    models = set(table.model)
    test_datas = set(table.test_data)
    alphas = set(table.alpha)

    sns.lineplot(data=table,
                 x="test_iter",
                 y="test_acc_mean",
                 hue="model",
                 size="alpha",
                 sizes=(2, 8),
                 style="test_data" if len(test_datas) > 1 else None,
                 palette="dark",
                 dashes=True,
                 units=None,
                 legend="auto",
                 ax=ax)

    if error_bars and "test_acc_sem" in table.keys():
        for model in models:
            for test_data in test_datas:
                for alpha in alphas:
                    data = table[(table.model == model) &
                                 (table.test_data == test_data) &
                                 (table.alpha == alpha)]
                    plt.fill_between(data.test_iter,
                                     data.test_acc_mean - data.test_acc_sem,
                                     data.test_acc_mean + data.test_acc_sem,
                                     alpha=0.1, color="k")

    tr = table.max_iters.max()  # training regime number
    ax.fill_between([0, tr], [105, 105], alpha=0.3, label="Training Regime")
    return ax


def main():
    parser = argparse.ArgumentParser(description="Analysis parser")
    parser.add_argument("--alpha_list", type=float, nargs="+", default=None,
                        help="only plot models with alphas in given list")
    parser.add_argument("filepath", type=str)
    parser.add_argument("--filter", type=float, default=None,
                        help="cutoff for filtering by training acc?")
    parser.add_argument("--plot_name", type=str, default=None, help="where to save image?")
    parser.add_argument("--max_iters_list", type=int, nargs="+", default=None,
                        help="only plot models with max iters in given list")
    parser.add_argument("--model_list", type=str, nargs="+", default=None,
                        help="only plot models with model name in given list")
    parser.add_argument("--width_list", type=str, nargs="+", default=None,
                        help="only plot models with widths in given list")
    parser.add_argument("--max", action="store_true", help="add max values to table?")
    parser.add_argument("--min", action="store_true", help="add min values too table?")
    parser.add_argument("--xlim", type=float, nargs="+", default=None, help="x limits for plotting")
    parser.add_argument("--ylim", type=float, nargs="+", default=None, help="y limits for plotting")
    args = parser.parse_args()

    if args.plot_name is None:
        now = datetime.now().strftime("%m%d-%H.%M")
        args.plot_name = f"schoop{now}.png"
        plot_title = "Schoopy Plot"
    else:
        plot_title = args.plot_name[:-4]

    # get table of results
    table = get_table(args.filepath,
                      args.max,
                      args.min,
                      filter_at=args.filter,
                      max_iters_list=args.max_iters_list,
                      alpha_list=args.alpha_list,
                      width_list=args.width_list,
                      model_list=args.model_list)

    # reformat and reindex table for plotting purposes
    table.columns = table.columns.map("_".join)
    table.columns.name = None
    table = table.reset_index()
    print(table.round(2).to_markdown())
    ax = get_schoopy_plot(table)

    ax.legend(fontsize=26, loc="upper left", bbox_to_anchor=(1.0, 0.8))
    x_max = table.test_iter.max()
    x = np.arange(20, x_max + 1, 10 if (x_max <= 100) else 100)
    ax.tick_params(axis="y", labelsize=34)
    ax.set_xticks(x)
    ax.set_xticklabels(x, fontsize=34, rotation=37)
    if args.xlim is None:
        ax.set_xlim([x.min() - 0.5, x.max() + 0.5])
    else:
        ax.set_xlim(args.xlim)
    if args.ylim is None:
        ax.set_ylim([0, 103])
    else:
        ax.set_ylim(args.ylim)
    ax.set_xlabel("Test-Time Iterations", fontsize=34)
    ax.set_ylabel("Accuracy (%)", fontsize=34)
    ax.set_title(plot_title, fontsize=34)
    ax.spines["right"].set_visible(False)
    ax.spines["top"].set_visible(False)
    plt.tight_layout()

    plt.savefig(args.plot_name)
    # plt.show()


if __name__ == "__main__":
    main()
