# Supplementary material
Source: ML conference proceedings conference paper supplement (https://proceedings.neurips.cc/paper_files/paper/2022/hash/331c41353b053683e17f7c88a797701d-Abstract.html)
Supplement: Supplementary file 1 [file 331c41353b053683e17f7c88a797701d-Supplemental-Conference.zip › supp/code_release/mazes/deep-thinking-main/deepthinking/data_analysis/make_table.py]

import argparse
import copy
import glob
import json

import pandas as pd


def get_little_df_from_one_run(data_dict):
    num_new_dicts = len(data_dict["test_iters"])
    test_iters = data_dict["test_iters"]
    out_dict = {}
    for i in range(num_new_dicts):
        new_dict_i = copy.deepcopy(data_dict)
        new_dict_i["test_acc"] = data_dict["test_acc"][str(test_iters[i])] \
            if data_dict["test_acc"] else 0
        new_dict_i["val_acc"] = data_dict["val_acc"][str(test_iters[i])] \
            if data_dict["val_acc"] else 0
        new_dict_i["train_acc"] = data_dict["train_acc"][str(test_iters[i])] \
            if data_dict["train_acc"] else 0
        new_dict_i["test_iter"] = test_iters[i]
        out_dict[i] = new_dict_i
    little_df = pd.DataFrame.from_dict(out_dict, orient="index")
    return little_df


def get_df(filepath, acc_filter):
    pd.set_option("display.max_rows", None)
    df = pd.DataFrame()
    num_checkpoints = 0
    for f_name in glob.iglob(f"{filepath}/**/*testing*/stats.json", recursive=True):
        num_checkpoints += 1
        with open(f_name, "r") as fp:
            data = json.load(fp)
        if acc_filter is not None:
            m = data["max_iters"]
            if data["train_acc"][str(m)] > acc_filter:
                df = df.append(get_little_df_from_one_run(data))
        else:
            df = df.append(get_little_df_from_one_run(data))
    num_trained = len(df)
    return df, num_checkpoints, num_trained


def get_table(filepath, disp_max, disp_min, filter_at=None, max_iters_list=None,
              alpha_list=None, width_list=None, model_list=None):
    pd.set_option("display.max_rows", None)
    df, num_checkpoints, num_trained = get_df(filepath, filter_at)
    df["count"] = 1

    if max_iters_list:
        frames = []
        for max_iters in max_iters_list:
            frames.append(df[df["max_iters"] == int(max_iters)])
        df = pd.concat(frames)
    if alpha_list:
        frames = []
        for alpha in alpha_list:
            frames.append(df[df["alpha"] == float(alpha)])
        df = pd.concat(frames)
    if width_list:
        frames = []
        for width in width_list:
            frames.append(df[df["model"].str.contains(str(width))])
        df = pd.concat(frames)
    if model_list:
        frames = []
        for model in model_list:
            frames.append(df[df["model"].str.contains(model)])
        df = pd.concat(frames)

    # df = df[df.model_path.str.contains("best")]
    index = ["model", "test_data", "max_iters", "alpha", "test_mode", "test_iter"]

    values = ["mean", "sem"]
    if disp_max:
        values.append("max")
    if disp_min:
        values.append("min")
    df.drop_duplicates(subset=["model_path", "test_iter", "test_data", "test_mode"], inplace=True)
    try:
        table = pd.pivot_table(df, index=index, aggfunc={"train_acc": values,
                                                         "val_acc": values,
                                                         "test_acc": values,
                                                         "count": "count"})
    except:
        raise KeyError("No data in the table. Check the path to test results. "
                       "Possibly, there are no results from models that trained "
                       "with accuracy above the filter value.")
    return table


def main():
    parser = argparse.ArgumentParser(description="Analysis parser")
    parser.add_argument("filepath", type=str)
    parser.add_argument("--filter", type=float, default=None,
                        help="cutoff for filtering by training acc?")
    parser.add_argument("--max_iters_list", type=int, nargs="+", default=None,
                        help="only plot models with max iters in given list")
    parser.add_argument("--model_list", type=str, nargs="+", default=None,
                        help="only plot models with model name in given list")
    parser.add_argument("--width_list", type=str, nargs="+", default=None,
                        help="only plot models with widths in given list")
    parser.add_argument("--alpha_list", type=float, nargs="+", default=None,
                        help="only plot models with alphas in given list")
    parser.add_argument("--max", action="store_true", help="add max values to table?")
    parser.add_argument("--min", action="store_true", help="add min values too table?")
    parser.add_argument("--save_name", type=str, default=None, help="add min values too table?")

    args = parser.parse_args()
    table = get_table(args.filepath,
                      args.max,
                      args.min,
                      filter_at=args.filter,
                      max_iters_list=args.max_iters_list,
                      alpha_list=args.alpha_list,
                      width_list=args.width_list,
                      model_list=args.model_list)

    table = table.round(3)
    print(table.to_markdown())

    if args.save_name is not None:
        table.to_csv(args.save_name)


if __name__ == "__main__":
    main()
