# Supplementary material
Source: ML conference proceedings conference paper supplement (https://proceedings.neurips.cc/paper_files/paper/2022/hash/331c41353b053683e17f7c88a797701d-Abstract.html)
Supplement: Supplementary file 1 [file 331c41353b053683e17f7c88a797701d-Supplemental-Conference.zip › supp/code_release/mazes/deep-thinking-main/deepthinking/data_analysis/parse_training_runs.py]

import argparse
import glob
import json
import os.path

from omegaconf import OmegaConf
from tabulate import tabulate


def get_trained_checkpoints(filepath, acc_filter, model_list, alpha_list):
    checkpoints = []
    num_checkpoints = 0
    num_trained = 0
    for f_name in glob.iglob(f"{filepath}/**/*training*/stats.json", recursive=True):
        with open(f_name, "r") as fp:
            data = json.load(fp)

        m = data["max_iters"]
        model_path = "/".join(f_name.split("/")[1:-1])
        cfg_name = os.path.join("/".join(f_name.split("/")[:-1]), ".hydra/config.yaml")
        cfg = OmegaConf.load(cfg_name)
        if model_list is None or cfg.problem.model.model in model_list:
            if alpha_list is None or cfg.problem.hyp.alpha in alpha_list:
                if data["train_acc"][str(m)] > acc_filter:
                    checkpoints.append((model_path,
                                        cfg.problem.model.model,
                                        cfg.problem.hyp.alpha,
                                        data["train_acc"][str(m)]))
                    num_trained += 1
                num_checkpoints += 1
    return checkpoints, num_trained, num_checkpoints


def main():
    parser = argparse.ArgumentParser(description="Analysis parser")
    parser.add_argument("filepath", type=str)
    parser.add_argument("--alpha_list", type=float, nargs="+", default=None,
                        help="only plot models with model name in given list")
    parser.add_argument("--filter", type=float, default=0,
                        help="cutoff for filtering by training acc?")
    parser.add_argument("--model_list", type=str, nargs="+", default=None,
                        help="only plot models with model name in given list")
    args = parser.parse_args()
    checkpoints, num_trained, num_checkopints = get_trained_checkpoints(args.filepath,
                                                                        args.filter,
                                                                        args.model_list,
                                                                        args.alpha_list)
    head = ["Model Path",  "Model", "Alpha", "Training Acc"]

    print(f"In total, {num_checkopints} models are saved")
    print(f"Of those, {num_trained} trained, with training accuracy higher than {args.filter}")
    print(tabulate(checkpoints, headers=head))
    print("")
    print("Checkpoint directories in copy-pastable form:")
    for c in checkpoints:
        print(c[0])


if __name__ == "__main__":
    main()
