# Supplementary material
Source: ML conference proceedings conference paper supplement (https://proceedings.neurips.cc/paper_files/paper/2022/hash/331c41353b053683e17f7c88a797701d-Abstract.html)
Supplement: Supplementary file 1 [file 331c41353b053683e17f7c88a797701d-Supplemental-Conference.zip › supp/code_release/mazes/deep-thinking-main/deepthinking/lib/solvers.py]

# Modified based on the DEQ repo.

import torch
import torch.nn.functional as functional
from torch.autograd import Function
import numpy as np 
import pickle
import sys
import os
from scipy.optimize import root
import time
from termcolor import colored

#### From DEQ repository

def _safe_norm(v):
    if not torch.isfinite(v).all():
        return np.inf
    return torch.norm(v)

def scalar_search_armijo(phi, phi0, derphi0, c1=1e-4, alpha0=1, amin=0):
    ite = 0
    phi_a0 = phi(alpha0)    # First do an update with step size 1
    if phi_a0 <= phi0 + c1*alpha0*derphi0:
        return alpha0, phi_a0, ite

    # Otherwise, compute the minimizer of a quadratic interpolant
    alpha1 = -(derphi0) * alpha0**2 / 2.0 / (phi_a0 - phi0 - derphi0 * alpha0)
    phi_a1 = phi(alpha1)

    # Otherwise loop with cubic interpolation until we find an alpha which
    # satisfies the first Wolfe condition (since we are backtracking, we will
    # assume that the value of alpha is not too small and satisfies the second
    # condition.
    while alpha1 > amin:       # we are assuming alpha>0 is a descent direction
        factor = alpha0**2 * alpha1**2 * (alpha1-alpha0)
        a = alpha0**2 * (phi_a1 - phi0 - derphi0*alpha1) - \
            alpha1**2 * (phi_a0 - phi0 - derphi0*alpha0)
        a = a / factor
        b = -alpha0**3 * (phi_a1 - phi0 - derphi0*alpha1) + \
            alpha1**3 * (phi_a0 - phi0 - derphi0*alpha0)
        b = b / factor

        alpha2 = (-b + torch.sqrt(torch.abs(b**2 - 3 * a * derphi0))) / (3.0*a)
        phi_a2 = phi(alpha2)
        ite += 1

        if (phi_a2 <= phi0 + c1*alpha2*derphi0):
            return alpha2, phi_a2, ite

        if (alpha1 - alpha2) > alpha1 / 2.0 or (1 - alpha2/alpha1) < 0.96:
            alpha2 = alpha1 / 2.0

        alpha0 = alpha1
        alpha1 = alpha2
        phi_a0 = phi_a1
        phi_a1 = phi_a2

    # Failed to find a suitable step length
    return None, phi_a1, ite


def line_search(update, x0, g0, g, nstep=0, on=True):
    """
    `update` is the propsoed direction of update.

    Code adapted from scipy.
    """
    tmp_s = [0]
    tmp_g0 = [g0]
    tmp_phi = [torch.norm(g0)**2]
    s_norm = torch.norm(x0) / torch.norm(update)

    def phi(s, store=True):
        if s == tmp_s[0]:
            return tmp_phi[0]    # If the step size is so small... just return something
        x_est = x0 + s * update
        g0_new = g(x_est)
        phi_new = _safe_norm(g0_new)**2
        if store:
            tmp_s[0] = s
            tmp_g0[0] = g0_new
            tmp_phi[0] = phi_new
        return phi_new
    
    if on:
        s, phi1, ite = scalar_search_armijo(phi, tmp_phi[0], -tmp_phi[0], amin=1e-2)
    if (not on) or s is None:
        s = 1.0
        ite = 0

    x_est = x0 + s * update
    if s == tmp_s[0]:
        g0_new = tmp_g0[0]
    else:
        g0_new = g(x_est)
    return x_est, g0_new, x_est - x0, g0_new - g0, ite

def rmatvec(part_Us, part_VTs, x):
    # Compute x^T(-I + UV^T)
    # x: (N, 2d, L')
    # part_Us: (N, 2d, L', threshold)
    # part_VTs: (N, threshold, 2d, L')
    if part_Us.nelement() == 0:
        return -x
    xTU = torch.einsum('bij, bijd -> bd', x, part_Us)   # (N, threshold)
    return -x + torch.einsum('bd, bdij -> bij', xTU, part_VTs)    # (N, 2d, L'), but should really be (N, 1, (2d*L'))


def matvec(part_Us, part_VTs, x):
    # Compute (-I + UV^T)x
    # x: (N, 2d, L')
    # part_Us: (N, 2d, L', threshold)
    # part_VTs: (N, threshold, 2d, L')
    if part_Us.nelement() == 0:
        return -x
    VTx = torch.einsum('bdij, bij -> bd', part_VTs, x)  # (N, threshold)
    return -x + torch.einsum('bijd, bd -> bij', part_Us, VTx)     # (N, 2d, L'), but should really be (N, (2d*L'), 1)


def broyden(f, x0, threshold, eps=1e-4, stop_mode="abs", ls=False, layer_loss=True, layer_idx=[10], name="unknown"):
    dev = x0.device
    if len(x0.shape) == 4:
        init_shape = x0.shape
        bsz, C, H, W = x0.shape
        x0 = x0.view(bsz, -1, 1)
        total_hsize = C*H*W
        seq_len = 1
        Us = torch.zeros(bsz, total_hsize, seq_len, threshold).to(dev)     # One can also use an L-BFGS scheme to further reduce memory
        VTs = torch.zeros(bsz, threshold, total_hsize, seq_len).to(dev)
    elif len(x0.shape) == 3:
        init_shape = x0.shape
        bsz, total_hsize, seq_len = x0.size()
        # For fast calculation of inv_jacobian (approximately)
        Us = torch.zeros(bsz, total_hsize, seq_len, threshold).to(dev)     # One can also use an L-BFGS scheme to further reduce memory
        VTs = torch.zeros(bsz, threshold, total_hsize, seq_len).to(dev)
    else:
        raise ValueError(f"{x0.shape} not currently supported in Broyden iterations")

    g = lambda y: f(y.view(init_shape)).view(bsz, -1, 1) - y
    alternative_mode = 'rel' if stop_mode == 'abs' else 'abs'
    
    x_est = x0           # (bsz, 2d, L')
    gx = g(x_est)        # (bsz, 2d, L')
    nstep = 0
    tnstep = 0
    

    update = -matvec(Us[:,:,:,:nstep], VTs[:,:nstep], gx)      # Formally should be -torch.matmul(inv_jacobian (-I), gx)
    prot_break = False
    
    # To be used in protective breaks
    protect_thres = (1e6 if stop_mode == "abs" else 1e3) * seq_len
    new_objective = 1e8

    trace_dict = {'abs': [],
                  'rel': []}
    lowest_dict = {'abs': 1e8,
                   'rel': 1e8}
    lowest_step_dict = {'abs': 0,
                        'rel': 0}
    nstep, lowest_xest, lowest_gx = 0, x_est, gx

    zm = []
    while nstep < threshold:
        x_est, gx, delta_x, delta_gx, ite = line_search(update, x_est, gx, g, nstep=nstep, on=ls)
        nstep += 1
        tnstep += (ite+1)
        abs_diff = torch.norm(gx).item()
        rel_diff = abs_diff / (torch.norm(gx + x_est).item() + 1e-9)
        diff_dict = {'abs': abs_diff,
                     'rel': rel_diff}
        trace_dict['abs'].append(abs_diff)
        trace_dict['rel'].append(rel_diff)
        for mode in ['rel', 'abs']:
            if diff_dict[mode] < lowest_dict[mode]:
                if mode == stop_mode: 
                    lowest_xest, lowest_gx = x_est.clone().detach(), gx.clone().detach()
                lowest_dict[mode] = diff_dict[mode]
                lowest_step_dict[mode] = nstep
        if nstep in layer_idx:
            zm.append(lowest_xest.view(init_shape))

        new_objective = diff_dict[stop_mode]
        if new_objective < eps: break
        if new_objective < 3*eps and nstep > 30 and np.max(trace_dict[stop_mode][-30:]) / np.min(trace_dict[stop_mode][-30:]) < 1.3:
            # if there's hardly been any progress in the last 30 steps
            break
        if new_objective > trace_dict[stop_mode][0] * protect_thres:
            prot_break = True
            break

        part_Us, part_VTs = Us[:,:,:,:nstep-1], VTs[:,:nstep-1]
        vT = rmatvec(part_Us, part_VTs, delta_x)
        u = (delta_x - matvec(part_Us, part_VTs, delta_gx)) / torch.einsum('bij, bij -> b', vT, delta_gx)[:,None,None]
        vT[vT != vT] = 0
        u[u != u] = 0
        VTs[:,nstep-1] = vT
        Us[:,:,:,nstep-1] = u
        update = -matvec(Us[:,:,:,:nstep], VTs[:,:nstep], gx)

    if len(layer_idx) > 0 and nstep < layer_idx[-1]:
        while len(zm) < len(layer_idx):
            zm.append(lowest_xest.view(init_shape))

    # Fill everything up to the threshold length
    for _ in range(threshold+1-len(trace_dict[stop_mode])):
        trace_dict[stop_mode].append(lowest_dict[stop_mode])
        trace_dict[alternative_mode].append(lowest_dict[alternative_mode])

    return {"result": lowest_xest.view(init_shape),
            "lowest": lowest_dict[stop_mode],
            "nstep": lowest_step_dict[stop_mode],
            "prot_break": prot_break,
            "abs_trace": trace_dict['abs'],
            "rel_trace": trace_dict['rel'],
            "eps": eps,
            "threshold": threshold,
            "interm_vals": zm}


def anderson(f, x0, m=3, lam=1e-4, threshold=50, eps=1e-3, stop_mode='rel', beta=1.0, layer_idx=[10], **kwargs):
    alternative_mode = 'rel' if stop_mode == 'abs' else 'abs'
    """ Anderson acceleration for fixed point iteration. """
    if len(x0.shape) == 4:
        bsz, C, H, W = x0.shape
        X = torch.zeros(bsz, m, C*H*W, dtype=x0.dtype, device=x0.device)
        F = torch.zeros(bsz, m, C*H*W, dtype=x0.dtype, device=x0.device)
    elif len(x0.shape) == 3:
        bsz, d, L = x0.shape
        X = torch.zeros(bsz, m, d*L, dtype=x0.dtype, device=x0.device)
        F = torch.zeros(bsz, m, d*L, dtype=x0.dtype, device=x0.device)

    lowest_xest = x0

    X[:,0], F[:,0] = x0.reshape(bsz, -1), f(x0).reshape(bsz, -1)
    X[:,1], F[:,1] = F[:,0], f(F[:,0].reshape_as(x0)).reshape(bsz, -1)
    
    H = torch.zeros(bsz, m+1, m+1, dtype=x0.dtype, device=x0.device)
    H[:,0,1:] = H[:,1:,0] = 1
    y = torch.zeros(bsz, m+1, 1, dtype=x0.dtype, device=x0.device)
    y[:,0] = 1

    trace_dict = {'abs': [],
                  'rel': []}
    lowest_dict = {'abs': 1e8,
                   'rel': 1e8}
    lowest_step_dict = {'abs': 0,
                        'rel': 0}
    
    interm_vals = []
    for k in range(2, threshold):
        n = min(k, m)
        G = F[:,:n]-X[:,:n]
        H[:,1:n+1,1:n+1] = torch.bmm(G,G.transpose(1,2)) + lam*torch.eye(n, dtype=x0.dtype,device=x0.device)[None]
        alpha = torch.solve(y[:,:n+1], H[:,:n+1,:n+1])[0][:, 1:n+1, 0]   # (bsz x n)
        
        X[:,k%m] = beta * (alpha[:,None] @ F[:,:n])[:,0] + (1-beta)*(alpha[:,None] @ X[:,:n])[:,0]
        F[:,k%m] = f(X[:,k%m].reshape_as(x0)).reshape(bsz, -1)
        gx = (F[:,k%m] - X[:,k%m]).view_as(x0)
        abs_diff = gx.norm().item()
        rel_diff = abs_diff / (1e-5 + F[:,k%m].norm().item())
        diff_dict = {'abs': abs_diff,
                     'rel': rel_diff}
        trace_dict['abs'].append(abs_diff)
        trace_dict['rel'].append(rel_diff)
        
        if k in layer_idx:
            interm_vals.append(X[:,k%m].view_as(x0).clone().detach())

        for mode in ['rel', 'abs']:
            if diff_dict[mode] < lowest_dict[mode]:
                if mode == stop_mode: 
                    lowest_xest, lowest_gx =  X[:,k%m].view_as(x0).clone().detach(), gx.clone().detach()
                lowest_dict[mode] = diff_dict[mode]
                lowest_step_dict[mode] = k

        if trace_dict[stop_mode][-1] < eps:
            for _ in range(threshold-1-k):
                trace_dict[stop_mode].append(lowest_dict[stop_mode])
                trace_dict[alternative_mode].append(lowest_dict[alternative_mode])
            break

    out = {"result": lowest_xest.view_as(x0),
           "lowest": lowest_dict[stop_mode],
           "nstep": lowest_step_dict[stop_mode],
           "prot_break": False,
           "abs_trace": trace_dict['abs'],
           "rel_trace": trace_dict['rel'],
           "eps": eps,
           "threshold": threshold,
           "interm_vals": interm_vals
            }
    X = F = None
    return out


def analyze_broyden(res_info, err=None, judge=True, name='forward', training=True, save_err=True):
    """
    For debugging use only :-)
    """
    res_est = res_info['result']
    nstep = res_info['nstep']
    diff = res_info['diff']
    diff_detail = res_info['diff_detail']
    prot_break = res_info['prot_break']
    trace = res_info['trace']
    eps = res_info['eps']
    threshold = res_info['threshold']
    if judge:
        return nstep >= threshold or (nstep == 0 and (diff != diff or diff > eps)) or prot_break or torch.isnan(res_est).any()
    
    assert (err is not None), "Must provide err information when not in judgment mode"
    prefix, color = ('', 'red') if name == 'forward' else ('back_', 'blue')
    eval_prefix = '' if training else 'eval_'
    
    # Case 1: A nan entry is produced in Broyden
    if torch.isnan(res_est).any():
        msg = colored(f"WARNING: nan found in Broyden's {name} result. Diff: {diff}", color)
        print(msg)
        if save_err: pickle.dump(err, open(f'{prefix}{eval_prefix}nan.pkl', 'wb'))
        return (1, msg, res_info)
        
    # Case 2: Unknown problem with Broyden's method (probably due to nan update(s) to the weights)
    if nstep == 0 and (diff != diff or diff > eps):
        msg = colored(f"WARNING: Bad Broyden's method {name}. Why?? Diff: {diff}. STOP.", color)
        print(msg)
        if save_err: pickle.dump(err, open(f'{prefix}{eval_prefix}badbroyden.pkl', 'wb'))
        return (2, msg, res_info)
        
    # Case 3: Protective break during Broyden (so that it does not diverge to infinity)
    if prot_break and np.random.uniform(0,1) < 0.05:
        msg = colored(f"WARNING: Hit Protective Break in {name}. Diff: {diff}. Total Iter: {len(trace)}", color)
        print(msg)
        if save_err: pickle.dump(err, open(f'{prefix}{eval_prefix}prot_break.pkl', 'wb'))
        return (3, msg, res_info)
        
    return (-1, '', res_info)
