# Supplementary material
Source: ML conference proceedings conference paper supplement (https://proceedings.neurips.cc/paper_files/paper/2022/hash/331c41353b053683e17f7c88a797701d-Abstract.html)
Supplement: Supplementary file 1 [file 331c41353b053683e17f7c88a797701d-Supplemental-Conference.zip › supp/code_release/mazes/deep-thinking-main/deepthinking/models/__init__.py]

"""Model package."""
from .dt_net_1d import dt_net_1d, dt_net_gn_1d, dt_net_recall_1d, dt_net_recall_gn_1d
from .dt_net_2d import dt_net_2d, dt_net_gn_2d, dt_net_recall_2d, dt_net_recall_gn_2d
from .feedforward_net_1d import feedforward_net_1d, feedforward_net_gn_1d, \
    feedforward_net_recall_1d, feedforward_net_recall_gn_1d
from .feedforward_net_2d import feedforward_net_2d, feedforward_net_gn_2d, \
    feedforward_net_recall_2d, feedforward_net_recall_gn_2d
    
from .deq import deq_net
from .deq_v2 import deq_net_v2
from .deq_v3 import deq_net_v3
from .deq_v4 import deq_net_v4
from .deq_layer_loss import deq_net_layer
from .deq_v3_layer_loss import deq_net_v3_layer
from .deq_1d import deq_net_1d
from .deq_v3_ablation import deq_net_v3_abl

__all__ = ["dt_net_1d", "dt_net_gn_1d", "dt_net_recall_1d", "dt_net_recall_gn_1d",
           "dt_net_2d", "dt_net_gn_2d", "dt_net_recall_2d", "dt_net_recall_gn_2d",
           "feedforward_net_1d", "feedforward_net_2d", "feedforward_net_gn_1d", "feedforward_net_gn_2d",
           "feedforward_net_recall_1d", "feedforward_net_recall_2d",
           "feedforward_net_recall_gn_1d", "feedforward_net_recall_gn_2d", 
           "deq_net", "deq_net_v2", 
           "deq_net_v3", "deq_net_v4", "deq_net_layer", "deq_net_v3_layer", "deq_net_1d",
           "deq_net_v3_abl"]
