# Supplementary material
Source: ML conference proceedings conference paper supplement (https://proceedings.neurips.cc/paper_files/paper/2022/hash/331c41353b053683e17f7c88a797701d-Abstract.html)
Supplement: Supplementary file 1 [file 331c41353b053683e17f7c88a797701d-Supplemental-Conference.zip › supp/code_release/mazes/deep-thinking-main/deepthinking/models/blocks.py]

""" blocks.py
    Neural network blocks.

    BasicBlocks borrowed from ResNet architechtures
    Deep Residual Learning for Image Recognition" <https://arxiv.org/pdf/1512.03385.pdf>

    Code borrowed from DeepThinking project
"""

from torch import nn
import torch.nn.functional as F


class BasicBlock1D(nn.Module):
    """Basic residual block class 1D"""

    expansion = 1

    def __init__(self, in_planes, planes, stride=1, group_norm=False):
        super().__init__()
        self.conv1 = nn.Conv1d(in_planes, planes, kernel_size=3,
                               stride=stride, padding=1, bias=False)
        self.gn1 = nn.GroupNorm(4, planes, affine=False) if group_norm else nn.Sequential()
        self.conv2 = nn.Conv1d(planes, planes, kernel_size=3,
                               stride=1, padding=1, bias=False)
        self.gn2 = nn.GroupNorm(4, planes, affine=False) if group_norm else nn.Sequential()

        self.shortcut = nn.Sequential()
        if stride != 1 or in_planes != self.expansion * planes:
            self.shortcut = nn.Sequential(nn.Conv1d(in_planes, self.expansion * planes,
                                                    kernel_size=1, stride=stride, bias=False))

    def forward(self, x):
        out = F.relu(self.gn1(self.conv1(x)))
        out = self.gn2(self.conv2(out))
        out += self.shortcut(x)
        out = F.relu(out)
        return out


class BasicBlock2D(nn.Module):
    """Basic residual block class 2D"""

    expansion = 1

    def __init__(self, in_planes, planes, stride=1, group_norm=False):
        super().__init__()
        self.conv1 = nn.Conv2d(in_planes, planes, kernel_size=3,
                               stride=stride, padding=1, bias=False)
        self.gn1 = nn.GroupNorm(4, planes, affine=False) if group_norm else nn.Sequential()
        self.conv2 = nn.Conv2d(planes, planes, kernel_size=3,
                               stride=1, padding=1, bias=False)
        self.gn2 = nn.GroupNorm(4, planes, affine=False) if group_norm else nn.Sequential()

        self.shortcut = nn.Sequential()
        if stride != 1 or in_planes != self.expansion * planes:
            self.shortcut = nn.Sequential(nn.Conv2d(in_planes, self.expansion * planes,
                                                    kernel_size=1, stride=stride, bias=False))
    
    def forward(self, x):
        out = F.relu(self.gn1(self.conv1(x)))
        out = self.gn2(self.conv2(out))
        out += self.shortcut(x)
        out = F.relu(out)
        return out
