# Supplementary material
Source: ML conference proceedings conference paper supplement (https://proceedings.neurips.cc/paper_files/paper/2022/hash/331c41353b053683e17f7c88a797701d-Abstract.html)
Supplement: Supplementary file 1 [file 331c41353b053683e17f7c88a797701d-Supplemental-Conference.zip › supp/code_release/mazes/deep-thinking-main/deepthinking/models/feedforward_net_1d.py]

""" feedforward_net_1d.py
    Feed-forward 1D convolutional neural network.
    Borrorwed from code for DeepThinking project
"""

import torch
from torch import nn

from .blocks import BasicBlock1D as BasicBlock

class FeedForwardNet1D(nn.Module):
    """Modified Residual Network model class"""

    def __init__(self, block, num_blocks, width, recall, max_iters=8, group_norm=False):
        super().__init__()

        self.width = int(width)
        self.recall = recall
        self.group_norm = group_norm

        proj_conv = nn.Conv1d(1, width, kernel_size=3, stride=1, padding=1, bias=False)

        if self.recall:
            self.recall_layer = nn.Conv1d(width + 1, width, kernel_size=3,
                                          stride=1, padding=1, bias=False)
        else:
            self.recall_layer = nn.Sequential()

        self.feedforward_layers = nn.ModuleList()
        for _ in range(max_iters):
            internal_block = []
            for j in range(len(num_blocks)):
                internal_block.append(self._make_layer(block, width, num_blocks[j], stride=1))
            self.feedforward_layers.append(nn.Sequential(*internal_block))

        head_conv1 = nn.Conv1d(width, width, kernel_size=3, stride=1, padding=1, bias=False)
        head_conv2 = nn.Conv1d(width, int(width/2), kernel_size=3, stride=1, padding=1, bias=False)
        head_conv3 = nn.Conv1d(int(width/2), 2, kernel_size=3, stride=1, padding=1, bias=False)

        self.iters = max_iters
        self.projection = nn.Sequential(proj_conv, nn.ReLU())
        self.head = nn.Sequential(head_conv1, nn.ReLU(), head_conv2, nn.ReLU(), head_conv3)

    def _make_layer(self, block, planes, num_blocks, stride):
        strides = [stride] + [1] * (num_blocks - 1)
        layers = []
        for strd in strides:
            layers.append(block(self.width, planes, strd, self.group_norm))
            self.width = planes * block.expansion
        return nn.Sequential(*layers)

    def forward(self, x, iters_to_do, interim_thought=None, iters_elapsed=0, return_fp=False, **kwargs):
        assert (iters_elapsed + iters_to_do) <= self.iters
        initial_thought = self.projection(x)

        if interim_thought is None:
            interim_thought = initial_thought

        all_outputs = torch.zeros((x.size(0), iters_to_do, 2, x.size(2))).to(x.device)

        for i, layer in enumerate(self.feedforward_layers[iters_elapsed:iters_elapsed+iters_to_do]):
            if self.recall:
                interim_thought = torch.cat([interim_thought, x], 1)
                interim_thought = self.recall_layer(interim_thought)
            interim_thought = layer(interim_thought)
            out = self.head(interim_thought)
            all_outputs[:, i] = out

        if self.training:
            return out, interim_thought

        if return_fp:
            return all_outputs, interim_thought

        return all_outputs


def feedforward_net_1d(width, **kwargs):
    return FeedForwardNet1D(BasicBlock, [2], width, recall=False, max_iters=kwargs["max_iters"])


def feedforward_net_recall_1d(width, **kwargs):
    return FeedForwardNet1D(BasicBlock, [2], width, recall=True, max_iters=kwargs["max_iters"])


def feedforward_net_gn_1d(width, **kwargs):
    return FeedForwardNet1D(BasicBlock, [2], width, recall=False, max_iters=kwargs["max_iters"], group_norm=True)


def feedforward_net_recall_gn_1d(width, **kwargs):
    return FeedForwardNet1D(BasicBlock, [2], width, recall=True, max_iters=kwargs["max_iters"], group_norm=True)


# Testing
if __name__ == "__main__":
    net = feedforward_net_recall_1d(width=5, max_iters=5)
    print(net)
    x_test = torch.rand(30).reshape([3, 1, 10])
    out_test, _ = net(x_test)
    print(out_test.shape)
    out_test, _ = net(x_test, n=2, k=2)
    print(out_test.shape)

    net.eval()
    outputs = net(x_test)
    print(outputs.shape)
    outputs = net(x_test, n=2, k=2)
    print(outputs.shape)
