# Supplementary material
Source: ML conference proceedings conference paper supplement (https://proceedings.neurips.cc/paper_files/paper/2022/hash/331c41353b053683e17f7c88a797701d-Abstract.html)
Supplement: Supplementary file 1 [file 331c41353b053683e17f7c88a797701d-Supplemental-Conference.zip › supp/code_release/mazes/deep-thinking-main/deepthinking/models/pixel_norm.py]

import pdb
import torch
import torch.nn as nn

class PixelNormalization(nn.Module):
    def __init__(self, eps=1e-10):
        super(PixelNormalization, self).__init__()
        self.gamma = nn.Parameter(torch.ones([1]))
        self.beta = nn.Parameter(torch.zeros([1]))
        self.eps = eps
    
    # Assumes input is (N, C, H, W)
    def forward(self, x):
        x_norm =  (x - x.mean(-3, keepdim=True))/(x.std(-3, keepdim=True, unbiased=False) + self.eps)
        return x_norm * self.gamma + self.beta 
