# Supplementary material
Source: ML conference proceedings conference paper supplement (https://proceedings.neurips.cc/paper_files/paper/2022/hash/331c41353b053683e17f7c88a797701d-Abstract.html)
Supplement: Supplementary file 1 [file 331c41353b053683e17f7c88a797701d-Supplemental-Conference.zip › supp/code_release/mazes/deep-thinking-main/deepthinking/names.py]

names = ['Michael', 'Christopher', 'Jessica', 'Matthew', 'Ashley', 'Jennifer', 'Joshua', 'Amanda', 'Daniel', 'David', 'James', 'Robert', 'John', 'Joseph', 'Andrew', 'Ryan', 'Brandon', 'Jason', 'Justin', 'Sarah', 'William', 'Jonathan', 'Stephanie', 'Brian', 'Nicole', 'Nicholas', 'Anthony', 'Heather', 'Eric', 'Elizabeth', 'Adam', 'Megan', 'Melissa', 'Kevin', 'Steven', 'Thomas', 'Timothy', 'Christina', 'Kyle', 'Rachel', 'Laura', 'Lauren', 'Amber', 'Brittany', 'Danielle', 'Richard', 'Kimberly', 'Jeffrey', 'Amy', 'Crystal', 'Michelle', 'Tiffany', 'Jeremy', 'Benjamin', 'Mark', 'Emily', 'Aaron', 'Charles', 'Rebecca', 'Jacob', 'Stephen', 'Patrick', 'Sean', 'Erin', 'Zachary', 'Jamie', 'Kelly', 'Samantha', 'Nathan', 'Sara', 'Dustin', 'Paul', 'Angela', 'Tyler', 'Scott', 'Katherine', 'Andrea', 'Gregory', 'Erica', 'Mary', 'Travis', 'Lisa', 'Kenneth', 'Bryan', 'Lindsey', 'Kristen', 'Jose', 'Alexander', 'Jesse', 'Katie', 'Lindsay', 'Shannon', 'Vanessa', 'Courtney', 'Christine', 'Alicia', 'Cody', 'Allison', 'Bradley', 'Samuel', 'Shawn', 'April', 'Derek', 'Kathryn', 'Kristin', 'Chad', 'Jenna', 'Tara', 'Maria', 'Krystal', 'Jared', 'Anna', 'Edward', 'Julie', 'Peter', 'Holly', 'Marcus', 'Kristina', 'Natalie', 'Jordan', 'Victoria', 'Jacqueline', 'Corey', 'Keith', 'Monica', 'Juan', 'Donald', 'Cassandra', 'Meghan', 'Joel', 'Shane', 'Phillip', 'Patricia', 'Brett', 'Ronald', 'Catherine', 'George', 'Antonio', 'Cynthia', 'Stacy', 'Kathleen', 'Raymond', 'Carlos', 'Brandi', 'Douglas', 'Nathaniel', 'Ian', 'Craig', 'Brandy', 'Alex', 'Valerie', 'Veronica', 'Cory', 'Whitney', 'Gary', 'Derrick', 'Philip', 'Luis', 'Diana', 'Chelsea', 'Leslie', 'Caitlin', 'Leah', 'Natasha', 'Erika', 'Casey', 'Latoya', 'Erik', 'Dana', 'Victor', 'Brent', 'Dominique', 'Frank', 'Brittney', 'Evan', 'Gabriel', 'Julia', 'Candice', 'Karen', 'Melanie', 'Adrian', 'Stacey', 'Margaret', 'Sheena', 'Wesley', 'Vincent', 'Alexandra', 'Katrina', 'Bethany', 'Nichole', 'Larry', 'Jeffery', 'Curtis', 'Carrie', 'Todd', 'Blake', 'Christian', 'Randy', 'Dennis', 'Alison', 'Trevor', 'Seth', 'Kara', 'Joanna', 'Rachael', 'Luke', 'Felicia', 'Brooke', 'Austin', 'Candace', 'Jasmine', 'Jesus', 'Alan', 'Susan', 'Sandra', 'Tracy', 'Kayla', 'Nancy', 'Tina', 'Krystle', 'Russell', 'Jeremiah', 'Carl', 'Miguel', 'Tony', 'Alexis', 'Gina', 'Jillian', 'Pamela', 'Mitchell', 'Hannah', 'Renee', 'Denise', 'Molly', 'Jerry', 'Misty', 'Mario', 'Johnathan', 'Jaclyn', 'Brenda', 'Terry', 'Lacey', 'Shaun', 'Devin', 'Heidi', 'Troy', 'Lucas', 'Desiree', 'Jorge', 'Andre', 'Morgan', 'Drew', 'Sabrina', 'Miranda', 'Alyssa', 'Alisha', 'Teresa', 'Johnny', 'Meagan', 'Allen', 'Krista', 'Marc', 'Tabitha', 'Lance', 'Ricardo', 'Martin', 'Chase', 'Theresa', 'Melinda', 'Monique', 'Tanya', 'Linda', 'Kristopher', 'Bobby', 'Caleb', 'Ashlee', 'Kelli', 'Henry', 'Garrett', 'Mallory', 'Jill', 'Jonathon', 'Kristy', 'Anne', 'Francisco', 'Danny', 'Robin', 'Lee', 'Tamara', 'Manuel', 'Meredith', 'Colleen', 'Lawrence', 'Christy', 'Ricky', 'Randall', 'Marissa', 'Ross', 'Mathew', 'Jimmy', 'Abigail', 'Kendra', 'Carolyn', 'Billy', 'Deanna', 'Jenny', 'Jon', 'Albert', 'Taylor', 'Lori', 'Rebekah', 'Cameron', 'Ebony', 'Wendy', 'Angel', 'Micheal', 'Kristi', 'Caroline', 'Colin', 'Dawn', 'Kari', 'Clayton', 'Arthur', 'Roger', 'Roberto', 'Priscilla', 'Darren', 'Kelsey', 'Clinton', 'Walter', 'Louis', 'Barbara', 'Isaac', 'Cassie', 'Grant', 'Cristina', 'Tonya', 'Rodney', 'Bridget', 'Joe', 'Cindy', 'Oscar', 'Willie', 'Maurice', 'Jaime', 'Angelica', 'Sharon', 'Julian', 'Jack', 'Jay', 'Calvin', 'Marie', 'Hector', 'Kate', 'Adrienne', 'Tasha', 'Michele', 'Ana', 'Stefanie', 'Cara', 'Alejandro', 'Ruben', 'Gerald', 'Audrey', 'Kristine', 'Ann', 'Shana', 'Javier', 'Katelyn', 'Brianna', 'Bruce', 'Deborah', 'Claudia', 'Carla', 'Wayne', 'Roy', 'Virginia', 'Haley', 'Brendan', 'Janelle', 'Jacquelyn', 'Beth', 'Edwin', 'Dylan', 'Dominic', 'Latasha', 'Darrell', 'Geoffrey', 'Savannah', 'Reginald', 'Carly', 'Fernando', 'Ashleigh', 'Aimee', 'Regina', 'Mandy', 'Sergio', 'Rafael', 'Pedro', 'Janet', 'Kaitlin', 'Frederick', 'Cheryl', 'Autumn', 'Tyrone', 'Martha', 'Omar', 'Lydia', 'Jerome', 'Theodore', 'Abby', 'Neil', 'Shawna', 'Sierra', 'Nina', 'Tammy', 'Nikki', 'Terrance', 'Donna', 'Claire', 'Cole', 'Trisha', 'Bonnie', 'Diane', 'Summer', 'Carmen', 'Mayra', 'Jermaine', 'Eddie', 'Micah', 'Marvin', 'Levi', 'Emmanuel', 'Brad', 'Taryn', 'Toni', 'Jessie', 'Evelyn', 'Darryl', 'Ronnie', 'Joy', 'Adriana', 'Ruth', 'Mindy', 'Spencer', 'Noah', 'Raul', 'Suzanne', 'Sophia', 'Dale', 'Jodi', 'Christie', 'Raquel', 'Naomi', 'Kellie', 'Ernest', 'Jake', 'Grace', 'Tristan', 'Shanna', 'Hilary', 'Eduardo', 'Ivan', 'Hillary', 'Yolanda', 'Alberto', 'Andres', 'Olivia', 'Armando', 'Paula', 'Amelia', 'Sheila', 'Rosa', 'Robyn', 'Kurt', 'Dane', 'Glenn', 'Nicolas', 'Gloria', 'Eugene', 'Logan', 'Steve', 'Ramon', 'Bryce', 'Tommy', 'Preston', 'Keri', 'Devon', 'Alana', 'Marisa', 'Melody', 'Rose', 'Barry', 'Marco', 'Karl', 'Daisy', 'Leonard', 'Randi', 'Maggie', 'Charlotte', 'Emma', 'Terrence', 'Justine', 'Britney', 'Lacy', 'Jeanette', 'Francis', 'Tyson', 'Elise', 'Sylvia', 'Rachelle', 'Stanley', 'Debra', 'Brady', 'Charity', 'Hope', 'Melvin', 'Johanna', 'Karla', 'Jarrod', 'Charlene', 'Gabrielle', 'Cesar', 'Clifford', 'Byron', 'Terrell', 'Sonia', 'Julio', 'Stacie', 'Shelby', 'Shelly', 'Edgar', 'Roxanne', 'Dwayne', 'Kaitlyn', 'Kasey', 'Jocelyn', 'Alexandria', 'Harold', 'Esther', 'Kerri', 'Ellen', 'Abraham', 'Cedric', 'Carol', 'Katharine', 'Shauna', 'Frances', 'Antoine', 'Tabatha', 'Annie', 'Erick', 'Alissa', 'Sherry', 'Chelsey', 'Franklin', 'Branden', 'Helen', 'Traci', 'Lorenzo', 'Dean', 'Sonya', 'Briana', 'Angelina', 'Trista', 'Bianca', 'Leticia', 'Tia', 'Kristie', 'Stuart', 'Laurie', 'Harry', 'Leigh', 'Elisabeth', 'Alfredo', 'Aubrey', 'Ray', 'Arturo', 'Joey', 'Kelley', 'Max', 'Andy', 'Latisha', 'Johnathon', 'India', 'Eva', 'Ralph', 'Yvonne', 'Warren', 'Kirsten', 'Miriam', 'Kelvin', 'Lorena', 'Staci', 'Anita', 'Rene', 'Cortney', 'Orlando', 'Carissa', 'Jade', 'Camille', 'Leon', 'Paige', 'Marcos', 'Elena', 'Brianne', 'Dorothy', 'Marshall', 'Daryl', 'Colby', 'Terri', 'Gabriela', 'Brock', 'Gerardo', 'Jane', 'Nelson', 'Tamika', 'Alvin', 'Chasity', 'Trent', 'Jana', 'Enrique', 'Tracey', 'Antoinette', 'Jami', 'Earl', 'Gilbert', 'Damien', 'Janice', 'Christa', 'Tessa', 'Kirk', 'Yvette', 'Elijah', 'Howard', 'Elisa', 'Desmond', 'Clarence', 'Alfred', 'Darnell', 'Breanna', 'Kerry', 'Nickolas', 'Maureen', 'Karina', 'Roderick', 'Rochelle', 'Rhonda', 'Keisha', 'Irene', 'Ethan', 'Alice', 'Allyson', 'Hayley', 'Trenton', 'Beau', 'Elaine', 'Demetrius', 'Cecilia', 'Annette', 'Brandie', 'Katy', 'Tricia', 'Bernard', 'Wade', 'Chance', 'Bryant', 'Zachery', 'Clifton', 'Julianne', 'Angelo', 'Elyse', 'Lyndsey', 'Clarissa', 'Meaghan', 'Tanisha', 'Ernesto', 'Isaiah', 'Xavier', 'Clint', 'Jamal', 'Kathy', 'Salvador', 'Jena', 'Marisol', 'Darius', 'Guadalupe', 'Chris', 'Patrice', 'Jenifer', 'Lynn', 'Landon', 'Brenton', 'Sandy', 'Jasmin', 'Ariel', 'Sasha', 'Juanita', 'Israel', 'Ericka', 'Quentin', 'Jayme', 'Damon', 'Heath', 'Kira', 'Ruby', 'Rita', 'Tiara', 'Jackie', 'Jennie', 'Collin', 'Lakeisha', 'Kenny', 'Norman', 'Leanne', 'Hollie', 'Destiny', 'Shelley', 'Amie', 'Callie', 'Hunter', 'Duane', 'Sally', 'Serena', 'Lesley', 'Connie', 'Dallas', 'Simon', 'Neal', 'Laurel', 'Eileen', 'Lewis', 'Bobbie', 'Faith', 'Brittani', 'Shayla', 'Eli', 'Judith', 'Terence', 'Ciara', 'Charlie', 'Alyson', 'Vernon', 'Alma', 'Quinton', 'Nora', 'Lillian', 'Leroy', 'Joyce', 'Chrystal', 'Marquita', 'Lamar', 'Ashlie', 'Kent', 'Emanuel', 'Joanne', 'Gavin', 'Yesenia', 'Perry', 'Marilyn', 'Graham', 'Constance', 'Lena', 'Allan', 'Juliana', 'Jayson', 'Shari', 'Nadia', 'Tanner', 'Isabel', 'Becky', 'Rudy', 'Blair', 'Christen', 'Rosemary', 'Marlon', 'Glen', 'Genevieve', 'Damian', 'Michaela', 'Shayna', 'Marquis', 'Fredrick', 'Celeste', 'Bret', 'Betty', 'Kurtis', 'Rickey', 'Dwight', 'Rory', 'Mia', 'Josiah', 'Norma', 'Bridgette', 'Shirley', 'Sherri', 'Noelle', 'Chantel', 'Alisa', 'Zachariah', 'Jody', 'Christin', 'Julius', 'Gordon', 'Latonya', 'Lara', 'Lucy', 'Jarrett', 'Elisha', 'Deandre', 'Audra', 'Beverly', 'Felix', 'Alejandra', 'Nolan', 'Tiffani', 'Lonnie', 'Don', 'Darlene', 'Rodolfo', 'Terra', 'Sheri', 'Iris', 'Maxwell', 'Kendall', 'Ashly', 'Kendrick', 'Jean', 'Jarvis', 'Fred', 'Tierra', 'Abel', 'Pablo', 'Maribel', 'Donovan', 'Stephan', 'Judy', 'Elliott', 'Tyrell', 'Chanel', 'Miles', 'Fabian', 'Alfonso', 'Cierra', 'Mason', 'Larissa', 'Elliot', 'Brenna', 'Bradford', 'Kristal', 'Gustavo', 'Gretchen', 'Derick', 'Jarred', 'Pierre', 'Lloyd', 'Jolene', 'Marlene', 'Leo', 'Jamar', 'Dianna', 'Noel', 'Angie', 'Tatiana', 'Rick', 'Leann', 'Corinne', 'Sydney', 'Belinda', 'Lora', 'Mackenzie', 'Herbert', 'Guillermo', 'Tameka', 'Elias', 'Janine', 'Ben', 'Stefan', 'Josephine', 'Dominick', 'Jameson', 'Bobbi', 'Blanca', 'Josue', 'Esmeralda', 'Darin', 'Ashely', 'Clay', 'Cassidy', 'Roland', 'Ismael', 'Harrison', 'Lorraine', 'Owen', 'Daniela', 'Rocky', 'Marisela', 'Saul', 'Kory', 'Dexter', 'Chandra', 'Gwendolyn', 'Francesca', 'Alaina', 'Mandi', 'Fallon', 'Celia', 'Vivian', 'Rolando', 'Raven', 'Lionel', 'Carolina', 'Tania', 'Joann', 'Casandra', 'Betsy', 'Tracie', 'Dante', 'Trey', 'Margarita', 'Skyler', 'Sade', 'Lyndsay', 'Jacklyn', 'Marina', 'Rogelio', 'Racheal', 'Mollie', 'Liliana', 'Maegan', 'Felipe', 'Malcolm', 'Santana', 'Anastasia', 'Madeline', 'Breanne', 'Tiffanie', 'Dillon', 'Melisa', 'Darrin', 'Carlton', 'Cornelius', 'Precious', 'Ivy', 'Lea', 'Susana', 'Loren', 'Jeff', 'Chiquita', 'Teri', 'Tera', 'Caitlyn', 'Hailey', 'Donte', 'Oliver', 'Natalia', 'Cherie', 'Lakisha', 'Karissa', 'Jeannette', 'Ariana', 'Lucia', 'Jerrod', 'Kassandra', 'Guy', 'Milton', 'Micaela', 'Krystina', 'Esteban', 'Gilberto', 'Chelsie', 'Antwan', 'Cathy', 'Ty', 'Shante', 'Roman', 'Kylie', 'Mercedes', 'Dena', 'Christi', 'Latrice', 'Kellen', 'Freddie', 'Clara', 'Rosanna', 'Demarcus', 'Domonique', 'Alvaro', 'Shaina', 'Nathanael', 'Kacie', 'Jodie', 'Dusty', 'Sidney', 'Adrianne', 'Mike', 'Chloe', 'Alecia', 'Sam', 'Rocio', 'Kim', 'Arlene', 'Antonia', 'Jamaal', 'Shantel', 'Deidre', 'Salvatore', 'Kimberley', 'Gerard', 'Gene', 'Weston', 'Diego', 'Tasia', 'Mariah', 'Jimmie', 'Zackary', 'Hugo', 'Leanna', 'Lacie', 'Donnie', 'Aisha', 'Marianne', 'Lana', 'Kyla', 'Ginger', 'Tiana', 'Lashonda', 'Dayna', 'Marcia', 'Luz', 'Janna', 'Riley', 'Desirae', 'Billie', 'Zane', 'Johnnie', 'Greg', 'Angelique', 'Kali', 'Silvia', 'Asia', 'Quincy', 'Catrina', 'Rusty', 'Frankie', 'Athena', 'Randolph', 'Sheldon', 'Maricela', 'Tomas', 'Toby', 'Nadine', 'Keshia', 'Tosha', 'Maranda', 'Lester', 'Brendon', 'Korey', 'Lynette', 'Joan', 'Justina', 'Moses', 'Dominque', 'Abbey', 'Kristyn', 'Dewayne', 'Alonzo', 'Laci', 'Cori', 'Debbie', 'Zackery', 'Parker', 'Forrest', 'Blaine', 'Trina', 'Herman', 'Selena', 'Myra', 'Joni', 'Bailey', 'Julianna', 'Edith', 'Octavia', 'Bryon', 'Arielle', 'Giovanni', 'Jarod', 'Floyd', 'Sonja', 'Kody', 'Jamel', 'Jeannie', 'Elissa', 'Leonardo', 'Sadie', 'Madison', 'Kandice', 'Janie', 'Reid', 'Alanna', 'Linsey', 'Moises', 'Darcy', 'Britni', 'Beatrice', 'Everett', 'Corina', 'Brooks', 'Tori', 'Ramiro', 'Lamont', 'Kenya', 'Cheri', 'Alec', 'Roberta', 'Jeanne', 'Jackson', 'Maritza', 'Loretta', 'Shameka', 'Sebastian', 'Ryne', 'Scotty', 'Emilie', 'Ladonna', 'Stewart', 'Dina', 'Clark', 'Chadwick', 'Araceli', 'Ali', 'Kareem', 'Janette', 'Savanna', 'Reuben', 'Nakia', 'Martina', 'Wilson', 'Kristian', 'Daphne', 'Clyde', 'Braden', 'Sterling', 'Cari', 'Marsha', 'Deidra', 'Bridgett', 'Rhiannon', 'Kristofer', 'Keenan', 'Joelle', 'Colt', 'Celina', 'Deana', 'Penny', 'Georgia', 'Eleanor', 'Shanika', 'Daniella', 'Bernadette', 'Valarie', 'Tarah', 'Princess', 'Noemi', 'Maura', 'Maryann', 'Jonah', 'Santiago', 'Jamison', 'Cecil', 'Ted', 'Selina', 'Dan', 'Reynaldo', 'Myron', 'Sofia', 'Doris', 'Deangelo', 'Ashli', 'Randal', 'Noe', 'Jess', 'Holli', 'Chester', 'Rex', 'Meghann', 'Janell', 'Garret', 'Marjorie', 'Avery', 'Jazmin', 'Christal', 'Freddy', 'Carson', 'Raphael', 'Quintin', 'Lakesha', 'Gladys', 'Lizette', 'Latosha', 'Carina', 'Nick', 'Joaquin', 'Garry', 'Erich', 'Brennan', 'Valencia', 'Dion', 'Peggy', 'Nicolette', 'Leeann', 'Maya', 'Lakeshia', 'Deon', 'Ciera', 'Tami', 'Olga', 'Josh', 'Cristal', 'Brice', 'Beatriz', 'Wendell', 'Jenelle', 'Efrain', 'Lyle', 'Krysta', 'Solomon', 'Jordon', 'Colette', 'Alesha', 'Sammy', 'Rigoberto', 'Liza', 'Kristan', 'Eliza', 'Lily', 'Hanna', 'Candy', 'Adan', 'Renae', 'Marcella', 'Lynsey', 'Chastity', 'Pauline', 'Shamika', 'Humberto', 'Eboni', 'Aron', 'Adrianna', 'Sheree', 'Shanta', 'Marla', 'Delilah', 'Susanna', 'Kaylee', 'Kassie', 'Felisha', 'Aileen', 'Geneva', 'Wanda', 'Siobhan', 'Shea', 'Kimberlee', 'Gillian', 'Roxana', 'Gabriella', 'Chantelle', 'Candis', 'Abbie', 'Jeanine', 'Harvey', 'Dora', 'Barrett', 'Amos', 'Marlena', 'Marcie', 'Lucinda', 'Reed', 'Giselle', 'Griselda', 'Ashton', 'Alycia', 'Talia', 'Magen', 'Anton', 'Vicente', 'Hugh', 'Harley', 'Cristy', 'Valeria', 'Thaddeus', 'Simone', 'Kylee', 'Kirby', 'Dorian', 'Andria', 'Marques', 'Kala', 'Kacey', 'Fatima', 'Conrad', 'Dara', 'Winston', 'Robbie', 'Kiel', 'Emilio', 'Cora', 'Sharonda', 'Josie', 'Marci', 'Laquita', 'Kia', 'Danelle', 'Leila', 'Chantal', 'Tess', 'Tamra', 'Nathanial', 'Francine', 'Mauricio', 'Janae', 'Donnell', 'Arron', 'Stevie', 'Ramona', 'Royce', 'Kourtney', 'Kathrine', 'Shanda', 'Myles', 'Kaci', 'Jerod', 'Ingrid', 'Bradly', 'Benny', 'Malinda', 'Kati', 'Irma', 'Glenda', 'Brittni', 'Mariana', 'Kayleigh', 'Jairo', 'Wyatt', 'Rikki', 'Britany', 'Viviana', 'Jim', 'Durell', 'Clare', 'Bryson', 'Aurora', 'Vicki', 'Venessa', 'Alton', 'Jerrell', 'Casie', 'Kori', 'Keegan', 'Sophie', 'Perla', 'Paris', 'Misti', 'Chaz', 'Otis', 'Morris', 'Mara', 'Jeri', 'Jeanna', 'Deshawn', 'Will', 'Tanesha', 'Sherrie', 'Marcel', 'Demario', 'Sonny', 'Lynda', 'Joesph', 'Elvis', 'Yadira', 'Marian', 'Jovan', 'Edna', 'Dolores', 'Conor', 'Alexa', 'Sheryl', 'Lissette', 'Kaleb', 'Ignacio', 'Emilee', 'Annmarie', 'Vicky', 'Tyree', 'Cary', 'Tyra', 'Sherman', 'Nathalie', 'Lukas', 'Karin', 'Jaimie', 'Corrie', 'Reyna', 'Prince', 'Nigel', 'Lourdes', 'Louise', 'Jonas', 'Hallie', 'Alyse', 'Wilfredo', 'Sylvester', 'Marcy', 'Jesica', 'Gail', 'Zoe', 'Tabetha', 'Rena', 'Arnold', 'Elsa', 'Cherish', 'Brody', 'Markus', 'Elaina', 'Deirdre', 'Cortez', 'Stacia', 'Rosalinda', 'Deandra', 'Roxanna', 'Kami', 'Davon', 'Cathleen', 'Claude', 'Ahmad', 'Tonia', 'Richelle', 'Kandace', 'Danyelle', 'Willis', 'Jerad', 'Helena', 'Danica', 'Cale', 'Rosemarie', 'Meggan', 'Janel', 'Chana', 'Brittny', 'Ashlea', 'Antwon', 'Yasmin', 'Nikolas', 'Mellissa', 'Charmaine', 'Alina', 'Rodrigo', 'Nikole', 'Mckenzie', 'Leonel', 'Kaley', 'Jessi', 'Delia', 'Melina', 'Hilda', 'Alysha', 'Pete', 'Niki', 'Davis', 'Cristian', 'Waylon', 'Wallace', 'Keely', 'Graciela', 'Demetria', 'Cecelia', 'Issac', 'Felecia', 'Ami', 'Tom', 'Shavon', 'Paola', 'Lane', 'June', 'Hans', 'Earnest', 'Cheyenne', 'Sondra', 'Sherita', 'Jasper', 'Coty', 'Candi', 'Santos', 'Ron', 'Jace', 'Darla', 'Dannielle', 'Carley', 'Brandan', 'Bill', 'Tory', 'Skylar', 'Marta', 'Cristin', 'Connor', 'Carter', 'Carey', 'Wendi', 'Shasta', 'Shaquita', 'Maira', 'Jazmine', 'Edmund', 'Adriane', 'Tana', 'Latoria', 'Kyra', 'Krysten', 'Jada', 'Derik', 'Darrel', 'Amir', 'Shanita', 'Rebeca', 'Monika', 'Mai', 'Luther', 'Jo', 'Georgina', 'Gena', 'Ezra', 'Quinn', 'Portia', 'Mickey', 'Magan', 'Lisette', 'Josef', 'Colton', 'Brittanie', 'Malissa', 'Krystin', 'Jefferson', 'Rashad', 'Kiley', 'Kerrie', 'Stephany', 'Lia', 'Katheryn', 'Juliet', 'Gregg', 'Brynn', 'Rosalyn', 'Marion', 'Katelin', 'Jeana', 'Cassondra', 'Agustin', 'Tyesha', 'Leland', 'Damion', 'Sharita', 'Pearl', 'Shara', 'Matt', 'Duncan', 'Mari', 'Latanya', 'Karly', 'Cathryn', 'Alena', 'Ada', 'Vance', 'Susie', 'Sunny', 'Nikita', 'Corrine', 'Brook', 'Bertha', 'Mitchel', 'Ira', 'Carlie', 'Brant', 'Bennett', 'Violeta', 'Tyrel', 'Rosalie', 'Markita', 'Akeem', 'Aja', 'Stefani', 'Jenni', 'Galen', 'Deena', 'Shavonne', 'Robby', 'Kirstin', 'Kasie', 'Eunice', 'Brigitte', 'Tisha', 'Shena', 'Shayne', 'Rudolph', 'Roosevelt', 'Mikel', 'Kacy', 'Breann', 'Salina', 'Rodrick', 'Mariel', 'Kelsie', 'Karrie', 'Jessika', 'Jarrell', 'Curt', 'Stella', 'Shira', 'Rhett', 'Marty', 'Iesha', 'Devan', 'Brain', 'Tammie', 'Shantell', 'Mohammad', 'Kiana', 'Jaqueline', 'Caryn', 'Samatha', 'Nia', 'Mona', 'Leilani', 'Lashanda', 'Javon', 'Ida', 'Francisca', 'Carlo', 'Amberly', 'Alexia', 'Nichelle', 'Janessa', 'Charissa', 'Bo', 'Annemarie', 'Therese', 'Porsha', 'Karyn', 'Julissa', 'Dejuan', 'Brandee', 'Abram', 'Tobias', 'Suzanna', 'Stephaine', 'Heriberto', 'Antionette', 'Tenisha', 'Teddy', 'Mellisa', 'Johnna', 'Eve', 'Elvia', 'Elana', 'Durrell', 'Lindy', 'Joana', 'Griffin', 'Ellis', 'Damaris', 'Alia', 'Tommie', 'Shalonda', 'Margo', 'Jered', 'Dave', 'Cherise', 'Brenden', 'Virgil', 'Teena', 'Sarina', 'Rico', 'Madonna', 'Liam', 'Halley', 'Alysia', 'Timmy', 'Teela', 'Sommer', 'Natashia', 'Liana', 'Jerald', 'Ella', 'Bernice', 'Taurean', 'Tanika', 'Nicolle', 'Jed', 'Jacques', 'Van', 'Stephenie', 'Jeremie', 'Jamil', 'Jamila', 'Bennie', 'Alphonso', 'Violet', 'Tashina', 'Shenna', 'Shanelle', 'Dereck', 'Angelia', 'Adolfo', 'Tawny', 'Marcela', 'Magdalena', 'Katlyn', 'Darci', 'Benito', 'Asa', 'Tucker', 'Sue', 'Latesha', 'Katina', 'Jayne', 'Coleman', 'Antione', 'Renita', 'Nestor', 'Natosha', 'Kay', 'Jeramy', 'Jaron', 'Elmer', 'Dianne', 'Tamera', 'Stephani', 'Osvaldo', 'Laurence', 'Diamond', 'Juana', 'Anais', 'Shanell', 'Shanae', 'Mohammed', 'Afton', 'Vickie', 'Sharee', 'Leona', 'Kesha', 'Kenton', 'Cornell', 'Ashlyn', 'Titus', 'Tianna', 'Sarai', 'May', 'Kasandra', 'Ivory', 'Grayson', 'Darrick', 'Cristopher', 'Aubree', 'Archie', 'Angeline', 'Shakira', 'Scottie', 'Rocco', 'Mikaela', 'Maxine', 'Kiera', 'Karli', 'Grady', 'Ervin', 'Cyrus', 'Ava', 'Aric', 'Allie', 'Raymundo', 'Lila', 'Jammie', 'Fawn', 'Annamarie', 'Yajaira', 'Ursula', 'Shannan', 'Shaniqua', 'Latia', 'Eugenia', 'Dulce', 'Crystle', 'Brittaney', 'Arianna', 'Vaughn', 'Reggie', 'Malia', 'Lashawn', 'Kandi', 'Isiah', 'Elsie', 'Domingo', 'Denisha', 'Deanne', 'Daren', 'Corinna', 'Chaya', 'Chanelle', 'Tegan', 'Shardae', 'Rhea', 'Phyllis', 'Nicki', 'Kortney', 'Kisha', 'Jeromy', 'Dalton', 'Cedrick', 'Vera', 'Tad', 'Shonda', 'Shequita', 'Malorie', 'Lois', 'Keon', 'Jeffry', 'Jan', 'Darron', 'Christiana', 'Carli', 'Cali', 'Stormy', 'Starla', 'Jedidiah', 'Jeannine', 'Gonzalo', 'Dionne', 'Shellie', 'Florence', 'Fidel', 'Estevan', 'Crista', 'Chantell', 'Chante', 'Shaneka', 'Rufus', 'Roxann', 'Lynnette', 'Latricia', 'Kaila', 'Geraldine', 'Dontae', 'Chauncey', 'Ari', 'Ulysses', 'Stephon', 'Shelia', 'Sharde', 'Shanon', 'Nataly', 'Luisa', 'Leandra', 'Danae', 'Channing', 'Tamar', 'Suzette', 'Lina', 'Kenisha', 'Farrah', 'Fabiola', 'Bronson', 'Adria', 'Racquel', 'Phylicia', 'Lidia', 'Lazaro', 'Lawanda', 'Kera', 'Josefina', 'Harmony', 'Elicia', 'Davin', 'Codi', 'Bree', 'Nichol', 'Marybeth', 'Elvin', 'Broderick', 'Bart', 'Ayesha', 'Ahmed', 'Vanesa', 'Tyron', 'Susannah', 'Shera', 'Rickie', 'Octavio', 'Nikia', 'Malik', 'Jamey', 'Cruz', 'Chandler', 'Cassi', 'Aracely', 'Tiesha', 'Rosie', 'Louie', 'Kristoffer', 'Kiersten', 'Keli', 'Ivette', 'Hazel', 'Hassan', 'German', 'Ebonie', 'Camilla', 'Ariane', 'Alishia', 'Tiera', 'Sherika', 'Ronda', 'Lynne', 'Lindsy', 'Juliann', 'Shelton', 'Randell', 'Phoebe', 'Moshe', 'Martell', 'Kenyatta', 'Isidro', 'Ezekiel', 'Diandra', 'Denny', 'Danial', 'Dalia', 'Christoper', 'Britton', 'August', 'Silas', 'Reina', 'Mallorie', 'Loni', 'Lincoln', 'Judson', 'Edmond', 'Buddy', 'Starr', 'Reva', 'Mohamed', 'Kandis', 'Echo', 'Wilbert', 'Rosanne', 'Rashawn', 'Quiana', 'Lakia', 'Juliette', 'Jeanie', 'Donny', 'Delbert', 'Coy', 'Cami', 'Anabel', 'Taisha', 'Marguerite', 'Justen', 'Jonelle', 'Jaymes', 'Gregorio', 'Gino', 'Amit', 'Monte', 'Mariam', 'Mack', 'Kelsi', 'Kady', 'Federico', 'Elvira', 'Dirk', 'Alexandrea', 'Tashia', 'Sharina', 'Sandi', 'Rosario', 'Margot', 'Lorna', 'Ken', 'Junior', 'Jaimee', 'Emilia', 'Ashlei', 'Taneisha', 'Savanah', 'Paulette', 'Leif', 'Jeremey', 'Hubert', 'Greta', 'Garrick', 'Garett', 'Esperanza', 'Errol', 'Daron', 'Darcie', 'Chelsi', 'Amalia', 'Alessandra', 'Aida', 'Ahsley', 'Adina', 'Susanne', 'Samson', 'Roseann', 'Moriah', 'Laron', 'Laken', 'Keaton', 'Jewel', 'Faye', 'Dakota', 'Corie', 'Chaim', 'Bernardo', 'Ulises', 'Shawanda', 'Schuyler', 'Scarlett', 'Reanna', 'Raina', 'Rae', 'Marquise', 'Jessenia', 'Cooper', 'Cliff', 'Catalina', 'Rayna', 'Pierce', 'Letitia', 'Johathan', 'Jerri', 'Francesco', 'Derrell', 'Charisse', 'Alona', 'Shanice', 'Nellie', 'Mildred', 'Lorie', 'Katelynn', 'Darwin', 'Coral', 'Carlee', 'Brandyn', 'Willard', 'Tylor', 'Trinity', 'Tiffiny', 'Shantelle', 'Shandi', 'Marlin', 'Kraig', 'Keena', 'Genna', 'Eden', 'Cristen', 'Consuelo', 'Anika', 'Shani', 'Serina', 'Renata', 'Regan', 'Jacquelynn', 'Holley', 'Delores', 'Breana', 'Brannon', 'Vanity', 'Tawanna', 'Tammi', 'Shaunna', 'Sharlene', 'Ryann', 'Niesha', 'Michel', 'Laquisha', 'Jerrad', 'Jermey', 'Gwen', 'Ginny', 'Eryn', 'Drake', 'Donta', 'Dixie', 'Danna', 'Dani', 'Cade', 'Shaquana', 'Scot', 'Nicholaus', 'Lowell', 'Kindra', 'Jenniffer', 'Efren', 'Daniele', 'Candyce', 'Angelita', 'Aleshia', 'Thelma', 'Shaunte', 'Ronny', 'Margie', 'Greggory', 'Tim', 'Sharday', 'Samara', 'Louisa', 'Leighann', 'Joi', 'Hana', 'Davina', 'Cullen', 'Cinthia', 'Brigid', 'Braxton', 'Baby', 'Antony', 'Valentina', 'Skye', 'Shenika', 'Myesha', 'Kaycee', 'Kai', 'Jenae', 'Horace', 'Falon', 'Deonte', 'Darrius', 'Alesia', 'Xiomara', 'Tremaine', 'Tawana', 'Samir', 'Rachell', 'Rachele', 'Muhammad', 'Maren', 'Lilia', 'Kiara', 'Donavan', 'Denis', 'Danyell', 'Brandin', 'Asha', 'Shakia', 'Rosalind', 'Rodger', 'Latoyia', 'Kristle', 'Kris', 'Kenna', 'Kellyn', 'Karri', 'Kalyn', 'Ilana', 'Elton', 'Edwardo', 'Daniell', 'Blaire', 'Anderson', 'Vince', 'Ramsey', 'Percy', 'Melodie', 'Lashawnda', 'Keven', 'Kallie', 'Jedediah', 'Gayle', 'Ernie', 'Charla', 'Aldo', 'Uriel', 'Talisha', 'Mindi', 'Mariela', 'Madeleine', 'Jonna', 'Isaias', 'Giovanna', 'Erwin', 'Elysia', 'Deron', 'Westley', 'Theron', 'Terell', 'Pricilla', 'Michell', 'Mattie', 'Lucille', 'Lela', 'Houston', 'Gracie', 'Eliot', 'Carole', 'Carmela', 'Asher', 'Yuliana', 'Shoshana', 'Shawnta', 'Lizbeth', 'Kenyetta', 'Kendal', 'Karie', 'Jenilee', 'Iliana', 'Dario', 'Chassidy', 'Chadd', 'Brandt', 'Bettina', 'Benita', 'Andreas', 'Tiffaney', 'Shay', 'Roseanna', 'Meagen', 'Libby', 'Kasi', 'Kale', 'Irvin', 'Eliseo', 'Dionna', 'Denver', 'Cleveland', 'Vito', 'Trace', 'Tawnya', 'Tamesha', 'Marianna', 'Kaylin', 'Jeramie', 'Fletcher', 'Eloy', 'Dandre', 'Brigette', 'Anya', 'Al', 'Aleisha', 'Taren', 'Kolby', 'Keosha', 'Kennith', 'Jamee', 'Desire', 'Coby', 'Brittnie', 'Sharla', 'Romeo', 'Raheem', 'Petra', 'Nisha', 'Michal', 'Kierra', 'Kellee', 'Keira', 'Juston', 'Jaymie', 'Gianna', 'Flor', 'Fiona', 'Edgardo', 'Reese', 'Nickie', 'Melonie', 'Lillie', 'Joshuah', 'Jessy', 'Deven', 'Demarco', 'Darell', 'Cyndi', 'Cayla', 'Aubrie', 'Alayna', 'Walker', 'Trever', 'Rayshawn', 'Nicola', 'Natali', 'Martez', 'Kristel', 'Jory', 'Jesenia', 'Jeniffer', 'Jarret', 'Hank', 'Emerson', 'Emerald', 'Valentin', 'Steffanie', 'Marley', 'Linnea', 'Lenora', 'Leia', 'Lauryn', 'Joslyn', 'Joleen', 'Janeen', 'Deann', 'Dangelo', 'Cherelle', 'Armand', 'Alden', 'Yessenia', 'Takia', 'Sunshine', 'Shemeka', 'Makeda', 'Lashunda', 'Kiesha', 'Katey', 'Jereme', 'Jacquline', 'Jacquelin', 'Eddy', 'Derrek', 'Bryanna', 'Aundrea', 'Arnulfo', 'Arianne', 'Whittney', 'Travon', 'Tangela', 'Shandra', 'Randa', 'Marlana', 'Maia', 'Krystel', 'Emmett', 'Deric', 'Darby', 'Danika', 'Blythe', 'Bessie', 'Ayanna', 'Toya', 'Terrie', 'Tahnee', 'Rasheed', 'Nelly', 'Leigha', 'Kalen', 'Kaleigh', 'Jordy', 'Johnson', 'Johnpaul', 'Jakob', 'Jabari', 'Deshaun', 'Chanda', 'Porsche', 'Minerva', 'Lyndon', 'Kaleena', 'Kalee', 'Kailey', 'Jacinda', 'Flora', 'Donielle', 'Danyel', 'Cristobal', 'Cristine', 'Brittnee', 'Antwain', 'Alain', 'Tomeka', 'Thea', 'Shelli', 'Shantae', 'Saundra', 'Priya', 'Nathen', 'Mitch', 'Maximilian', 'Layla', 'Kymberly', 'Kaylan', 'Kassi', 'Jerimiah', 'Jennafer', 'Jeni', 'Inez', 'Erinn', 'Eleni', 'Elbert', 'Donell', 'Demond', 'Darian', 'Bethanie', 'Belen', 'Annika', 'Adrain', 'Wilbur', 'Tuan', 'Torrey', 'Shala', 'Salena', 'Patsy', 'Latrisha', 'Kip', 'Kalie', 'Jasen', 'Jarell', 'Jarad', 'Janis', 'Jacoby', 'Collette', 'Claudio', 'Chrissy', 'Chassity', 'Austen', 'Arica', 'Alondra', 'Alexandro', 'Tye', 'Tonisha', 'Tarra', 'Rashida', 'Natisha', 'Nakita', 'Monty', 'Marcelino', 'Lani', 'Kimber', 'Khalil', 'Kameron', 'Jonmichael', 'Johana', 'Jaclynn', 'Homer', 'Hayden', 'Emil', 'Elyssa', 'Davida', 'Boyd', 'Augustine', 'Yosef', 'Wilfred', 'Venus', 'Tequila', 'Shaunta', 'Roseanne', 'Ravi', 'Raechel', 'Mychal', 'Maryanne', 'Kaylie', 'Hiram', 'Harris', 'Franchesca', 'Estela', 'Chelsy', 'Chela', 'Benton', 'Alisia', 'Tristen', 'Tremayne', 'Tierney', 'Tamekia', 'Nereida', 'Kevan', 'Kattie', 'Deandrea', 'Cassy', 'Carlene', 'Broc', 'Britta', 'Annabel', 'Andra', 'Zechariah', 'Torey', 'Theo', 'Talon', 'Sharika', 'Racine', 'Mckenna', 'Mallori', 'Letisha', 'Keturah', 'Keesha', 'Kathryne', 'Kadie', 'Jarrad', 'Gerry', 'Felica', 'Farah', 'Emery', 'Denice', 'Cyle', 'Corrina', 'Chet', 'Addie', 'Valorie', 'Unique', 'Sherina', 'Shemika', 'Reinaldo', 'Nehemiah', 'Mireya', 'Marylou', 'Marquitta', 'Mariano', 'Malachi', 'Luciano', 'Loreal', 'Latashia', 'Keyona', 'Kalvin', 'Jude', 'Giuseppe', 'Ezequiel', 'Evette', 'Estella', 'Benjamen', 'Barton', 'Antonette', 'Anisha', 'Amina', 'Tamisha', 'Shonta', 'Roslyn', 'Porscha', 'Nydia', 'Montrell', 'Miesha', 'Marcell', 'Leopoldo', 'Lacee', 'Keona', 'Katrice', 'Jarryd', 'Jarett', 'Jacinta', 'Haylee', 'Doreen', 'Cyrstal', 'Catharine', 'Brooklyn', 'Adele', 'Uriah', 'Tiarra', 'Tarin', 'Simeon', 'Russel', 'Rivka', 'Renaldo', 'Patty', 'Norberto', 'Lucretia', 'Lizeth', 'Lilly', 'Lakiesha', 'Jamin', 'Irving', 'Genaro', 'Deondra', 'Danita', 'Carmella', 'Bob', 'Tyisha', 'Tawanda', 'Tameika', 'Shyla', 'Marquetta', 'Lamarcus', 'Kaylyn', 'Kaela', 'Harlan', 'Geri', 'Eliezer', 'Dustan', 'Delvin', 'Dedrick', 'Contessa', 'Chanell', 'Caren', 'Baron', 'Apryl', 'Adalberto', 'Vanna', 'Timmothy', 'Tavon', 'Sheana', 'Shakita', 'Quinten', 'Norris', 'Mirna', 'Mika', 'Meryl', 'Laticia', 'Kendell', 'Kayce', 'Katlin', 'Jefferey', 'Ilene', 'Georgette', 'Ebone', 'Dajuan', 'Britt', 'Berenice', 'Andrae', 'Vannessa', 'Sherrell', 'Sharda', 'Rey', 'Remington', 'Nakisha', 'Monet', 'Milagros', 'Maribeth', 'Lars', 'Kade', 'Jordana', 'Jenise', 'Jenessa', 'Jenee', 'Imelda', 'Christpher', 'Carmelo', 'Aliza', 'Tressa', 'Tavaris', 'Tanna', 'Myrna', 'Mikael', 'Manda', 'Laquanda', 'Lakita', 'Laila', 'Keyonna', 'Keila', 'Kashif', 'Genesis', 'Coleen', 'Anjelica', 'Adrien', 'Shanel', 'Sarita', 'Sabra', 'Rhianna', 'Pia', 'Nickole', 'Michale', 'Mandie', 'Lyssa', 'Lyndsie', 'Lola', 'Leslee', 'Latina', 'Keeley', 'Kane', 'Julien', 'Joanie', 'Jamell', 'Estrella', 'Essence', 'Desirea', 'Cheree', 'Carlyn', 'Caesar', 'Brien', 'Brie', 'Aurelio', 'Anson', 'Alysa', 'Yuri', 'Takisha', 'Reece', 'Rebecka', 'Raymon', 'Ofelia', 'Lissa', 'Leonela', 'Kanisha', 'Jacqulyn', 'Domenic', 'Dino', 'Dewey', 'Dameon', 'Cherry', 'Charde', 'Catlin', 'Cassey', 'Bruno', 'Apollonia', 'Anders', 'Agnes', 'Tou', 'Terrel', 'Shawnte', 'Rashonda', 'Rana', 'Raeann', 'Micahel', 'Mabel', 'Kinsey', 'Karlee', 'Karisa', 'Joseluis', 'Jermain', 'Jerel', 'Jayna', 'Jashua', 'Jameel', 'Ivonne', 'Isela', 'Ibrahim', 'Dusten', 'Dalila', 'Candra', 'Candie', 'Bryn', 'Arnoldo', 'Anibal', 'Yehuda', 'Yasmine', 'Yanira', 'Tomika', 'Terah', 'Shonna', 'Shad', 'Rosio', 'Merissa', 'Martel', 'Marcellus', 'Malika', 'Lilian', 'Lavon', 'Kieran', 'Khadijah', 'Kenyon', 'Kelsy', 'Elva', 'Derrik', 'Dania', 'Danette', 'Dallin', 'Colter', 'Celena', 'Annalisa', 'Alexandre', 'Yahaira', 'Woodrow', 'Triston', 'Tariq', 'Ramone', 'Polly', 'Orion', 'Missy', 'Manuela', 'Madelyn', 'Lizabeth', 'Latonia', 'Lakendra', 'Kyler', 'Kayleen', 'Karmen', 'Kamisha', 'Jerrica', 'Isis', 'Garland', 'Ester', 'Denisse', 'Dedra', 'Corissa', 'Clarice', 'Carie', 'Brodie', 'Blaise', 'Anitra', 'Anissa', 'Alfonzo', 'Aleah', 'Alberta', 'Wiley', 'Viola', 'Valentino', 'Valene', 'Taneshia', 'Tamica', 'Talitha', 'Syed', 'Sherilyn', 'Shawnna', 'Sharell', 'Santanna', 'Patience', 'Nicklaus', 'Nicholle', 'Mustafa', 'Mistie', 'Melony', 'Maile', 'Larisa', 'Joselyn', 'Gage', 'Evangelina', 'Dinah', 'Dimitri', 'Dacia', 'Crysta', 'Cordell', 'Alise', 'Alba', 'Zena', 'Vincenzo', 'Tynisha', 'Thad', 'Tadd', 'Sharron', 'Sammie', 'Rina', 'Reyes', 'Rashaun', 'Misael', 'Minnie', 'Milissa', 'Maryellen', 'Marshal', 'Marcelo', 'Linh', 'Lemuel', 'Leeanne', 'Lanette', 'Kimberlie', 'Karena', 'Josette', 'Jonerik', 'Jerell', 'Jenica', 'Jamilah', 'Jamarcus', 'Huy', 'Everette', 'Enoch', 'Dashawn', 'Christofer', 'Chadrick', 'Cecily', 'Bethann', 'Bartholomew', 'Bambi', 'Amara', 'Alonso', 'Tate', 'Tasheena', 'Tarik', 'Tamela', 'Stefany', 'Star', 'Sedrick', 'Renea', 'Paulo', 'Paolo', 'Otto', 'Nicky', 'Mikki', 'Mica', 'Latrina', 'Karis', 'Kamilah', 'Joycelyn', 'Jolynn', 'Jenell', 'Garth', 'Franco', 'Everardo', 'Ephraim', 'Dontay', 'Destinee', 'Desarae', 'Codie', 'Claribel', 'Christan', 'Buck', 'Brielle', 'Brandice', 'Bert', 'Ayana', 'Amira', 'Adela', 'Windy', 'Tristin', 'Tenesha', 'Tavares', 'Shenita', 'Shawanna', 'Sharif', 'Sallie', 'Rochel', 'Rajiv', 'Mina', 'Mimi', 'Meranda', 'Marquez', 'Larhonda', 'Karlie', 'Jesseca', 'Jerred', 'Indira', 'Eleazar', 'Ebonee', 'Duran', 'Doyle', 'Denae', 'Ciji', 'Charita', 'Charise', 'Carroll', 'Carin', 'Candance', 'Camron', 'Brittnay', 'Bonita', 'Aurelia', 'Addison', 'Abdul', 'Teryn', 'Tatum', 'Taneka', 'Taina', 'Somer', 'Sirena', 'Shantay', 'Sacha', 'Richie', 'Reagan', 'Piper', 'Paloma', 'Nyssa', 'Minh', 'Michela', 'Markeith', 'Marielle', 'Lucio', 'Long', 'Johnmichael', 'Jerica', 'Jackelyn', 'Ishmael', 'Ieshia', 'Hamilton', 'Hal', 'Eldon', 'Della', 'Christoher', 'Chistopher', 'Chasidy', 'Cathrine', 'Cassaundra', 'Candise', 'Brittiany', 'Brittainy', 'Benson', 'Ashanti', 'Angella', 'Tristian', 'Thomasina', 'Terance', 'Sparkle', 'Shonte', 'Shanee', 'Rosalia', 'Roni', 'Moira', 'Melaine', 'Mauro', 'Lavell', 'Lashaunda', 'Laquinta', 'Khalid', 'Katerina', 'Kassidy', 'Karim', 'Judd', 'Jessalyn', 'Jarrel', 'Janee', 'Dusti', 'Debora', 'Dayton', 'Dayne', 'Ciarra', 'Chuck', 'Charis', 'Cammie', 'Brea', 'Anjuli', 'Allegra', 'Zack', 'Yaakov', 'Vidal', 'Toney', 'Terrica', 'Stormie', 'Sherie', 'Shawana', 'Shamekia', 'Rosendo', 'Phuong', 'Peyton', 'Paulina', 'Noreen', 'Nastassja', 'Mykel', 'Miquel', 'Marcello', 'Liz', 'Liane', 'Lasheena', 'Kaylene', 'Jovon', 'Ileana', 'Freeman', 'Elia', 'Dain', 'Crissy', 'Bryana', 'Brienne', 'Viridiana', 'Takeisha', 'Stefano', 'Sherell', 'Samual', 'Samira', 'Rosetta', 'Rosalba', 'Octavius', 'Niccole', 'Miracle', 'Mikayla', 'Margarito', 'Mallary', 'Malerie', 'Leana', 'Lavonda', 'Latavia', 'Kamesha', 'Kacee', 'Juli', 'Grisel', 'Gisela', 'Frederic', 'Edwina', 'Darien', 'Cydney', 'Cindi', 'Carmine', 'Camilo', 'Burton', 'Astrid', 'Antwone', 'Ansley', 'Stevan', 'Sharhonda', 'Sharena', 'Rasheeda', 'Rachal', 'Penelope', 'Oren', 'Omari', 'Neha', 'Montez', 'Melynda', 'Maryam', 'Marlo', 'Marko', 'Marisha', 'Mae', 'Lyndsi', 'Kimberli', 'Keyana', 'Kentrell', 'Katia', 'Julieta', 'Jospeh', 'Hattie', 'Gia', 'Elida', 'Demetra', 'Courtnie', 'Corry', 'Corine', 'Calen', 'Bradlee', 'Anastacia', 'Yazmin', 'Tramaine', 'Tesha', 'Teal', 'Tarek', 'Shontae', 'Shon', 'Shawntae', 'Shanay', 'Roselyn', 'Roel', 'Raynard', 'Ramel', 'Myranda', 'Montana', 'Millicent', 'Lorelei', 'Lisamarie', 'Levon', 'Lesli', 'Lakeya', 'Juliane', 'Jolie', 'Jamika', 'Dustyn', 'Donavon', 'Deonna', 'Corbin', 'Claudette', 'Clair', 'Camden', 'Calli', 'Britnee', 'Brennen', 'Anh', 'Angelic', 'Aidan', 'Zebulon', 'Yusuf', 'Torrie', 'Torrence', 'Tinisha', 'Temeka', 'Tausha', 'Taran', 'Steffany', 'Stanton', 'Shawnda', 'Shatoya', 'Shanequa', 'Shameika', 'Shamar', 'Seamus', 'Rustin', 'Richardo', 'Pilar', 'Natalee', 'Napoleon', 'Nakeisha', 'Malka', 'Lyndi', 'Lorne', 'Leighton', 'Lashondra', 'Karley', 'Kalli', 'Jullian', 'Jennette', 'Giancarlo', 'Garrison', 'Fannie', 'Falisha', 'Ethel', 'Erasmo', 'Denton', 'Carisa', 'Cameo', 'Aviva', 'Annabelle', 'Analisa', 'Yoel', 'Winter', 'Tyshawn', 'Truman', 'Trish', 'Tracee', 'Thuy', 'Tawni', 'Takara', 'Stephine', 'Shiloh', 'Sherwin', 'Shareka', 'Shanise', 'Sabina', 'Royal', 'Rolanda', 'Raleigh', 'Princeton', 'Nena', 'Nastassia', 'Mitzi', 'Milo', 'Micki', 'Merry', 'Meridith', 'Menachem', 'Mckinley', 'Maegen', 'Lorin', 'Lianne', 'Lenny', 'Lamarr', 'Kelby', 'Kandyce', 'Janiece', 'Iman', 'Horacio', 'Hollis', 'Fermin', 'Evangeline', 'Eriberto', 'Denita', 'Demetris', 'Danya', 'Bobbijo', 'Asheley', 'Arika', 'Annamaria', 'Adeline', 'Wilma', 'Tova', 'Stacee', 'Sherena', 'Shantia', 'Roscoe', 'Rodriquez', 'Nikkia', 'Nickolaus', 'Ned', 'Misha', 'Mariko', 'Lavar', 'Lashundra', 'Lashay', 'Lakenya', 'Keanna', 'Jevon', 'Jermel', 'Janina', 'Holland', 'Gideon', 'Eugenio', 'Ernestine', 'Douglass', 'Domonic', 'Desean', 'Delisa', 'Charlton', 'Casondra', 'Bjorn', 'Arlen', 'Alessandro', 'Acacia', 'Trang', 'Thao', 'Taron', 'Shavonda', 'Sharie', 'Shae', 'Scarlet', 'Sari', 'Roxie', 'Risa', 'Rian', 'Renard', 'Reena', 'Reba', 'Rashid', 'Randon', 'Rahul', 'Raelynn', 'Quanisha', 'Pernell', 'Nikolaus', 'Mordechai', 'Mirella', 'Mamie', 'Leeanna', 'Laureen', 'Lateisha', 'Lanita', 'Jovanna', 'Jannette', 'Isha', 'Geraldo', 'Emory', 'Dominica', 'Dimitrios', 'Deonta', 'Denielle', 'Courtland', 'Chirstopher', 'Chelsa', 'Charley', 'Charleen', 'Chardae', 'Channel', 'Britani', 'Autum', 'Audrea', 'Asley', 'Arin', 'Anwar', 'Amar', 'Allana', 'Yitzchok', 'Tj', 'Theodora', 'Terron', 'Terrill', 'Teressa', 'Syreeta', 'Sky', 'Shmuel', 'Shalanda', 'Rosana', 'Ricki', 'Rhoda', 'Rebbecca', 'Raylene', 'Rashard', 'Phong', 'Patti', 'Opal', 'Odell', 'Nidia', 'Nanette', 'My', 'Maryelizabeth', 'Lynsie', 'Lino', 'Lauri', 'Latorya', 'Lashawna', 'Lachelle', 'Keyon', 'Kennedy', 'Keara', 'Jorel', 'Johann', 'Jeron', 'Jennica', 'Jamia', 'Immanuel', 'Homero', 'Germaine', 'Gareth', 'Evonne', 'Evelin', 'Erie', 'Enjoli', 'Devorah', 'Danisha', 'Cliffton', 'Carnell', 'Caley', 'Anamaria', 'Turner', 'Stevi', 'Sahar', 'Rapheal', 'Myisha', 'Merle', 'Martine', 'Malarie', 'Lupita', 'Laurin', 'Krystyna', 'Karolyn', 'Julieann', 'Juancarlos', 'Josua', 'Jaren', 'Jameka', 'Jackeline', 'Jacey', 'Isreal', 'Hasan', 'Gorge', 'Forest', 'Ellie', 'Eamon', 'Dolly', 'Destini', 'Demetrice', 'Christel', 'Charly', 'Chaka', 'Carlotta', 'Caprice', 'Britteny', 'Azucena', 'America', 'Amaris', 'Alonna', 'Ajay', 'Zachry', 'Tyrus', 'Tyeshia', 'Teaira', 'Tavia', 'Stanford', 'Shimon', 'Sarena', 'Ronisha', 'Rojelio', 'Regis', 'Philippe', 'Mya', 'Mikhail', 'Mervin', 'Meggie', 'Matthias', 'Margaux', 'Lexie', 'Lesa', 'Latarsha', 'Lafayette', 'Kristofor', 'Khristopher', 'Khristina', 'Kellan', 'Kedrick', 'Jonpaul', 'Jaymi', 'Jarrid', 'Jarid', 'Glenna', 'Freda', 'Faviola', 'Destin', 'Daina', 'Cristie', 'Clement', 'Celine', 'Byran', 'Benedict', 'Akilah', 'Adelina', 'Abelardo', 'Yisroel', 'Wilmer', 'Weldon', 'Trevon', 'Tito', 'Tiffini', 'Spring', 'Siera', 'Shalena', 'Sami', 'Sage', 'Rueben', 'Rowdy', 'Roshanda', 'Rishi', 'Randee', 'Quenton', 'Qiana', 'Natoya', 'Natassia', 'Nam', 'Mattew', 'Marketta', 'Marika', 'Lenard', 'Layne', 'Lauran', 'Krysti', 'Kiri', 'Kellyann', 'Karah', 'Jules', 'Jewell', 'Jerid', 'Jeb', 'Harriet', 'Halie', 'Gus', 'Geoffery', 'Fausto', 'Eloisa', 'Ean', 'Deante', 'Darion', 'Charlee', 'Carri', 'Brieanna', 'Breeann', 'Ayla', 'Aria', 'Albaro', 'Thanh', 'Tela', 'Shawnee', 'Shaunda', 'Sharice', 'Rylan', 'Rondell', 'Randel', 'Niles', 'Nikhil', 'Nader', 'Mohamad', 'Mechelle', 'Mathias', 'Mateo', 'Markisha', 'Markanthony', 'Mahogany', 'Lolita', 'Leonor', 'Laronda', 'Lanisha', 'Kena', 'Kayli', 'Kateri', 'Kasha', 'Johnetta', 'Jessa', 'Enrico', 'Doug', 'Dorcas', 'Derreck', 'Deanthony', 'Damarcus', 'Cornelia', 'Christophe', 'Christianna', 'Cherrelle', 'Camie', 'Bria', 'Blane', 'Basil', 'Ashlynn', 'Aryn', 'Antron', 'Anjali', 'Alyce', 'Vikram', 'Torrance', 'Tammara', 'Talisa', 'Sherice', 'Shakeya', 'Sequoia', 'Sana', 'Ryanne', 'Reymundo', 'Rebekka', 'Nechama', 'Nacole', 'Milan', 'Merlin', 'Merideth', 'Mercy', 'Linette', 'Lianna', 'Lemar', 'Keren', 'Kenyata', 'Kecia', 'Justyn', 'Jerrid', 'Jeramiah', 'Jamall', 'Jairus', 'Helene', 'Hadassah', 'Gil', 'Fritz', 'Duston', 'Dontrell', 'Diondra', 'Delicia', 'Delano', 'Daria', 'Danilo', 'Conner', 'Clemente', 'Chrisopher', 'China', 'Cherice', 'Cayce', 'Britnie', 'Bonny', 'Ammon', 'Althea', 'Abdullah', 'Zakary', 'Vladimir', 'Tyeisha', 'Twila', 'Treva', 'Tiffney', 'Tenika', 'Telisha', 'Teisha', 'Tarrah', 'Tamira', 'Sheneka', 'Shamara', 'Savana', 'Roshonda', 'Rosalva', 'Refugio', 'Rashelle', 'Pasquale', 'Pa', 'Oswaldo', 'Nathon', 'Melany', 'Megen', 'Marti', 'Makayla', 'Lucero', 'Lizet', 'Linsay', 'Lilliana', 'Latara', 'Lashana', 'Lacresha', 'Kunal', 'Keyanna', 'Kamie', 'Judah', 'Jodee', 'Jobeth', 'Jensen', 'Javan', 'Jaret', 'Jaquan', 'Janea', 'Jamielee', 'Jacalyn', 'Isabelle', 'Hakim', 'Grecia', 'Goldie', 'Foster', 'Diedra', 'Delana', 'Davion', 'Dahlia', 'Constantine', 'Cherilyn', 'Candida', 'Bernie', 'Avraham', 'Aspen', 'Annalee', 'Zahra', 'Willy', 'Vishal', 'Verna', 'Tomi', 'Toccara', 'Thurman', 'Shlomo', 'Sherelle', 'Shania', 'Santino', 'Sanjuanita', 'Rosaura', 'Renato', 'Nyesha', 'Noelia', 'Nanci', 'Mikal', 'Melyssa', 'Markel', 'Marita', 'Marilee', 'Lucien', 'Loriann', 'Loraine', 'Lizzette', 'Lashandra', 'Laramie', 'Lanae', 'Kylene', 'Korie', 'Kenia', 'Justus', 'Jesika', 'Jermiah', 'Jacki', 'Ike', 'Fransisco', 'Emmy', 'Emmalee', 'Edison', 'Eder', 'Dorothea', 'Chiara', 'Charli', 'Charisma', 'Chace', 'Avi', 'Angelena', 'Amee', 'Amador', 'Alyssia', 'Alethea', 'Aj', 'Adriel', 'Adonis', 'Yaritza', 'Vu', 'Tempest', 'Teila', 'Teanna', 'Teala', 'Tavis', 'Steffen', 'Sherese', 'Sharelle', 'Shameeka', 'Shalane', 'Seana', 'Salomon', 'Romel', 'Rhys', 'Rashon', 'Quang', 'Pooja', 'Nilda', 'Nevin', 'Monroe', 'Mikala', 'Marilu', 'Lydell', 'Lekisha', 'Leighanne', 'Lavonne', 'Lavelle', 'Lashanna', 'Laquana', 'Laine', 'Korina', 'King', 'Khalilah', 'Kenesha', 'Kellye', 'Jerrick', 'Jennefer', 'Jennah', 'Jacinto', 'Ina', 'Hilario', 'Fredy', 'Fanny', 'Evans', 'Demetric', 'Delisha', 'Chelsee', 'Ceasar', 'Carlita', 'Carlin', 'Calandra', 'Brynne', 'Barney', 'Barbie', 'Ashia', 'Ambrosia', 'Ambra', 'Amado', 'Alea', 'Aiesha', 'Adriene', 'Yolonda', 'Wes', 'Vinh', 'Terran', 'Tashara', 'Stephane', 'Steffan', 'Sienna', 'Shiquita', 'Shawntay', 'Shauntae', 'Shain', 'Serenity', 'September', 'Selene', 'Sada', 'Ronni', 'Page', 'Nissa', 'Miya', 'Marysol', 'Marivel', 'Makenzie', 'Luigi', 'Lorrie', 'Lorene', 'Lindsie', 'Lateshia', 'Krissy', 'Keonna', 'Jordyn', 'Jorden', 'Jerrel', 'Jerilyn', 'Jennelle', 'Jaquelyn', 'Janett', 'Janetta', 'Jaimi', 'Idalia', 'Huong', 'Hung', 'Gemma', 'Dru', 'Donisha', 'Dione', 'Diona', 'Deangela', 'Darris', 'Cyril', 'Cuong', 'Codey', 'Camila', 'Cally', 'Boris', 'Bilal', 'Annelise', 'Annalise', 'Aletha', 'Zulema', 'Xenia', 'Trung', 'Tessie', 'Taira', 'Shyra', 'Sherrod', 'Shatara', 'Shanetta', 'Shalyn', 'Shaena', 'Season', 'Reilly', 'Rashaad', 'Payton', 'Pang', 'Nerissa', 'Mychael', 'Millie', 'Miguelangel', 'Marlyn', 'Marlen', 'Marlee', 'Markell', 'Manny', 'Major', 'Maghan', 'Magdalene', 'Lyndsy', 'Luiz', 'Lizzie', 'Leesa', 'Kayley', 'Katrena', 'Kasondra', 'Karlene', 'Kanika', 'Kamille', 'Kamal', 'Jonthan', 'Johannah', 'Jenette', 'Jayce', 'Jacquetta', 'Hernan', 'Hai', 'Felicity', 'Fatimah', 'Esequiel', 'Eliana', 'Elba', 'Dyana', 'Donita', 'Deseree', 'Deserae', 'Delmar', 'Delila', 'Deedra', 'Dasha', 'Danille', 'Cristi', 'Cleo', 'Clarisa', 'Christinia', 'Charlette', 'Carmelita', 'Cailin', 'Breon', 'Brandis', 'Barron', 'Artemio', 'Armond', 'Aram', 'Antuan', 'Anand', 'Amin', 'Ambrose', 'Amberlee', 'Alica', 'Aleasha', 'Akia', 'Zach', 'Yessica', 'Yesica', 'Yael', 'Vijay', 'Twyla', 'Trudy', 'Trinidad', 'Trena', 'Tray', 'Trae', 'Tonja', 'Tobin', 'Thor', 'Terese', 'Tandra', 'Tamia', 'Takesha', 'Tai', 'Shawntel', 'Shanea', 'Shamia', 'Shalana', 'Santina', 'Saira', 'Ryon', 'Roxane', 'Rowena', 'Rohan', 'Robinson', 'Rami', 'Quan', 'Porfirio', 'Patrisha', 'Odessa', 'Nova', 'Melia', 'Marin', 'Mariaelena', 'Malory', 'Mallery', 'Malisa', 'Lupe', 'Lindi', 'Lexi', 'Lamonte', 'Laketa', 'Kyndra', 'Kwame', 'Krystie', 'Keriann', 'Kerianne', 'Kanesha', 'Joanthan', 'Jeremi', 'Jelani', 'Jase', 'Jamarr', 'Fabio', 'Ernestina', 'Duy', 'Dori', 'Domenico', 'Dionte', 'Derwin', 'Daryn', 'Cheyne', 'Cherri', 'Bronwyn', 'Brittini', 'Britny', 'Brieanne', 'Bevin', 'Beronica', 'Benjiman', 'Avis', 'Arash', 'Antwaun', 'Anneliese', 'Angelle', 'Andreana', 'Alix', 'Aleesha', 'Zakiya', 'Yves', 'Yasmeen', 'Velvet', 'Valeri', 'Trumaine', 'Tifany', 'Terica', 'Teresita', 'Teodoro', 'Socorro', 'Shiela', 'Sheridan', 'Shaquanna', 'Shamel', 'Seanna', 'Rosita', 'Renisha', 'Rebeka', 'Rebeccah', 'Quoc', 'Puja', 'Parris', 'Nikolaos', 'Neda', 'Muriel', 'Meg', 'Markesha', 'Marinda', 'Marietta', 'Mariann', 'Marcial', 'Mac', 'Lorina', 'Lon', 'Liberty', 'Lesly', 'Lekeisha', 'Leander', 'Latoshia', 'Lasandra', 'Kieth', 'Karlyn', 'Kaelyn', 'Jourdan', 'Joellen', 'Jenine', 'Janay', 'Jacque', 'Ivelisse', 'Imran', 'Hieu', 'Haydee', 'Garet', 'Erma', 'Demetrio', 'Dawna', 'Darek', 'Curtiss', 'Criselda', 'Christos', 'Christianne', 'Cheyanne', 'Cherita', 'Cheng', 'Chas', 'Carolynn', 'Carmel', 'Bud', 'Antone', 'Anglea', 'Zandra', 'Willow', 'Trevis', 'Tiffiney', 'Tempestt', 'Teara', 'Tayler', 'Talina', 'Takiyah', 'Tacara', 'Sunni', 'Soraya', 'Soledad', 'Slade', 'Shereen', 'Shantrell', 'Shannah', 'Shaneika', 'Ruthie', 'Rubin', 'Rosalina', 'Robb', 'Ranae', 'Raeanne', 'Orrin', 'Nubia', 'Nicklas', 'Nichols', 'Natasia', 'Myriam', 'Mirian', 'Maximo', 'Marino', 'Magda', 'Magaly', 'Lisbeth', 'Kriston', 'Kole', 'Kipp', 'Kenzie', 'Kaylynn', 'Katarina', 'Kalia', 'January', 'Jajuan', 'Isai', 'Imani', 'Hakeem', 'Genie', 'Faustino', 'Evita', 'Erikka', 'Eboney', 'Dwain', 'Duke', 'Dov', 'Dennise', 'Daysha', 'Danyale', 'Dannie', 'Daisha', 'Cherrie', 'Cecile', 'Carleen', 'Cal', 'Brantley', 'Berry', 'Axel', 'Audry', 'Amiee', 'Abbigail', 'Abbi', 'Zacharia', 'Yousef', 'Yara', 'Yancy', 'Xochitl', 'Wilton', 'Vincente', 'Velma', 'Tam', 'Stephannie', 'Shedrick', 'Shavone', 'Sharmaine', 'Shannel', 'Rasheen', 'Rasheda', 'Oralia', 'Ophelia', 'Ollie', 'Nekia', 'Mikeal', 'Maryjane', 'Malina', 'Lisha', 'Leora', 'Lauro', 'Lasonya', 'Laina', 'Konrad', 'Koby', 'Keva', 'Kerra', 'Kendric', 'Karra', 'Kalina', 'Joannie', 'Janey', 'Jamilla', 'Jamieson', 'Jaci', 'Ikea', 'Herlinda', 'Gerri', 'Geremy', 'Franklyn', 'Ferdinand', 'Felton', 'Elio', 'Edmundo', 'Darrion', 'Darcey', 'Daquan', 'Daivd', 'Daiel', 'Courtni', 'Cardell', 'Cain', 'Bryna', 'Brittiny', 'Bradon', 'Augustus', 'Augusta', 'Arnaldo', 'Arik', 'Angus', 'Ameer', 'Ambar', 'Amanada', 'Alva', 'Allyssa', 'Alida', 'Woody', 'Winfred', 'Von', 'Viet', 'Tynesha', 'Torri', 'Tonika', 'Tionna', 'Tiffiany', 'Thu', 'Terrin', 'Tavarus', 'Tarell', 'Suzie', 'Sumer', 'Stetson', 'Silvestre', 'Sharae', 'Shanique', 'Russ', 'Rosalee', 'Ronnell', 'Ronica', 'Reginal', 'Rania', 'Quintina', 'Orville', 'Ora', 'Nycole', 'Nola', 'Niya', 'Nita', 'Nikisha', 'Matilda', 'Mathieu', 'Marykate', 'Maryjo', 'Malcom', 'Macy', 'Lelia', 'Leandre', 'Lashae', 'Larae', 'Krystine', 'Kristyna', 'Korin', 'Kennard', 'Kenan', 'Kelcie', 'Kary', 'Kandy', 'Kalisha', 'Kailee', 'Julienne', 'Jessyca', 'Jerrett', 'Jennalee', 'Jannie', 'Janita', 'Jacquelyne', 'Isabella', 'Hosea', 'Henri', 'Hailee', 'Gabino', 'Elisabet', 'Edgard', 'Dung', 'Demetrios', 'Dawson', 'Creighton', 'Corwin', 'Chavis', 'Chantay', 'Boone', 'Barbra', 'Asma', 'Aris', 'Ariella', 'Antonella', 'Alfreda', 'Aislinn', 'Williams', 'Ward', 'Vasiliki', 'Valentine', 'Trishia', 'Tequilla', 'Temika', 'Tabbatha', 'Son', 'Sloane', 'Sima', 'Shondra', 'Sheronda', 'Shaundra', 'Shardai', 'Shaquanda', 'Shanti', 'Shandy', 'Shadonna', 'Shade', 'Rochell', 'Porcha', 'Patricio', 'Patrica', 'Pascual', 'Obed', 'Myeisha', 'Miki', 'Migel', 'Micky', 'Maximillian', 'Marquel', 'Markeisha', 'Maisha', 'Lona', 'Leron', 'Lenore', 'Laquetta', 'Kristiana', 'Konstantinos', 'Kong', 'Kodi', 'Kenda', 'Kc', 'Kaycie', 'Kathlyn', 'Katherin', 'Kandra', 'Julee', 'Joshue', 'Joeseph', 'Jessee', 'Jennilee', 'Jeanetta', 'Jeanelle', 'Jannet', 'Janielle', 'Jacqualine', 'Haleigh', 'Graig', 'Francois', 'Florentino', 'Essie', 'Emile', 'Emely', 'Ely', 'Dwan', 'Dudley', 'Domenique', 'Demetri', 'Dax', 'Davita', 'Darcel', 'Damar', 'Christiane', 'Chirag', 'Charleston', 'Chaquita', 'Cecilio', 'Catie', 'Cassandre', 'Breeanna', 'Branson', 'Avrohom', 'Augustin', 'Aryeh', 'Armen', 'Angelika', 'Alysse', 'Zoila', 'Zenobia', 'Yocheved', 'Yen', 'Winnie', 'Vinson', 'Torie', 'Timika', 'Tenille', 'Tashika', 'Takeshia', 'Sybil', 'Stepanie', 'Stefania', 'Shelbie', 'Shauntel', 'Shauntay', 'Shaniece', 'Shalina', 'Sampson', 'Ruthann', 'Rubi', 'Rosamaria', 'Remy', 'Rance', 'Raelene', 'Priscila', 'Porshia', 'Parrish', 'Orin', 'Nils', 'Nikolai', 'Neftali', 'Natacha', 'Myeshia', 'Megann', 'Mecca', 'Marnie', 'Marketa', 'Marguita', 'Margret', 'Magali', 'Maeve', 'Lindsi', 'Leobardo', 'Leena', 'Lakeysha', 'Lakeitha', 'Lakeesha', 'Kirt', 'Kimberely', 'Kianna', 'Kerstin', 'Kelle', 'Kaylen', 'Katharina', 'Kalynn', 'Ka', 'Justice', 'Julieanne', 'Jousha', 'Johan', 'Jina', 'Jihan', 'Jenalee', 'Jeanmarie', 'Jasma', 'Jaryd', 'Jarel', 'Jamaica', 'Jacky', 'Hoang', 'Grover', 'Franky', 'Flavio', 'Fay', 'Dominigue', 'Domenica', 'Destiney', 'Desiray', 'Denna', 'Cy', 'Courtnee', 'Claudine', 'Cicely', 'Christon', 'Chimere', 'Chenoa', 'Chava', 'Channa', 'Celso', 'Catrice', 'Casi', 'Camillia', 'Camellia', 'Brisa', 'Braulio', 'Booker', 'Bentley', 'Artis', 'Arleen', 'Ammie', 'Amethyst', 'Allisha', 'Ace', 'Zipporah', 'Zara', 'Webster', 'Tyquan', 'Tyana', 'Terika', 'Tawnie', 'Tatianna', 'Tashana', 'Stormi', 'Soren', 'Sheria', 'Shalene', 'Shalee', 'Shakera', 'Roque', 'Ren', 'Rebekkah', 'Raychel', 'Rafeal', 'Prentiss', 'Prentice', 'Porter', 'Patrina', 'Osama', 'Nikkie', 'Nicolaus', 'Nicholis', 'Neva', 'Neel', 'Nathaly', 'Nakeya', 'Nakesha', 'Murray', 'Mira', 'Merrick', 'Mendy', 'Meisha', 'Maximino', 'Marquell', 'Malena', 'Lucus', 'Lucila', 'London', 'Linwood', 'Lezlie', 'Levar', 'Lauralee', 'Lataya', 'Laquan', 'Kermit', 'Kelton', 'Kavita', 'Katara', 'Jovita', 'Jerron', 'Javaris', 'Jaquita', 'Jansen', 'Jamillah', 'Jai', 'Jahaira', 'Jacquelene', 'Hershel', 'Greyson', 'Giorgio', 'Geroge', 'Gayla', 'Filiberto', 'Emmitt', 'Emiliano', 'Eliyahu', 'Elisia', 'Elie', 'Elgin', 'Dona', 'Devona', 'Derric', 'Deontae', 'Demitrius', 'Deja', 'Dee', 'Crystalyn', 'Cortnie', 'Corrin', 'Concepcion', 'Chasen', 'Chari', 'Cason', 'Case', 'Caridad', 'Caressa', 'Camelia', 'Cagney', 'Brandilyn', 'Bobbiejo', 'Blayne', 'Benjamine', 'Bao', 'Areli', 'Anil', 'Angle', 'Analicia', 'Ambre', 'Amada', 'Allyn', 'Aleta', 'Adena', 'Abner', 'Zachari', 'Yannick', 'Wesly', 'Vonda', 'Vivek', 'Veronique', 'Vernell', 'Tyran', 'Toshia', 'Torin', 'Toniann', 'Tobi', 'Timeka', 'Teagan', 'Tashawna', 'Tanja', 'Suzan', 'Stoney', 'Stan', 'Shona', 'Sheniqua', 'Sharod', 'Shareena', 'Shan', 'Shanica', 'Shamica', 'Sedric', 'Sarabeth', 'Samia', 'Samer', 'Saba', 'Rasheem', 'Ransom', 'Rani', 'Osbaldo', 'Nima', 'Nicol', 'Nicholes', 'Neena', 'Nedra', 'Milena', 'Migdalia', 'Micha', 'Meng', 'Marquisha', 'Marni', 'Markia', 'Lucius', 'Luciana', 'Lisandra', 'Liesl', 'Letisia', 'Lanesha', 'Lamonica', 'La', 'Ladarius', 'Lace', 'Kyleen', 'Khadija', 'Kezia', 'Keyla', 'Kenji', 'Katharyn', 'Kasia', 'Karianne', 'Jorje', 'Johnie', 'Johnathen', 'Johna', 'Job', 'Jestin', 'Jerold', 'Jeramey', 'Jenice', 'Jasn', 'Jannelle', 'Jamica', 'Irwin', 'Hoyt', 'Hilton', 'Henrietta', 'Heidy', 'Gricelda', 'Gisselle', 'Gerson', 'Gaston', 'Frieda', 'Fredric', 'Elizebeth', 'Eligio', 'Edlin', 'Dujuan', 'Djuan', 'Diedre', 'Deshon', 'Denetra', 'Demar', 'Deisy', 'Daven', 'Dathan', 'Cordelia', 'Chanta', 'Carman', 'Carletta', 'Calista', 'Brion', 'Barret', 'Aziza', 'Aura', 'Aramis', 'Apollo', 'Anthoney', 'Anny', 'Annah', 'Amamda', 'Allisa', 'Adelaide', 'Abra', 'Aarron', 'Yusef', 'Young', 'Willaim', 'Vinay', 'Vilma', 'Vasilios', 'Tyneshia', 'Tyne', 'Tuesday', 'Trevin', 'Treasure', 'Tinesha', 'Tawnee', 'Tarrell', 'Tan', 'Tanishia', 'Taniesha', 'Tameeka', 'Talena', 'Taj', 'Tabbitha', 'Stepahnie', 'Soleil', 'Siri', 'Shontay', 'Sharese', 'Shareef', 'Shannen', 'Shaine', 'Shadae', 'Seneca', 'Sarrah', 'Sammuel', 'Samanatha', 'Sal', 'Rob', 'Riva', 'Rhyan', 'Randle', 'Randie', 'Modesto', 'Melissia', 'Matias', 'Massiel', 'Marlaina', 'Malori', 'Lynelle', 'Loyd', 'Loryn', 'Lorissa', 'Lorinda', 'Loan', 'Lizett', 'Latora', 'Lashaun', 'Lakin', 'Krystyn', 'Krystale', 'Kou', 'Kirstie', 'Kirkland', 'Kingsley', 'Khoa', 'Kerwin', 'Keondra', 'Kendyl', 'Kelsea', 'Kaye', 'Kawana', 'Kathlene', 'Karoline', 'Kalena', 'Kailyn', 'Jushua', 'Josephina', 'Jori', 'Jeanpaul', 'Jasmyne', 'Janmichael', 'Jamesha', 'Jamaine', 'Iva', 'Isaura', 'Iain', 'Hussein', 'Heaven', 'Guillermina', 'Fernanda', 'Favian', 'Evin', 'Eusebio', 'Endia', 'Ember', 'Eloise', 'Elesha', 'Domenick', 'Dia', 'Delonte', 'Deeanna', 'Dayana', 'Daneil', 'Dagoberto', 'Cortni', 'Cinnamon', 'Christena', 'Chevonne', 'Celestina', 'Celenia', 'Cash', 'Capri', 'Cambria', 'Calie', 'Bretton', 'Becki', 'Audrie', 'Aubry', 'An', 'Anisa', 'Anessa', 'Amirah', 'Akira', 'Ainsley', 'Aerial', 'Yarenis', 'Wm', 'Whitnee', 'Vannesa', 'Torian', 'Topacio', 'Tinamarie', 'Thera', 'Termaine', 'Terin', 'Tennille', 'Tena', 'Telia', 'Tarryn', 'Tamyra', 'Stevenson', 'Sloan', 'Simona', 'Shivani', 'Shereka', 'Shaye', 'Sharia', 'Seema', 'Santa', 'Sanjay', 'Sang', 'Sandeep', 'Sammi', 'Sameer', 'Sabrena', 'Rudolfo', 'Rogers', 'Rod', 'Rima', 'Regine', 'Reco', 'Rashell', 'Queena', 'Phil', 'Pheng', 'Patric', 'Obrian', 'Norah', 'Noor', 'Neisha', 'Narciso', 'Naquita', 'Mehgan', 'Marya', 'Marque', 'Lynnsey', 'Lucie', 'Lotoya', 'Liset', 'Ligia', 'Leisha', 'Leisa', 'Layton', 'Laren', 'Lan', 'Kyesha', 'Kiona', 'Kerin', 'Keoni', 'Kathie', 'Kassy', 'Kassondra', 'Kasheena', 'Kamara', 'Jovany', 'Joshawa', 'Jenea', 'Jd', 'Jasmaine', 'Janika', 'Jamye', 'Jael', 'Herschel', 'Geronimo', 'Gentry', 'Gennifer', 'Garren', 'Estelle', 'Ehren', 'Ed', 'Eben', 'Detrick', 'Derell', 'Dequan', 'Deloris', 'Delfina', 'Delaney', 'Decarlos', 'Davy', 'Danesha', 'Dandrea', 'Coretta', 'Collins', 'Chelse', 'Chantae', 'Briann', 'Brayden', 'Brande', 'Audie', 'Antwoine', 'Antwaine', 'Antjuan', 'Andriana', 'Allicia', 'Aarika', 'Zenaida', 'Zebadiah', 'Willian', 'Vernita', 'Tira', 'Thalia', 'Stephania', 'Steffani', 'Shirin', 'Shireen', 'Shilo', 'Sherica', 'Shelbi', 'Shareese', 'Shareen', 'Shantavia', 'Shakima', 'Serene', 'Sena', 'Sebrina', 'Sanford', 'Sahara', 'Ryane', 'Riki', 'Ricci', 'Rheanna', 'Rayvon', 'Rahim', 'Olin', 'Norbert', 'Noble', 'Nida', 'Nicholus', 'Nicholette', 'Nadirah', 'Nabil', 'Montoya', 'Mesha', 'Merrill', 'Mariya', 'Maggi', 'Lynsi', 'Lien', 'Leandro', 'Lavren', 'Latika', 'Lashea', 'Laquitta', 'Laquesha', 'Lakecia', 'Kye', 'Koren', 'Khalif', 'Kennisha', 'Kayle', 'Kaydee', 'Katya', 'Kathyrn', 'Karry', 'Karlos', 'Karalyn', 'Kalin', 'Kalan', 'Kadi', 'Jovani', 'Jonothan', 'Johnthan', 'Jihad', 'Jessamyn', 'Jerone', 'Jasmyn', 'Jaquetta', 'Janene', 'Jamario', 'Jaden', 'Jacqlyn', 'Jacelyn', 'Ines', 'Idris', 'Hudson', 'Ginamarie', 'Felisa', 'Falyn', 'Elspeth', 'Dovid', 'Devaughn', 'Desmon', 'Denika', 'Darnisha', 'Daneille', 'Damein', 'Courtenay', 'Concetta', 'Clarke', 'Cieara', 'Christipher', 'Chauncy', 'Cady', 'Brina', 'Brando', 'Blaze', 'Bess', 'Bartley', 'Ayisha', 'Arsenio', 'Arian', 'Arely', 'Appollonia', 'Ankur', 'Aminah', 'Ambria', 'Alta', 'Aliyah', 'Aliya', 'Aliesha', 'Adrea', 'Aden', 'Abe', 'Zoraida', 'Zina', 'Ubaldo', 'Tzvi', 'Timberly', 'Tiffeny', 'Tifani', 'Tesa', 'Terina', 'Teneshia', 'Teah', 'Tayna', 'Taya', 'Tawna', 'Taurus', 'Tatyana', 'Tamarra', 'Tamarah', 'Synthia', 'Sunnie', 'Shekinah', 'Shantal', 'Shanette', 'Shalynn', 'Shakina', 'Shakara', 'Shaila', 'Shada', 'Salim', 'Ryder', 'Rosalynn', 'Rolland', 'Richmond', 'Ricco', 'Reema', 'Rasheena', 'Ramond', 'Quianna', 'Priyanka', 'Prisma', 'Porche', 'Pennie', 'Nikkole', 'Nga', 'Nereyda', 'Nakeshia', 'Nadya', 'Montreal', 'Martinez', 'Marlina', 'Maeghan', 'Lyman', 'Lyla', 'Lonny', 'Linzy', 'Leonora', 'Lean', 'Lavina', 'Latrese', 'Laney', 'Laneisha', 'Landen', 'Lakeia', 'Kortni', 'Kellianne', 'Kelci', 'Keana', 'Kaylea', 'Kawika', 'Katiria', 'Katee', 'Justo', 'Josefa', 'Jessicca', 'Jessey', 'Jera', 'Jens', 'Jennell', 'Jene', 'Jaymee', 'Jayla', 'Jawaan', 'Jarren', 'Janean', 'Jameelah', 'Jair', 'Jacy', 'Jacie', 'Honey', 'Haylie', 'Halle', 'Hali', 'Gray', 'Gerren', 'Gerad', 'Georgios', 'Franz', 'Faisal', 'Emelia', 'Elroy', 'Eladio', 'Dwaine', 'Devora', 'Deondre', 'Dennie', 'Denesha', 'Denard', 'Demetrious', 'Delorean', 'Dejon', 'Davey', 'Danniel', 'Colten', 'Chrystina', 'Christyna', 'Christle', 'Cherisse', 'Chavon', 'Charmayne', 'Carleton', 'Brodrick', 'Brieann', 'Brennon', 'Blas', 'Billiejo', 'Bijan', 'Benzion', 'Aubri', 'Atiya', 'Ashwin', 'Ashle', 'Aretha', 'Alonza', 'Allena', 'Aline', 'Akil', 'Aide', 'Zainab', 'Zaida', 'Wynter', 'Wiliam', 'Wendall', 'Vy', 'Vi', 'Vashti', 'Umar', 'Tywan', 'Tyjuan', 'Tyiesha', 'Tyanna', 'Trinh', 'Tran', 'Tommi', 'Toan', 'Tiona', 'Thane', 'Thai', 'Teon', 'Teona', 'Tarsha', 'Tambra', 'Talya', 'Stasha', 'Silver', 'Shunta', 'Shericka', 'Shaylyn', 'Shavonna', 'Sharisse', 'Shaquetta', 'Shaneeka', 'Shakela', 'Shadia', 'Sapna', 'Ronna', 'Rohit', 'Robbin', 'Rishawn', 'Reynold', 'Reem', 'Rayn', 'Raelyn', 'Paulino', 'Passion', 'Palmer', 'Nykia', 'Nyisha', 'Necole', 'Natalya', 'Myriah', 'Murphy', 'Monisha', 'Marrissa', 'Marquette', 'Markie', 'Marcelina', 'Lucian', 'Lottie', 'Leyla', 'Lemarcus', 'Lawren', 'Lawanna', 'Latasia', 'Lashanta', 'Landis', 'Kristena', 'Kit', 'Kile', 'Kerrin', 'Kela', 'Kathrina', 'Juventino', 'Jonathen', 'Johndavid', 'Joella', 'Jinny', 'Jerard', 'Jennipher', 'Jaysen', 'Jantzen', 'Janisha', 'Jamese', 'Ivana', 'Inga', 'Ha', 'Graeme', 'Giovani', 'Giles', 'Gilda', 'Geno', 'Falicia', 'Faigy', 'Enid', 'Enedina', 'Elysha', 'Elizabet', 'Elan', 'Ebonique', 'Dyan', 'Donya', 'Dimas', 'Dezmond', 'Devyn', 'Derron', 'Del', 'Deedee', 'Dannette', 'Damiano', 'Dakotah', 'Corrinne', 'Corin', 'Chip', 'Chevy', 'Chavonne', 'Carrington', 'Carra', 'Breck', 'Blain', 'Bernardino', 'Baltazar', 'Arjun', 'Arelis', 'Araseli', 'Aquila', 'Any', 'Antonino', 'Annaliese', 'Anja', 'Anesha', 'Anel', 'Anamarie', 'Amberle', 'Agatha', 'Yoana', 'Yer', 'Yancey', 'Yakov', 'Wardell', 'Valery', 'Tyrese', 'Tyreese', 'Tonie', 'Tifanie', 'Thaddaeus', 'Teran', 'Tenia', 'Tayla', 'Tashauna', 'Tanita', 'Taneesha', 'Tanaya', 'Spenser', 'Sione', 'Siara', 'Shontel', 'Sherise', 'Shant', 'Shamira', 'Serge', 'Sascha', 'Saida', 'Sagar', 'Ryland', 'Ronaldo', 'Robynn', 'Robbi', 'Ritchie', 'Rion', 'Ria', 'Rebbie', 'Raynaldo', 'Raj', 'Quincey', 'Pietro', 'Payal', 'Panagiotis', 'Pamala', 'Osiel', 'Octavious', 'Nino', 'Nikesha', 'Nell', 'Neely', 'Nash', 'Myia', 'Montrel', 'Melvina', 'Melisha', 'Marvell', 'Marice', 'Marchelle', 'Mandee', 'Mahmoud', 'Louann', 'Lilibeth', 'Letha', 'Len', 'Leda', 'Lazarus', 'Latroy', 'Latrece', 'Latishia', 'Lasondra', 'Lashaundra', 'Laquandra', 'Krystalyn', 'Krisha', 'Kina', 'Keil', 'Kedra', 'Katisha', 'Kamron', 'Kally', 'Kaleen', 'Kalani', 'Kaitlynn', 'Justino', 'Julisa', 'Juanmanuel', 'Josey', 'Joscelyn', 'Jonte', 'Jett', 'Jerrold', 'Jermy', 'Jc', 'Jazmyn', 'Jara', 'Jamy', 'Jamon', 'Jakia', 'Jaison', 'Jacobi', 'Ivey', 'Indya', 'Hong', 'Hoa', 'Halee', 'Glendon', 'Gitty', 'Gabriele', 'Francheska', 'Florencio', 'Felicita', 'Felice', 'Errin', 'Ellyn', 'Edson', 'Dorthy', 'Dontavious', 'Devlin', 'Detra', 'Demonte', 'Delvon', 'Darleen', 'Damita', 'Damen', 'Crystina', 'Courtnay', 'Correy', 'Corinthia', 'Coreen', 'Corby', 'Christyn', 'Christiaan', 'Chi', 'Chevon', 'Chenelle', 'Chaunte', 'Charlena', 'Charday', 'Chara', 'Chaise', 'Ceara', 'Catelyn', 'Carolann', 'Burke', 'Buford', 'Brittanny', 'Blakely', 'Binh', 'Berta', 'Baldemar', 'Ashish', 'Arun', 'Ani', 'Andera', 'Amarilis', 'Alphonse', 'Adriann', 'Addam', 'Zev', 'Zacharias', 'Yecenia', 'Yalonda', 'Winona', 'Willa', 'Veronika', 'Vernard', 'Venita', 'Tyla', 'Toi', 'Tirzah', 'Tiffanee', 'Teng', 'Tekia', 'Tavoris', 'Tashena', 'Tarren', 'Tameisha', 'Shoua', 'Sherrill', 'Sheng', 'Shaquan', 'Shalon', 'Shaketa', 'Shakeena', 'Servando', 'Saleem', 'Saeed', 'Sabine', 'Saad', 'Rufino', 'Rosina', 'Romona', 'Romero', 'Rianna', 'Renika', 'Rabecca', 'Quanita', 'Promise', 'Oriana', 'Ondrea', 'Olympia', 'Nate', 'Natassja', 'Narissa', 'Naquan', 'Nailah', 'Morgen', 'Miriah', 'Mikelle', 'Mick', 'Merritt', 'Mele', 'Meera', 'Medina', 'Meagon', 'Marvis', 'Marva', 'Marly', 'Marchello', 'Marcelle', 'Manisha', 'Maha', 'Madalyn', 'Machelle', 'Lucky', 'Luca', 'Luann', 'Lorianne', 'Lili', 'Lavinia', 'Lashell', 'Laree', 'Lanny', 'Lacinda', 'Kristeen', 'Korinne', 'Kitty', 'Kimberlyn', 'Katrin', 'Karlton', 'Kahlil', 'Justn', 'Joya', 'Josuha', 'Jordanna', 'Jonie', 'Jonica', 'Joline', 'Johnell', 'Jennine', 'Jazzmin', 'Jasmina', 'Jannifer', 'Jamelia', 'Jae', 'Jacklynn', 'Hadley', 'Gunnar', 'Greer', 'Godfrey', 'Geovanni', 'Garron', 'Gaetano', 'Frantz', 'Feliciano', 'Errick', 'Erlinda', 'Efrem', 'Dyanna', 'Dreama', 'Dottie', 'Dionicio', 'Dewitt', 'Desi', 'Derry', 'Delton', 'Daryle', 'Daphney', 'Danell', 'Daielle', 'Crystel', 'Consuela', 'Christoffer', 'Christene', 'Charlyn', 'Cass', 'Cassia', 'Carrissa', 'Carolyne', 'Carlisa', 'Caitlan', 'Bryanne', 'Brenten', 'Blanche', 'Bella', 'Bee', 'Aysha', 'Athanasios', 'Ashey', 'Arvin', 'Arick', 'Anselmo', 'Anndrea', 'Angele', 'Andree', 'Amrita', 'Alyshia', 'Alexsandra', 'Alexi', 'Aleece', 'Adams', 'Abran', 'Abdiel', 'Zakia', 'Yehoshua', 'Xochilt', 'Wylie', 'West', 'Wally', 'Waleed', 'Vikki', 'Vern', 'Tywon', 'Tywanna', 'Tysen', 'Tyrice', 'Tila', 'Tiffay', 'Terrah', 'Teia', 'Tarina', 'Tanea', 'Tamieka', 'Tamala', 'Talesha', 'Takeya', 'Tacarra', 'Suzy', 'Suzannah', 'Sully', 'Sulema', 'Sueann', 'Sneha', 'Sindy', 'Sherida', 'Shelita', 'Shaunice', 'Sharifa', 'Shantee', 'Shannell', 'Shakema', 'Shabnam', 'Serita', 'Seirra', 'Romina', 'Rio', 'Riccardo', 'Riana', 'Rayanna', 'Phaedra', 'Ozzie', 'Ontario', 'Omer', 'Olajuwon', 'Obryan', 'Nikola', 'Nastasha', 'Najah', 'Naisha', 'Naim', 'Naima', 'Mysti', 'Montgomery', 'Mindie', 'Mila', 'Michella', 'Micheala', 'Meleah', 'Mayer', 'Martisha', 'Marshay', 'Marlow', 'Maricella', 'Marcoantonio', 'Makia', 'Mahlon', 'Macario', 'Lysandra', 'Lynell', 'Lyndell', 'Lura', 'Lula', 'Linzi', 'Les', 'Lateefah', 'Lashelle', 'Larita', 'Laqueta', 'Laquanta', 'Lachandra', 'Ky', 'Kofi', 'Kevon', 'Kervin', 'Kenyada', 'Kenrick', 'Kendale', 'Keane', 'Kayci', 'Kassey', 'Karon', 'Kamaria', 'Kaisha', 'Jovanny', 'Joslin', 'Jonny', 'Jonnie', 'Jona', 'Jocelynn', 'Jermell', 'Jazzmine', 'Jaylene', 'Janeth', 'Janai', 'Jame', 'Jamelle', 'Jameela', 'Isabell', 'Irasema', 'Ieisha', 'Hanh', 'Gerrod', 'Fidencio', 'Faron', 'Evelia', 'Etienne', 'Estefania', 'Esau', 'Elma', 'Efraim', 'Drue', 'Despina', 'Demetrick', 'Dashaun', 'Darryll', 'Damario', 'Damara', 'Corena', 'Conrado', 'Choua', 'Chau', 'Charelle', 'Charee', 'Channon', 'Chan', 'Chancey', 'Caylin', 'Cassidi', 'Carlye', 'Carlina', 'Carlena', 'Brynna', 'Britanny', 'Brionna', 'Branda', 'Bowen', 'Bethani', 'Beatris', 'Bari', 'Aviance', 'Auston', 'Arman', 'Arlo', 'Arcelia', 'Ara', 'Antonie', 'Ansel', 'Annetta', 'Ananda', 'Ambrea', 'Amal', 'Allysa', 'Alicea', 'Alexandros', 'Adair', 'Abagail', 'Zulma', 'Zakiyyah', 'Wayland', 'Warner', 'Valente', 'Tyrome', 'Turquoise', 'Tron', 'Tristina', 'Triana', 'Trenten', 'Tovah', 'Torry', 'Tod', 'Timohty', 'Thurston', 'Terria', 'Teana', 'Tandi', 'Tamatha', 'Tali', 'Stevens', 'Stephone', 'Stephnie', 'Sorangel', 'Shirelle', 'Shila', 'Sheela', 'Sheba', 'Shaw', 'Sharyn', 'Sharona', 'Sharleen', 'Shalita', 'Shalini', 'Shaleen', 'Serjio', 'Sarra', 'Samnang', 'Safiya', 'Rosangela', 'Rona', 'Ravin', 'Rasheedah', 'Rafaela', 'Raeanna', 'Paxton', 'Pat', 'Oswald', 'Nettie', 'Nefertiti', 'Nayeli', 'Nada', 'Molli', 'Mickie', 'Michaella', 'Melania', 'Meir', 'Maynard', 'Matthews', 'Matteo', 'Marybel', 'Marilynn', 'Margeaux', 'Lynna', 'Lynae', 'Lorenza', 'Linden', 'Leyna', 'Lennie', 'Leandrea', 'Lawerence', 'Laverne', 'Launa', 'Lashayla', 'Lamario', 'Lakendrick', 'Lael', 'Lacrisha', 'Lacrecia', 'Korrie', 'Kolt', 'Klye', 'Klayton', 'Khaled', 'Kerriann', 'Kennon', 'Kennetha', 'Kelcey', 'Keitha', 'Keia', 'Kathi', 'Karine', 'Karey', 'Kareema', 'Karalee', 'Kamran', 'Kalah', 'Julietta', 'Josha', 'Jorie', 'Jonell', 'Jonatha', 'Jolyn', 'Jessia', 'Jermane', 'Jemel', 'Janese', 'Janaya', 'Jadon', 'Jacobo', 'Isac', 'Hristopher', 'Hillery', 'Hansel', 'Gustave', 'Golda', 'Gianni', 'Geralyn', 'Genny', 'Gema', 'Gavriel', 'Garin', 'Gale', 'Fong', 'Evie', 'Ever', 'Evelina', 'Estrellita', 'Ernst', 'Ellery', 'Effie', 'Dorinda', 'Dontez', 'Donica', 'Donelle', 'Donato', 'Devina', 'Desaray', 'Deniece', 'Demon', 'Debby', 'Deadra', 'Davie', 'Darryn', 'Darah', 'Danni', 'Crosby', 'Corvette', 'Cipriano', 'Cinthya', 'Chrystle', 'Che', 'Charline', 'Chancy', 'Caterina', 'Camisha', 'Calin', 'Brittanee', 'Brigham', 'Breona', 'Brandalyn', 'Bracha', 'Baruch', 'Atthew', 'Antwuan', 'Antonina', 'Annabell', 'Andreia', 'Andi', 'Aman', 'Aleida', 'Adolphus', 'Adia', 'Abigale', 'Abbe', 'Zachory', 'Yalitza', 'Whitnie', 'Wendie', 'Walton', 'Virgilio', 'Vianca', 'Verenice', 'Vaness', 'Tresa', 'Tien', 'Thien', 'Theodis', 'Teneka', 'Teneisha', 'Tarence', 'Taralyn', 'Tamiko', 'Tamie', 'Talmadge', 'Takira', 'Sunil', 'Stefon', 'Sol', 'Solange', 'Smantha', 'Shyanne', 'Shree', 'Shomari', 'Sherrita', 'Shenequa', 'Shaylene', 'Shauntia', 'Shatia', 'Sharlee', 'Shanisha', 'Shadi', 'Serafin', 'Sera', 'Selenia', 'Sejal', 'See', 'Sarahann', 'Sandie', 'Samone', 'Sakinah', 'Sachin', 'Ryley', 'Roya', 'Rowan', 'Roth', 'Roderic', 'Rich', 'Reza', 'Raynor', 'Rashanda', 'Ramie', 'Rainer', 'Poonam', 'Petrina', 'Nona', 'Nohemi', 'Nisa', 'Nika', 'Nickey', 'Newton', 'Naimah', 'Naftali', 'Miller', 'Mercedez', 'Meliza', 'Maxie', 'Maryanna', 'Martrell', 'Marqus', 'Marleen', 'Macie', 'Lynzie', 'Lynnea', 'Lyndee', 'Lory', 'Levy', 'Letia', 'Leighanna', 'Le', 'Leatha', 'Lawson', 'Lashannon', 'Lasha', 'Lanie', 'Lamon', 'Lam', 'Kyndall', 'Kyndal', 'Kymberli', 'Kyli', 'Kyleigh', 'Krissa', 'Kreg', 'Kortnee', 'Kodie', 'Kimball', 'Keysha', 'Keyonia', 'Kenney', 'Kendria', 'Kendel', 'Keir', 'Keelan', 'Keela', 'Kedric', 'Kathrin', 'Katarzyna', 'Karrah', 'Karilyn', 'Kariann', 'Kaneisha', 'Kaitlan', 'Kadee', 'Julieanna', 'Jovana', 'Joshau', 'Josemanuel', 'Jonni', 'Johnmark', 'Jilian', 'Jesslyn', 'Jesi', 'Jeromie', 'Jennings', 'Jenel', 'Jedadiah', 'Javonne', 'Janson', 'Janise', 'Janica', 'Jamella', 'Jamaul', 'Jamaar', 'Isa', 'Ioannis', 'Ikaika', 'Ibn', 'Hortencia', 'Hien', 'Haywood', 'Hayward', 'Glory', 'Gladis', 'Giuliana', 'Gerrit', 'Geena', 'Gamaliel', 'Fantasia', 'Erynn', 'Eron', 'Ermelinda', 'Emanual', 'Eman', 'Elly', 'Elishia', 'Elisheva', 'Eliazar', 'Elda', 'Divya', 'Dimitra', 'Dezirae', 'Dezarae', 'Devonte', 'Derin', 'Deneen', 'Denee', 'Demetruis', 'Delina', 'Deaundra', 'Daylon', 'Dawayne', 'Dawan', 'Daryll', 'Darvin', 'Darrian', 'Damond', 'Cirilo', 'Christ', 'Christapher', 'Christain', 'Cherokee', 'Cherlyn', 'Cherese', 'Chason', 'Charice', 'Cavin', 'Carrisa', 'Carmin', 'Candido', 'Candelario', 'Callan', 'Britanie', 'Bristol', 'Brette', 'Babyboy', 'Aziz', 'Audria', 'Asya', 'Ashliegh', 'Ashante', 'Arya', 'Arden', 'Apolinar', 'Antwane', 'Ambur', 'Alvina', 'Alli', 'Aleksandra', 'Aleena', 'Akiva', 'Aharon', 'Adora', 'Adolph', 'Zavier', 'Zacary', 'Yehudis', 'Yashica', 'Vicent', 'Vianey', 'Vernice', 'Truong', 'Tri', 'Torre', 'Tocarra', 'Tobie', 'Tino', 'Tijuana', 'Terrick', 'Terrelle', 'Teron', 'Tearra', 'Tangie', 'Taliah', 'Sylvana', 'Sydni', 'Suzana', 'Stasia', 'Sonali', 'Smith', 'Silvio', 'Siedah', 'Shundra', 'Shronda', 'Shina', 'Sherra', 'Shenell', 'Shavar', 'Sharlie', 'Shanaya', 'Shamus', 'Shamonica', 'Shakeema', 'Shaheen', 'Sawyer', 'Saran', 'Santonio', 'Sanchez', 'Sammantha', 'Samaria', 'Sakina', 'Sadia', 'Rush', 'Rossana', 'Roshunda', 'Roshelle', 'Rondale', 'Rommel', 'Rollin', 'Rodriguez', 'Rivkah', 'Rigo', 'Renay', 'Renardo', 'Rebbeca', 'Rasha', 'Rajesh', 'Raizel', 'Raffaele', 'Rabia', 'Porschia', 'Porchia', 'Phuc', 'Perri', 'Peri', 'Padraic', 'Osman', 'Oran', 'Omayra', 'Nneka', 'Nirav', 'Nickolus', 'Neville', 'Nevada', 'Nekisha', 'Neill', 'Navid', 'Natividad', 'Natascha', 'Nasir', 'Moria', 'Mi', 'Micole', 'Michaelanthony', 'Meena', 'Mee', 'Maximiliano', 'Marylee', 'Marrio', 'Marquia', 'Markeshia', 'Mariza', 'Malynda', 'Makenna', 'Mable', 'Lynsay', 'Lovell', 'Lou', 'Loran', 'Lonnell', 'Lisset', 'Lisandro', 'Lionell', 'Leslieann', 'Leeroy', 'Lanell', 'Lajuan', 'Ladawn', 'Kiran', 'Kiki', 'Kierstin', 'Kenitra', 'Kelliann', 'Keandra', 'Kaya', 'Kavin', 'Katty', 'Katryna', 'Katrine', 'Katasha', 'Karleen', 'Karima', 'Kahla', 'Kaeli', 'Julene', 'Juaquin', 'Juanjose', 'Jonnathan', 'Joneric', 'Jolee', 'Johsua', 'Johny', 'Jock', 'Jessicia', 'Jerusha', 'Jeniece', 'Jarron', 'Jaquelin', 'Jannah', 'Janella', 'Janalee', 'Jama', 'Isidoro', 'Infant', 'Heber', 'Haven', 'Hardy', 'Hang', 'Gypsy', 'Giannina', 'Georgiana', 'Gennaro', 'Genia', 'Fue', 'Freddrick', 'Farrell', 'Farhan', 'Evaristo', 'Emmanual', 'Emiley', 'Emi', 'Edrick', 'Easton', 'Eamonn', 'Duwayne', 'Dupree', 'Duc', 'Doron', 'Donn', 'Dollie', 'Deyanira', 'Devonne', 'Devonna', 'Dessie', 'Delena', 'Delaina', 'Deitra', 'Deirdra', 'Davonna', 'Davidson', 'Dashiell', 'Darrah', 'Darious', 'Damone', 'Cristan', 'Criag', 'Constantinos', 'Cletus', 'Chyanne', 'Christohper', 'Chong', 'Cherith', 'Charlsie', 'Charlita', 'Chani', 'Cerissa', 'Celestino', 'Catina', 'Catarina', 'Casaundra', 'Carline', 'Carita', 'Candelaria', 'Cammy', 'Camile', 'Caitlynn', 'Butch', 'Brittiney', 'Brittan', 'Brita', 'Brigit', 'Billi', 'Bethanne', 'Batsheva', 'Barrington', 'Azure', 'Athony', 'Ashleen', 'Artie', 'Arion', 'Ariele', 'Aren', 'Anuj', 'Angelyn', 'Andrey', 'Andrews', 'Amparo', 'Amity', 'Alannah', 'Alaine', 'Aiden', 'Adrean', 'Adelle', 'Zeke', 'Zarina', 'Zabrina', 'Yechiel', 'Waymon', 'Venisha', 'Velia', 'Varun', 'Vania', 'Usman', 'Tyronda', 'Tyre', 'Tunisha', 'Tung', 'Tu', 'Towanda', 'Toddrick', 'Tiare', 'Teirra', 'Tedra', 'Teddi', 'Taysha', 'Tamer', 'Takiya', 'Taisa', 'Sy', 'Sven', 'Sultan', 'Stefen', 'Stavros', 'Starlene', 'Stafford', 'Soloman', 'Skyla', 'Sixto', 'Silverio', 'Sidra', 'Shyam', 'Shontell', 'Sholom', 'Shley', 'Shiree', 'Shilpa', 'Shevonne', 'Shenae', 'Shela', 'Shekita', 'Shatavia', 'Sharay', 'Sharayah', 'Shanteria', 'Shakelia', 'Seanmichael', 'Saskia', 'Sanjuana', 'Sandee', 'Samanthia', 'Roshni', 'Rosalio', 'Rony', 'Ronika', 'Roma', 'Richele', 'Renesha', 'Reeva', 'Raymone', 'Rayford', 'Raychelle', 'Rashod', 'Rashidah', 'Rambo', 'Raena', 'Raechelle', 'Queen', 'Priscella', 'Price', 'Pascal', 'Parisa', 'Odalys', 'Nyla', 'Noemy', 'Noell', 'Noelani', 'Noam', 'Nile', 'Nila', 'Nikeya', 'Niels', 'Nels', 'Nelida', 'Nasser', 'Nakeia', 'Mylinda', 'Mostafa', 'Millard', 'Michala', 'Michaelyn', 'Michaelle', 'Merri', 'Memory', 'Melba', 'Mccall', 'Maxfield', 'Marymargaret', 'Marygrace', 'Marlie', 'Markeeta', 'Marilou', 'Marcellous', 'Macey', 'Lynzi', 'Lynwood', 'Lyn', 'Lukus', 'Luanne', 'Lorri', 'Lorien', 'Lonzo', 'Lilah', 'Liesel', 'Letrice', 'Leslye', 'Leonidas', 'Lavonna', 'Lavette', 'Lauretta', 'Larena', 'Laporsha', 'Lanetta', 'Lanee', 'Lakrisha', 'Lacretia', 'Kyron', 'Kylan', 'Kiyana', 'Kaysha', 'Kathern', 'Kashia', 'Kashawn', 'Karlo', 'Kansas', 'Kalon', 'Kaity', 'Kaili', 'Judi', 'Josalyn', 'Jonita', 'Jonetta', 'Jolanda', 'Johannes', 'Joetta', 'Jocelin', 'Jethro', 'Jessic', 'Jermal', 'Jerimy', 'Jerardo', 'Jennier', 'Jenai', 'Jayde', 'Jawan', 'Javoris', 'Jarom', 'Janathan', 'Jamiel', 'Jamecia', 'Jalil', 'Jahmal', 'Jacqui', 'Ieasha', 'Ichael', 'Hipolito', 'Herminia', 'Henderson', 'Heide', 'Hampton', 'Gwyneth', 'Giuseppina', 'Gian', 'Germain', 'Genise', 'Gaspar', 'Garnett', 'Garen', 'Frederica', 'Etta', 'Estee', 'Erron', 'Ericca', 'Ema', 'Elexis', 'Eldridge', 'Edie', 'Ector', 'Duriel', 'Doran', 'Donnetta', 'Domique', 'Dmitri', 'Dex', 'Devron', 'Destany', 'Denia', 'Demetrus', 'De', 'Delroy', 'Deepak', 'Deeann', 'Dava', 'Darold', 'Darcee', 'Cyrena', 'Crispin', 'Cosme', 'Coryn', 'Collen', 'Ciro', 'Cindel', 'Christophr', 'Chesley', 'Chera', 'Chazz', 'Chaundra', 'Chao', 'Carolanne', 'Carlisha', 'Carah', 'Candiss', 'Caitrin', 'Cailyn', 'Brittony', 'Boyce', 'Bethaney', 'Bernadine', 'Benigno', 'Bejamin', 'Bashir', 'Bakari', 'Aundre', 'Augusto', 'Atia', 'Asif', 'Ashlye', 'Armondo', 'Armanda', 'Arlette', 'Antwann', 'Antawn', 'Aniel', 'Angelee', 'Aneesah', 'Analise', 'Analee', 'Amani', 'Alston', 'Alethia', 'Alessia', 'Alejandrina', 'Aleia', 'Aishia', 'Adrina', 'Zak', 'Yury', 'Yomaira', 'Wynton', 'Waldo', 'Vida', 'Vernetta', 'Vang', 'Valine', 'Uyen', 'Tyshon', 'Tyresha', 'Tyrelle', 'Tyneisha', 'Twanda', 'Tremain', 'Trebor', 'Torrell', 'Toria', 'Tonny', 'Timmie', 'Tierre', 'Thong', 'Tenecia', 'Tenaya', 'Telisa', 'Tedrick', 'Tasheka', 'Tarrence', 'Tarrance', 'Tani', 'Tanairi', 'Tamir', 'Talaya', 'Takela', 'Steffon', 'Sonal', 'Sir', 'Shontia', 'Shemekia', 'Shealyn', 'Shatina', 'Sharise', 'Shantina', 'Shanah', 'Shaleena', 'Sarahjane', 'Sapphire', 'Sandro', 'Samar', 'Samanta', 'Ryen', 'Ronesha', 'Romell', 'Roddrick', 'Rock', 'Rhiana', 'Retha', 'Resa', 'Rashel', 'Ranita', 'Rand', 'Ragan', 'Rafe', 'Quintella', 'Prisilla', 'Pinchas', 'Phillips', 'Peaches', 'Pavielle', 'Pao', 'Omega', 'Oliva', 'Niklas', 'Niketa', 'Nesha', 'Nelda', 'Naja', 'Nadja', 'Nadir', 'Mose', 'Montel', 'Montell', 'Monalisa', 'Milagro', 'Mikela', 'Micholas', 'Melani', 'Mei', 'Meaghen', 'Mckay', 'Martinique', 'Marquese', 'Marius', 'Maritsa', 'Marisella', 'Mariella', 'Marica', 'Marbella', 'Malikah', 'Luisana', 'Lucrecia', 'Lucious', 'Lovely', 'Linday', 'Lida', 'Lessie', 'Leshawn', 'Lekeshia', 'Lekesha', 'Leatrice', 'Layna', 'Lavita', 'Lavern', 'Laurissa', 'Laure', 'Latrell', 'Latiesha', 'Larnell', 'Larisha', 'Lareina', 'Lameka', 'Kyna', 'Krystol', 'Krystall', 'Krizia', 'Kristyl', 'Kristene', 'Krishna', 'Kizzy', 'Kirbie', 'Khrystal', 'Khara', 'Keneshia', 'Keldrick', 'Karson', 'Karolina', 'Kapri', 'Kandie', 'Kanani', 'Kael', 'Justan', 'Jovanni', 'Joie', 'Johnrobert', 'Johnette', 'Jesscia', 'Jerrie', 'Jermie', 'Jeremias', 'Jennyfer', 'Jenne', 'Jemar', 'Jeanpierre', 'Jeanene', 'Jawann', 'Jarin', 'Jani', 'Jamilyn', 'Jamela', 'Jamahl', 'Jalene', 'Jalal', 'Jahmar', 'Jacilyn', 'Ismail', 'Ilan', 'Huyen', 'Hillel', 'Hilarie', 'Hanif', 'Halston', 'Hala', 'Gustav', 'Guido', 'Gregroy', 'Giana', 'Gerrad', 'Georges', 'Genelle', 'Fredericka', 'Flint', 'Filip', 'Evangelos', 'Eulalio', 'Ericia', 'Enos', 'Emalee', 'Elysa', 'Elyce', 'Elwood', 'Elinor', 'Elina', 'Eldra', 'Dorsey', 'Doria', 'Donika', 'Domonick', 'Dominik', 'Dj', 'Divine', 'Dijon', 'Devone', 'Deneshia', 'Denelle', 'Delon', 'Dejah', 'December', 'Dawnelle', 'Danitra', 'Danessa', 'Dalen', 'Corbett', 'Connell', 'Clancy', 'Cinda', 'Chritopher', 'Chiffon', 'Chevelle', 'Charlisa', 'Celestine', 'Ceaira', 'Catheryn', 'Casper', 'Carine', 'Callista', 'Calley', 'Buster', 'Brittania', 'Britne', 'Brendalee', 'Breena', 'Breeana', 'Brandye', 'Bonni', 'Beulah', 'Betina', 'Bertram', 'Belynda', 'Barclay', 'Babak', 'Avinash', 'Atif', 'Ashraf', 'Ashby', 'Arminda', 'Arlena', 'Arie', 'Ariela', 'Arcadio', 'Aracelis', 'Antonios', 'Antoin', 'Anjanette', 'Ania', 'Angelene', 'Anette', 'Andrell', 'Anaalicia', 'Aloysius', 'Alonda', 'Alene', 'Aleksander', 'Akash', 'Aisling', 'Aime', 'Aftan', 'Aditi', 'Adil', 'Zebulun', 'Zaneta', 'Yuridia', 'Yee', 'Yahira', 'Willia', 'Whitni', 'Whisper', 'Vikas', 'Vienna', 'Victoriano', 'Venecia', 'Vann', 'Val', 'Valeen', 'Tzipora', 'Tysha', 'Twana', 'Tristyn', 'Trenise', 'Tramell', 'Toshiba', 'Tonette', 'Tikia', 'Tesia', 'Teria', 'Teonna', 'Tashay', 'Taria', 'Taquana', 'Taniqua', 'Tamicka', 'Talea', 'Takita', 'Sydnee', 'Starsha', 'Starlet', 'Sina', 'Shifra', 'Shianne', 'Sherwood', 'Sherree', 'Sheresa', 'Shekia', 'Sheina', 'Shaylee', 'Shawndra', 'Sharece', 'Shamyra', 'Shalisa', 'Shalimar', 'Shakena', 'Shakeia', 'Shacara', 'Shaan', 'Seferino', 'Rylee', 'Ruston', 'Rowland', 'Roshawnda', 'Roshan', 'Roneisha', 'Ronak', 'Robbyn', 'Ric', 'Reuven', 'Reno', 'Raudel', 'Rashawnda', 'Ranisha', 'Ranesha', 'Raine', 'Rahcel', 'Quanesha', 'Presley', 'Otoniel', 'Ona', 'Omero', 'Nikie', 'Nicholos', 'Ngoc', 'Neysa', 'Nekita', 'Neesha', 'Natia', 'Naomie', 'Nakiya', 'Naeem', 'Nachelle', 'Myla', 'Monic', 'Moishe', 'Mignon', 'Michaele', 'Miceala', 'Meri', 'Melton', 'Meliss', 'Megin', 'Megha', 'Meara', 'Mayte', 'Mayela', 'Maverick', 'Matilde', 'Maryrose', 'Marycatherine', 'Martia', 'Marrisa', 'Marline', 'Markis', 'Markese', 'Margery', 'Margarette', 'Maquita', 'Makita', 'Maddie', 'Maceo', 'Lysette', 'Lynzee', 'Ly', 'Loreen', 'Loralee', 'Lluvia', 'Llewellyn', 'Livia', 'Linzie', 'Librado', 'Leta', 'Leola', 'Lennon', 'Lenise', 'Leea', 'Lathan', 'Lateef', 'Lashonna', 'Lasheka', 'Lasaundra', 'Laroy', 'Larenzo', 'Larenda', 'Lanna', 'Langston', 'Laneshia', 'Lakresha', 'Lakesia', 'Lakea', 'Ladon', 'Kyrstal', 'Kyley', 'Kyana', 'Kristeena', 'Kortnie', 'Kolin', 'Kiva', 'Kimiko', 'Kimesha', 'Khristian', 'Keya', 'Kennesha', 'Kendrell', 'Kelisha', 'Keiana', 'Kea', 'Kaysie', 'Kayse', 'Kaylon', 'Katreena', 'Katheryne', 'Katelan', 'Kasee', 'Karsten', 'Kamila', 'Kamala', 'Juvenal', 'Jovonna', 'Joslynn', 'Jorell', 'Jonatan', 'Joell', 'Jocob', 'Joao', 'Jerrard', 'Jere', 'Jennel', 'Jeneva', 'Jeneen', 'Jenafer', 'Jefrey', 'Jedd', 'Javis', 'Janira', 'Jamilee', 'Jamael', 'Jalyn', 'Jahmel', 'Jaeson', 'Jacqualyn', 'Irena', 'Ilona', 'Ila', 'Hyrum', 'Hollee', 'Hendrick', 'Heith', 'Hayes', 'Harriett', 'Hanson', 'Grey', 'Gisell', 'Giovanny', 'Ginette', 'Gerrard', 'Georgianna', 'Geoffry', 'Geary', 'Garon', 'Frisco', 'Freida', 'Fredricka', 'Francina', 'Ford', 'Flynn', 'Fitzgerald', 'Fahad', 'Evon', 'Evelynn', 'Evangelia', 'Eureka', 'Erendira', 'Epifanio', 'English', 'Elsy', 'Elin', 'Easter', 'Dwane', 'Duan', 'Donnisha', 'Diondre', 'Diante', 'Diann', 'Deziree', 'Deysi', 'Dewan', 'Devi', 'Destinie', 'Destine', 'Deshawna', 'Denzel', 'Demarkus', 'Demarius', 'Delfino', 'Dawnielle', 'Davide', 'Dashon', 'Darrien', 'Darnel', 'Darcell', 'Dannelle', 'Danah', 'Dallen', 'Daisey', 'Daena', 'Curry', 'Curran', 'Crystalynn', 'Corri', 'Corinthian', 'Coree', 'Conan', 'Cleve', 'Cleopatra', 'Cindia', 'Christia', 'Chetan', 'Chere', 'Chastidy', 'Charon', 'Charnell', 'Chantz', 'Chanie', 'Champagne', 'Cendy', 'Cassius', 'Casimiro', 'Carleigh', 'Canaan', 'Calla', 'Cachet', 'Brooklynn', 'Brittne', 'Britten', 'Brigett', 'Brienna', 'Breonna', 'Bonifacio', 'Bj', 'Bianka', 'Bettie', 'Betsey', 'Bernabe', 'Becca', 'Barak', 'Bailee', 'Awilda', 'Aurea', 'Aundra', 'Argenis', 'Argelia', 'Aquilla', 'Apolonio', 'Apolonia', 'Andrei', 'Anastacio', 'Amey', 'Amberlynn', 'Alon', 'Allissa', 'Alen', 'Alek', 'Adrion', 'Adnan', 'Adelita', 'Aaren', 'Zulay', 'Zenia', 'Zackory', 'Yanet', 'Yamilet', 'Winifred', 'Wilhelm', 'Watson', 'Vuong', 'Vincenza', 'Uri', 'Tyronne', 'Tylisha', 'Tyann', 'Trudi', 'Traves', 'Tomasa', 'Tirrell', 'Timonthy', 'Tiandra', 'Tiah', 'Thaddius', 'Teya', 'Terryn', 'Terren', 'Telicia', 'Teandra', 'Tari', 'Tanasha', 'Tameshia', 'Tamarcus', 'Tait', 'Tahirah', 'Sylvie', 'Sutton', 'Sunita', 'Stephaie', 'Sissy', 'Silvana', 'Sigifredo', 'Shelena', 'Shayleen', 'Shawon', 'Shaughn', 'Sharlyn', 'Sharilyn', 'Shaneil', 'Shandrea', 'Shanan', 'Shamir', 'Shameek', 'Shalom', 'Shalisha', 'Shakirah', 'Shaela', 'Savina', 'Sarkis', 'San', 'Samirah', 'Sakeena', 'Safiyyah', 'Rudi', 'Rori', 'Ronell', 'Robet', 'Ricahrd', 'Rhianon', 'Reshma', 'Renzo', 'Rema', 'Rayshaun', 'Rashaan', 'Raoul', 'Ramin', 'Rakia', 'Rakesh', 'Rajan', 'Raguel', 'Prescilla', 'Porshe', 'Penina', 'Pearce', 'Paulmichael', 'Pamella', 'Otha', 'Ola', 'Obinna', 'Nilsa', 'Nikkita', 'Nicollette', 'Nichele', 'Nhung', 'Natoshia', 'Narada', 'Nadiyah', 'Nadeem', 'Myria', 'Morgana', 'Monigue', 'Monette', 'Milinda', 'Mikell', 'Mickel', 'Michae', 'Michaeljohn', 'Menno', 'Melodi', 'Meganne', 'Mega', 'Mcarthur', 'Maurio', 'Mathhew', 'Maryalice', 'Marquice', 'Marli', 'Maricel', 'Maresa', 'Malky', 'Malanie', 'Makisha', 'Maisie', 'Maher', 'Madelaine', 'Lyndie', 'Lita', 'Lindee', 'Lex', 'Leondra', 'Leela', 'Leeah', 'Lavoris', 'Latrecia', 'Latifa', 'Lashante', 'Laressa', 'Landry', 'Lamesha', 'Lainey', 'Ladana', 'Kylah', 'Krystl', 'Krystan', 'Kristol', 'Kristain', 'Korri', 'Kohl', 'Klinton', 'Klara', 'Kionna', 'Kinsley', 'Kimberlyann', 'Kiah', 'Khary', 'Khanh', 'Keone', 'Kenyana', 'Kenta', 'Kennth', 'Kenderick', 'Kelcy', 'Kejuan', 'Keidra', 'Keera', 'Keeli', 'Keasha', 'Kaylah', 'Kavon', 'Katti', 'Katherina', 'Kassia', 'Kason', 'Karol', 'Karma', 'Kareen', 'Kaneshia', 'Kameshia', 'Kaia', 'Joseh', 'Jonisha', 'Jondavid', 'Jin', 'Jimi', 'Jhon', 'Jessyka', 'Jermichael', 'Jeremia', 'Jennfier', 'Jenay', 'Jeena', 'Jeane', 'Jayvon', 'Jayda', 'Jawaun', 'Javonna', 'Jarek', 'Jannett', 'Janiel', 'Jania', 'Jahaziel', 'Jadira', 'Jacquelynne', 'Jacquelina', 'Ivania', 'Irish', 'Irfan', 'Indra', 'Ilda', 'Holden', 'Gregery', 'Glynnis', 'Gisele', 'Ginelle', 'Gila', 'Ger', 'Genoveva', 'Genevie', 'Gardner', 'Gao', 'Farren', 'Fareed', 'Falen', 'Evert', 'Eugena', 'Estephanie', 'Erek', 'Enmanuel', 'Ena', 'Emili', 'Eliott', 'Elimelech', 'Elecia', 'Edric', 'Earlene', 'Earle', 'Dietrich', 'Diem', 'Diangelo', 'Deserie', 'Deseray', 'Deryk', 'Derris', 'Derrin', 'Derrel', 'Dennison', 'Dell', 'Declan', 'Decarlo', 'Debrah', 'Deandria', 'Deandrae', 'Daunte', 'Darnesha', 'Darick', 'Dany', 'Danea', 'Crytal', 'Crystall', 'Corianne', 'Corban', 'Coley', 'Cleon', 'Clarrissa', 'Claressa', 'Chue', 'Chivon', 'Cherrell', 'Chantale', 'Chanse', 'Chanita', 'Chanika', 'Chancellor', 'Chakita', 'Casimir', 'Carry', 'Burt', 'Bucky', 'Brieana', 'Bridgit', 'Brentley', 'Breezy', 'Branton', 'Bradi', 'Bradd', 'Bobi', 'Bernita', 'Benjaman', 'Baxter', 'Basilio', 'Barrie', 'Aya', 'Audrina', 'Atara', 'Ashleymarie', 'Ashlen', 'Ashford', 'Art', 'Artisha', 'Arti', 'Arnell', 'Armin', 'Antwanette', 'Andrian', 'Andrez', 'Andrena', 'Amon', 'Amesha', 'Amer', 'Amberley', 'Amando', 'Amand', 'Allyse', 'Allyce', 'Allisyn', 'Aleem', 'Alaric', 'Akeen', 'Agustina', 'Aften', 'Adel', 'Adelaida', 'Abril', 'Aamir', 'Zinnia', 'Zeth', 'Zenon', 'Zarah', 'Zain', 'Yonah', 'Yoko', 'Xuan', 'Xaviera', 'Wilhelmina', 'Wilburn', 'Wendel', 'Wellington', 'Walt', 'Walid', 'Wacey', 'Virgie', 'Vickey', 'Veasna', 'Vanesha', 'Vaishali', 'Uvaldo', 'Urbano', 'Tylar', 'Tykia', 'Twanna', 'Tunisia', 'Tressie', 'Tremell', 'Travanti', 'Toriano', 'Tobey', 'Timon', 'Thy', 'Thorin', 'Thoams', 'Theotis', 'Thayne', 'Thang', 'Tevita', 'Terris', 'Tawney', 'Tashonda', 'Tarika', 'Taraneh', 'Taner', 'Tanecia', 'Tanae', 'Tammera', 'Tamikia', 'Talicia', 'Takelia', 'Takeia', 'Tacy', 'Sylvan', 'Suzann', 'Sundeep', 'Sunday', 'Stephanieann', 'Spiro', 'Special', 'Silvester', 'Sherod', 'Sherard', 'Shenelle', 'Sheilah', 'Sheera', 'Sharonica', 'Shaqueena', 'Shantea', 'Shanitra', 'Shanicka', 'Shandrika', 'Shandon', 'Shandell', 'Shamieka', 'Shaley', 'Shakeria', 'Shakeita', 'Shahin', 'Shaheed', 'Sequita', 'Sendy', 'Satin', 'Saray', 'Saralyn', 'Santo', 'Sameerah', 'Salome', 'Salman', 'Sahra', 'Sabino', 'Ruthanne', 'Roshawn', 'Ronita', 'Romelia', 'Rodricus', 'Rito', 'Rheannon', 'Reyn', 'Rexford', 'Renada', 'Rayann', 'Rayan', 'Rashun', 'Rashaunda', 'Rashan', 'Ramy', 'Ralpheal', 'Raegan', 'Quintez', 'Quinisha', 'Prescott', 'Prentis', 'Prashant', 'Placido', 'Phebe', 'Pebbles', 'Pavan', 'Oneida', 'Olive', 'Ogechi', 'Obie', 'Obert', 'Oanh', 'Nyree', 'Nyoka', 'Nyeisha', 'Nikol', 'Nikiya', 'Nija', 'Nieves', 'Nicoletta', 'Nicholl', 'Nichalos', 'Nathaneal', 'Natanael', 'Nastasia', 'Nasha', 'Nannette', 'Nallely', 'Najla', 'Naila', 'Muhammed', 'Morgann', 'Mirta', 'Milly', 'Milford', 'Mikia', 'Michon', 'Michaelia', 'Meriah', 'Mendi', 'Mendel', 'Melva', 'Melita', 'Melissaann', 'Meighan', 'Meggin', 'Meegan', 'Maygen', 'Maxx', 'Matalie', 'Marlayna', 'Markos', 'Markee', 'Markeda', 'Maris', 'Marily', 'Marguis', 'Margit', 'Maresha', 'Mareo', 'Mao', 'Magdalen', 'Ma', 'Madelin', 'Lysa', 'Lynnae', 'Lynde', 'Lue', 'Lucerito', 'Lubna', 'Loria', 'Lonna', 'Londa', 'Linnette', 'Leonna', 'Lennard', 'Laurent', 'Laural', 'Latoia', 'Latiffany', 'Lateesha', 'Lashun', 'Lashauna', 'Lashara', 'Laresha', 'Laportia', 'Lanessa', 'Lambert', 'Lamark', 'Lake', 'Lakedra', 'Lagina', 'Kymberlee', 'Kule', 'Koda', 'Klint', 'Kimo', 'Kimerly', 'Kimbra', 'Keziah', 'Kerrianne', 'Kerie', 'Kerby', 'Kenley', 'Kenita', 'Kemberly', 'Keianna', 'Keandre', 'Keaira', 'Kayte', 'Kawanna', 'Katrisha', 'Kateland', 'Kasim', 'Karisha', 'Kao', 'Kana', 'Kalene', 'Kaira', 'Kaelin', 'Kacia', 'Junius', 'Judge', 'Jr', 'Joycelynn', 'Jontae', 'Jonahtan', 'Johnaton', 'Joby', 'Jilliann', 'Jillianne', 'Jhonny', 'Jeshua', 'Jeromey', 'Jermon', 'Jerman', 'Jerilynn', 'Jenniefer', 'Jenney', 'Jenevieve', 'Jeanice', 'Jazlyn', 'Jaycee', 'Javonda', 'Jassica', 'Jasmeen', 'Jarius', 'Jammal', 'Jamielynn', 'Jamari', 'Jadie', 'Issa', 'Isacc', 'Hussain', 'Huey', 'Homar', 'Hisham', 'Hester', 'Herminio', 'Harrell', 'Hannibal', 'Hanan', 'Hamza', 'Hagop', 'Guinevere', 'Griffith', 'Golden', 'Glynn', 'Giulia', 'Ginna', 'Gildardo', 'Gertrude', 'Gershon', 'Gerrell', 'Geovanny', 'Geoff', 'Gennie', 'Genell', 'Gannon', 'Gabe', 'Freya', 'Freedom', 'Filomena', 'Fielding', 'Felicitas', 'Favio', 'Eulalia', 'Errica', 'Erienne', 'Ericha', 'Eran', 'Enoc', 'Ennifer', 'Eneida', 'Elysse', 'Elnora', 'Elizbeth', 'Eliud', 'Eliabeth', 'Elden', 'Elayna', 'Eitan', 'Edsel', 'Earnestine', 'Dvid', 'Dustie', 'Domnique', 'Dominie', 'Desaree', 'Deondria', 'Deona', 'Denishia', 'Denea', 'Demorris', 'Delta', 'Delma', 'Deepa', 'Dawon', 'Davone', 'Davia', 'Davette', 'Darvis', 'Darryle', 'Daris', 'Darik', 'Daric', 'Darice', 'Danetta', 'Danee', 'Damika', 'Dagan', 'Cristofer', 'Cortnee', 'Cortland', 'Corinn', 'Colbie', 'Chrystie', 'Christobal', 'Chrissie', 'Chia', 'Charolette', 'Charese', 'Charell', 'Chandni', 'Chanae', 'Chaddrick', 'Celene', 'Ceira', 'Cederick', 'Carrieann', 'Carnisha', 'Carmon', 'Camilia', 'Camela', 'Camara', 'Caine', 'Britain', 'Brinton', 'Bren', 'Blima', 'Bevan', 'Bertrand', 'Baylee', 'Banjamin', 'Azalea', 'Avalon', 'Aubre', 'Arthuro', 'Arlin', 'Arline', 'Aprille', 'Appolonia', 'Antonyo', 'Antoni', 'Antoinne', 'Ankit', 'Anish', 'Anica', 'Angelicia', 'Anabell', 'Anabelle', 'Amye', 'Amia', 'Americo', 'Alvis', 'Alistair', 'Alicen', 'Alesandra', 'Alesa', 'Aleigha', 'Albino', 'Alastair', 'Akram', 'Akita', 'Akila', 'Akeya', 'Aeriel', 'Adrena', 'Adelia', 'Abigayle', 'Zully', 'Zelda', 'Zeb', 'Zakee', 'Zac', 'Yoshio', 'Yonathan', 'Yentl', 'Yeng', 'Yechezkel', 'Yashira', 'Yaminah', 'Xylina', 'Xavion', 'Wyman', 'Wlliam', 'Winford', 'Waleska', 'Velda', 'Vanita', 'Vanisha', 'Valisha', 'Tysheena', 'Tyrrell', 'Tyreek', 'Tynika', 'Tuyet', 'Trenna', 'Treavor', 'Travell', 'Travaris', 'Tram', 'Toyia', 'Tonda', 'Tomasz', 'Tomasina', 'Tiphanie', 'Tillie', 'Theophilus', 'Theodoros', 'Thais', 'Tessica', 'Teshia', 'Terryl', 'Terrika', 'Terrace', 'Tereza', 'Tereasa', 'Tazia', 'Tauni', 'Tashima', 'Tashea', 'Tarrin', 'Tareva', 'Taquita', 'Taquisha', 'Tannia', 'Tanesia', 'Tandy', 'Tandrea', 'Tamitha', 'Tama', 'Tal', 'Taleah', 'Tajuana', 'Taja', 'Taiesha', 'Tahira', 'Tabbetha', 'Sweta', 'Susy', 'Susann', 'Stephanee', 'Spiros', 'Sopheak', 'Sonnie', 'Sona', 'Skip', 'Sivan', 'Shunte', 'Shun', 'Shevon', 'Sherrice', 'Sheronica', 'Sheron', 'Shereena', 'Shemia', 'Shellee', 'Shaylynn', 'Shawntell', 'Shavonn', 'Shaune', 'Sharyl', 'Sharnell', 'Shaquila', 'Shantrice', 'Shantana', 'Shanina', 'Shanekia', 'Shaneice', 'Shama', 'Shakila', 'Shakeeta', 'Shakea', 'Shainna', 'Shaday', 'Sebastien', 'Sariah', 'Sarha', 'Said', 'Safia', 'Rubina', 'Rozlyn', 'Roxy', 'Rosy', 'Roshaun', 'Rosella', 'Rodriques', 'Roddy', 'Rockey', 'Roby', 'Robertson', 'Rica', 'Remus', 'Rahsaan', 'Quran', 'Quinetta', 'Quince', 'Quana', 'Phi', 'Peterson', 'Petar', 'Pearson', 'Patrik', 'Parnell', 'Parish', 'Panagiota', 'Ovidio', 'Novella', 'Nou', 'Nolen', 'Ninfa', 'Nikos', 'Niko', 'Niel', 'Nichola', 'Nathanel', 'Natausha', 'Natanya', 'Nana', 'Nakiesha', 'Nadege', 'Mykia', 'Montavious', 'Monta', 'Mirel', 'Minda', 'Mikka', 'Micheline', 'Michelina', 'Micael', 'Melodee', 'Melea', 'Mavis', 'Maury', 'Master', 'Maryhelen', 'Markeya', 'Marja', 'Mariesa', 'Mariadejesus', 'Marena', 'Marek', 'Maleah', 'Malea', 'Mala', 'Makesha', 'Mahdi', 'Magon', 'Magdaleno', 'Lynetta', 'Lyna', 'Luana', 'Love', 'Lizandro', 'Lizandra', 'Little', 'Lissett', 'Lise', 'Levin', 'Letoya', 'Leslieanne', 'Leeza', 'Leandrew', 'Lawana', 'Lavra', 'Laurene', 'Laurabeth', 'Latrenda', 'Latoiya', 'Latise', 'Latifah', 'Latice', 'Laryssa', 'Laruen', 'Larua', 'Larrisa', 'Larkin', 'Larinda', 'Laquinda', 'Lanora', 'Lanika', 'Lamika', 'Lalita', 'Lakira', 'Lakevia', 'Lakasha', 'Laiza', 'Lafonda', 'Lacole', 'Kyanna', 'Krystopher', 'Kriste', 'Kisa', 'Kindall', 'Kimi', 'Kimbery', 'Keyna', 'Kevina', 'Kesia', 'Kerline', 'Kenard', 'Kellyanne', 'Kelleigh', 'Keleigh', 'Kekoa', 'Keion', 'Keiona', 'Keefe', 'Kaytlin', 'Kaveh', 'Kathren', 'Kasaundra', 'Karimah', 'Karel', 'Kammi', 'Kalem', 'Kaisa', 'July', 'Juanito', 'Joselito', 'Jordin', 'Jonee', 'Jolena', 'Johnita', 'Joette', 'Joclyn', 'Jinger', 'Jheri', 'Jeston', 'Jesselyn', 'Jese', 'Jerret', 'Jerimie', 'Jericho', 'Jerett', 'Jeremaine', 'Jennilyn', 'Jehan', 'Jeffrie', 'Jaye', 'Jawad', 'Jaun', 'Jatoya', 'Jasson', 'Jaslyn', 'Japheth', 'Janeese', 'Jamond', 'Jamille', 'Jamesmichael', 'Jamekia', 'Jamara', 'Jamale', 'Jaleel', 'Jacory', 'Jaclynne', 'Jaclene', 'Jacleen', 'Imari', 'Hindy', 'Hilliary', 'Higinio', 'Hiedi', 'Hether', 'Heavenly', 'Hart', 'Harper', 'Hari', 'Hansen', 'Hani', 'Hanah', 'Hamid', 'Gretta', 'Grabiel', 'Gittel', 'Gillermo', 'Gianina', 'Giacomo', 'Gerrick', 'Franciso', 'Fonda', 'Fern', 'Fara', 'Fallyn', 'Fabien', 'Fabiana', 'Evelio', 'Evander', 'Eun', 'Etosha', 'Esteven', 'Eryka', 'Enrigue', 'Emmeline', 'Emmauel', 'Elya', 'Elizabethann', 'Eleanore', 'Eleana', 'Early', 'Dylon', 'Dwyane', 'Durelle', 'Dory', 'Doretha', 'Donyelle', 'Donnamarie', 'Dong', 'Donavin', 'Donal', 'Dimitrius', 'Dick', 'Deva', 'Destry', 'Deshun', 'Derricka', 'Derren', 'Derk', 'Derica', 'Deontay', 'Deniz', 'Dene', 'Demetre', 'Dedric', 'Debroah', 'Dea', 'Dawanna', 'Darrow', 'Daneisha', 'Dandra', 'Dalvin', 'Dalisa', 'Dalena', 'Dalana', 'Daine', 'Cydni', 'Cuyler', 'Curtisha', 'Crysten', 'Courtny', 'Cornel', 'Corian', 'Clive', 'Classie', 'Clarinda', 'Cintia', 'Christophor', 'Christoph', 'Chirstina', 'Cherron', 'Cheron', 'Cherly', 'Chelcie', 'Chantele', 'Chantee', 'Chandi', 'Cesario', 'Celisse', 'Cavan', 'Casy', 'Cassady', 'Carlyle', 'Cannon', 'Caleigh', 'Calder', 'Cailey', 'Cadie', 'Brocha', 'Brittay', 'Briton', 'Britini', 'Britaney', 'Britainy', 'Bridger', 'Brettney', 'Breton', 'Brayan', 'Brandn', 'Bladimir', 'Blade', 'Bennet', 'Beata', 'Baila', 'Avital', 'Athina', 'Athan', 'Ashleah', 'Ascencion', 'Artesia', 'Arnita', 'Armon', 'Armida', 'Arlie', 'Arletta', 'Arial', 'Antwine', 'Antoino', 'Antiono', 'Antionio', 'Annia', 'Anneke', 'Annalicia', 'Angeles', 'Aneesha', 'Aneesa', 'Andrw', 'Andrina', 'Andreina', 'Andreika', 'Anahi', 'Ammar', 'Amilia', 'Amilcar', 'Amiel', 'Amenda', 'Amena', 'Ameerah', 'Amberlyn', 'Amarilys', 'Altagracia', 'Almadelia', 'Ally', 'Alixandra', 'Alita', 'Alicyn', 'Alford', 'Alegandro', 'Aldon', 'Alane', 'Akeisha', 'Aishah', 'Ahley', 'Adreana', 'Abbas', 'Zoua', 'Zarinah', 'Zackry', 'Zacchaeus', 'Yul', 'Yoshiko', 'Yasmina', 'Yashika', 'Yan', 'Yaniv', 'Yana', 'Willam', 'Werner', 'Wayman', 'Wayde', 'Vita', 'Violetta', 'Veroncia', 'Venson', 'Venancio', 'Valen', 'Ulisses', 'Tywana', 'Tyriek', 'Tyrece', 'Tynan', 'Tylan', 'Tyeesha', 'Tyeasha', 'Tya', 'Travers', 'Tramel', 'Tong', 'Tomy', 'Tocara', 'Timithy', 'Tikisha', 'Thi', 'Terresa', 'Terral', 'Tereka', 'Telly', 'Tedd', 'Tavarius', 'Taunya', 'Tashawn', 'Tarynn', 'Taquilla', 'Tanessa', 'Taiwan', 'Tabithia', 'Sydnie', 'Swati', 'Storm', 'Steward', 'Sophy', 'Siomara', 'Sintia', 'Sinead', 'Shyann', 'Shoshannah', 'Shirlene', 'Shimeka', 'Sherrica', 'Sherrelle', 'Shermaine', 'Sherine', 'Sherea', 'Shenise', 'Shenia', 'Shean', 'Shazia', 'Shaynna', 'Shaylin', 'Shaya', 'Shavanna', 'Shauntell', 'Shatora', 'Sharrod', 'Sharri', 'Sharea', 'Shaquala', 'Shamon', 'Shameca', 'Shallon', 'Shalandra', 'Shalamar', 'Shaketta', 'Shakeisha', 'Shakeela', 'Shaindy', 'Shahid', 'Shahara', 'Shadrick', 'Seng', 'Saulo', 'Satoya', 'Sarahi', 'Sameul', 'Samanthajo', 'Samad', 'Sadaf', 'Sabre', 'Sable', 'Ry', 'Rut', 'Roshell', 'Rosaline', 'Romaine', 'Rivky', 'Riane', 'Rekeisha', 'Reannon', 'Reana', 'Rayshun', 'Raynell', 'Rayne', 'Rayanne', 'Raya', 'Rashunda', 'Ranee', 'Raisa', 'Rahmel', 'Rahiem', 'Radhika', 'Quinlan', 'Prudence', 'Piotr', 'Philipp', 'Philippa', 'Perrin', 'Osualdo', 'Osha', 'Orlanda', 'Oracio', 'Oneil', 'Omid', 'Odis', 'Nuvia', 'Norvell', 'Noland', 'Noella', 'Nitasha', 'Niraj', 'Nikea', 'Nicloe', 'Nery', 'Neomi', 'Nekeisha', 'Neale', 'Navin', 'Naveen', 'Natlie', 'Natesha', 'Natavia', 'Natarsha', 'Natale', 'Nasreen', 'Nashira', 'Nary', 'Nalani', 'Naida', 'Nahum', 'Naeemah', 'Nadim', 'Munir', 'Monchel', 'Monae', 'Moise', 'Misa', 'Michaelangelo', 'Micaella', 'Meyer', 'Mellanie', 'Melena', 'Melaney', 'Meggen', 'Meesha', 'Matthieu', 'Matther', 'Marylin', 'Marwa', 'Marvina', 'Marvel', 'Marry', 'Marqueta', 'Marlea', 'Marisabel', 'Maricruz', 'Marialuisa', 'Marcin', 'Marceline', 'Marah', 'Manish', 'Makala', 'Majid', 'Maire', 'Maigan', 'Maida', 'Mahala', 'Maghen', 'Lyndsee', 'Lyndia', 'Lydon', 'Ludivina', 'Lovie', 'Lovette', 'Lorretta', 'Lord', 'Lissete', 'Lisett', 'Linna', 'Lindsee', 'Lexy', 'Letesha', 'Lesha', 'Lerin', 'Lequita', 'Leoncio', 'Lenita', 'Lenee', 'Lekia', 'Leiah', 'Lawton', 'Lavonte', 'Lavetta', 'Lavaris', 'Laurinda', 'Laurice', 'Latroya', 'Latresha', 'Latrelle', 'Latrease', 'Latisa', 'Lataisha', 'Lashonta', 'Laranda', 'Laquinton', 'Laquanna', 'Lanise', 'Laketha', 'Lakendria', 'Lakeita', 'Lakeeta', 'Lady', 'Ladarrius', 'Lacrystal', 'Kyria', 'Kristien', 'Kristalyn', 'Krisandra', 'Korrin', 'Konstantina', 'Klaus', 'Klarissa', 'Kirstyn', 'Kirsti', 'Kirbi', 'Kimbely', 'Kilee', 'Kiira', 'Kian', 'Khaliah', 'Kevyn', 'Kerilyn', 'Kenzi', 'Kenon', 'Kennan', 'Kendrea', 'Kemper', 'Kellin', 'Kelleen', 'Keilah', 'Kegan', 'Keenon', 'Keary', 'Keagan', 'Kawan', 'Katye', 'Katrinia', 'Katieann', 'Kateria', 'Kashena', 'Karessa', 'Kandas', 'Kammie', 'Kamber', 'Kamau', 'Kalinda', 'Jun', 'Juluis', 'Jujuan', 'Juanantonio', 'Jozette', 'Joye', 'Jonette', 'Johnisha', 'Joelene', 'Joane', 'Jinna', 'Ji', 'Jetta', 'Jessicah', 'Jerami', 'Jerame', 'Jennifier', 'Jenia', 'Jenah', 'Jehu', 'Jeanell', 'Jazma', 'Javin', 'Javar', 'Jannell', 'Janaye', 'Jammi', 'Jamerson', 'Jameika', 'Jamarl', 'Jalynn', 'Jaelyn', 'Jacquie', 'Jacorey', 'Jackqueline', 'Ileen', 'Ikeem', 'Husain', 'Hollye', 'Hoda', 'Hinda', 'Hillarie', 'Hiliary', 'Heston', 'Hernando', 'Hermes', 'Henna', 'Hellen', 'Heba', 'Harland', 'Gretel', 'Grayling', 'Gigi', 'Gidget', 'Gibson', 'Gibran', 'Gessica', 'Germany', 'Georgie', 'Gaelan', 'Florian', 'Flannery', 'Filipe', 'Faiza', 'Fadi', 'Eugina', 'Erskine', 'Erickson', 'Emmet', 'Elmo', 'Ellice', 'Eliel', 'Edlyn', 'Eddrick', 'Dynasty', 'Dwaun', 'Dorthea', 'Dorrell', 'Donzell', 'Donovon', 'Donnette', 'Donivan', 'Donesha', 'Domingue', 'Diontae', 'Dinora', 'Dierdre', 'Diandre', 'Desha', 'Derrian', 'Derika', 'Denitra', 'Denese', 'Demonica', 'Demone', 'Demitri', 'Demeka', 'Delray', 'Deatrice', 'Davi', 'Dat', 'Dashawna', 'Darrious', 'Darran', 'Danta', 'Dannon', 'Danh', 'Daneen', 'Dai', 'Cyntia', 'Cristela', 'Cornelious', 'Coralee', 'Constantino', 'Columbus', 'Clem', 'Clarrisa', 'Clarisse', 'Ciana', 'Christeen', 'Chrissa', 'Chistina', 'Chioma', 'Cheston', 'Chenise', 'Chauntel', 'Charmane', 'Charletta', 'Charisa', 'Charda', 'Chadric', 'Chadley', 'Cesilia', 'Celinda', 'Cederic', 'Cecila', 'Catherina', 'Cartez', 'Carmilla', 'Carma', 'Caralyn', 'Candas', 'Calvina', 'Calisha', 'Calan', 'Calais', 'Caila', 'Burl', 'Buffy', 'Brycen', 'Brit', 'Brionne', 'Brinson', 'Brighid', 'Breland', 'Branigan', 'Brandii', 'Bodie', 'Beverley', 'Bette', 'Beckie', 'Babatunde', 'Azalia', 'Avid', 'Averi', 'Austyn', 'Aundria', 'Augustina', 'Auburn', 'Atavia', 'Astin', 'Arnetta', 'Arlis', 'Arelys', 'Archana', 'Aqueelah', 'Antoniette', 'Anthea', 'Anntoinette', 'Anise', 'Angila', 'Andreanna', 'Anastasios', 'Anas', 'Ammy', 'Amisha', 'Ames', 'Ambyr', 'Amaury', 'Alphonzo', 'Alok', 'Alnisa', 'Alika', 'Algernon', 'Alese', 'Aldrich', 'Aimie', 'Ahren', 'Agostino', 'Adric', 'Abimael', 'Abeer', 'Zoltan', 'Zedrick', 'Zan', 'Zana', 'Zaira', 'Zaid', 'Yuriana', 'Yu', 'Yousif', 'Yonatan', 'Yomara', 'Yehudah', 'Yasser', 'Yamile', 'Yahya', 'Wren', 'Wolfgang', 'Witney', 'Wil', 'Wilford', 'Welton', 'Wali', 'Vivianna', 'Vina', 'Viktor', 'Vic', 'Verne', 'Venice', 'Varonica', 'Vana', 'Valena', 'Unknown', 'Tyris', 'Tyna', 'Tyechia', 'Tuyen', 'Tully', 'Trinette', 'Tresha', 'Travion', 'Trapper', 'Tracyann', 'Tosh', 'Torris', 'Tonimarie', 'Tiphany', 'Timisha', 'Tiffinie', 'Tiffanny', 'Thuan', 'Thierry', 'Theodor', 'Teyona', 'Terrina', 'Terisa', 'Terilyn', 'Terez', 'Teresha', 'Tequita', 'Tel', 'Telina', 'Teasha', 'Tauna', 'Tata', 'Tashiana', 'Tashema', 'Taryne', 'Tarvis', 'Tarran', 'Taquia', 'Taniya', 'Tanica', 'Taneika', 'Tanay', 'Talmage', 'Sumner', 'Stehanie', 'Steele', 'Stacye', 'Sokha', 'Socrates', 'Sinclair', 'Simcha', 'Silva', 'Sigourney', 'Sian', 'Shraga', 'Shilah', 'Sherrika', 'Sherria', 'Shermeka', 'Sherin', 'Sherif', 'Sherene', 'Shenee', 'Shemica', 'Shella', 'Shelbey', 'Sheanna', 'Shayda', 'Shawntelle', 'Shawntavia', 'Shauntelle', 'Shatonya', 'Shatika', 'Shatera', 'Shastina', 'Sharna', 'Sharli', 'Shariff', 'Sharetta', 'Shardee', 'Shardea', 'Shaquitta', 'Shantai', 'Shannette', 'Shanieka', 'Shanesha', 'Shanese', 'Shaneen', 'Shandria', 'Shanara', 'Shamra', 'Shalia', 'Shakeitha', 'Shady', 'Shadeed', 'Sesar', 'Sereena', 'Senaida', 'Semaj', 'Selma', 'Sayed', 'Saxon', 'Santia', 'Sanna', 'Sandor', 'Sanam', 'Salma', 'Saadia', 'Ruperto', 'Rupert', 'Rudolf', 'Ruddy', 'Rozanne', 'Rozanna', 'Roshaunda', 'Roshanna', 'Rosevelt', 'Rosann', 'Ronnisha', 'Ronette', 'Ronetta', 'Ronel', 'Ronee', 'Rolonda', 'Rockie', 'Rj', 'Rika', 'Richrd', 'Richad', 'Reynolds', 'Reshawn', 'Resha', 'Renne', 'Renna', 'Rea', 'Ravon', 'Rasheida', 'Rashaud', 'Randolf', 'Rakeisha', 'Rajeev', 'Raizy', 'Rainy', 'Ragina', 'Raffi', 'Rachana', 'Quartez', 'Phuoc', 'Phung', 'Phillipe', 'Philemon', 'Phallon', 'Perfecto', 'Perez', 'Peng', 'Pattie', 'Parag', 'Oziel', 'Osmar', 'Osiris', 'Orren', 'Orly', 'Olivier', 'Nyeshia', 'Nyasia', 'Nuria', 'Nocole', 'Nishant', 'Nirali', 'Nikolos', 'Nieshia', 'Nichoel', 'Nichalas', 'Nhan', 'Nazia', 'Natan', 'Naketa', 'Najwa', 'Nafis', 'Nachum', 'Naaman', 'Mynor', 'Myka', 'Murad', 'Montie', 'Montanna', 'Mitzy', 'Mithcell', 'Mischa', 'Mirtha', 'Min', 'Minette', 'Mikhael', 'Mikaila', 'Michaelene', 'Merica', 'Meloney', 'Mehdi', 'Megon', 'Mazen', 'Maylin', 'Maylene', 'Mayda', 'Matty', 'Maryn', 'Marylu', 'Marwan', 'Marshae', 'Marnee', 'Marleny', 'Mariette', 'Mariaguadalupe', 'Maressa', 'Marcanthony', 'Makeba', 'Maja', 'Maija', 'Luci', 'Luan', 'Lorenda', 'Lisaann', 'Lin', 'Licia', 'Levell', 'Letoria', 'Letasha', 'Lesia', 'Leshaun', 'Leng', 'Lenette', 'Lenae', 'Leeandra', 'Lebron', 'Leaha', 'Leaann', 'Laytoya', 'Lawonda', 'Laurina', 'Laurena', 'Latyra', 'Latron', 'Latrica', 'Latitia', 'Latish', 'Lateasha', 'Lashika', 'Lasean', 'Lark', 'Laresa', 'Laqueena', 'Laniece', 'Lang', 'Lanay', 'Lamorris', 'Lamond', 'Lamia', 'Lakina', 'Lakeyia', 'Lajuana', 'Ladell', 'Ladawna', 'Labrandon', 'Kylea', 'Kristia', 'Kristee', 'Krissi', 'Krislyn', 'Kreig', 'Kollin', 'Kolleen', 'Kindel', 'Khristine', 'Khang', 'Kewanna', 'Keshana', 'Keron', 'Kensey', 'Kenith', 'Kendyll', 'Kendon', 'Kelan', 'Keishia', 'Keiko', 'Keevin', 'Kearra', 'Keala', 'Kawanda', 'Kaven', 'Katrese', 'Katilyn', 'Katiejo', 'Katiana', 'Katerine', 'Katelynne', 'Katalin', 'Katalina', 'Karleigh', 'Karilynn', 'Kareena', 'Karee', 'Kandiss', 'Kandise', 'Kammy', 'Kamika', 'Kameka', 'Kalila', 'Kalandra', 'Kaileen', 'Jw', 'Justeen', 'Jury', 'Jurell', 'Jovonda', 'Joshwa', 'Jones', 'Johnnetta', 'Johnhenry', 'Joh', 'Joany', 'Jimmylee', 'Jiles', 'Jessicaann', 'Jerson', 'Jeronica', 'Jermone', 'Jeremian', 'Jeorge', 'Jenniferann', 'Jennife', 'Jennessa', 'Jenean', 'Jenalyn', 'Jemima', 'Jeffifer', 'Jazzlyn', 'Jaylon', 'Jawanna', 'Jasimine', 'Jarmar', 'Jannel', 'Janan', 'Jamill', 'Jamile', 'Jamiee', 'Jamichael', 'Jamail', 'Jalena', 'Jakeb', 'Jad', 'Jacqulynn', 'Jacquilyn', 'Ivori', 'Ivorie', 'Ivon', 'Isla', 'Irina', 'Iran', 'Imad', 'Ilyse', 'Iban', 'Hina', 'Hezekiah', 'Heena', 'Hashim', 'Halli', 'Halima', 'Habib', 'Gwynne', 'Gwendolynn', 'Griselle', 'Graydon', 'Granville', 'Goerge', 'Gizelle', 'Ginnie', 'Ginia', 'Gerod', 'Georgeann', 'Gaurav', 'Gabrial', 'Fredrica', 'Frederico', 'Fradel', 'Flavia', 'Ferris', 'Ferrell', 'Fernandez', 'Feras', 'Felishia', 'Felipa', 'Feather', 'Fatina', 'Farris', 'Faris', 'Faheem', 'Eula', 'Etan', 'Estanislao', 'Ercia', 'Ephriam', 'Emy', 'Emmily', 'Elzie', 'Elsbeth', 'Elon', 'Ellsworth', 'Ellisha', 'Ellisa', 'Elizabth', 'Elbony', 'Eian', 'Eduard', 'Eda', 'Eberardo', 'Dutch', 'Durwin', 'Dovie', 'Dorion', 'Dorell', 'Dontavius', 'Donnielle', 'Doninique', 'Doni', 'Donia', 'Donetta', 'Donella', 'Doneisha', 'Dominga', 'Domanique', 'Dmario', 'Dimitris', 'Dillion', 'Digna', 'Diara', 'Dian', 'Dezeray', 'Dezaray', 'Devion', 'Detric', 'Destanie', 'Dessa', 'Dereka', 'Demont', 'Demarquis', 'Demarko', 'Delwyn', 'Delphine', 'Delois', 'Delinda', 'Deliah', 'Deleon', 'Delecia', 'Debi', 'Deanglo', 'Dayvon', 'Daysi', 'Dayla', 'Davaughn', 'Dashia', 'Darneshia', 'Darlyn', 'Darline', 'Darlena', 'Dariel', 'Daphnie', 'Daphnee', 'Danitza', 'Danie', 'Danella', 'Dameion', 'Dallan', 'Dalilah', 'Czarina', 'Cystal', 'Cyndy', 'Cushena', 'Crystol', 'Crystalee', 'Crystalann', 'Cristyn', 'Cricket', 'Courteney', 'Cosmo', 'Cortina', 'Cornelio', 'Corinda', 'Corene', 'Conway', 'Constantina', 'Cleophus', 'Cigi', 'Chrysta', 'Christien', 'Chiquitta', 'Chessie', 'Chesney', 'Cherina', 'Cher', 'Cherell', 'Chelci', 'Chay', 'Chavez', 'Charna', 'Charlynn', 'Charls', 'Charina', 'Chaney', 'Chakia', 'Celicia', 'Catlyn', 'Caron', 'Carmina', 'Carlus', 'Carlette', 'Carletha', 'Carime', 'Capricia', 'Camber', 'Calvert', 'Callen', 'Cala', 'Cadence', 'Burnell', 'Briant', 'Brewster', 'Brentton', 'Breeanne', 'Brecken', 'Braun', 'Boy', 'Boruch', 'Boe', 'Bich', 'Bethel', 'Bernell', 'Basim', 'Baldomero', 'Aylin', 'Avril', 'Authur', 'Audree', 'Aston', 'Askia', 'Ashlin', 'Ashanta', 'Asad', 'Artez', 'Artavia', 'Arlisha', 'Arlando', 'Arif', 'Arah', 'Aprile', 'Antonius', 'Antar', 'Annica', 'Anneka', 'Annastasia', 'Annastacia', 'Anjulie', 'Aneisha', 'Andrienne', 'Anastasha', 'Anaiz', 'Amita', 'Amelie', 'Amberleigh', 'Amaya', 'Amadeus', 'Alvino', 'Alvie', 'Allysia', 'Aliah', 'Albertina', 'Alandra', 'Alanda', 'Akisha', 'Akeia', 'Ahlam', 'Aditya', 'Achary', 'Abdallah', 'Aaryn', 'Aaisha', 'Zelma', 'Zeeshan', 'Zebedee', 'Zacheriah', 'Zacharie', 'Yvonna', 'Yumi', 'Youa', 'Yoseph', 'Yoni', 'Yitty', 'Yasin', 'Xochil', 'Winfield', 'Windell', 'Westin', 'Waverly', 'Waseem', 'Wafa', 'Viliami', 'Victorino', 'Vicenta', 'Vernisha', 'Ventura', 'Venise', 'Veda', 'Valrie', 'Vallerie', 'Valecia', 'Vahe', 'Ustin', 'Tziporah', 'Tyshia', 'Tyrie', 'Tyese', 'Tyan', 'Trenae', 'Tremel', 'Topaz', 'Tomisha', 'Tiyana', 'Titiana', 'Tiphani', 'Tion', 'Timoteo', 'Timesha', 'Tika', 'Tijuan', 'Tiffane', 'Tieshia', 'Tieisha', 'Tieara', 'Theadore', 'Theadora', 'Thadius', 'Tevis', 'Tessia', 'Terelle', 'Tenise', 'Teairra', 'Tasheba', 'Tashanda', 'Tarus', 'Taresa', 'Taralee', 'Tameca', 'Tamber', 'Talana', 'Takashi', 'Tahisha', 'Tahir', 'Taffany', 'Taelor', 'Symone', 'Symantha', 'Syeda', 'Sydne', 'Suzzette', 'Suong', 'Summar', 'Sulma', 'Sujey', 'Subrina', 'Stirling', 'Stevon', 'Stevee', 'Stesha', 'Stephano', 'Stefanee', 'Staphanie', 'Soraida', 'Somnang', 'Sok', 'Sofie', 'Slyvia', 'Simi', 'Sigrid', 'Signe', 'Siena', 'Shylo', 'Shuntae', 'Shulem', 'Shondell', 'Sherrina', 'Sherre', 'Shermika', 'Sherley', 'Shequila', 'Shelina', 'Sheika', 'Sheetal', 'Shawnita', 'Shawnette', 'Shawne', 'Shavona', 'Shaunita', 'Shatisha', 'Sharrie', 'Sharrell', 'Sharra', 'Sharlotte', 'Sharin', 'Shantoria', 'Shannyn', 'Shanine', 'Shanetra', 'Shaneria', 'Shamere', 'Shamera', 'Shamanda', 'Shalise', 'Shalaina', 'Shakiya', 'Shakeila', 'Shabana', 'Severo', 'Serafina', 'Selwyn', 'Selia', 'Seda', 'Sayra', 'Satara', 'Sarika', 'Sarath', 'Sarahbeth', 'Sarahanne', 'Saquan', 'Saprina', 'Sanita', 'Sandrea', 'Sanders', 'Sanaa', 'Samy', 'Salbador', 'Sabria', 'Ryanna', 'Rusti', 'Rubie', 'Roselynn', 'Roseline', 'Ronson', 'Roneshia', 'Romana', 'Rodrecus', 'Rockford', 'Robie', 'Robertlee', 'Rober', 'Riannon', 'Rhesa', 'Reynard', 'Renette', 'Renelle', 'Rendi', 'Rendell', 'Remi', 'Rekha', 'Rejeana', 'Rehana', 'Rebeckah', 'Reanne', 'Rayshon', 'Rayla', 'Rayburn', 'Rashawna', 'Rasean', 'Randol', 'Ramell', 'Ralston', 'Ralphael', 'Raissa', 'Raeleen', 'Radley', 'Race', 'Quin', 'Quenten', 'Quanda', 'Priscillia', 'Princeston', 'Precilla', 'Pieter', 'Phoenix', 'Pepper', 'Peder', 'Patton', 'Patrisia', 'Patina', 'Paisley', 'Onica', 'Omaira', 'Oma', 'Olufemi', 'Olubunmi', 'Olando', 'Odette', 'Odelia', 'Obadiah', 'Nyle', 'Nyiesha', 'Nyasha', 'Nnamdi', 'Niomi', 'Nico', 'Nicolo', 'Nicolai', 'Nickalaus', 'Nguyen', 'Ngozi', 'Nghia', 'Ndrew', 'Nathania', 'Narin', 'Nan', 'Nahshon', 'Nafeesah', 'Na', 'Nadira', 'Nadina', 'Mystie', 'Myrtle', 'Mylinh', 'Musa', 'Morganne', 'Montia', 'Moncia', 'Mitcheal', 'Missie', 'Mishelle', 'Mireille', 'Minna', 'Millissa', 'Mikkel', 'Michole', 'Michah', 'Mical', 'Merline', 'Merisa', 'Mera', 'Mel', 'Melaina', 'Meira', 'Megumi', 'Meghen', 'Meeka', 'Maurine', 'Maude', 'Mattea', 'Matia', 'Maryssa', 'Maron', 'Markeita', 'Marit', 'Maricia', 'Mariateresa', 'Mariaisabel', 'Marcey', 'Manolo', 'Man', 'Mandeep', 'Mali', 'Malaika', 'Mahalia', 'Maci', 'Lyric', 'Luisalberto', 'Luella', 'Luc', 'Lovina', 'Lorren', 'Loribeth', 'Lorelle', 'Loree', 'Lonell', 'Loida', 'Lizzet', 'Liseth', 'Lindell', 'Lessa', 'Lesleyanne', 'Leslea', 'Lerone', 'Leotis', 'Leor', 'Lenna', 'Lenisha', 'Lenin', 'Leesha', 'Lecia', 'Lc', 'Laycee', 'Lavera', 'Laurren', 'Lauraann', 'Latrise', 'Latriece', 'Latressa', 'Latessa', 'Laterra', 'Lateka', 'Lashon', 'Larell', 'Lander', 'Lamisha', 'Lamel', 'Lakishia', 'Lakisa', 'Lakela', 'Lakeith', 'Lakeena', 'Laith', 'Laisa', 'Lacye', 'Kyrsten', 'Krystyl', 'Krystalynn', 'Krupa', 'Kristyne', 'Kristianne', 'Konstance', 'Konnie', 'Kiwana', 'Kishia', 'Kindal', 'Kimisha', 'Kimberleigh', 'Kieu', 'Kiernan', 'Kiarra', 'Khari', 'Khalia', 'Keyan', 'Kewana', 'Kersten', 'Kerissa', 'Keoshia', 'Keonte', 'Kenric', 'Kenosha', 'Kenetra', 'Kendahl', 'Kemisha', 'Kelin', 'Keiara', 'Kealy', 'Kayvon', 'Kaysi', 'Kaydi', 'Katoya', 'Katlynn', 'Kashmir', 'Karyna', 'Karrissa', 'Karlin', 'Karia', 'Kareemah', 'Karan', 'Kaprice', 'Kamil', 'Kamilla', 'Kamica', 'Kamela', 'Kameisha', 'Kambria', 'Kama', 'Kaipo', 'Kain', 'Kailin', 'Jyl', 'Justyne', 'Jusitn', 'Junita', 'Juliene', 'Jovonne', 'Joushua', 'Jossue', 'Joshual', 'Joshlyn', 'Jordanne', 'Jolina', 'Johnelle', 'Johanne', 'Jillene', 'Jesusita', 'Jestina', 'Jessilyn', 'Jeslyn', 'Jesiah', 'Jerritt', 'Jerrit', 'Jerren', 'Jerrald', 'Jermine', 'Jermarcus', 'Jeriesha', 'Jenniferlynn', 'Jenita', 'Jenika', 'Jejuan', 'Jehnna', 'Jeffory', 'Jeannetta', 'Jb', 'Jazmyne', 'Jayma', 'Jayden', 'Jaya', 'Jaxon', 'Jawana', 'Jaritza', 'Jaris', 'Jaremy', 'Janele', 'Janah', 'Jamisha', 'Jamilia', 'Jamian', 'Jamesia', 'Jameshia', 'Jajaira', 'Jaina', 'Jacquita', 'Jacquiline', 'Jacole', 'Jacobe', 'Jackilyn', 'Jackalyn', 'Jabril', 'Jabier', 'Issaac', 'Ilea', 'Ikesha', 'Ijeoma', 'Iisha', 'Ignatius', 'Iasha', 'Huston', 'Hollyann', 'Hermelinda', 'Hazen', 'Harlin', 'Haily', 'Gyasi', 'Guthrie', 'Gumaro', 'Grabiela', 'Gill', 'Giang', 'Gerome', 'Gergory', 'Genessa', 'Gemayel', 'Gaylon', 'Gaven', 'Gatlin', 'Garvin', 'Gared', 'Galvin', 'Gala', 'Frida', 'Fransico', 'Franisco', 'Felisia', 'Felina', 'Faraz', 'Ezell', 'Evens', 'Evagelia', 'Eustacia', 'Eston', 'Essica', 'Esha', 'Erroll', 'Erinne', 'Erice', 'Era', 'Ennis', 'Emmylou', 'Emmanuela', 'Emilyn', 'Emilyann', 'Elwin', 'Elouise', 'Elonda', 'Eleshia', 'Eldred', 'Elbia', 'Elayne', 'Elam', 'Ekaterini', 'Egan', 'Edilberto', 'Ebonye', 'Dyane', 'Duyen', 'Durel', 'Dorina', 'Donyell', 'Dontray', 'Donnita', 'Donathan', 'Domini', 'Dmarcus', 'Dishon', 'Dior', 'Dionisio', 'Dinorah', 'Dinesha', 'Deundra', 'Desta', 'Derrica', 'Denzil', 'Denetria', 'Deneisha', 'Demitris', 'Demichael', 'Demaris', 'Delynn', 'Delmer', 'Deisi', 'Debbi', 'Deanndra', 'Deacon', 'Daylan', 'Dawud', 'Davian', 'Daveon', 'Darshan', 'Darry', 'Darelle', 'Dantrell', 'Dann', 'Danialle', 'Dam', 'Damesha', 'Dameka', 'Dalisha', 'Dajon', 'Cynda', 'Cuauhtemoc', 'Crist', 'Cris', 'Creed', 'Crawford', 'Coury', 'Coulter', 'Corneilus', 'Cord', 'Cletis', 'Clairissa', 'Cj', 'Cisco', 'Cira', 'Cicily', 'Chudney', 'Chrsitopher', 'Christifer', 'Christepher', 'Christeena', 'Chinyere', 'Chinita', 'Chinedu', 'Chenika', 'Chenay', 'Chayne', 'Chayla', 'Chaun', 'Charlesetta', 'Charistopher', 'Chardai', 'Chantia', 'Channell', 'Channelle', 'Chane', 'Chandel', 'Chalise', 'Chaley', 'Chai', 'Cedar', 'Caylee', 'Cassity', 'Casee', 'Caryl', 'Carolee', 'Carmelina', 'Carlito', 'Carling', 'Carianne', 'Carena', 'Caraline', 'Canisha', 'Candus', 'Campbell', 'Cam', 'Camielle', 'Camdon', 'Calyn', 'Caly', 'Calah', 'Cacey', 'Brooklin', 'Brogan', 'Brigida', 'Bridgid', 'Brena', 'Brayton', 'Braydon', 'Brannan', 'Braheem', 'Blossom', 'Blong', 'Blia', 'Bina', 'Billiejean', 'Bienvenido', 'Bibi', 'Bhavesh', 'Betheny', 'Berkley', 'Berenise', 'Bayley', 'Banessa', 'Bandon', 'Baily', 'Babygirl', 'Azia', 'Azariah', 'Aynsley', 'Avia', 'Avanti', 'Aurielle', 'Attila', 'Atom', 'Atlee', 'Atalie', 'Asusena', 'Asucena', 'Ashtin', 'Ashkan', 'Aryan', 'Artavius', 'Arnesha', 'Arlyn', 'Arlington', 'Ardell', 'Aran', 'Arabella', 'Aparna', 'Antwoin', 'Antonietta', 'Antigone', 'Antavius', 'Anothony', 'Annel', 'Anhthu', 'Angelisa', 'Angeli', 'Anela', 'Aneka', 'Andromeda', 'Andrianna', 'Andraya', 'Ame', 'Ameen', 'Amaryllis', 'Alpha', 'Allycia', 'Alizabeth', 'Aliana', 'Alexsis', 'Alexie', 'Alessa', 'Aleka', 'Aleen', 'Aldric', 'Alandis', 'Aixa', 'Aeisha', 'Adron', 'Adrienna', 'Adriano', 'Adin', 'Adeola', 'Adella', 'Abigael', 'Abena', 'Abelina', 'Abdulrahman', 'Abdulaziz', 'Abbigale', 'Aaliyah', 'Zonia', 'Zong', 'Zola', 'Zion', 'Zeno', 'Zed', 'Zandria', 'Zalika', 'Zakery', 'Zaina', 'Zahira', 'Yun', 'Yulonda', 'Yuki', 'Yong', 'Yoanna', 'Yetta', 'Yeni', 'Yasemin', 'Yanina', 'Yanette', 'Yaneth', 'Yamil', 'Yamaris', 'Xzavier', 'Xue', 'Xanthe', 'Wynn', 'Wykesha', 'Winslow', 'Wing', 'Wendolyn', 'Wenceslao', 'Wells', 'Washington', 'Waldemar', 'Waddell', 'Vivienne', 'Vivien', 'Vittorio', 'Virak', 'Viktoria', 'Viki', 'Verdell', 'Vennessa', 'Venetia', 'Velinda', 'Valissa', 'Valaree', 'Umair', 'Uchenna', 'Tyrik', 'Tynia', 'Tyffany', 'Tyanne', 'Tryone', 'Tristine', 'Trevar', 'Treasa', 'Trayvon', 'Travin', 'Toua', 'Tomica', 'Tivon', 'Tisa', 'Tiron', 'Tin', 'Tinia', 'Timtohy', 'Timia', 'Tiela', 'Thom', 'Tho', 'Thimothy', 'Theressa', 'Theran', 'Thara', 'Terrilyn', 'Terrall', 'Terrail', 'Teriann', 'Teodulo', 'Teniqua', 'Teniesha', 'Tenesia', 'Tekisha', 'Teka', 'Teesha', 'Tedi', 'Teddie', 'Tavin', 'Taura', 'Tasheika', 'Tasheema', 'Tashayla', 'Tashanna', 'Tarvaris', 'Tarnisha', 'Tarl', 'Taralynn', 'Tanicia', 'Taneeka', 'Tamkia', 'Tameria', 'Tamaria', 'Talonda', 'Talissa', 'Taleshia', 'Takila', 'Tahlia', 'Tahesha', 'Syrita', 'Syretta', 'Suni', 'Sulaiman', 'Stphanie', 'Stephene', 'Stephanine', 'Stepfanie', 'Srah', 'Sora', 'Sopheap', 'Sophat', 'Soo', 'Solina', 'Smita', 'Sindi', 'Simmie', 'Siearra', 'Sholanda', 'Sheyla', 'Shernita', 'Sherlyn', 'Sheritta', 'Sheriece', 'Sherece', 'Sherah', 'Shequitta', 'Shelsea', 'Shelaine', 'Shawntia', 'Shawnie', 'Shawnese', 'Shawndrea', 'Shavaughn', 'Shavana', 'Shauntea', 'Shaundrea', 'Shaul', 'Shateria', 'Sharolyn', 'Sharifah', 'Sharaya', 'Sharai', 'Shantil', 'Shannelle', 'Shanley', 'Shanin', 'Shanera', 'Shanena', 'Shandreka', 'Shandel', 'Shanai', 'Shamarr', 'Shalay', 'Shalaine', 'Shakir', 'Shakerra', 'Shaelyn', 'Severiano', 'Serah', 'Selicia', 'Sedale', 'Secret', 'Seanpatrick', 'Seann', 'Schneur', 'Scarlette', 'Sashia', 'Sary', 'Samona', 'Samanth', 'Samanthan', 'Sakeenah', 'Sai', 'Sabastian', 'Rydell', 'Ruven', 'Rulon', 'Roxan', 'Roslynn', 'Rosenda', 'Ronte', 'Ronnette', 'Ronnel', 'Ronelle', 'Rondal', 'Romulo', 'Romualdo', 'Rolf', 'Rodric', 'Rodman', 'Robbert', 'Rithy', 'Rissa', 'Rickia', 'Richy', 'Rhona', 'Rhian', 'Reshard', 'Renny', 'Renn', 'Rennie', 'Renetta', 'Renate', 'Rechelle', 'Recardo', 'Raysean', 'Raymar', 'Rayleen', 'Rashada', 'Raschelle', 'Ranika', 'Ranier', 'Ranelle', 'Ramzy', 'Ramses', 'Ramonda', 'Ramanda', 'Rama', 'Rakeem', 'Raheim', 'Rafiq', 'Raffinee', 'Qunisha', 'Quinette', 'Quindell', 'Quantia', 'Quandra', 'Qasim', 'Priti', 'Prisca', 'Pricila', 'Preeti', 'Porcia', 'Perlita', 'Pearlie', 'Pawel', 'Patrece', 'Pasha', 'Paden', 'Ozell', 'Ossie', 'Orry', 'Onika', 'Oneal', 'Olen', 'Olan', 'Octavian', 'Obrien', 'Nura', 'Normand', 'Nivea', 'Nitin', 'Nikeisha', 'Nidya', 'Nicolina', 'Nickisha', 'Nickia', 'Nicholi', 'Nichlas', 'Nicanor', 'Nicaela', 'Nhi', 'Nhia', 'Newell', 'Netasha', 'Nessa', 'Nely', 'Nelia', 'Nekeshia', 'Neilson', 'Neida', 'Neema', 'Naveed', 'Naureen', 'Naudia', 'Nathalia', 'Natacia', 'Nashika', 'Nasario', 'Nara', 'Nalleli', 'Nakima', 'Mykal', 'Morio', 'Moraima', 'Montrez', 'Monifa', 'Monico', 'Modesta', 'Mirranda', 'Mindee', 'Milka', 'Mikah', 'Mickeal', 'Mickael', 'Michiko', 'Messiah', 'Meriam', 'Mena', 'Melida', 'Mekia', 'Megean', 'Meeghan', 'Mclean', 'Mayme', 'Maylee', 'Maygan', 'Maxim', 'Maurissa', 'Mathis', 'Mashell', 'Marysia', 'Maryfrances', 'Martyn', 'Marshell', 'Marshelle', 'Marsela', 'Marlisha', 'Marlisa', 'Marlinda', 'Marki', 'Marjory', 'Marjan', 'Marilena', 'Marijo', 'Mariadel', 'Mar', 'Mareshah', 'Marche', 'Marcee', 'Mansoor', 'Mandrell', 'Manal', 'Maly', 'Mallisa', 'Mallarie', 'Malisha', 'Malgorzata', 'Maleka', 'Mairin', 'Mairead', 'Maigen', 'Macon', 'Lyra', 'Lynnell', 'Lynise', 'Lus', 'Lorra', 'Lorilee', 'Lorielle', 'Lorell', 'Lisanne', 'Lisabeth', 'Linsy', 'Lindon', 'Leviticus', 'Letecia', 'Lesleigh', 'Leshae', 'Leonides', 'Lenwood', 'Lennis', 'Lene', 'Leane', 'Laycie', 'Lavonia', 'Lavender', 'Lauria', 'Latresa', 'Latrena', 'Latreece', 'Latorria', 'Latissa', 'Lateia', 'Latecia', 'Latarra', 'Lashala', 'Laryn', 'Larson', 'Laraine', 'Laquasha', 'Lanier', 'Landra', 'Landa', 'Lanaya', 'Lanard', 'Lamichael', 'Lamanda', 'Lakyn', 'Lai', 'Ladarren', 'Lacreshia', 'Lacora', 'Lachanda', 'Labarron', 'Kyson', 'Kyree', 'Kym', 'Kylen', 'Kya', 'Kwesi', 'Kwan', 'Kruti', 'Kourtni', 'Kourtnie', 'Kourtnee', 'Kostas', 'Koryn', 'Koran', 'Kora', 'Komal', 'Kolbi', 'Kobi', 'Kizzie', 'Kiya', 'Kirstina', 'Kirra', 'Kinley', 'Kimia', 'Kimberle', 'Killian', 'Khristy', 'Khoi', 'Keyosha', 'Ketan', 'Keston', 'Kerisha', 'Kerensa', 'Kenyanna', 'Keno', 'Kenn', 'Kennetta', 'Keng', 'Keneisha', 'Kenecia', 'Kelon', 'Keithen', 'Keelin', 'Keelie', 'Kedar', 'Kaytlyn', 'Kayne', 'Kayna', 'Katryn', 'Kathaleen', 'Karrin', 'Karne', 'Karita', 'Karisma', 'Karishma', 'Karinne', 'Kamia', 'Kamar', 'Kaly', 'Kal', 'Kalicia', 'Kajuan', 'Kaily', 'Kaeley', 'Kaden', 'Kabrina', 'Kabir', 'Justa', 'Junie', 'Junaid', 'Judit', 'Jossie', 'Joshuwa', 'Joshu', 'Joshaua', 'Josedejesus', 'Joseantonio', 'Jorrell', 'Jorgen', 'Jorgeluis', 'Jordi', 'Jordann', 'Jonel', 'Johnwilliam', 'Johnthomas', 'Johntae', 'Johndaniel', 'Joab', 'Jiselle', 'Jibril', 'Jesusa', 'Jestine', 'Jessup', 'Jessieca', 'Jessamy', 'Jessaca', 'Jesalyn', 'Jerremy', 'Jerra', 'Jeronimo', 'Jermika', 'Jermanie', 'Jeralyn', 'Jeny', 'Jenson', 'Jennalynn', 'Jen', 'Jenilyn', 'Jenefer', 'Jemma', 'Jemal', 'Jeanny', 'Jeanett', 'Jayleen', 'Jathan', 'Jasmond', 'Jasmen', 'Jasdeep', 'Jarreau', 'Jarita', 'Jarelle', 'Jarah', 'Jaquana', 'Janitza', 'Janifer', 'Janesha', 'Janely', 'Janece', 'Jandi', 'Jamorris', 'Jamine', 'Jamesa', 'Jamarius', 'Jamaris', 'Jaklyn', 'Jaie', 'Jacyln', 'Jacklin', 'Jacklene', 'Jacen', 'Jabin', 'Iyesha', 'Iyanna', 'Ivelis', 'Isadora', 'Iona', 'Ioanna', 'Inger', 'Inge', 'Ilse', 'Illiana', 'Ilissa', 'Idania', 'Humphrey', 'Huma', 'Hue', 'Horatio', 'Honora', 'Honesty', 'Holt', 'Heron', 'Hasson', 'Hasina', 'Han', 'Halina', 'Haig', 'Hagen', 'Gustin', 'Gunner', 'Grissel', 'Grisell', 'Greogry', 'Godwin', 'Glynis', 'Gifford', 'Gerron', 'Gerilyn', 'Gerasimos', 'Gerado', 'Georgetta', 'Genee', 'Genae', 'Gaylord', 'Garreth', 'Garfield', 'Garey', 'Gardenia', 'Fredrika', 'Fredi', 'Fredie', 'Fransisca', 'Franki', 'Florencia', 'Felita', 'Fatema', 'Fallan', 'Falesha', 'Falan', 'Ezekial', 'Eveline', 'Evangela', 'Evamarie', 'Eugenie', 'Estefany', 'Estaban', 'Erol', 'Eris', 'Erina', 'Enzo', 'Emmanuella', 'Emelie', 'Emanuela', 'Elvina', 'Elric', 'Ellison', 'Elli', 'Elke', 'Elisse', 'Elisheba', 'Elidia', 'Edin', 'Earvin', 'Earline', 'Dyron', 'Durrel', 'Durand', 'Drayton', 'Dorien', 'Dontaye', 'Donnel', 'Domino', 'Dixon', 'Dinesh', 'Dimple', 'Dimetrius', 'Dickie', 'Diandria', 'Dezerae', 'Dewight', 'Devonta', 'Detrice', 'Desiderio', 'Deshonna', 'Deshonda', 'Deshana', 'Deserea', 'Desa', 'Deryck', 'Derrius', 'Derald', 'Depaul', 'Dennys', 'Denisia', 'Demita', 'Demesha', 'Delonta', 'Delayna', 'Delanie', 'Delane', 'Delaine', 'Deke', 'Deaundre', 'Dayon', 'Dayanna', 'Dawnmarie', 'Dawana', 'Davonne', 'Dasean', 'Darral', 'Darnetta', 'Darielle', 'Darel', 'Darcelle', 'Daralyn', 'Danyetta', 'Danyele', 'Danton', 'Danthony', 'Danon', 'Danise', 'Danique', 'Dangela', 'Danay', 'Damonique', 'Damali', 'Dalyn', 'Dal', 'Dalan', 'Dadrian', 'Dace', 'Cyndel', 'Cyndal', 'Crystin', 'Crystale', 'Cristoval', 'Cristiana', 'Crimson', 'Creston', 'Corynn', 'Cort', 'Conley', 'Colene', 'Colbi', 'Colbey', 'Clovis', 'Clover', 'Clarise', 'Ciearra', 'Cian', 'Christophere', 'Christol', 'Chrisandra', 'Ching', 'Chikita', 'Chico', 'Chevis', 'Cheria', 'Chequita', 'Chenita', 'Chenell', 'Chelsae', 'Chasitie', 'Charonda', 'Charnita', 'Chapin', 'Chantil', 'Chandrea', 'Chandell', 'Chalice', 'Chais', 'Cerise', 'Ceria', 'Ceirra', 'Cecillia', 'Caylie', 'Catrinia', 'Carlissa', 'Carlis', 'Canon', 'Candee', 'Cammi', 'Camesha', 'Camelle', 'Camella', 'Calina', 'Brysen', 'Bryann', 'Brondon', 'Brok', 'Brittnei', 'Brihany', 'Bridney', 'Briane', 'Brentin', 'Brendt', 'Breah', 'Brandyce', 'Brandolyn', 'Brandey', 'Braeden', 'Biran', 'Binyomin', 'Bertin', 'Bernardette', 'Benisha', 'Belle', 'Belkis', 'Bathsheba', 'Azusena', 'Azriel', 'Azra', 'Azadeh', 'Ayodele', 'Ayme', 'Ayaka', 'Avni', 'Avel', 'Auriel', 'Audre', 'Atoya', 'Atiba', 'Athanasia', 'Atasha', 'Asmar', 'Ashlan', 'Arwa', 'Artur', 'Artina', 'Artemis', 'Arrington', 'Arnisha', 'Arnie', 'Armel', 'Arlinda', 'Arletha', 'Arlan', 'Arla', 'Aristeo', 'Aries', 'Ariann', 'Aracelia', 'Antuane', 'Antoya', 'Ante', 'Annissa', 'Annamae', 'Anjel', 'Anjela', 'Anique', 'Angelie', 'Anecia', 'Andee', 'Amyjo', 'Amol', 'Ameena', 'Amdrew', 'Ambert', 'Amberlie', 'Amari', 'Alysson', 'Altonio', 'Alivia', 'Alishea', 'Alichia', 'Alexzandra', 'Alexys', 'Alexsander', 'Alexandera', 'Alece', 'Alda', 'Alayne', 'Ala', 'Ajit', 'Aiyana', 'Aigner', 'Agustine', 'Agnieszka', 'Aesha', 'Adrielle', 'Adonna', 'Adler', 'Adi', 'Adell', 'Addy', 'Abrina', 'Abrahm', 'Abelino', 'Aarti', 'Aarin', 'Aarica', 'Aakash', 'Zuleika', 'Ziad', 'Zenas', 'Zeina', 'Zalman', 'Zahir', 'Zacarias', 'Yvan', 'Yumiko', 'Yulissa', 'Yulanda', 'Ysidro', 'Ysenia', 'Youssef', 'York', 'Yolando', 'Yoland', 'Yiannis', 'Yarelis', 'Yaquelin', 'Yanna', 'Yaneris', 'Yale', 'Yakima', 'Yaa', 'Xiong', 'Worth', 'Woodley', 'Windsor', 'Willena', 'Willem', 'Wilfrido', 'Wilder', 'Wilda', 'Wilberto', 'Wilber', 'Westly', 'Wess', 'Waymond', 'Vuthy', 'Vonnie', 'Virgina', 'Virgen', 'Violette', 'Vinod', 'Vinita', 'Vinessa', 'Vester', 'Verlin', 'Veena', 'Vartan', 'Vaneza', 'Undra', 'Ulyses', 'Tysheka', 'Tyronn', 'Tyren', 'Tyonna', 'Tymeka', 'Tuongvi', 'Trysta', 'Tria', 'Treena', 'Traveon', 'Townsend', 'Toren', 'Tona', 'Tomothy', 'Tomislav', 'Tomie', 'Tomer', 'Tomara', 'Todrick', 'Tiya', 'Tiwana', 'Tisheena', 'Tirso', 'Tiquan', 'Tinika', 'Timotheus', 'Timber', 'Tiffanye', 'Tieasha', 'Tiasha', 'Thornton', 'Terisha', 'Terena', 'Terasha', 'Teondra', 'Teodora', 'Tenile', 'Tenee', 'Tenea', 'Temitope', 'Tell', 'Tejuan', 'Tejay', 'Teira', 'Tee', 'Tecora', 'Tawnia', 'Tawan', 'Tauren', 'Tassie', 'Tassia', 'Tashiba', 'Tashera', 'Tarry', 'Tarron', 'Taressa', 'Taraann', 'Tanzania', 'Tanequa', 'Tanekia', 'Tanee', 'Tanara', 'Tamerra', 'Tambria', 'Tallulah', 'Tallon', 'Talin', 'Taleisha', 'Taleen', 'Talal', 'Takina', 'Takenya', 'Takeila', 'Taji', 'Taisia', 'Taffy', 'Tafari', 'Taesha', 'Tacora', 'Syrena', 'Sylver', 'Sylivia', 'Suzzanne', 'Sun', 'Sundee', 'Sumeet', 'Su', 'Stephonie', 'Stepheny', 'Stephanos', 'Stephaney', 'Stefanos', 'Starlette', 'Starlena', 'Spence', 'Soyla', 'Sophan', 'Sophal', 'Song', 'Solana', 'Sitha', 'Sindia', 'Silvano', 'Siarra', 'Sia', 'Shyvonne', 'Shuntay', 'Shundrika', 'Shuan', 'Shrena', 'Shivonne', 'Shivon', 'Shiva', 'Shikita', 'Shikira', 'Shetara', 'Shervin', 'Sherron', 'Sherrilyn', 'Sherlonda', 'Sheretta', 'Sheray', 'Sherae', 'Shephanie', 'Shenique', 'Shenea', 'Shem', 'Shelise', 'Shelisa', 'Shelagh', 'Shealene', 'Shawntaya', 'Shatoria', 'Shaterra', 'Sharquita', 'Sharone', 'Sharnice', 'Sharnette', 'Sharmel', 'Sharica', 'Sharalyn', 'Sharah', 'Shaquilla', 'Shaqueta', 'Shanyn', 'Shantele', 'Shantaya', 'Shantara', 'Shanquita', 'Shanikqua', 'Shaneta', 'Shaneisha', 'Shanece', 'Shandee', 'Shalunda', 'Shalinda', 'Shaletta', 'Shakyra', 'Shakisha', 'Shakim', 'Shakenia', 'Shakemia', 'Shajuan', 'Sha', 'Shadai', 'Shacarra', 'Sevag', 'Serra', 'Seretha', 'Sequoya', 'Selah', 'Seiji', 'Secilia', 'Seanpaul', 'Schyler', 'Sasan', 'Saralee', 'Saraann', 'Sanuel', 'Samina', 'Saman', 'Salley', 'Salima', 'Salem', 'Saleena', 'Sakia', 'Saidah', 'Sadonna', 'Sachiko', 'Sachi', 'Sabreen', 'Sabin', 'Sabah', 'Ryker', 'Romy', 'Romon', 'Rollie', 'Rolan', 'Rody', 'Rodell', 'Rockwell', 'Robyne', 'Robi', 'Robecca', 'Rittany', 'Rindy', 'Rilee', 'Rihana', 'Rifka', 'Rickelle', 'Richar', 'Rhawnie', 'Reshonda', 'Renia', 'Reneisha', 'Remona', 'Regino', 'Regena', 'Rebekha', 'Reann', 'Raymondo', 'Raylon', 'Ravyn', 'Rasheka', 'Rashana', 'Ramondo', 'Ramey', 'Ramar', 'Rakesha', 'Rainbow', 'Rahman', 'Raheel', 'Radames', 'Rachna', 'Quyen', 'Quintell', 'Quintasha', 'Quinta', 'Quinita', 'Quinesha', 'Quatisha', 'Quashawn', 'Quantrell', 'Quante', 'Quanetta', 'Prudencio', 'Preethi', 'Porschea', 'Pj', 'Phineas', 'Philomena', 'Philicia', 'Phalon', 'Pessy', 'Percell', 'Penni', 'Penney', 'Pascale', 'Partick', 'Parth', 'Parks', 'Panayiota', 'Pam', 'Pal', 'Ozzy', 'Otisha', 'Otilia', 'Oshua', 'Onelia', 'Olusegun', 'Odilia', 'Odalis', 'Ocie', 'Nyema', 'Nour', 'Norwood', 'Nori', 'Noora', 'Noele', 'Noami', 'Nnenna', 'Nkechi', 'Nkauj', 'Nivia', 'Nisreen', 'Nira', 'Nimesh', 'Nikkolas', 'Nikeshia', 'Nikcole', 'Nicolasa', 'Nickalus', 'Nicholai', 'Nichoals', 'Niall', 'Nhu', 'Neiman', 'Negar', 'Necia', 'Ndidi', 'Nayda', 'Navy', 'Natina', 'Nathasha', 'Nathali', 'Nataya', 'Nashea', 'Narda', 'Nansi', 'Nakiea', 'Nai', 'Nadeen', 'Nabila', 'Mystique', 'Mylene', 'Murice', 'Mrk', 'Morton', 'Morgaine', 'Montavius', 'Montae', 'Moniqua', 'Moneka', 'Mitra', 'Mister', 'Miryam', 'Mily', 'Milana', 'Mikos', 'Miko', 'Mikey', 'Mikeisha', 'Michelangelo', 'Meyosha', 'Metta', 'Meshawn', 'Merlyn', 'Merilee', 'Meosha', 'Melisse', 'Melecio', 'Melanee', 'Meka', 'Meghanne', 'Mckinsey', 'Maurita', 'Maurilio', 'Mauricia', 'Maurica', 'Maudie', 'Matthe', 'Marylynn', 'Marykatherine', 'Marybell', 'Martrice', 'Marte', 'Marquisa', 'Marquee', 'Markey', 'Marico', 'Maricarmen', 'Mariavictoria', 'Marianela', 'Mariadelaluz', 'Marchell', 'Marcas', 'Manu', 'Mansour', 'Manpreet', 'Manan', 'Malvin', 'Makaila', 'Majorie', 'Maite', 'Maili', 'Magin', 'Maggy', 'Madia', 'Lynett', 'Lynea', 'Lynden', 'Luvenia', 'Lusia', 'Lurdes', 'Luna', 'Luiza', 'Lucan', 'Loyal', 'Louvenia', 'Lorine', 'Lorenz', 'Loreena', 'Loredana', 'Lorean', 'Lorah', 'Lonzell', 'Llesenia', 'Lizzett', 'Lizzete', 'Liv', 'Linus', 'Linton', 'Ling', 'Lindamarie', 'Lillianna', 'Lilliam', 'Liborio', 'Liat', 'Liann', 'Lian', 'Lexis', 'Lev', 'Levelle', 'Letty', 'Lettie', 'Letricia', 'Leshonda', 'Leshia', 'Lequisha', 'Lenzy', 'Lejon', 'Leib', 'Leanda', 'Lazar', 'Layce', 'Lawrance', 'Lavona', 'Lavaughn', 'Laurance', 'Latravis', 'Latori', 'Laterria', 'Laterrance', 'Laterica', 'Lashuna', 'Lashia', 'Lashaye', 'Lashane', 'Larue', 'Larrissa', 'Larrell', 'Larina', 'Laramy', 'Laquonda', 'Laquinn', 'Laquincy', 'Laquilla', 'Laporcha', 'Lanorris', 'Laneka', 'Lanea', 'Landy', 'Lancer', 'Lancelot', 'Lakysha', 'Laketra', 'Lakeasha', 'Lakara', 'Lajoya', 'Ladina', 'Ladena', 'Ladaris', 'Ladale', 'Lacosta', 'Kyoko', 'Kyanne', 'Kush', 'Krzysztof', 'Krystn', 'Krystian', 'Kristiann', 'Kristalynn', 'Krieg', 'Koree', 'Koral', 'Kolton', 'Kolina', 'Kodey', 'Knox', 'Kjirsten', 'Kjell', 'Kiyomi', 'Kirtis', 'Kirsty', 'Kirston', 'Kinisha', 'Kingston', 'Kinberly', 'Kimani', 'Kila', 'Kiet', 'Kierston', 'Kiela', 'Kiandra', 'Khandi', 'Khai', 'Keyatta', 'Keyandra', 'Ketra', 'Kesley', 'Keshawn', 'Kerron', 'Kerrick', 'Keonta', 'Keonda', 'Kentrel', 'Kennie', 'Kendrix', 'Kelyn', 'Keithan', 'Keionna', 'Keelia', 'Kaytie', 'Kayln', 'Katurah', 'Katrell', 'Katima', 'Kathreen', 'Kathia', 'Katessa', 'Katera', 'Kashonna', 'Kashara', 'Kaseem', 'Karthik', 'Karren', 'Karman', 'Karlis', 'Karista', 'Kandrea', 'Kalissa', 'Kaleo', 'Kalea', 'Kaja', 'Kaitlen', 'Kaileigh', 'Kaely', 'Kaelee', 'Kadin', 'Juwan', 'Justinn', 'Juniper', 'Junia', 'Junette', 'Juliocesar', 'Jua', 'Jt', 'Jozef', 'Joyanna', 'Jowanna', 'Jovanie', 'Josephus', 'Joselin', 'Josehua', 'Joseangel', 'Jorda', 'Joon', 'Jonique', 'Jonh', 'Jomo', 'Jomar', 'Jomarie', 'Jolanta', 'Johnston', 'Johnica', 'Johnesha', 'Johncharles', 'Johnathn', 'Joas', 'Joani', 'Joanathan', 'Joachim', 'Jimena', 'Jillmarie', 'Jhonathan', 'Jetaime', 'Jessicamarie', 'Jessicalynn', 'Jessamine', 'Jessalynn', 'Jes', 'Jermany', 'Jermale', 'Jerime', 'Jeoffrey', 'Jenniger', 'Jennalyn', 'Jenet', 'Jemia', 'Jemario', 'Jemarcus', 'Jediah', 'Jeanise', 'Jazz', 'Jazmen', 'Jayro', 'Jaynell', 'Jaynee', 'Jaylyn', 'Jaycob', 'Jawon', 'Javone', 'Javian', 'Javen', 'Javarus', 'Javares', 'Jaunita', 'Jaslynn', 'Jasamine', 'Jaruis', 'Jarrin', 'Jari', 'Jarae', 'Janny', 'Janeka', 'Janeisha', 'Janeil', 'Janeane', 'Jams', 'Jammy', 'Jamielyn', 'Jametta', 'Jamen', 'Jameisha', 'Jameil', 'Jamarkus', 'Jala', 'Jakki', 'Jakita', 'Jakara', 'Jaida', 'Jahira', 'Jahan', 'Jacqulene', 'Jacquise', 'Jacolby', 'Jaclyne', 'Jackline', 'Jackelin', 'Jabar', 'Jaala', 'Iwalani', 'Itzel', 'Isaih', 'Isael', 'Isaak', 'Iram', 'Inocencio', 'Indiana', 'Ilyssa', 'Ilia', 'Ildefonso', 'Ikechukwu', 'Ibraheem', 'Hyun', 'Huda', 'Hosanna', 'Hobie', 'Hillari', 'Hiep', 'Herschell', 'Herb', 'Helana', 'Hays', 'Hayli', 'Harout', 'Hara', 'Hannan', 'Hanifah', 'Hafsa', 'Gualberto', 'Gricel', 'Gregor', 'Graylin', 'Graceann', 'Graceanne', 'Glyn', 'Glenford', 'Gisel', 'Gianfranco', 'Gerold', 'Georgio', 'Gem', 'Gavino', 'Garner', 'Garan', 'Fuquan', 'Francia', 'France', 'Fraidy', 'Florentina', 'Felicha', 'Faydra', 'Fawna', 'Fauna', 'Farrel', 'Falynn', 'Fabrizio', 'Everson', 'Evalyn', 'Eunique', 'Eulogio', 'Ethen', 'Esta', 'Erving', 'Ervey', 'Errik', 'Erendida', 'Eon', 'Enza', 'Enrrique', 'Emmanuelle', 'Emiko', 'Emeline', 'Emberly', 'Elston', 'Elson', 'Elmore', 'Eliu', 'Elisabetta', 'Elisabel', 'Elija', 'Eliceo', 'Eliah', 'Elease', 'Elanda', 'Eisha', 'Einar', 'Efram', 'Ebonne', 'Eather', 'Dyrell', 'Dyna', 'Duong', 'Dugan', 'Drystal', 'Drusilla', 'Dorine', 'Dorie', 'Dorene', 'Dontrail', 'Donnesha', 'Doneshia', 'Dondi', 'Donaven', 'Domonigue', 'Domanic', 'Dishawn', 'Dionta', 'Dinna', 'Dieter', 'Diesha', 'Dezmon', 'Deyonna', 'Dewanda', 'Devine', 'Devaris', 'Deshanna', 'Desere', 'Derryck', 'Derrill', 'Derrico', 'Derel', 'Denyse', 'Denisa', 'Denine', 'Dempsey', 'Demitra', 'Demika', 'Delwin', 'Delrico', 'Delmon', 'Delmas', 'Dekendrick', 'Dejaun', 'Deeanne', 'Debralee', 'Deatra', 'Dawne', 'Davinia', 'Davielle', 'Dasia', 'Dashan', 'Darrly', 'Darrelle', 'Darra', 'Darnelle', 'Darnella', 'Darling', 'Darivs', 'Darina', 'Daphine', 'Daphanie', 'Danniell', 'Danel', 'Danamarie', 'Damin', 'Damica', 'Damarius', 'Damany', 'Dalaina', 'Daid', 'Daesha', 'Cythia', 'Cyrene', 'Cydnee', 'Cutter', 'Curley', 'Crystelle', 'Cristo', 'Cristhian', 'Crissie', 'Cresencio', 'Craigory', 'Courney', 'Countney', 'Coti', 'Corydon', 'Corky', 'Conchita', 'Colon', 'Collyn', 'Collene', 'Coleby', 'Colbert', 'Clementina', 'Clelia', 'Clea', 'Clavin', 'Clarie', 'Cidney', 'Chukwuemeka', 'Chrles', 'Christyl', 'Christna', 'Christmas', 'Christion', 'Christinea', 'Christinamarie', 'Christiann', 'Chriselda', 'Chivonne', 'Chivas', 'Chitara', 'Chistian', 'Chima', 'Chianti', 'Cheyanna', 'Chessa', 'Cherylynn', 'Cherrish', 'Cherity', 'Cheris', 'Cherika', 'Cheresa', 'Chereese', 'Cheena', 'Chauntae', 'Chaston', 'Chasta', 'Charyl', 'Charvis', 'Charquita', 'Charnette', 'Charnelle', 'Charmain', 'Charlise', 'Charleigh', 'Charitie', 'Chantry', 'Chantalle', 'Channy', 'Channin', 'Channah', 'Chanice', 'Chanele', 'Chanee', 'Chanay', 'Chamika', 'Chala', 'Chakira', 'Cerra', 'Cerena', 'Celisa', 'Celesta', 'Cecille', 'Catriona', 'Cathlyn', 'Catherin', 'Cate', 'Cassiopeia', 'Cassidie', 'Casha', 'Carvin', 'Carvell', 'Cartrell', 'Carrieanne', 'Carressa', 'Carols', 'Carnesha', 'Carmesha', 'Carmelle', 'Carlota', 'Carlon', 'Carlise', 'Carlesha', 'Caris', 'Caralee', 'Cantrell', 'Callee', 'Calixto', 'Calib', 'Calee', 'Cabrina', 'Byan', 'Byanca', 'Burgess', 'Buckley', 'Bryony', 'Bron', 'Brockton', 'Brittnye', 'Brittain', 'Britiney', 'Britiany', 'Britian', 'Brinda', 'Brettany', 'Brendy', 'Brandonn', 'Brandley', 'Brandace', 'Bram', 'Braedon', 'Bobie', 'Boaz', 'Billijo', 'Bhavin', 'Beverlee', 'Betzaida', 'Betsaida', 'Bertina', 'Berlinda', 'Berkeley', 'Berit', 'Benoit', 'Benjamim', 'Benard', 'Belal', 'Beck', 'Basya', 'Barnaby', 'Banesa', 'Bailie', 'Babette', 'Azim', 'Ayde', 'Aviv', 'Averill', 'Aven', 'Avelino', 'Avani', 'Austine', 'Auna', 'Aul', 'Audri', 'Atina', 'Astra', 'Ashten', 'Ashlynne', 'Ashleyanne', 'Arwen', 'Artia', 'Arlicia', 'Arley', 'Arlee', 'Arjuna', 'Aristides', 'Arista', 'Arisa', 'Arien', 'Ardith', 'Arasely', 'Aranda', 'Araina', 'Antonisha', 'Antonique', 'Annalea', 'Anjoli', 'Anisah', 'Aniello', 'Angellica', 'Aneshia', 'Andrzej', 'Andrus', 'Andriea', 'Andreya', 'Andreah', 'Anali', 'Analia', 'Anai', 'Anacani', 'Amrit', 'Amonda', 'Amish', 'Ambrosio', 'Amandia', 'Alys', 'Alysen', 'Alter', 'Allona', 'Alisen', 'Aliscia', 'Alireza', 'Algie', 'Alexzandria', 'Alexzander', 'Alexcia', 'Alexandar', 'Alesandro', 'Aleksandr', 'Aleksandar', 'Alcides', 'Albin', 'Albany', 'Alaya', 'Alainna', 'Akua', 'Aki', 'Akemi', 'Aisa', 'Aireal', 'Ailene', 'Agapito', 'Aftin', 'Africa', 'Adrin', 'Adonica', 'Abrahan', 'Abigal', 'Abbra', 'Zvi', 'Zubin', 'Zorina', 'Zora', 'Zofia', 'Zerrick', 'Zer', 'Zephaniah', 'Zehra', 'Zayra', 'Zaki', 'Zackariah', 'Zaccary', 'Yusuke', 'Yuriko', 'Yulia', 'Yonas', 'Yohance', 'Yitzchak', 'Ying', 'Yeshaya', 'Yentel', 'Yecheskel', 'Yasheka', 'Yaser', 'Yanelis', 'Yaneli', 'Yaira', 'Yadhira', 'Yaacov', 'Ximena', 'Xeng', 'Xavia', 'Wright', 'Winton', 'Willliam', 'Willette', 'Wheeler', 'Weslee', 'Wei', 'Wang', 'Wa', 'Wallis', 'Wagner', 'Vong', 'Vonetta', 'Vondell', 'Vinyette', 'Vineet', 'Vika', 'Victory', 'Vianney', 'Viana', 'Vessica', 'Vesna', 'Veronia', 'Vernal', 'Verlon', 'Verity', 'Verena', 'Venetta', 'Vencent', 'Vannak', 'Vanessamarie', 'Vander', 'Vanda', 'Vanassa', 'Va', 'Valynn', 'Valori', 'Valinda', 'Valeska', 'Valdemar', 'Valaria', 'Utopia', 'Una', 'Ulices', 'Tyshaun', 'Tyrina', 'Tyreik', 'Tyreece', 'Tymel', 'Tylicia', 'Tyishia', 'Tyffanie', 'Tyara', 'Turrell', 'Truc', 'Trivia', 'Triva', 'Tristia', 'Tristain', 'Trinika', 'Trini', 'Trimaine', 'Trevell', 'Treniece', 'Trenecia', 'Trenda', 'Trell', 'Trecia', 'Trayon', 'Travius', 'Traven', 'Tranquilino', 'Tranell', 'Tramayne', 'Tracina', 'Toye', 'Towanna', 'Toure', 'Torrian', 'Torren', 'Toribio', 'Toran', 'Tora', 'Tonyia', 'Tonna', 'Tonita', 'Tonique', 'Tondra', 'Tondalaya', 'Tomeshia', 'Tiwanna', 'Tishawna', 'Tinsley', 'Tinita', 'Tinea', 'Timoty', 'Timothey', 'Tilla', 'Tiffnay', 'Tiffanyann', 'Tiffannie', 'Tiawana', 'Tiauna', 'Tiajuana', 'Thoms', 'Thersa', 'Therron', 'Theresia', 'Thavy', 'Thatcher', 'Thary', 'Thadeus', 'Thaddeaus', 'Terrion', 'Terril', 'Terre', 'Terea', 'Tephanie', 'Teosha', 'Teofilo', 'Tenley', 'Tenita', 'Tenielle', 'Tenicia', 'Tenell', 'Teneil', 'Temple', 'Telma', 'Telecia', 'Tekoa', 'Tekeisha', 'Tejal', 'Teja', 'Tehani', 'Teenamarie', 'Tedric', 'Teddrick', 'Teague', 'Tayvon', 'Taysia', 'Taylore', 'Taylar', 'Tawonda', 'Tasneem', 'Tashieka', 'Tascha', 'Tarita', 'Tarel', 'Taquila', 'Tansy', 'Tannya', 'Tanina', 'Tanicka', 'Taneasha', 'Tandria', 'Tanaia', 'Tamsen', 'Tamiya', 'Tamikka', 'Talar', 'Talan', 'Takera', 'Takahiro', 'Tajuanna', 'Tajuan', 'Taija', 'Taheerah', 'Taggart', 'Taft', 'Tae', 'Tacoya', 'Taccara', 'Suresh', 'Suraj', 'Sung', 'Sultana', 'Suliman', 'Suellen', 'Sueellen', 'Stormey', 'Stepen', 'Starlyn', 'Starkeisha', 'Stachia', 'Sou', 'Sophana', 'Sony', 'Soctt', 'Sobia', 'Sita', 'Sioban', 'Sinthia', 'Simpson', 'Siddharth', 'Sicily', 'Siaosi', 'Shylah', 'Shunita', 'Shoshanna', 'Shonteria', 'Shone', 'Shneur', 'Shirlena', 'Shirell', 'Shirah', 'Shinika', 'Shikha', 'Shiesha', 'Sheyna', 'Sheva', 'Sherronda', 'Sherril', 'Sherriann', 'Sherrese', 'Sherkia', 'Sherisse', 'Sherissa', 'Sherilynn', 'Shereese', 'Shereece', 'Shepard', 'Shelonda', 'Shellyann', 'Shekira', 'Sheenna', 'Shealynn', 'Sheala', 'Shawntee', 'Shawnice', 'Shawnell', 'Shawnelle', 'Shavette', 'Shaterica', 'Shataya', 'Shasha', 'Sharnita', 'Sharnae', 'Sharmane', 'Sharlena', 'Sharissa', 'Sharieka', 'Sharicka', 'Sharetha', 'Sharen', 'Sharene', 'Shareema', 'Shareece', 'Sharan', 'Sharanda', 'Shaquoia', 'Shaquira', 'Shaquella', 'Shaquanta', 'Shantrel', 'Shantoya', 'Shanterria', 'Shann', 'Shaney', 'Shanessa', 'Shamire', 'Shamicka', 'Shameria', 'Shamecca', 'Shamaine', 'Shaleta', 'Shalea', 'Shalaya', 'Shakesha', 'Shaka', 'Shaira', 'Shai', 'Shailyn', 'Shahidah', 'Shaheem', 'Shadrach', 'Shadawn', 'Shacora', 'Shaana', 'Seville', 'Seve', 'Selin', 'Selinda', 'Segundo', 'Seena', 'Seaton', 'Seairra', 'Saverio', 'Savahna', 'Satyra', 'Saturnino', 'Sarit', 'Sarh', 'Sargon', 'Saretta', 'Sareena', 'Sarahlynn', 'Sarahelizabeth', 'Santez', 'Santania', 'Sanquetta', 'Sandhya', 'Samyra', 'Samora', 'Sameera', 'Sambath', 'Salvadore', 'Saleh', 'Saint', 'Saima', 'Sahwn', 'Sahil', 'Rynell', 'Rupa', 'Rumaldo', 'Rui', 'Ruel', 'Rubens', 'Roxsana', 'Roula', 'Roswell', 'Roselia', 'Roselee', 'Ronrico', 'Ronnita', 'Ronnika', 'Ronit', 'Ronique', 'Rondalyn', 'Ronan', 'Ronal', 'Rommy', 'Rome', 'Romain', 'Rolondo', 'Rohini', 'Rogue', 'Rogerick', 'Rodrigus', 'Rodrigues', 'Rodrickus', 'Rochele', 'Rishard', 'Rinaldo', 'Rik', 'Rikita', 'Rigoverto', 'Rickell', 'Rhen', 'Reynoldo', 'Revecca', 'Reo', 'Renso', 'Renell', 'Renecia', 'Renda', 'Remo', 'Remijio', 'Remigio', 'Reisha', 'Reginold', 'Recco', 'Rebel', 'Rebekan', 'Raysa', 'Raynette', 'Raymund', 'Rayfield', 'Ravis', 'Rattana', 'Rashi', 'Rashee', 'Rashauna', 'Rashanna', 'Raquell', 'Raquelle', 'Raphel', 'Raphaela', 'Ranson', 'Ranessa', 'Rane', 'Random', 'Randale', 'Ranada', 'Ramsay', 'Ramonia', 'Ramirez', 'Ramesh', 'Rakisha', 'Rakel', 'Raja', 'Raiza', 'Rainey', 'Raiford', 'Rahmell', 'Raheen', 'Raffael', 'Raeven', 'Raeshawn', 'Rad', 'Radha', 'Rachiel', 'Qunicy', 'Quisha', 'Quiona', 'Quintana', 'Quennel', 'Quenna', 'Quantina', 'Quantez', 'Quanette', 'Quaneisha', 'Quanah', 'Purcell', 'Princessa', 'Prestina', 'Prem', 'Poua', 'Pinchus', 'Pierson', 'Phoenicia', 'Phillippe', 'Phat', 'Peony', 'Peggie', 'Pattrick', 'Patrizia', 'Patrese', 'Patra', 'Paschal', 'Paradise', 'Panayiotis', 'Pagan', 'Padraig', 'Orval', 'Orson', 'Omara', 'Odin', 'Odie', 'Nzinga', 'Norissa', 'Noriko', 'Nohealani', 'Noal', 'Noa', 'Nixon', 'Nilesh', 'Nikko', 'Nijah', 'Niema', 'Nicolet', 'Nicolaas', 'Nicodemus', 'Niclole', 'Nickos', 'Nickcole', 'Nickalas', 'Nichlos', 'Nephi', 'Nekesha', 'Neila', 'Nechelle', 'Navia', 'Natonya', 'Natika', 'Natha', 'Nateshia', 'Natash', 'Nastashia', 'Nashae', 'Naseem', 'Nari', 'Napolean', 'Nakendra', 'Nakeeta', 'Nairobi', 'Nafeesa', 'Nadiya', 'Nadeige', 'Nabor', 'Nabeel', 'Mystery', 'Mylan', 'Mykisha', 'Myishia', 'Myda', 'Myah', 'Moustafa', 'Morrisa', 'Morrell', 'Morghan', 'Montrice', 'Monice', 'Mone', 'Monchell', 'Mohit', 'Mitesh', 'Mitchelle', 'Mistee', 'Mishell', 'Mirlande', 'Miri', 'Milos', 'Milessa', 'Mikiala', 'Mikail', 'Midori', 'Mickelle', 'Mickala', 'Michelene', 'Michea', 'Michalle', 'Michaeldavid', 'Mican', 'Micala', 'Miah', 'Meta', 'Meshell', 'Mery', 'Mervyn', 'Merrie', 'Merlinda', 'Mercede', 'Melondy', 'Melessa', 'Melchor', 'Mekayla', 'Meika', 'Meia', 'Mehul', 'Mehmet', 'Megham', 'Meggi', 'Meenakshi', 'Mckinzie', 'Mckayla', 'Mccoy', 'Maynor', 'Maxmillian', 'Maurisa', 'Mauri', 'Mauria', 'Mattlock', 'Mattison', 'Mattia', 'Matasha', 'Matan', 'Masiel', 'Masha', 'Marysa', 'Maryl', 'Marvette', 'Marucs', 'Mart', 'Martino', 'Martavius', 'Marshawn', 'Marquist', 'Marlise', 'Marlicia', 'Marland', 'Markiesha', 'Markeyta', 'Markeis', 'Markeese', 'Markcus', 'Marium', 'Mariluz', 'Marijane', 'Marielena', 'Maricus', 'Mariatheresa', 'Mariadelcarmen', 'Mariachristina', 'Marguetta', 'Margherita', 'Margarite', 'Margan', 'Marella', 'Marciano', 'Marcal', 'Maranatha', 'Manual', 'Manna', 'Mallie', 'Malek', 'Makoto', 'Makena', 'Makeia', 'Majesta', 'Mahmood', 'Magnus', 'Magnolia', 'Magic', 'Madina', 'Madai', 'Machael', 'Lyzette', 'Lyza', 'Lyonel', 'Lynnetta', 'Lyda', 'Lurena', 'Lucile', 'Luanna', 'Lowen', 'Loura', 'Louella', 'Lorrin', 'Lorraina', 'Lorn', 'Lor', 'Lorianna', 'Loriana', 'Lorenso', 'Lorence', 'Londell', 'Linzey', 'Linsdey', 'Linn', 'Linell', 'Linea', 'Lindzey', 'Lindie', 'Lilith', 'Liezl', 'Liem', 'Licet', 'Liba', 'Levis', 'Levern', 'Letticia', 'Letizia', 'Lera', 'Lequan', 'Leopold', 'Leontyne', 'Lenox', 'Lemont', 'Lemarr', 'Lelani', 'Lekita', 'Leith', 'Leisl', 'Leiloni', 'Leianna', 'Lehua', 'Ledarius', 'Lebaron', 'Laya', 'Laverna', 'Lavada', 'Lauree', 'Latoyah', 'Latonda', 'Lathisa', 'Laterrica', 'Latandra', 'Lastacia', 'Lashieka', 'Lasheika', 'Lashawnta', 'Lashaunta', 'Lary', 'Lari', 'Larico', 'Laquiesha', 'Laquida', 'Laporscha', 'Lao', 'Lannie', 'Landi', 'Lamarkus', 'Lakshmi', 'Lakiya', 'Lakethia', 'Lakeithia', 'Lakeidra', 'Laisha', 'Laiken', 'Laguanda', 'Lagena', 'Lafe', 'Laesha', 'Ladonya', 'Laderrick', 'Ladd', 'Ladarian', 'Lacory', 'Lacarla', 'Lacara', 'Lacandice', 'Labaron', 'Kyrstle', 'Kyndel', 'Kyara', 'Kwasi', 'Kwana', 'Kuuipo', 'Kumar', 'Kue', 'Krysteena', 'Kristylee', 'Kristoher', 'Kristilyn', 'Kristelle', 'Kriss', 'Kriselda', 'Kreston', 'Koty', 'Kostantinos', 'Kosha', 'Korry', 'Korrine', 'Korinna', 'Korena', 'Konica', 'Kongmeng', 'Kjersten', 'Kitt', 'Kittie', 'Kirstan', 'Kinyatta', 'Kinyata', 'Kinya', 'Kinesha', 'Kimyatta', 'Kimbley', 'Kimblery', 'Kima', 'Kilah', 'Kien', 'Kienan', 'Khira', 'Keystle', 'Kevia', 'Keundra', 'Ketsia', 'Keryn', 'Kern', 'Keric', 'Keonia', 'Keola', 'Kentaro', 'Kennya', 'Kennita', 'Kennethia', 'Keneth', 'Kendle', 'Kemia', 'Kely', 'Kelsee', 'Kellymarie', 'Kelii', 'Kelechi', 'Keishawn', 'Keirra', 'Kei', 'Kehinde', 'Kehaulani', 'Keeton', 'Keesa', 'Keenen', 'Kean', 'Keah', 'Kayshia', 'Kaysee', 'Kavitha', 'Katrece', 'Kathelyn', 'Katheleen', 'Katelynd', 'Kassidi', 'Kashira', 'Kartik', 'Karole', 'Karmyn', 'Karmin', 'Karlisha', 'Karlisa', 'Karema', 'Kaori', 'Kanoe', 'Kania', 'Kamrin', 'Kamelia', 'Kameelah', 'Kalman', 'Kallista', 'Kalliopi', 'Kallen', 'Kalika', 'Kalib', 'Kaleah', 'Kaiya', 'Kaiulani', 'Kaithlyn', 'Kailynn', 'Kailie', 'Kaija', 'Kaeo', 'Justi', 'Jurrell', 'Jumaane', 'Jull', 'Julious', 'Judie', 'Judea', 'Juanisha', 'Juanalberto', 'Jovaughn', 'Journey', 'Josilyn', 'Joshia', 'Joseline', 'Josa', 'Jontue', 'Jonquil', 'Jonn', 'Joli', 'Johua', 'Johnpatrick', 'Johnnell', 'Johnnathan', 'Johnanthony', 'Johm', 'Johathon', 'Johanthan', 'Joffrey', 'Joellyn', 'Joeanthony', 'Joeann', 'Jobe', 'Joaquim', 'Joannah', 'Jinelle', 'Jilliam', 'Jessina', 'Jeryl', 'Jerryd', 'Jerral', 'Jermery', 'Jerika', 'Jerick', 'Jeran', 'Jentry', 'Jency', 'Jenaya', 'Jemaine', 'Jebediah', 'Jeannett', 'Jeaneen', 'Jeanclaude', 'Jazelle', 'Jaylynn', 'Jaylin', 'Javell', 'Jassen', 'Jasman', 'Jasin', 'Jarrette', 'Jarmal', 'Jaran', 'Jaquanna', 'Jaquanda', 'Jannine', 'Jannae', 'Janique', 'Janeal', 'Janalyn', 'Janal', 'Jamol', 'Jameca', 'Jameal', 'Jaira', 'Jahna', 'Jafar', 'Jadine', 'Jacquez', 'Jacquese', 'Jacquella', 'Jacoba', 'Jackey', 'Jackelyne', 'Jackalynn', 'Jacek', 'Jaccob', 'Jabez', 'Jaamal', 'Iyana', 'Ivett', 'Ivery', 'Iven', 'Issiah', 'Islam', 'Isidore', 'Isauro', 'Isadore', 'Irisha', 'Irais', 'Indea', 'Illana', 'Ilaisaane', 'Ikeisha', 'Ieashia', 'Icholas', 'Ianna', 'Howie', 'Howell', 'Honor', 'Hollyn', 'Hollan', 'Hobert', 'Hoai', 'Hitomi', 'Hilliard', 'Hiba', 'Heyward', 'Hesham', 'Herve', 'Herson', 'Hernandez', 'Hermilo', 'Herby', 'Henny', 'Henery', 'Hebert', 'Hebah', 'Hawley', 'Hatem', 'Hasani', 'Hasaan', 'Haroon', 'Harmon', 'Harmonie', 'Haneefah', 'Hamed', 'Halim', 'Halimah', 'Halbert', 'Hagan', 'Haden', 'Hadassa', 'Habiba', 'Gwenn', 'Gunther', 'Graylon', 'Grahm', 'Gracia', 'Glynda', 'Glenny', 'Glenisha', 'Gissel', 'Gissela', 'Girard', 'Gilverto', 'Gerell', 'Geramie', 'Geovany', 'Geovanna', 'Georg', 'Georgena', 'Geofrey', 'Genika', 'General', 'Genea', 'Genavieve', 'Geffrey', 'Geanna', 'Gasper', 'Garylee', 'Garrit', 'Garo', 'Garnet', 'Gaines', 'Gaelen', 'Gabriell', 'Gabrella', 'Gabreil', 'Frazier', 'Fran', 'Foua', 'Fotini', 'Fortunato', 'Fiorella', 'Filicia', 'Filemon', 'Feliciana', 'Farooq', 'Farid', 'Fancy', 'Faithe', 'Fabrice', 'Fabienne', 'Eyad', 'Evy', 'Evony', 'Evetta', 'Evertt', 'Everton', 'Evelyne', 'Evann', 'Estuardo', 'Esgar', 'Esdras', 'Erric', 'Eriko', 'Eri', 'Ericson', 'Eria', 'Erez', 'Endy', 'Emre', 'Emmie', 'Emmanuell', 'Emmaline', 'Emigdio', 'Emelda', 'Emeka', 'Elzabeth', 'Elycia', 'Elvera', 'Ellyse', 'Ellena', 'Elle', 'Elizaeth', 'Elizabethanne', 'Elizabeht', 'Elita', 'Elice', 'Elessa', 'Eldrick', 'Elder', 'Elane', 'Ein', 'Eilene', 'Ehab', 'Edoardo', 'Ediberto', 'Edan', 'Edana', 'Eason', 'Earlisha', 'Dyann', 'Dwon', 'Duval', 'Dustine', 'Dustee', 'Dshawn', 'Drema', 'Dray', 'Dove', 'Donyetta', 'Donnelle', 'Doniel', 'Donel', 'Donecia', 'Dominiqua', 'Doc', 'Dock', 'Doanld', 'Dionisia', 'Dinisha', 'Didier', 'Dianira', 'Diamantina', 'Dewon', 'Dewarren', 'Dewaine', 'Devonn', 'Devery', 'Devario', 'Destani', 'Desirre', 'Desirie', 'Deshondra', 'Deshauna', 'Deshane', 'Derryl', 'Derrion', 'Deren', 'Deray', 'Dequincy', 'Deonica', 'Deondrae', 'Denys', 'Denyce', 'Denorris', 'Dennisha', 'Deniqua', 'Denina', 'Denene', 'Denay', 'Demorio', 'Demitrus', 'Demisha', 'Demian', 'Demetrie', 'Demarion', 'Deloren', 'Delmy', 'Deleena', 'Dekota', 'Dejan', 'Deeana', 'Dearl', 'Deane', 'Deamber', 'Daytona', 'Daymond', 'Dawnette', 'Dawaun', 'Davien', 'Davidmichael', 'Davena', 'Davarius', 'Datron', 'Dashanna', 'Dary', 'Daran', 'Daphna', 'Dao', 'Danylle', 'Danyle', 'Danile', 'Daniels', 'Dang', 'Damiana', 'Dalene', 'Dalal', 'Daira', 'Dainelle', 'Daffany', 'Dacey', 'Cyndia', 'Cybil', 'Crystalmarie', 'Cristle', 'Cristel', 'Cristabel', 'Creg', 'Courntey', 'Corwyn', 'Cornisha', 'Cornellius', 'Cormac', 'Corley', 'Cordia', 'Cordale', 'Conroy', 'Comfort', 'Colyn', 'Coco', 'Clorissa', 'Clintin', 'Clinten', 'Cleotha', 'Clenton', 'Claudius', 'Claudie', 'Clarivel', 'Clarance', 'Claiborne', 'Chung', 'Chrystopher', 'Chrystine', 'Chrstopher', 'Chrisy', 'Christropher', 'Christpoher', 'Christne', 'Christiopher', 'Christe', 'Christanna', 'Christalle', 'Chrishawn', 'Chontel', 'Chonte', 'Chiquetta', 'Chinenye', 'Chinda', 'Cheyla', 'Chett', 'Cherylyn', 'Cherissa', 'Chemise', 'Chelle', 'Chelise', 'Chelia', 'Chelcy', 'Cheetara', 'Chee', 'Chayse', 'Chawn', 'Chaunta', 'Chauna', 'Chassie', 'Chasiti', 'Chasady', 'Charnee', 'Charmagne', 'Charlsey', 'Chariti', 'Charish', 'Charels', 'Charae', 'Chaquana', 'Chaniqua', 'Chang', 'Chanette', 'Cha', 'Chalee', 'Chadney', 'Cezar', 'Cerina', 'Cera', 'Ceddrick', 'Ceaser', 'Cayci', 'Catricia', 'Catrena', 'Cathlene', 'Caterine', 'Catelin', 'Catarino', 'Cassandria', 'Carrol', 'Carrin', 'Carnelius', 'Carlynn', 'Carlen', 'Carinne', 'Carinna', 'Caresse', 'Careen', 'Caprisha', 'Canesha', 'Candies', 'Camry', 'Camey', 'Calysta', 'Calissa', 'Caitlen', 'Cadi', 'Byrant', 'Burgandy', 'Briza', 'Brittinie', 'Brittanni', 'Brison', 'Brinkley', 'Brindy', 'Bridgitte', 'Breyon', 'Brentt', 'Brently', 'Brenner', 'Brenan', 'Breigh', 'Breia', 'Brean', 'Braylon', 'Brannigan', 'Brandom', 'Brandilee', 'Boston', 'Bonner', 'Bon', 'Bobbyjo', 'Bobak', 'Blimie', 'Billyjoe', 'Bibiana', 'Biana', 'Bettye', 'Beryl', 'Bernhard', 'Berlin', 'Benn', 'Bela', 'Beena', 'Bashar', 'Barnabas', 'Barkley', 'Baker', 'Babajide', 'Ayonna', 'Ayasha', 'Avram', 'Ave', 'Autry', 'Aureliano', 'Audelia', 'Aubra', 'Athea', 'Asmaa', 'Asim', 'Asiah', 'Ashtyn', 'Ashok', 'Ashlyne', 'Ashling', 'Ashleyann', 'Asante', 'Ary', 'Arvind', 'Arrin', 'Arne', 'Arnel', 'Arly', 'Arlanda', 'Arissa', 'Arionne', 'Arienne', 'Ariell', 'Ariadna', 'Arben', 'Aquanetta', 'Apphia', 'Apostolos', 'Anup', 'Anuja', 'Antwonette', 'Antionne', 'Anthonie', 'Antasia', 'Annessa', 'Annaliza', 'Annaleigh', 'Annais', 'Annaalicia', 'Anival', 'Anglia', 'Angelito', 'Angelette', 'Andrika', 'Andrica', 'Andreka', 'Andreal', 'Andie', 'Anatasia', 'Analissa', 'Amylynn', 'Amylee', 'Amorette', 'Amna', 'Amela', 'Ameka', 'Ameera', 'Amberrose', 'Ambermarie', 'Amberli', 'Amantha', 'Amandra', 'Amandeep', 'Alynn', 'Alonia', 'Alondria', 'Almarosa', 'Allisen', 'Allene', 'Allecia', 'Alisson', 'Alis', 'Alim', 'Aleya', 'Alexanderia', 'Alejo', 'Aleese', 'Aleesa', 'Aleana', 'Alauna', 'Alaena', 'Akshay', 'Akio', 'Akim', 'Akiko', 'Akela', 'Akai', 'Aislynn', 'Aira', 'Ainslee', 'Aimy', 'Ai', 'Ahron', 'Agueda', 'Afiya', 'Adreanna', 'Adra', 'Adonnis', 'Adnrew', 'Adlai', 'Ademola', 'Adelyn', 'Adekunle', 'Adarius', 'Adara', 'Adah', 'Abu', 'Abrianna', 'Abrahim', 'Abiel', 'Abhishek', 'Aarn', 'Aaran', 'Zohra', 'Zoey', 'Zeinab', 'Zeena', 'Zebediah', 'Zaynab', 'Zakaria', 'Zacharey', 'Yusra', 'Yung', 'Yuko', 'Yukiko', 'Yukari', 'Ysabel', 'Yovani', 'Youlanda', 'Yoselyn', 'Yon', 'Yezenia', 'Yetunde', 'Yelitza', 'Yedidya', 'Yavonda', 'Yasir', 'Yang', 'Yamilette', 'Yamileth', 'Yalanda', 'Xia', 'Won', 'Wojciech', 'Willington', 'Wilfrid', 'Whitt', 'Whit', 'Whitley', 'Westen', 'Weslie', 'Wende', 'Wednesday', 'Waqas', 'Wanita', 'Wanisha', 'Wai', 'Wael', 'Vue', 'Vonn', 'Vishnu', 'Viraj', 'Vipul', 'Vikash', 'Vien', 'Victoriana', 'Vianna', 'Venesa', 'Vena', 'Vatche', 'Vasilis', 'Vashon', 'Varina', 'Vanya', 'Vanessia', 'Vanecia', 'Valincia', 'Valicia', 'Valerio', 'Valerieann', 'Valeriano', 'Vada', 'Uzoamaka', 'Uchechi', 'Tywanda', 'Tyshell', 'Tyrisha', 'Tyrek', 'Tynishia', 'Tynetta', 'Tynell', 'Tyneesha', 'Tymika', 'Tylynn', 'Tylesha', 'Tykisha', 'Tykesha', 'Tyke', 'Tyia', 'Tyhesha', 'Tyeson', 'Tyce', 'Twanisha', 'Turan', 'Trystan', 'Trudie', 'Trong', 'Trissa', 'Tricha', 'Trica', 'Trianna', 'Trevan', 'Tressia', 'Tres', 'Trenice', 'Trenee', 'Tremika', 'Tre', 'Treg', 'Travus', 'Travoris', 'Travonne', 'Travia', 'Traver', 'Trasha', 'Trammell', 'Tramane', 'Tramain', 'Towana', 'Toussaint', 'Torell', 'Tomoko', 'Tomesha', 'Tomekia', 'Tolulope', 'Tiziana', 'Tishina', 'Tishanna', 'Tishana', 'Tineka', 'Timekia', 'Timathy', 'Timara', 'Tighe', 'Tiffony', 'Tiffine', 'Tifanee', 'Tiearra', 'Tichelle', 'Tibisay', 'Tiani', 'Tiane', 'Tiaira', 'Tiago', 'Thompson', 'Theon', 'Theary', 'Thayer', 'Thaer', 'Texas', 'Tessy', 'Terrilynn', 'Terriann', 'Terrian', 'Teren', 'Teralyn', 'Tequisha', 'Tennile', 'Tennia', 'Tenisa', 'Tenica', 'Tempess', 'Temperance', 'Temia', 'Telesforo', 'Telena', 'Tekeshia', 'Tekesha', 'Tej', 'Tejas', 'Tehran', 'Teffany', 'Teejay', 'Teea', 'Teaya', 'Teaundra', 'Tearia', 'Teandre', 'Teagen', 'Taylon', 'Tavian', 'Tava', 'Tatia', 'Tashira', 'Tarnesha', 'Tareq', 'Tarena', 'Taquan', 'Tanjanika', 'Tang', 'Tangee', 'Tanda', 'Tamora', 'Tammra', 'Tamla', 'Tamirra', 'Tamilia', 'Tamecia', 'Tamaya', 'Tamario', 'Tamari', 'Tamaine', 'Talor', 'Tallie', 'Talishia', 'Talib', 'Taletha', 'Talbot', 'Tala', 'Takindra', 'Takima', 'Takeysha', 'Takeena', 'Takeela', 'Takecia', 'Takasha', 'Takarra', 'Taiwo', 'Tahra', 'Tahara', 'Tacoma', 'Tacia', 'Tab', 'Tabia', 'Tabethia', 'Taavon', 'Symeon', 'Syliva', 'Sylena', 'Sybrina', 'Susette', 'Susane', 'Sundae', 'Sumera', 'Suhey', 'Suhail', 'Suanne', 'Stratton', 'Stevin', 'Steveland', 'Stephanye', 'Stephana', 'Stepehn', 'Starrla', 'Starlett', 'Stafanie', 'Staceyann', 'Squire', 'Soua', 'Sotirios', 'Sotero', 'Sonni', 'Solon', 'Sokhom', 'So', 'Skylor', 'Skipper', 'Sinan', 'Silviano', 'Silbia', 'Sid', 'Sibyl', 'Shyanna', 'Shunteria', 'Shuntel', 'Shunda', 'Shruti', 'Shreya', 'Shreena', 'Shontelle', 'Shontaya', 'Shontavia', 'Shola', 'Shloime', 'Shiron', 'Shirleen', 'Shirlee', 'Shirita', 'Shin', 'Shinita', 'Shiniqua', 'Shimika', 'Shie', 'Shianna', 'Shian', 'Shiana', 'Shey', 'Sherryl', 'Sherryann', 'Sherna', 'Sherly', 'Sherille', 'Shequetta', 'Shenetta', 'Shenetra', 'Shene', 'Shenay', 'Shemicka', 'Shemeika', 'Shelle', 'Sheli', 'Shelene', 'Shelbe', 'Shekina', 'Shekima', 'Shekeya', 'Sheketa', 'Shekela', 'Sheilla', 'Sheelah', 'Shayn', 'Shaylah', 'Shawta', 'Shawntai', 'Shawniece', 'Shawneequa', 'Shavondra', 'Shavawn', 'Shavaun', 'Shavannah', 'Shauri', 'Shauntina', 'Shauntee', 'Shaunn', 'Shaunette', 'Shaughnessy', 'Shatyra', 'Shatiya', 'Shashana', 'Sharree', 'Sharnelle', 'Sharmila', 'Sharity', 'Sharis', 'Sharief', 'Shar', 'Sharenna', 'Shaquina', 'Shanya', 'Shantika', 'Shantez', 'Shanterica', 'Shantella', 'Shantale', 'Shanne', 'Shannara', 'Shanikka', 'Shanicqua', 'Shaneia', 'Shaneequa', 'Shandora', 'Shandie', 'Shandia', 'Shamonique', 'Shamone', 'Shamona', 'Shamina', 'Shamille', 'Shametra', 'Shamequa', 'Shambra', 'Shamaya', 'Shamarra', 'Shalona', 'Shalie', 'Shalice', 'Shaletha', 'Shalese', 'Shaleka', 'Shalayne', 'Shakoya', 'Shakinah', 'Shakiera', 'Shaketha', 'Shakenna', 'Shakendra', 'Shakeem', 'Shakeda', 'Shajuana', 'Shaindel', 'Shaida', 'Shahera', 'Shaguana', 'Shaconna', 'Shaconda', 'Shabazz', 'Shaakira', 'Seymour', 'Seyed', 'Severin', 'Setareh', 'Serrita', 'Serigo', 'Sequoyah', 'Sequan', 'Seqouia', 'Sentoria', 'Seleena', 'Sekou', 'Sekina', 'Sederick', 'Seddrick', 'Sebrena', 'Sea', 'Scotti', 'Sayaka', 'Savanha', 'Sausha', 'Saurabh', 'Sauel', 'Saroya', 'Sarde', 'Sarajo', 'Sapphira', 'Sanya', 'Santrice', 'Sanela', 'Sandria', 'Sandon', 'Sander', 'Sanah', 'Sammijo', 'Samie', 'Samarra', 'Samah', 'Saisha', 'Sahira', 'Safiyah', 'Safa', 'Sabas', 'Saara', 'Ryo', 'Rylie', 'Ryle', 'Rye', 'Rya', 'Rushabh', 'Rula', 'Rudie', 'Rozina', 'Roxxanne', 'Rosibel', 'Rosia', 'Rosey', 'Rosemaria', 'Roselie', 'Roschelle', 'Rosaria', 'Roopa', 'Rontrell', 'Ronn', 'Ronnica', 'Ronie', 'Roney', 'Rondy', 'Rondall', 'Ronalda', 'Romone', 'Romney', 'Romar', 'Romanda', 'Rola', 'Rohn', 'Rodrique', 'Rodderick', 'Rockell', 'Robrt', 'Robina', 'Risha', 'Rise', 'Rindi', 'Rinda', 'Rigel', 'Richel', 'Richanda', 'Richael', 'Ricard', 'Rhiannan', 'Rhet', 'Rhema', 'Rheana', 'Revae', 'Retta', 'Requita', 'Renel', 'Rendy', 'Rembert', 'Reko', 'Reka', 'Reine', 'Reiko', 'Reham', 'Regory', 'Reginaldo', 'Regginald', 'Reeshemah', 'Reesha', 'Redmond', 'Rechel', 'Rebcca', 'Rayven', 'Raymont', 'Rayce', 'Rawley', 'Raushanah', 'Rashmi', 'Rashika', 'Rashidi', 'Rashia', 'Rashed', 'Rasaan', 'Raneisha', 'Ranaldo', 'Ranald', 'Ramzi', 'Ramos', 'Ramonita', 'Ram', 'Ramina', 'Raman', 'Ralphel', 'Rajinder', 'Raji', 'Rajah', 'Rainier', 'Rain', 'Rahshawn', 'Rahel', 'Raechell', 'Rachelmarie', 'Rache', 'Rabecka', 'Quintus', 'Quintrell', 'Quintisha', 'Quintel', 'Qui', 'Quillan', 'Quentisha', 'Quentina', 'Queenie', 'Quashon', 'Quantisha', 'Purvis', 'Punam', 'Pritesh', 'Pricsilla', 'Pratik', 'Powell', 'Porshea', 'Pinar', 'Piers', 'Pierra', 'Piera', 'Phoua', 'Phillis', 'Philipe', 'Philbert', 'Philana', 'Phelicia', 'Phelan', 'Pervis', 'Persephone', 'Perris', 'Percival', 'Pegah', 'Paz', 'Payam', 'Paulita', 'Patterson', 'Patricie', 'Patria', 'Parry', 'Pari', 'Pandora', 'Pamla', 'Othello', 'Oskar', 'Ory', 'Orlan', 'Oris', 'Oona', 'Onterrio', 'Omri', 'Omair', 'Ohn', 'Odyssey', 'Octaviano', 'Oceana', 'Oakley', 'Nykole', 'Nyia', 'Nygel', 'Nyah', 'Nya', 'Nunzio', 'Nthony', 'Normajean', 'Noris', 'Nonie', 'Nochum', 'Njideka', 'Niyoka', 'Niva', 'Nithya', 'Nirvana', 'Niquita', 'Ninja', 'Ninamarie', 'Nikoleta', 'Nik', 'Niklaus', 'Nikka', 'Nikitta', 'Nidhi', 'Nicos', 'Nicosha', 'Nicoli', 'Nickolaos', 'Nicklous', 'Nichel', 'Nicasio', 'Niasha', 'Ngan', 'Neveen', 'Netra', 'Neri', 'Nekeia', 'Neka', 'Neftaly', 'Nazanin', 'Nawal', 'Navarro', 'Nava', 'Natthew', 'Natahsa', 'Nasya', 'Nashay', 'Nashawn', 'Narita', 'Narayana', 'Nancyann', 'Nancie', 'Nakieta', 'Nakedra', 'Nakeda', 'Nakea', 'Najma', 'Naji', 'Najib', 'Nairoby', 'Naiomi', 'Naheed', 'Naguan', 'Nadene', 'Nadean', 'Nachole', 'Myrella', 'Mylissa', 'Myiesha', 'Murry', 'Muna', 'Moya', 'Mortez', 'Moranda', 'Morad', 'Monque', 'Monik', 'Monesha', 'Moneika', 'Mohsin', 'Mitul', 'Mistina', 'Mishael', 'Mirza', 'Mirra', 'Mir', 'Mirinda', 'Minta', 'Milisa', 'Mikhaila', 'Mikeya', 'Mikesha', 'Mihcael', 'Mieka', 'Michiel', 'Michaelvincent', 'Micayla', 'Micale', 'Micaiah', 'Meshelle', 'Meryn', 'Merrissa', 'Merrilee', 'Merinda', 'Meredeth', 'Merced', 'Meoshia', 'Memorie', 'Melvyn', 'Melitza', 'Melissasue', 'Melindasue', 'Meleane', 'Meldoy', 'Melana', 'Meigan', 'Megnan', 'Meghana', 'Mechel', 'Meaghann', 'Mber', 'Mazin', 'Mayur', 'Mayumi', 'Mayo', 'Mayleen', 'Maurie', 'Matti', 'Matthen', 'Matisha', 'Marylyn', 'Marylouise', 'Marykathryn', 'Maryia', 'Maryetta', 'Marye', 'Maryclare', 'Maryclaire', 'Marvelous', 'Martize', 'Martiza', 'Martavious', 'Marshon', 'Marshia', 'Marsheena', 'Marranda', 'Marquies', 'Marquida', 'Marquesha', 'Marquesa', 'Marquerite', 'Marquelle', 'Marquan', 'Marnita', 'Marne', 'Marlowe', 'Marlissa', 'Marlenne', 'Marleigh', 'Markitta', 'Markida', 'Marketia', 'Marke', 'Markelle', 'Markella', 'Markela', 'Markeia', 'Markale', 'Marka', 'Marizol', 'Marison', 'Mariquita', 'Marinna', 'Marilin', 'Marili', 'Marigny', 'Marieta', 'Mariea', 'Marichelle', 'Margurite', 'Margrett', 'Margalit', 'Marcquis', 'Marchetta', 'Maral', 'Manya', 'Mansi', 'Manfred', 'Mando', 'Mandilyn', 'Mana', 'Maloree', 'Malini', 'Malin', 'Maliha', 'Malene', 'Male', 'Maleia', 'Malee', 'Malary', 'Malaina', 'Makila', 'Makeya', 'Makeisha', 'Maila', 'Mahina', 'Maheen', 'Mahealani', 'Magnum', 'Magalie', 'Madyson', 'Madilyn', 'Madelyne', 'Maddison', 'Maddalena', 'Madaline', 'Macrina', 'Mackenzi', 'Macio', 'Macarthur', 'Macall', 'Lynlee', 'Lynesha', 'Lyly', 'Luzmaria', 'Luvia', 'Lutisha', 'Ludia', 'Lucine', 'Lucina', 'Lucienne', 'Lucianna', 'Lovey', 'Lorry', 'Lorea', 'Lonetta', 'Lizzeth', 'Lizbet', 'Litany', 'Lisseth', 'Lislie', 'Lirio', 'Linsday', 'Linnie', 'Lindzie', 'Lindey', 'Linde', 'Linae', 'Lilyanne', 'Lilli', 'Liisa', 'Lieren', 'Libbie', 'Liani', 'Lezette', 'Leteshia', 'Leshay', 'Lesette', 'Lesbia', 'Leota', 'Leonila', 'Lensey', 'Lenord', 'Lennox', 'Lenea', 'Lenay', 'Lemario', 'Lelsie', 'Lekendrick', 'Lekeith', 'Lei', 'Lehi', 'Leevi', 'Leeland', 'Laytona', 'Lavenia', 'Lavarr', 'Laval', 'Laurann', 'Laurajean', 'Latrista', 'Latorie', 'Latonja', 'Latona', 'Latisia', 'Latif', 'Lateya', 'Latesa', 'Latavius', 'Latausha', 'Latangela', 'Laszlo', 'Lashaya', 'Lashawndra', 'Lashaunna', 'Larraine', 'Larra', 'Larosa', 'Larice', 'Laria', 'Larelle', 'Laray', 'Laquitha', 'Laquina', 'Laquia', 'Laqueisha', 'Laprecious', 'Lannette', 'Langdon', 'Lanetra', 'Laneice', 'Landria', 'Landin', 'Lamone', 'Lameisha', 'Lamare', 'Lamaar', 'Lakoya', 'Lakindra', 'Laketta', 'Lakeish', 'Lakedia', 'Lakashia', 'Lainie', 'Laguisha', 'Ladora', 'Ladeidra', 'Ladarious', 'Lacresia', 'Lacreasha', 'Lacourtney', 'Laconia', 'Lachrisha', 'Lachell', 'Labrian', 'Kystal', 'Kyran', 'Kynan', 'Kymberley', 'Kyland', 'Kyisha', 'Kyiesha', 'Kyera', 'Kyeisha', 'Kuulei', 'Kursten', 'Krystelle', 'Kristyann', 'Kristianna', 'Krissie', 'Krishonda', 'Krisheena', 'Krishana', 'Kricket', 'Koury', 'Kosta', 'Kortez', 'Korrina', 'Korrey', 'Korissa', 'Korine', 'Koji', 'Knut', 'Klaudia', 'Kitrina', 'Kita', 'Kirstopher', 'Kirin', 'Kiriaki', 'Kineta', 'Kindsey', 'Kinda', 'Kinard', 'Kimmy', 'Kimika', 'Kimarie', 'Kimanh', 'Kileen', 'Kijuana', 'Kiffany', 'Kieron', 'Kiely', 'Kiauna', 'Khuong', 'Khrystina', 'Khristen', 'Khalisha', 'Khaleel', 'Keyonda', 'Keyaira', 'Kewan', 'Kevis', 'Ketura', 'Ketrina', 'Kestrel', 'Kester', 'Kessa', 'Keshonda', 'Kery', 'Kerrigan', 'Kereem', 'Kerbi', 'Kenyotta', 'Kenyonna', 'Kenyona', 'Kenyan', 'Kenson', 'Kenora', 'Kennis', 'Kenni', 'Kennet', 'Kenise', 'Keni', 'Keniesha', 'Kenetha', 'Keneta', 'Kendi', 'Kendalyn', 'Kemal', 'Kelvina', 'Kelse', 'Kellis', 'Kellisha', 'Keller', 'Keitra', 'Keita', 'Keishawna', 'Keisa', 'Keeyana', 'Keelyn', 'Kedron', 'Keaundra', 'Keauna', 'Kearstin', 'Keanan', 'Kayde', 'Kayanna', 'Katura', 'Katrinna', 'Katora', 'Katja', 'Kathyleen', 'Kathya', 'Kathlynn', 'Kathline', 'Kathlena', 'Katerra', 'Kassim', 'Kassaundra', 'Kash', 'Kashina', 'Kashawna', 'Kashana', 'Karyl', 'Karriem', 'Karlon', 'Karinda', 'Karime', 'Karilee', 'Karesha', 'Karene', 'Karalynn', 'Kanetra', 'Kanetha', 'Kaneesha', 'Kandus', 'Kanda', 'Kamira', 'Kamel', 'Kamee', 'Kamecia', 'Kamaal', 'Kalla', 'Kalilah', 'Kalief', 'Kalei', 'Kaj', 'Kaitrin', 'Kaiser', 'Kainoa', 'Kailani', 'Kailah', 'Kaelynn', 'Kae', 'Jyoti', 'Jwan', 'Justis', 'Justene', 'Jung', 'Jule', 'Juleen', 'Judas', 'Juanna', 'Joylynn', 'Joylyn', 'Joyelle', 'Joyceann', 'Jovanda', 'Josselyn', 'Josph', 'Joson', 'Josi', 'Josias', 'Joshus', 'Joshuea', 'Josheua', 'Josetta', 'Josemiguel', 'Josecarlos', 'Jorja', 'Jordie', 'Jontel', 'Jonovan', 'Jonnelle', 'Jonika', 'Jone', 'Jonathandavid', 'Jolean', 'Jojo', 'Joia', 'Johnpeter', 'Johnn', 'Johni', 'Johnda', 'Johnchristopher', 'Johnanna', 'Joely', 'Joeanna', 'Joaquina', 'Jinnie', 'Jimmi', 'Jimell', 'Jillyn', 'Jillyan', 'Jillean', 'Jillayne', 'Jezreel', 'Jezebel', 'Jezabel', 'Jevin', 'Jessice', 'Jessen', 'Jesseka', 'Jervon', 'Jerrilyn', 'Jerrico', 'Jeromi', 'Jerode', 'Jerin', 'Jeriel', 'Jeriah', 'Jeremaih', 'Jeralynn', 'Jennise', 'Jennika', 'Jennifr', 'Jennifermarie', 'Jennett', 'Jennae', 'Jenipher', 'Jenille', 'Jenie', 'Jenesis', 'Jeneal', 'Jenalea', 'Jemeka', 'Jelena', 'Jehna', 'Jecory', 'Jebadiah', 'Jeannifer', 'Jeanita', 'Jeanet', 'Jeanee', 'Jazzmon', 'Jaynie', 'Jaymar', 'Jayesh', 'Jaydee', 'Jayci', 'Jaycie', 'Jawuan', 'Javid', 'Javed', 'Javarius', 'Jauan', 'Jasie', 'Jashawn', 'Jaselyn', 'Jarris', 'Jarriel', 'Jarold', 'Jarmel', 'Jarica', 'Jaquitta', 'Jaquis', 'Jaquilla', 'Jantz', 'Jann', 'Jannetta', 'Janneth', 'Janin', 'Janiesha', 'Janes', 'Janequa', 'Janeice', 'Janecia', 'Jamonte', 'Jamir', 'Jamina', 'Jamilynn', 'Jamicheal', 'Jamianne', 'Jamiah', 'Jamespaul', 'Jameria', 'Jamera', 'Jameila', 'Jameica', 'Jamala', 'Jamae', 'Jalisa', 'Jalana', 'Jaine', 'Jaimy', 'Jahvon', 'Jahmai', 'Jahanna', 'Jaffar', 'Jaems', 'Jady', 'Jadelyn', 'Jacquleen', 'Jacobie', 'Jaclin', 'Jackee', 'Jacintha', 'Jacara', 'Jabriel', 'Jabbar', 'Izaak', 'Iyonna', 'Iyona', 'Ivone', 'Ivis', 'Itzia', 'Italia', 'Isom', 'Isaia', 'Isabela', 'Irineo', 'Iraida', 'Inisha', 'Indalecio', 'Ilsa', 'Illiam', 'Ignasio', 'Iffany', 'Ife', 'Idrees', 'Idella', 'Icy', 'Ibeth', 'Iana', 'Ia', 'Hyatt', 'Hyacinth', 'Humza', 'Huan', 'Hiroshi', 'Hila', 'Hervey', 'Hersh', 'Herold', 'Herbie', 'Heraclio', 'Henrick', 'Hellena', 'Helder', 'Helaina', 'Heinz', 'Hedy', 'Havilah', 'Hava', 'Haunani', 'Hau', 'Hassen', 'Haskell', 'Harpreet', 'Haris', 'Haralambos', 'Hao', 'Hamzah', 'Hally', 'Halena', 'Hailie', 'Haider', 'Hae', 'Hadiya', 'Gwyn', 'Gwendalyn', 'Guenevere', 'Griffen', 'Grete', 'Gregoria', 'Gregary', 'Grayce', 'Glorimar', 'Glinda', 'Glenwood', 'Glennis', 'Giulio', 'Girl', 'Giovana', 'Ginni', 'Gevin', 'Gerred', 'Gerilynn', 'Georgeanne', 'Genine', 'Genieve', 'Genice', 'Genevia', 'Genette', 'Genese', 'Genesa', 'Geneen', 'Geddy', 'Geana', 'Gaspare', 'Garrette', 'Garcia', 'Gara', 'Gamal', 'Gadiel', 'Fulton', 'Froylan', 'Froilan', 'Friedrich', 'Fredrico', 'Francoise', 'Francie', 'Francesa', 'Fraida', 'Fotis', 'Fortino', 'Folashade', 'Florine', 'Florance', 'Fernado', 'Ferlando', 'Female', 'Feleshia', 'Feige', 'Faythe', 'Fatin', 'Faten', 'Fatemah', 'Fasha', 'Farzad', 'Faryn', 'Farshad', 'Farley', 'Farida', 'Falecia', 'Faizan', 'Faige', 'Ezzard', 'Eytan', 'Everet', 'Etty', 'Etoya', 'Esperansa', 'Esmond', 'Esmerelda', 'Eryca', 'Erricka', 'Erico', 'Eren', 'Enjolie', 'Endya', 'Emylee', 'Emileigh', 'Ellissa', 'Elizibeth', 'Elisah', 'Eligah', 'Eliesha', 'Elica', 'Eliberto', 'Eliane', 'Elen', 'Eleisha', 'Eleesha', 'Electra', 'Electa', 'Eleasha', 'Eira', 'Eiman', 'Efrat', 'Edvardo', 'Edurdo', 'Edouard', 'Edmon', 'Edina', 'Edi', 'Edelmiro', 'Edelmira', 'Eban', 'Dywane', 'Dyson', 'Dyshawn', 'Dward', 'Dwanna', 'Duwan', 'Dustn', 'Dustina', 'Dushawn', 'Durant', 'Dunte', 'Dunia', 'Duana', 'Drexel', 'Dragan', 'Doua', 'Dornell', 'Dorianne', 'Donyea', 'Dontre', 'Dontarius', 'Donnica', 'Doniesha', 'Dondrell', 'Donae', 'Dominika', 'Domineque', 'Dolan', 'Dniel', 'Dnaiel', 'Diva', 'Dionicia', 'Dinh', 'Dinelle', 'Dillan', 'Dierre', 'Diera', 'Diandrea', 'Diadra', 'Dezra', 'Dexton', 'Devri', 'Devra', 'Devita', 'Deval', 'Detron', 'Detoya', 'Desteny', 'Dessirae', 'Desma', 'Desira', 'Deshay', 'Deshanda', 'Deshae', 'Desarie', 'Deryl', 'Derrious', 'Derrelle', 'Derral', 'Derius', 'Derion', 'Dericka', 'Der', 'Derelle', 'Deran', 'Deontra', 'Deontrae', 'Deone', 'Deniesha', 'Denicia', 'Denessa', 'Denecia', 'Demonta', 'Delyla', 'Delphina', 'Delora', 'Delonna', 'Delmi', 'Delissa', 'Delio', 'Deldrick', 'Delante', 'Deion', 'Deerica', 'Debrina', 'Deaunte', 'Deangleo', 'Daylene', 'Dayle', 'Dayleen', 'Daya', 'Dawnya', 'Dawnisha', 'Dawnetta', 'Davonda', 'Daviel', 'Davell', 'Davan', 'Darya', 'Daruis', 'Dartanion', 'Darrol', 'Darroll', 'Darrnell', 'Darrik', 'Darriel', 'Darilyn', 'Dariana', 'Darcus', 'Darbi', 'Daquita', 'Daphane', 'Danyeal', 'Danyal', 'Dantae', 'Danne', 'Daniesha', 'Danicia', 'Daneshia', 'Damorris', 'Dammon', 'Damiel', 'Damarys', 'Daman', 'Da', 'Dalon', 'Daley', 'Dakisha', 'Dagny', 'Daffney', 'Dacian', 'Cyra', 'Cybill', 'Cyara', 'Curtrina', 'Curtissa', 'Crysti', 'Crystie', 'Crystallynn', 'Cristino', 'Crickett', 'Cressie', 'Crescentia', 'Creig', 'Cregg', 'Crandall', 'Covey', 'Courtne', 'Corynne', 'Corvetta', 'Cortne', 'Corryn', 'Correen', 'Cornesha', 'Coren', 'Coreena', 'Coralia', 'Contina', 'Constancia', 'Cong', 'Conchetta', 'Colvin', 'Collis', 'Colisha', 'Coleton', 'Colburn', 'Cochise', 'Clorinda', 'Clera', 'Cleavon', 'Clayborn', 'Claudina', 'Claudell', 'Cimberly', 'Cimarron', 'Cilia', 'Cielo', 'Cicero', 'Ciaira', 'Chukwuma', 'Chrystel', 'Chrstina', 'Christyne', 'Christorpher', 'Christhoper', 'Christerpher', 'Christelle', 'Christella', 'Christee', 'Christana', 'Christabel', 'Chrisma', 'Chole', 'Chisholm', 'Chinwe', 'Chinedum', 'Chimira', 'Chike', 'Chika', 'Chidi', 'Chey', 'Cheyenna', 'Chessica', 'Cheskel', 'Cheryll', 'Cheryle', 'Cherisa', 'Chenille', 'Chena', 'Chemere', 'Chelsia', 'Chelisa', 'Chelesa', 'Chelcey', 'Chelcee', 'Chea', 'Chaye', 'Chauntelle', 'Chauntay', 'Chasya', 'Chastine', 'Chasitty', 'Charnae', 'Charlye', 'Charlotta', 'Charlisse', 'Charlina', 'Charlett', 'Charika', 'Chaquetta', 'Chantilly', 'Chantille', 'Chantea', 'Chans', 'Channie', 'Chanh', 'Chandelle', 'Chandara', 'Chanc', 'Chancie', 'Chamia', 'Chameka', 'Chalese', 'Chaia', 'Chaela', 'Chade', 'Celise', 'Celestial', 'Celest', 'Ceilia', 'Cayetano', 'Caycee', 'Catya', 'Caton', 'Cathryne', 'Cathlin', 'Cassidee', 'Cassadie', 'Casidy', 'Casia', 'Casanova', 'Cartney', 'Cartier', 'Carsen', 'Caros', 'Carolin', 'Carnella', 'Carmelia', 'Carles', 'Carisma', 'Carilyn', 'Capria', 'Candiace', 'Candase', 'Canda', 'Cameisha', 'Cambri', 'Camaron', 'Camarie', 'Camala', 'Calliope', 'Calem', 'Cainan', 'Caden', 'Burak', 'Buffie', 'Bryttany', 'Bryton', 'Brytni', 'Bryston', 'Bryne', 'Bryheem', 'Bryen', 'Brya', 'Brucha', 'Brookelynn', 'Bronwen', 'Brnadon', 'Brittin', 'Brittant', 'Brittane', 'Briseida', 'Brint', 'Brianca', 'Bretney', 'Brenen', 'Brendin', 'Brendi', 'Brendaliz', 'Breaunna', 'Breanda', 'Bray', 'Branon', 'Brannen', 'Branndon', 'Brand', 'Brae', 'Bradie', 'Bradey', 'Bracken', 'Bora', 'Blandon', 'Bittany', 'Bishop', 'Binyamin', 'Bindi', 'Billyjack', 'Biagio', 'Bettyjo', 'Betsie', 'Benuel', 'Benjie', 'Benancio', 'Benaiah', 'Bekim', 'Beaux', 'Beauregard', 'Beatrize', 'Baylie', 'Bayan', 'Baudilio', 'Baudelio', 'Bassam', 'Basheer', 'Bashan', 'Basel', 'Bartolo', 'Bartlett', 'Bandy', 'Bambie', 'Bahar', 'Bahareh', 'Bach', 'Azad', 'Aysia', 'Ayse', 'Ayn', 'Ayman', 'Ayeshia', 'Ayelet', 'Aydin', 'Avon', 'Avigdor', 'Austina', 'Auren', 'Aurelie', 'Audley', 'Atonio', 'Ason', 'Ashlay', 'Ashla', 'Ashiya', 'Ashira', 'Asaf', 'Aryana', 'Artesha', 'Artavious', 'Arshad', 'Arren', 'Arnecia', 'Armandina', 'Arleta', 'Arland', 'Arlana', 'Ark', 'Aricka', 'Ariadne', 'Argentina', 'Arena', 'Archibald', 'Apryle', 'Aprilmarie', 'Aprill', 'Aoife', 'Antroine', 'Antonine', 'Antonieta', 'Antion', 'Anthoni', 'Anterrio', 'Anquinette', 'Annita', 'Annisha', 'Annique', 'Anni', 'Annice', 'Anjelina', 'Anina', 'Anik', 'Anielle', 'Anicia', 'Aniceto', 'Anglica', 'Angelise', 'Angelice', 'Angelea', 'Anesia', 'Anesa', 'Ane', 'Andron', 'Ananias', 'Anamda', 'Analiese', 'Amymarie', 'Amr', 'Ammanda', 'Aminta', 'Amen', 'Amelinda', 'Amdrea', 'Ambika', 'Amberia', 'Amberdawn', 'Ambera', 'Amarily', 'Amanie', 'Amandajo', 'Amana', 'Ama', 'Amadeo', 'Amabel', 'Alyx', 'Alyn', 'Aly', 'Alvon', 'Altariq', 'Alora', 'Almeda', 'Allsion', 'Allon', 'Allia', 'Alisyn', 'Alisse', 'Aliese', 'Aliea', 'Alicha', 'Alfredrick', 'Aleyna', 'Alexias', 'Alexes', 'Alexas', 'Alexan', 'Alexaner', 'Alexandrina', 'Aletta', 'Alechia', 'Aleatha', 'Aldwin', 'Aldin', 'Albina', 'Alban', 'Alania', 'Alandria', 'Alando', 'Alanah', 'Aladdin', 'Alacia', 'Alaa', 'Akina', 'Akesha', 'Ajene', 'Airika', 'Airiel', 'Airica', 'Aiko', 'Ahuva', 'Ahna', 'Agron', 'Afua', 'Aerika', 'Adryan', 'Adrew', 'Adolpho', 'Adham', 'Adewale', 'Adeana', 'Adana', 'Adamm', 'Adaline', 'Acey', 'Abi', 'Abdel', 'Aarion', 'Aadil', 'Zuleyka', 'Zubair', 'Ziyad', 'Zita', 'Ziomara', 'Zia', 'Zeus', 'Zeshan', 'Zephyr', 'Zenna', 'Zella', 'Zelene', 'Zeferino', 'Zebulen', 'Zebariah', 'Zayne', 'Zaynah', 'Zavion', 'Zasha', 'Zanetta', 'Zandrea', 'Zalmen', 'Zakiyah', 'Zahid', 'Zafirah', 'Zachrey', 'Zacharian', 'Zacariah', 'Yvon', 'Yvett', 'Yuvia', 'Yulisa', 'Yuji', 'Yudith', 'Yoselin', 'Yona', 'Yomayra', 'Yobani', 'Ymelda', 'Yisrael', 'Yevette', 'Yesika', 'Yenny', 'Yennifer', 'Yazan', 'Yaw', 'Yaseen', 'Yareli', 'Yanitza', 'Yanique', 'Yanessa', 'Yamira', 'Yajayra', 'Yair', 'Yahayra', 'Yaffa', 'Xandria', 'Wynonna', 'Wynona', 'Wynetta', 'Wylene', 'Wykisha', 'Wykeshia', 'Wray', 'Woodie', 'Wissam', 'Winn', 'Wilmary', 'Willilam', 'Willetta', 'Wilisha', 'Wilhemina', 'Wessley', 'Wenonah', 'Waylen', 'Vyron', 'Vonzell', 'Vontrell', 'Vonessa', 'Vivi', 'Vittoria', 'Vinton', 'Vincient', 'Vimal', 'Vidya', 'Vidhya', 'Victorio', 'Vicktoria', 'Vick', 'Vicken', 'Vibol', 'Vesta', 'Verronica', 'Vernonica', 'Verlinda', 'Veonica', 'Venesha', 'Velissa', 'Velina', 'Velicia', 'Velencia', 'Vaughan', 'Vassilios', 'Vashawn', 'Varsha', 'Vanny', 'Vannary', 'Vangie', 'Vanette', 'Vandell', 'Vallery', 'Valisa', 'Valenica', 'Valbona', 'Valari', 'Uzma', 'Usher', 'Urias', 'Urban', 'Uniqua', 'Undrea', 'Ulanda', 'Ugo', 'Tzivia', 'Tzipporah', 'Tyshema', 'Tyshelle', 'Tyronica', 'Tyrin', 'Tyria', 'Tyrhonda', 'Tyrene', 'Tyreka', 'Tynise', 'Tynica', 'Tymon', 'Tymber', 'Tylia', 'Tylen', 'Tylene', 'Tyleen', 'Tykeisha', 'Tyffani', 'Tyesa', 'Tyerra', 'Tychelle', 'Tyasia', 'Turhan', 'Turell', 'Tulio', 'Truly', 'Trixie', 'Tristy', 'Trinton', 'Trinisha', 'Trichelle', 'Treyvon', 'Trevonte', 'Trevion', 'Trentin', 'Trenisha', 'Trenika', 'Trene', 'Trenea', 'Trellis', 'Treanna', 'Treana', 'Travonta', 'Travious', 'Travian', 'Travelle', 'Travas', 'Travarus', 'Travares', 'Tranise', 'Traniece', 'Trandon', 'Trampus', 'Tralana', 'Tradd', 'Toy', 'Tove', 'Toshua', 'Tosca', 'Tor', 'Tore', 'Toree', 'Tonyetta', 'Tonnetta', 'Toniqua', 'Tonica', 'Tonga', 'Toneshia', 'Tonesha', 'Toneka', 'Toneisha', 'Tonee', 'Tobiah', 'Titania', 'Tishia', 'Tishawn', 'Tishara', 'Timur', 'Timoth', 'Timothee', 'Timi', 'Timarie', 'Timaree', 'Tilton', 'Tikeisha', 'Tija', 'Tiffny', 'Tiffeney', 'Tiffancy', 'Tiernan', 'Tierica', 'Tieka', 'Tiamarie', 'Thyda', 'Thorn', 'Thomson', 'Thomasine', 'Thoeun', 'Thoa', 'Thinh', 'Thia', 'Theordore', 'Theodus', 'Thelbert', 'Thedore', 'Teyana', 'Tex', 'Teven', 'Tesla', 'Teshara', 'Teryl', 'Tertia', 'Terrisa', 'Terricka', 'Terrial', 'Tericka', 'Terasa', 'Tequia', 'Tequan', 'Teppei', 'Teonia', 'Tenna', 'Teneya', 'Tenequa', 'Tenelle', 'Temisha', 'Temekia', 'Telesha', 'Telah', 'Tekla', 'Teiara', 'Tehila', 'Teegan', 'Tearle', 'Taz', 'Tayanna', 'Tawsha', 'Tawain', 'Tavius', 'Tavish', 'Tavio', 'Tavaras', 'Taureon', 'Taundra', 'Tauheedah', 'Tasnim', 'Tashunda', 'Tashonna', 'Tashenna', 'Tashelle', 'Tashawnda', 'Tashae', 'Taryll', 'Tarun', 'Tarria', 'Taronda', 'Taro', 'Tarna', 'Tarissa', 'Tarisha', 'Tarique', 'Tarica', 'Tarha', 'Tarez', 'Taree', 'Taras', 'Taquoya', 'Tanyia', 'Tannette', 'Taneya', 'Tanetta', 'Tanera', 'Tanasia', 'Tamoya', 'Tamillia', 'Tamila', 'Tamella', 'Tamecka', 'Tamea', 'Tambi', 'Tamare', 'Tamaira', 'Talley', 'Talika', 'Taleasha', 'Talayah', 'Takyra', 'Takeria', 'Takendra', 'Takeesha', 'Tairra', 'Ta', 'Taeisha', 'Tadeusz', 'Taci', 'Tabita', 'Syndy', 'Sylina', 'Syble', 'Sweet', 'Susi', 'Susa', 'Summers', 'Sumit', 'Suman', 'Suly', 'Sullivan', 'Suleiman', 'Sueanne', 'Sudeep', 'Suan', 'Suad', 'Stpehen', 'Stony', 'Stina', 'Stevyn', 'Stevette', 'Stephenson', 'Stephens', 'Stepfon', 'Sten', 'Starnisha', 'Starlynn', 'Starlina', 'Starkisha', 'Stanely', 'Stalin', 'Staley', 'Srinivas', 'Sophanna', 'Sonora', 'Sonnia', 'Sonnet', 'Solveig', 'Solangel', 'Sojourner', 'Soila', 'Sohrab', 'Snow', 'Smauel', 'Skyeler', 'Sirron', 'Sion', 'Siobahn', 'Simran', 'Sim', 'Silvina', 'Silena', 'Sila', 'Sierria', 'Sianna', 'Siana', 'Shyler', 'Shuree', 'Shuntavia', 'Shundreka', 'Shua', 'Shrita', 'Shontai', 'Shonika', 'Shoni', 'Shonetta', 'Shonelle', 'Sho', 'Sholonda', 'Shmeka', 'Shiv', 'Shital', 'Shiri', 'Shiraz', 'Shineka', 'Shiketa', 'Shiann', 'Sheyenne', 'Shevelle', 'Sheterica', 'Sherylann', 'Sherrel', 'Sherquita', 'Sherian', 'Sheren', 'Shere', 'Shenisha', 'Sheniece', 'Shenicka', 'Shenice', 'Shenica', 'Shenequia', 'Shenandoah', 'Shellina', 'Shelese', 'Sheleena', 'Shelah', 'Sheka', 'Sheilamarie', 'Shehzad', 'Sheen', 'Sheenah', 'Sheema', 'Sheddrick', 'Shayvonne', 'Shayron', 'Shayon', 'Shaylen', 'Shawona', 'Shawntez', 'Shawnise', 'Shawnique', 'Shawnika', 'Shawnetta', 'Shawnesha', 'Shawnequa', 'Shawneen', 'Shawndrika', 'Shawndale', 'Shawnae', 'Shavonte', 'Shavita', 'Shavina', 'Shauntrice', 'Shauntavia', 'Shaunika', 'Shaunelle', 'Shaunel', 'Shatrice', 'Shatonna', 'Shatonia', 'Shaterrica', 'Shateka', 'Shatarra', 'Shatanya', 'Shata', 'Sharronda', 'Sharonn', 'Sharnise', 'Sharne', 'Sharnay', 'Sharmayne', 'Sharley', 'Sharletta', 'Sharkia', 'Shariece', 'Sharida', 'Shariann', 'Shariah', 'Sharesa', 'Shardi', 'Shardey', 'Sharad', 'Shaqwana', 'Shaquna', 'Shaquela', 'Shantya', 'Shantivia', 'Shantiel', 'Shanterra', 'Shantail', 'Shannice', 'Shankar', 'Shanka', 'Shanitta', 'Shanigua', 'Shanet', 'Shaneca', 'Shaneaka', 'Shandelle', 'Shance', 'Shanaz', 'Shamya', 'Shammara', 'Shamella', 'Shamela', 'Shamaria', 'Shamaka', 'Shalyce', 'Shallen', 'Shalin', 'Shalan', 'Shalandria', 'Shakka', 'Shakeyla', 'Shakevia', 'Shakedra', 'Shahzad', 'Shahla', 'Shahida', 'Shaheerah', 'Shahanna', 'Shahana', 'Shafiq', 'Shaen', 'Shaelynn', 'Shaelene', 'Shadie', 'Shadee', 'Shadaya', 'Sevan', 'Seung', 'Serrina', 'Serria', 'Serrena', 'Sergei', 'Serenna', 'Sequia', 'Sequana', 'Senta', 'Senequa', 'Semone', 'Selim', 'Selenne', 'Searra', 'Seara', 'Seaira', 'Schneider', 'Sayuri', 'Saysha', 'Savvas', 'Savoeun', 'Savhanna', 'Savahanna', 'Satomi', 'Satia', 'Sateria', 'Sasheen', 'Saroun', 'Saroeun', 'Sarin', 'Sarica', 'Saren', 'Sarajane', 'Sarae', 'Sapan', 'Santosh', 'Sanovia', 'Sanora', 'Sanjiv', 'Sanika', 'Sandrika', 'Sanaz', 'Samule', 'Samuell', 'Samuele', 'Samory', 'Samiyah', 'Samika', 'Samantah', 'Samanda', 'Saly', 'Salote', 'Sallyann', 'Salicia', 'Salam', 'Salah', 'Sakura', 'Sairah', 'Sahib', 'Sadiyya', 'Sadiq', 'Sadi', 'Sadarian', 'Sadae', 'Sacheen', 'Sabrine', 'Sabrenia', 'Sabreena', 'Sabrea', 'Ryu', 'Ryosuke', 'Ryna', 'Ryheem', 'Ryanlee', 'Ruy', 'Ruthy', 'Ruthanna', 'Rukiya', 'Rufina', 'Ruchi', 'Rozalyn', 'Rozalind', 'Royale', 'Rothana', 'Rossy', 'Rossi', 'Rosland', 'Roshundra', 'Rosheena', 'Rosheda', 'Roshana', 'Rosena', 'Roselle', 'Roselina', 'Rosamond', 'Rosaleen', 'Rosaelena', 'Ronya', 'Ronney', 'Roneka', 'Rondi', 'Rondel', 'Romondo', 'Romie', 'Romeka', 'Romale', 'Rolly', 'Rolandas', 'Roisin', 'Roche', 'Rocheal', 'Robynne', 'Roanna', 'Riyad', 'Ritu', 'Rith', 'Ristin', 'Riko', 'Ricquita', 'Rickita', 'Ricka', 'Richerd', 'Richardson', 'Riann', 'Rianne', 'Rhondalyn', 'Rhoderick', 'Rheanne', 'Rhapsody', 'Rhandi', 'Reynol', 'Revis', 'Revel', 'Reve', 'Reta', 'Reshunda', 'Requel', 'Renier', 'Reneta', 'Renessa', 'Reneka', 'Renaud', 'Renald', 'Rekita', 'Rekia', 'Regnald', 'Reginia', 'Reggina', 'Redell', 'Rebella', 'Rebecah', 'Rebakah', 'Ream', 'Rc', 'Raziel', 'Rayshell', 'Rayshan', 'Rayon', 'Raynold', 'Raynisha', 'Raylynn', 'Rayland', 'Raye', 'Ravan', 'Ratha', 'Rasul', 'Rasan', 'Rany', 'Ransen', 'Rankin', 'Ranjit', 'Raniesha', 'Raney', 'Randalyn', 'Ranardo', 'Ramia', 'Ramero', 'Rajani', 'Rainie', 'Rahn', 'Raha', 'Rafi', 'Rafik', 'Raechal', 'Rackel', 'Rachale', 'Raashida', 'Quwan', 'Qushawn', 'Quron', 'Quinzell', 'Quintessa', 'Quinnita', 'Quienton', 'Quentez', 'Quentella', 'Quenesha', 'Quay', 'Quason', 'Quantarius', 'Quanta', 'Purnell', 'Puaolena', 'Puanani', 'Pual', 'Printice', 'Princes', 'Princella', 'Pricillia', 'Prescious', 'Pratima', 'Pranay', 'Porcsha', 'Ponciano', 'Pinky', 'Phyllip', 'Phyllicia', 'Phylis', 'Phu', 'Philadelphia', 'Per', 'Pepsi', 'Penn', 'Peggi', 'Pearline', 'Pearla', 'Paulanthony', 'Patrecia', 'Pascha', 'Paraskevi', 'Pansy', 'Pamelia', 'Ottis', 'Otniel', 'Otavia', 'Osmond', 'Osborne', 'Osamah', 'Orland', 'Orie', 'Orestes', 'Orenthal', 'Orelia', 'Oral', 'Onyx', 'Onix', 'Onisha', 'Onesimo', 'Oneill', 'Onalee', 'Omolola', 'Omolara', 'Omesha', 'Omarr', 'Oluwatosin', 'Oluwakemi', 'Oluchi', 'Olegario', 'Olawale', 'Olatokunbo', 'Olanrewaju', 'Olaf', 'Olabode', 'Ogden', 'Octavis', 'Obrain', 'Obdulio', 'Nyya', 'Nyshia', 'Nyomi', 'Nyles', 'Nowell', 'Novia', 'Noura', 'Normandy', 'Norine', 'Norelle', 'Nolberto', 'Noha', 'Noga', 'Nitza', 'Nishan', 'Nimisha', 'Nikkol', 'Nikesh', 'Nikela', 'Nigeria', 'Nidal', 'Nicle', 'Nickol', 'Nickoles', 'Nickelous', 'Nickalos', 'Nicholad', 'Nichoal', 'Nichlous', 'Nichael', 'Nial', 'Nhut', 'Nguyet', 'Ngocanh', 'Neysha', 'Newman', 'Nessie', 'Nesa', 'Neng', 'Nelvin', 'Nelle', 'Nella', 'Nelissa', 'Nekole', 'Neidra', 'Negin', 'Neghan', 'Nefi', 'Neesa', 'Neeraj', 'Neenah', 'Neelie', 'Neeley', 'Neelam', 'Ncole', 'Nazish', 'Nazir', 'Nazario', 'Nayra', 'Nausheen', 'Natricia', 'Natishia', 'Natilie', 'Natilee', 'Naticia', 'Nathifa', 'Natheniel', 'Nathanal', 'Nathaiel', 'Natessa', 'Nateasha', 'Natasa', 'Natane', 'Natalye', 'Natally', 'Nataline', 'Nastacia', 'Nasiya', 'Nasia', 'Naria', 'Narah', 'Nanisha', 'Nani', 'Nandita', 'Namrata', 'Namiko', 'Nalee', 'Nakyia', 'Nakkia', 'Nakiah', 'Nakeita', 'Nakeesha', 'Nakeena', 'Nakecia', 'Najee', 'Naiya', 'Nairy', 'Nainoa', 'Nail', 'Nahla', 'Nael', 'Nachman', 'Naa', 'Mysha', 'Myrlande', 'Myosha', 'Myndi', 'Mykah', 'Myhanh', 'Myeasha', 'Mycheal', 'Mycal', 'Muneerah', 'Muhamed', 'Mozell', 'Morgin', 'Morena', 'Moreen', 'Monya', 'Montre', 'Montrelle', 'Montral', 'Montey', 'Montee', 'Montario', 'Montague', 'Monquie', 'Monick', 'Moneisha', 'Moneca', 'Momoko', 'Mollye', 'Moiz', 'Mizraim', 'Miyoshi', 'Missi', 'Miroslava', 'Mirissa', 'Minique', 'Ming', 'Millisa', 'Milburn', 'Milam', 'Mikol', 'Mikita', 'Mikio', 'Mikenna', 'Mikella', 'Mikeala', 'Mikea', 'Mija', 'Mieko', 'Mickle', 'Mickayla', 'Mickaela', 'Michail', 'Michaelpaul', 'Michaeal', 'Miasia', 'Meshia', 'Meshach', 'Merton', 'Merridith', 'Merrell', 'Merl', 'Merilyn', 'Merida', 'Meredyth', 'Melysa', 'Melquiades', 'Melonee', 'Mellody', 'Melisssa', 'Melchizedek', 'Melannie', 'Melandie', 'Mekos', 'Meiling', 'Mehwish', 'Mehran', 'Mehan', 'Megyn', 'Meghean', 'Me', 'Mecos', 'Mecaela', 'Meah', 'Mea', 'Mckell', 'Mcihael', 'Maylynn', 'Mayling', 'Mayla', 'Maybelline', 'Maybelle', 'Maxton', 'Maxime', 'Maxamillion', 'Maurizio', 'Maurisha', 'Mattheu', 'Matthan', 'Matricia', 'Matrice', 'Mat', 'Mathilde', 'Mathilda', 'Mathan', 'Mathaniel', 'Massimo', 'Mashanda', 'Maryland', 'Marykathleen', 'Marven', 'Martrel', 'Marten', 'Martellis', 'Marsell', 'Marquite', 'Marquin', 'Marquie', 'Marqueshia', 'Marquella', 'Marquay', 'Marquasha', 'Marquarius', 'Marquail', 'Marnell', 'Marnae', 'Marlys', 'Marlynn', 'Marlos', 'Marleina', 'Marle', 'Marlanda', 'Markise', 'Markina', 'Markice', 'Markas', 'Marjon', 'Marites', 'Marisia', 'Marisel', 'Marija', 'Marieke', 'Marieann', 'Maribell', 'Mariama', 'Margulia', 'Margues', 'Margarett', 'Margaretta', 'Margarete', 'Margaretann', 'Maretta', 'Marenda', 'Mare', 'Mareesa', 'Mareena', 'Maree', 'Mardi', 'Marcio', 'Marchella', 'Marcelus', 'Marcedes', 'Marbin', 'Maram', 'Manuella', 'Manoah', 'Manika', 'Mandel', 'Mallissa', 'Mallerie', 'Malita', 'Malessa', 'Maleaha', 'Malari', 'Malak', 'Malaka', 'Makinzie', 'Makida', 'Makaela', 'Maiko', 'Maika', 'Maichael', 'Mahyar', 'Mahogony', 'Mahesh', 'Magdiel', 'Magdeline', 'Magdalyn', 'Madolyn', 'Madiha', 'Madelynn', 'Macus', 'Maciel', 'Machell', 'Macgregor', 'Mace', 'Maari', 'Lysander', 'Lynzy', 'Lynze', 'Lynita', 'Lynessa', 'Lyndy', 'Lyndse', 'Lyndale', 'Lynard', 'Luqman', 'Luismiguel', 'Luiscarlos', 'Luisanna', 'Lugenia', 'Lu', 'Ludwig', 'Lucresha', 'Lucette', 'Ltoya', 'Loyda', 'Lovelyn', 'Lorrena', 'Loring', 'Lorimar', 'Lorilei', 'Loriel', 'Loreto', 'Lorenna', 'Lorenia', 'Loreana', 'Loranzo', 'Loralie', 'Loralei', 'Lopaka', 'Loma', 'Lofton', 'Lizza', 'Lizann', 'Lititia', 'Litisha', 'Lisl', 'Lional', 'Linsie', 'Linford', 'Lindzy', 'Lindse', 'Lilyana', 'Lilton', 'Lilliane', 'Lillia', 'Liliano', 'Liliane', 'Li', 'Lierin', 'Liela', 'Lichelle', 'Librada', 'Lezli', 'Leya', 'Levita', 'Levina', 'Levester', 'Letonya', 'Letina', 'Letica', 'Letetia', 'Lesslie', 'Lesleyann', 'Leshea', 'Leonte', 'Leonda', 'Leonarda', 'Lenton', 'Lenn', 'Lenia', 'Lenell', 'Leneisha', 'Lenamarie', 'Lekeya', 'Leinani', 'Leiha', 'Leha', 'Legrande', 'Leeandrea', 'Leeander', 'Leeana', 'Lecresha', 'Lecole', 'Leasha', 'Leanthony', 'Leanora', 'Leamon', 'Leala', 'Leahanna', 'Lazer', 'Lazaros', 'Laysa', 'Lawayne', 'Lavone', 'Laveta', 'Lavel', 'Lavanda', 'Lavale', 'Laurine', 'Laurien', 'Laurieann', 'Laurette', 'Laurenmarie', 'Laurencio', 'Laurelin', 'Laudan', 'Lauar', 'Latysha', 'Latria', 'Latravia', 'Latoyna', 'Latoy', 'Latoyer', 'Latorrie', 'Latorra', 'Latiya', 'Lativia', 'Latham', 'Latesia', 'Latese', 'Lateria', 'Lasundra', 'Lastarr', 'Lasonia', 'Lashunna', 'Lashone', 'Lashona', 'Lashawnna', 'Lashann', 'Lasasha', 'Lasalle', 'Larysa', 'Larsen', 'Larren', 'Laroya', 'Larie', 'Laretha', 'Lareesa', 'Larah', 'Laquite', 'Laquista', 'Laquette', 'Laqueshia', 'Laquenta', 'Laquata', 'Laquasia', 'Lapria', 'Laporchia', 'Laporche', 'Laparis', 'Lannis', 'Laniqua', 'Laneesha', 'Landan', 'Lamonda', 'Lamekia', 'Lamberto', 'Lamara', 'Lakitha', 'Lakeria', 'Lakaisha', 'Lajoy', 'Lailani', 'Laguita', 'Laguan', 'Laguana', 'Ladreka', 'Laddie', 'Ladarryl', 'Ladanna', 'Ladaisha', 'Lacoya', 'Lacorey', 'Lacia', 'Lachrista', 'Lachasity', 'Kyrie', 'Kyriakos', 'Kyonna', 'Kyon', 'Kyona', 'Kymber', 'Kylon', 'Kyeshia', 'Kyan', 'Kvin', 'Kurstin', 'Kumiko', 'Kula', 'Krystil', 'Kryste', 'Krysteen', 'Krystalmarie', 'Kristjan', 'Kristinia', 'Kristinejoy', 'Kristiane', 'Krish', 'Krisanne', 'Kregg', 'Kramer', 'Kota', 'Kortny', 'Koron', 'Ko', 'Kojo', 'Kjersti', 'Kiyonna', 'Kiyoko', 'Kiwanna', 'Kirstine', 'Kiplin', 'Kiosha', 'Kiondra', 'Kinzi', 'Kinzie', 'Kindy', 'Kindle', 'Kindell', 'Kimyata', 'Kimya', 'Kimbrly', 'Kimberlly', 'Ki', 'Kijuan', 'Kiirsten', 'Kierstan', 'Kieonna', 'Kiele', 'Kiante', 'Kiann', 'Kiala', 'Khou', 'Khiana', 'Khia', 'Khayyam', 'Khan', 'Kha', 'Khalila', 'Khalfani', 'Khaleelah', 'Khaleah', 'Keywanda', 'Keyundra', 'Keystal', 'Keyra', 'Keyondra', 'Keyo', 'Keylee', 'Keyetta', 'Keyauna', 'Kevi', 'Keslie', 'Kesa', 'Kerryn', 'Kerek', 'Keo', 'Keoki', 'Keoka', 'Kenyarda', 'Kenroy', 'Kennia', 'Kennette', 'Kennen', 'Kenndra', 'Kenja', 'Kenika', 'Kendricks', 'Kendl', 'Kendelle', 'Kemuel', 'Kemeshia', 'Kema', 'Kelvis', 'Kelsha', 'Kellyjo', 'Kellsey', 'Kellon', 'Kellina', 'Kellijo', 'Kellene', 'Kelita', 'Kelina', 'Kelee', 'Keithon', 'Keiry', 'Keiandra', 'Kees', 'Kee', 'Keath', 'Keandrea', 'Kealani', 'Kayti', 'Kayron', 'Kaylynne', 'Kaylor', 'Kayliegh', 'Kaylena', 'Kayela', 'Kavan', 'Katri', 'Katricia', 'Katonya', 'Katon', 'Katira', 'Katielynn', 'Katiann', 'Katianne', 'Kateena', 'Katana', 'Kasy', 'Kassandre', 'Kashonda', 'Kashaun', 'Kartina', 'Karter', 'Karrisa', 'Karrina', 'Karna', 'Karmesha', 'Karlita', 'Karletta', 'Karlesha', 'Karle', 'Karitza', 'Karinna', 'Karenda', 'Karenann', 'Karaline', 'Kanitra', 'Kanitha', 'Kang', 'Kanethia', 'Kandee', 'Kandance', 'Kamryn', 'Kam', 'Kamini', 'Kametria', 'Kameko', 'Kalysta', 'Kalle', 'Kallan', 'Kalisa', 'Kalim', 'Kalil', 'Kalesha', 'Kalenna', 'Kaleem', 'Kalana', 'Kaitland', 'Kaine', 'Kailen', 'Kailene', 'Kaile', 'Kahley', 'Kahealani', 'Kaetlyn', 'Kaeleigh', 'Kaelah', 'Kadijah', 'Kadeidra', 'Kachina', 'Jvon', 'Juwanda', 'Juvencio', 'Justion', 'Juri', 'Jurel', 'Junko', 'Junious', 'Junho', 'Jumana', 'Julita', 'Juline', 'Julina', 'Juleah', 'Jud', 'Jubilee', 'Juante', 'Juanesha', 'Jssica', 'Jsoeph', 'Joyanne', 'Jowan', 'Jovanne', 'Jostin', 'Josten', 'Josjeph', 'Josianne', 'Joshuia', 'Joshuamichael', 'Joshoa', 'Joshalyn', 'Josel', 'Josefine', 'Josclyn', 'Joron', 'Jordache', 'Joram', 'Jontay', 'Jonnell', 'Jomara', 'Jolly', 'Jolleen', 'Jolita', 'Joletta', 'Joleta', 'Joleigh', 'Jolan', 'Johnphillip', 'Johnnylee', 'Johnjoseph', 'Johnika', 'Johniece', 'Johnice', 'Johney', 'Johnatan', 'Johnanthan', 'Johnadam', 'Joenathan', 'Joelouis', 'Joeline', 'Jodelle', 'Jodan', 'Jocelyne', 'Jobie', 'Joathan', 'Joangela', 'Joal', 'Jl', 'Jiovanni', 'Jimy', 'Jillienne', 'Jillien', 'Jillia', 'Jillan', 'Jillana', 'Jia', 'Jhoanna', 'Jhamal', 'Jesyca', 'Jessye', 'Jesselee', 'Jesie', 'Jesicca', 'Jersey', 'Jerrud', 'Jerrin', 'Jerria', 'Jerramie', 'Jeromiah', 'Jermond', 'Jermeka', 'Jermario', 'Jeris', 'Jerimey', 'Jerianne', 'Jeret', 'Jeresa', 'Jeren', 'Jeree', 'Jeraldine', 'Jerae', 'Jeno', 'Jennylyn', 'Jennis', 'Jenniferlee', 'Jennice', 'Jenisha', 'Jenetta', 'Jenese', 'Jenesa', 'Jenene', 'Jemimah', 'Jemell', 'Jema', 'Jelisa', 'Jeffey', 'Jeannete', 'Jeannea', 'Jeaninne', 'Jeani', 'Jeanann', 'Jazzmen', 'Jazzman', 'Jazmon', 'Jazman', 'Jazmaine', 'Jayquan', 'Jaymeson', 'Jawara', 'Jawanda', 'Javonte', 'Javetta', 'Javaughn', 'Javanna', 'Jatin', 'Jatavia', 'Jatasha', 'Jatara', 'Jasleen', 'Jasine', 'Jashira', 'Jashan', 'Jasan', 'Jaronda', 'Jarome', 'Jarmarcus', 'Jarmaine', 'Jarit', 'Jarette', 'Jaree', 'Jardin', 'Jaramie', 'Jaquline', 'Jaquila', 'Jaquette', 'Jaquelynn', 'Jaquay', 'Janssen', 'Janos', 'Jannice', 'Janne', 'Janiqua', 'Janesse', 'Janesa', 'Janeika', 'Janara', 'Jamonica', 'Jamone', 'Jammar', 'Jamis', 'Jamise', 'Jamisa', 'Jamira', 'Jamez', 'Jamesrobert', 'Jamesedward', 'Jamere', 'Jamena', 'Jamelyn', 'Jamei', 'Jameeka', 'Jamaur', 'Jamas', 'Jamarrio', 'Jamarion', 'Jaman', 'Jalon', 'Jalonda', 'Jalissa', 'Jalayne', 'Jakeline', 'Jaja', 'Jaisen', 'Jaisa', 'Jaimey', 'Jaima', 'Jahn', 'Jahmil', 'Jahmila', 'Jahida', 'Jaemi', 'Jacqulyne', 'Jacquia', 'Jacqueleen', 'Jacquana', 'Jacqualin', 'Jacqeline', 'Jacon', 'Jacobus', 'Jackielyn', 'Jabir', 'Jabe', 'Jabarri', 'Izetta', 'Izabel', 'Ivin', 'Ivie', 'Iveth', 'Iveliz', 'Ivane', 'Ita', 'Isrrael', 'Isra', 'Isolina', 'Ismeal', 'Isidra', 'Ishia', 'Ishaq', 'Ishah', 'Iosif', 'Ineisha', 'Indria', 'Inda', 'Imberly', 'Ilka', 'Ilianna', 'Ileah', 'Ikisha', 'Ikia', 'Ikeya', 'Ikeia', 'Ieesha', 'Idelfonso', 'Icole', 'Hyman', 'Hykeem', 'Hydi', 'Husayn', 'Husam', 'Huriel', 'Hugues', 'Hughes', 'Hovsep', 'Houa', 'Hortensia', 'Honorio', 'Hollylynn', 'Hollyanne', 'Hogan', 'Hoan', 'Hitesh', 'Hiroko', 'Hiran', 'Hilbert', 'Hilaree', 'Hetal', 'Her', 'Herica', 'Henson', 'Heng', 'Hendy', 'Hema', 'Helina', 'Heathr', 'Hashem', 'Harlon', 'Harlen', 'Harinder', 'Haneef', 'Halsey', 'Halleh', 'Hallee', 'Halana', 'Hakiem', 'Hakan', 'Haim', 'Hafeezah', 'Hadiyah', 'Gyna', 'Gwynn', 'Gwendolyne', 'Gustaf', 'Gurpreet', 'Gullermo', 'Guiseppe', 'Guerline', 'Grizel', 'Grandon', 'Gorje', 'Golnaz', 'Godofredo', 'Glorya', 'Glennon', 'Glendy', 'Gladimir', 'Gita', 'Gisella', 'Ginnette', 'Gini', 'Gillis', 'Gilles', 'Giavanna', 'Gianpaolo', 'Geron', 'Georgine', 'Georgeanna', 'Georganne', 'Georganna', 'Geoggrey', 'Genni', 'Genita', 'Genisha', 'Geniffer', 'Geneve', 'Genesia', 'Geffery', 'Geanie', 'Gaylen', 'Gayland', 'Gautam', 'Garold', 'Garnell', 'Garcelle', 'Garbiel', 'Gamalier', 'Galina', 'Gable', 'Gabirel', 'Fuller', 'Fuad', 'Frimet', 'Fredo', 'Fredis', 'Fredick', 'Fraser', 'Frankey', 'Franci', 'Francico', 'Franchot', 'Francene', 'Francelia', 'Fortune', 'Folasade', 'Flossie', 'Flicia', 'Flecia', 'Fitzroy', 'Fionnuala', 'Fionna', 'Filisha', 'Filberto', 'Ferman', 'Fenton', 'Femi', 'Feliz', 'Feliza', 'Felesha', 'Felcia', 'Feigy', 'Fedrick', 'Fatisha', 'Fatemeh', 'Farzana', 'Farryn', 'Farron', 'Farhad', 'Fallynn', 'Fallen', 'Faline', 'Falena', 'Falana', 'Faiga', 'Fahd', 'Fady', 'Fabricio', 'Exavier', 'Eward', 'Ewa', 'Evyan', 'Evett', 'Evely', 'Evelena', 'Evalina', 'Eulanda', 'Esthela', 'Estera', 'Estefani', 'Estefana', 'Esme', 'Esmael', 'Esiquio', 'Esi', 'Eryk', 'Erum', 'Errika', 'Ernesha', 'Erminia', 'Erlin', 'Erkan', 'Eriverto', 'Erineo', 'Ericberto', 'Ereka', 'Equan', 'Eoin', 'Enriqueta', 'Enrica', 'Enna', 'Enio', 'Endre', 'Enas', 'Emmalynn', 'Emilyrose', 'Emilyanne', 'Emilly', 'Emillie', 'Emilene', 'Emelina', 'Emad', 'Elysabeth', 'Eluterio', 'Elpidio', 'Elonzo', 'Elona', 'Elodia', 'Ellise', 'Ellana', 'Eliz', 'Elizet', 'Elizabath', 'Elis', 'Elisebeth', 'Eliscia', 'Elijio', 'Elihu', 'Elese', 'Elenita', 'Elektra', 'Eleftheria', 'Eleena', 'Eleanora', 'Elchonon', 'Ekaterina', 'Ej', 'Eizabeth', 'Effrey', 'Edythe', 'Edy', 'Edwyn', 'Edwrd', 'Edwar', 'Edrian', 'Edel', 'Edd', 'Echoe', 'Ebany', 'Earnie', 'Dystany', 'Dyshaun', 'Dynisha', 'Dyesha', 'Dyanne', 'Dyamond', 'Dwana', 'Dustun', 'Duron', 'Dulse', 'Dulcie', 'Duante', 'Drey', 'Dreux', 'Draper', 'Doyal', 'Dorrie', 'Dorrian', 'Dorota', 'Dorissa', 'Doray', 'Donvan', 'Dontee', 'Dontavis', 'Donovin', 'Donnis', 'Donnavan', 'Donicia', 'Dondrea', 'Dondra', 'Domonque', 'Dommonique', 'Domminic', 'Dominquie', 'Dominek', 'Dominee', 'Domenik', 'Dodie', 'Dnaielle', 'Djuana', 'Divina', 'Distin', 'Diseree', 'Dipesh', 'Dionisios', 'Dinita', 'Dinero', 'Dilcia', 'Dilan', 'Dijuan', 'Dietra', 'Didi', 'Diaz', 'Diamon', 'Diahann', 'Dhyana', 'Dhara', 'Dezman', 'Dezaree', 'Dewaun', 'Dewana', 'Devoris', 'Devonda', 'Devika', 'Develle', 'Devarus', 'Desmund', 'Desmone', 'Desirai', 'Deshundra', 'Deshunda', 'Deshannon', 'Deshan', 'Derian', 'Derak', 'Dequarius', 'Dequana', 'Deontray', 'Denson', 'Densie', 'Denon', 'Deno', 'Denica', 'Deneice', 'Denean', 'Demorrio', 'Demetrias', 'Demetreus', 'Demerius', 'Demerick', 'Demecia', 'Demeatrice', 'Demarr', 'Demarrio', 'Demarques', 'Demareo', 'Delphia', 'Deloria', 'Delontae', 'Deljuan', 'Delise', 'Delight', 'Delfin', 'Delawrence', 'Delania', 'Delance', 'Dela', 'Dejuane', 'Deisha', 'Deidrea', 'Deeandra', 'Dede', 'Deaven', 'Dearon', 'Deara', 'Deanza', 'Deandrew', 'Deadrick', 'Daytron', 'Dayra', 'Dayn', 'Daymon', 'Daylin', 'Dawyne', 'Dawnyel', 'Dawnell', 'Dawanda', 'Davonte', 'Davona', 'Davit', 'Davier', 'Davidlee', 'Davetta', 'Daved', 'Davalyn', 'Dasmond', 'Dashonda', 'Dashell', 'Dashelle', 'Darwyn', 'Darus', 'Dartanian', 'Dartagnan', 'Darrio', 'Darril', 'Darly', 'Darl', 'Darenda', 'Darean', 'Darchelle', 'Darbie', 'Danyl', 'Danyella', 'Danuel', 'Dantavius', 'Danniella', 'Dannica', 'Dannel', 'Dannah', 'Danina', 'Danil', 'Danice', 'Danesa', 'Danen', 'Danecia', 'Dandrell', 'Danaya', 'Damont', 'Damonica', 'Damico', 'Dametria', 'Dalya', 'Dallon', 'Dallis', 'Dalin', 'Dalina', 'Dalesia', 'Daleena', 'Dala', 'Dakesha', 'Daja', 'Daisi', 'Daiana', 'Dagmar', 'Dafina', 'Daemon', 'Daarina', 'Cythina', 'Cynthis', 'Cynthiaann', 'Cynethia', 'Cyler', 'Cutler', 'Cutberto', 'Currie', 'Curits', 'Crystella', 'Crystalrose', 'Crystalle', 'Crystalina', 'Crysal', 'Cristinia', 'Crhistopher', 'Crescencio', 'Craven', 'Cranston', 'Craige', 'Coutney', 'Courtnei', 'Courteny', 'Courey', 'Costas', 'Cosima', 'Cortlandt', 'Corrissa', 'Correna', 'Corney', 'Corneisha', 'Corneilius', 'Corita', 'Corion', 'Corianna', 'Cordney', 'Corday', 'Coralyn', 'Consuella', 'Consepcion', 'Conni', 'Connan', 'Conard', 'Colwyn', 'Colson', 'Colm', 'Coletta', 'Colena', 'Colan', 'Coda', 'Cobin', 'Cloe', 'Clevon', 'Cleofas', 'Clent', 'Clemon', 'Clemmie', 'Clementine', 'Clayborne', 'Claudy', 'Claud', 'Cindra', 'Cilicia', 'Chyvonne', 'Chyla', 'Chuong', 'Chuckie', 'Chritina', 'Christopherlee', 'Christinna', 'Christey', 'Christalyn', 'Chrisotpher', 'Chrislyn', 'Chrisina', 'Chrishanna', 'Chisum', 'Chisty', 'Chino', 'Chimera', 'Chiketa', 'Chikara', 'Chiante', 'Chez', 'Cheslie', 'Cherylee', 'Cherylann', 'Cherylanne', 'Chery', 'Cherrise', 'Cherree', 'Chermaine', 'Cherae', 'Chennell', 'Chenin', 'Chenel', 'Chemeka', 'Chella', 'Cheila', 'Chealsey', 'Chayna', 'Chatoya', 'Chatherine', 'Chatara', 'Chasidi', 'Charta', 'Charron', 'Charnise', 'Charnay', 'Charmin', 'Charmel', 'Charleton', 'Charlet', 'Charlese', 'Charle', 'Charlana', 'Charisha', 'Charece', 'Chardonnay', 'Chardee', 'Chantrice', 'Chantile', 'Chantha', 'Chanique', 'Chanielle', 'Chanequa', 'Chaneka', 'Chandria', 'Chancelor', 'Chamroeun', 'Chalsea', 'Chalon', 'Chalmers', 'Chalea', 'Chae', 'Chadae', 'Chablis', 'Cerrissa', 'Cerita', 'Ceri', 'Cephas', 'Cena', 'Celines', 'Celestia', 'Celes', 'Ceasare', 'Cayman', 'Cayley', 'Cayle', 'Caylan', 'Caycie', 'Catrell', 'Catoya', 'Catiria', 'Cathlena', 'Cathi', 'Catheryne', 'Cathern', 'Catalino', 'Cassee', 'Caspar', 'Cas', 'Carrianne', 'Carrera', 'Carrell', 'Carolos', 'Carolan', 'Carola', 'Carmisha', 'Carmencita', 'Carmalita', 'Carlyne', 'Carlson', 'Carlisle', 'Carlea', 'Carissia', 'Cariann', 'Caree', 'Caralynn', 'Can', 'Candyse', 'Candrea', 'Candias', 'Candia', 'Camy', 'Camryn', 'Cammeron', 'Camia', 'Camacho', 'Calum', 'Calogero', 'Callum', 'Calle', 'Callahan', 'Calena', 'Caleen', 'Calab', 'Caitland', 'Cailen', 'Caela', 'Cacia', 'Bushra', 'Bunny', 'Bulmaro', 'Bubba', 'Bryttani', 'Brytney', 'Bryden', 'Bryceson', 'Bruna', 'Brookes', 'Brookelyn', 'Bronston', 'Brodi', 'Brodey', 'Broadus', 'Brndon', 'Britteney', 'Britnei', 'British', 'Briston', 'Briona', 'Brin', 'Briget', 'Bri', 'Brick', 'Briar', 'Briannon', 'Briam', 'Bresha', 'Brentyn', 'Brenin', 'Brenee', 'Brendalis', 'Brenae', 'Breianna', 'Bre', 'Breezie', 'Breeze', 'Breean', 'Breda', 'Breane', 'Brandylee', 'Brandun', 'Brandonlee', 'Brandilynn', 'Brandenn', 'Brandelyn', 'Brandeis', 'Brandalynn', 'Branch', 'Braiden', 'Brack', 'Bowman', 'Borden', 'Bond', 'Bolivar', 'Bobbye', 'Bobbiesue', 'Bliss', 'Blase', 'Blakeley', 'Biridiana', 'Bionca', 'Billye', 'Bijal', 'Betti', 'Betsi', 'Bethlehem', 'Berton', 'Bernetta', 'Beret', 'Bentzion', 'Bently', 'Benjmain', 'Benji', 'Benjain', 'Benajamin', 'Belkys', 'Belicia', 'Bedford', 'Beatrix', 'Baylor', 'Baudelia', 'Bassem', 'Basma', 'Basilia', 'Barri', 'Barett', 'Barbi', 'Barbarita', 'Balinda', 'Azizah', 'Ayumi', 'Ayleen', 'Ayinde', 'Aydee', 'Aviel', 'Avian', 'Averie', 'Avelina', 'Aunna', 'Audrianna', 'Audia', 'Audel', 'Aubrei', 'Aubrea', 'Atreyu', 'Atlas', 'Atlantis', 'Atisha', 'Atie', 'Athenia', 'Atheena', 'Atanacio', 'Asti', 'Asleigh', 'Ashlley', 'Ashlely', 'Ashland', 'Ashea', 'Ashaunti', 'Aser', 'Asael', 'Arwyn', 'Arvis', 'Arvell', 'Aruna', 'Artrice', 'Artemus', 'Arrow', 'Arran', 'Arpan', 'Arno', 'Arnetra', 'Arlon', 'Arlina', 'Arleigh', 'Aristotle', 'Aristotelis', 'Arifa', 'Arieal', 'Argiro', 'Arek', 'Ared', 'Arch', 'Arabia', 'Aquita', 'Aquino', 'Aquil', 'Apryll', 'Anupama', 'Antwyne', 'Antwion', 'Antrone', 'Antown', 'Antowan', 'Antoria', 'Antonea', 'Antero', 'Anrew', 'Anorea', 'Annya', 'Anniemarie', 'Annett', 'Annell', 'Annelisa', 'Anneli', 'Annelies', 'Anndria', 'Annarose', 'Annamary', 'Annalynn', 'Annalyn', 'Annalissa', 'Annaliisa', 'Anjani', 'Anitria', 'Anis', 'Anikka', 'Aniesha', 'Aniela', 'Angelos', 'Angell', 'Angelino', 'Angeligue', 'Angelamarie', 'Angelamaria', 'Angalena', 'Anetta', 'Aneta', 'Anedra', 'Andru', 'Andris', 'Andrewjames', 'Andren', 'Andray', 'Andice', 'Ander', 'Anda', 'Ancil', 'Anber', 'Anaya', 'Anastazia', 'Anastassia', 'Anan', 'Analuisa', 'Analaura', 'Anahita', 'Amjad', 'Aminda', 'Amika', 'Ameshia', 'Amera', 'Ameisha', 'Ambriel', 'Ambr', 'Ambreia', 'Ambor', 'Amatullah', 'Amandah', 'Amalie', 'Alyss', 'Alycen', 'Alxis', 'Alvita', 'Alven', 'Alsion', 'Alsha', 'Almon', 'Almetra', 'Almee', 'Almando', 'Allex', 'Allesandra', 'Allanna', 'Allah', 'Alka', 'Alixandria', 'Alister', 'Alissia', 'Alisah', 'Alin', 'Aliki', 'Alie', 'Aliecia', 'Alfredia', 'Alfonza', 'Alfonse', 'Alez', 'Aleyda', 'Alexius', 'Aletheia', 'Alesander', 'Aleisa', 'Alegra', 'Aldrick', 'Alder', 'Akhil', 'Akeim', 'Akeila', 'Akbar', 'Ajeenah', 'Ajani', 'Aiysha', 'Aine', 'Aina', 'Aiman', 'Ailyn', 'Aidee', 'Aicia', 'Ahslee', 'Ahsha', 'Agata', 'Afshin', 'Afnan', 'Afaf', 'Aerica', 'Adwoa', 'Adraine', 'Adon', 'Adonia', 'Adnrea', 'Adley', 'Adine', 'Adian', 'Adem', 'Adelbert', 'Adeel', 'Adama', 'Adal', 'Adaliz', 'Adaira', 'Achilles', 'Abubakar', 'Absalon', 'Abie', 'Abdullatif', 'Abdulla', 'Abbye', 'Abbagail', 'Abayomi', 'Aarthi', 'Aarik', 'Aamil', 'Aamanda']
