# Supplementary material
Source: ML conference proceedings conference paper supplement (https://proceedings.neurips.cc/paper_files/paper/2022/hash/331c41353b053683e17f7c88a797701d-Abstract.html)
Supplement: Supplementary file 1 [file 331c41353b053683e17f7c88a797701d-Supplemental-Conference.zip › supp/code_release/mazes/deep-thinking-main/deepthinking/utils/__init__.py]

from .tools import load_model_from_checkpoint, get_dataloaders, get_optimizer, generate_run_id, now
from . import logging_utils


__all__ = ["load_model_from_checkpoint",
           "generate_run_id",
           "get_dataloaders",
           "get_optimizer",
           "now",
           "logging_utils"]
