# Supplementary material
Source: ML conference proceedings conference paper supplement (https://proceedings.neurips.cc/paper_files/paper/2022/hash/331c41353b053683e17f7c88a797701d-Abstract.html)
Supplement: Supplementary file 1 [file 331c41353b053683e17f7c88a797701d-Supplemental-Conference.zip › supp/code_release/mazes/deep-thinking-main/deepthinking/utils/logging_utils.py]

""" logging_utils.py
    Utility functions for logging experiments to CometML and TensorBoard
    Borrowed from code for DeepThinking project
"""
import os

def get_dirs_for_saving(args):

    # generate string for saving, to be used below when saving checkpoints and stats
    base_dir = f"{args.model}_{args.optimizer}" \
               f"_train_mode={args.train_mode}" \
               f"_width={args.width}" \
               f"_max_iters={args.max_iters}" \
               f"_alpha={args.alpha}" \
               f"_lr={args.lr}" \
               f"_batchsize={args.train_batch_size}" \
               f"_epoch={args.epochs - 1}"

    checkpoint = os.path.join("checkpoints", args.output, base_dir)
    result = os.path.join("results", args.output, base_dir, args.run_id)

    for path in [checkpoint, result]:
        if not os.path.isdir(path):
            os.makedirs(path)

    return checkpoint, result


def write_to_tb(stats, stat_names, epoch, writer):
    for name, stat in zip(stat_names, stats):
        stat_name = os.path.join("val", name)
        writer.add_scalar(stat_name, stat, epoch)
