# Supplementary material
Source: ML conference proceedings conference paper supplement (https://proceedings.neurips.cc/paper_files/paper/2022/hash/331c41353b053683e17f7c88a797701d-Abstract.html)
Supplement: Supplementary file 1 [file 331c41353b053683e17f7c88a797701d-Supplemental-Conference.zip › supp/code_release/mazes/deep-thinking-main/deepthinking/utils/tools.py]

import logging
import random
from datetime import datetime

import torch
from icecream import ic
from torch.optim import SGD, Adam, AdamW
from torch.optim.lr_scheduler import MultiStepLR, CosineAnnealingLR

import deepthinking.models as models
from .mazes_data import prepare_maze_loader
from .prefix_sums_data import prepare_prefix_loader
from .chess_data import prepare_chess_loader
from .binary_add_data import prepare_binadd_loader, prepare_binsub_loader
from .binary_prod_data import prepare_binprod_loader, prepare_binprodmod_loader
from .. import adjectives, names

from .warmup import ExponentialWarmup, LinearWarmup

def generate_run_id():
    hashstr = f"{adjectives[random.randint(0, len(adjectives))]}-{names[random.randint(0, len(names))]}"
    return hashstr


def get_dataloaders(problem_args, train_shuffle=True):
    if problem_args.name == "prefix_sums":
        return prepare_prefix_loader(train_batch_size=problem_args.hyp.train_batch_size,
                                     test_batch_size=problem_args.hyp.test_batch_size,
                                     train_data=problem_args.train_data,
                                     test_data=problem_args.test_data)
    elif problem_args.name == "mazes":
        return prepare_maze_loader(train_batch_size=problem_args.hyp.train_batch_size,
                                   test_batch_size=problem_args.hyp.test_batch_size,
                                   train_data=problem_args.train_data,
                                   test_data=problem_args.test_data,
                                   shuffle=train_shuffle)
    elif problem_args.name == "chess":
        return prepare_chess_loader(train_batch_size=problem_args.hyp.train_batch_size,
                                    test_batch_size=problem_args.hyp.test_batch_size,
                                    train_data=problem_args.train_data,
                                    test_data=problem_args.test_data)
    elif problem_args.name == "binary_add":
        return prepare_binadd_loader(train_batch_size=problem_args.hyp.train_batch_size,
                                    test_batch_size=problem_args.hyp.test_batch_size,
                                    train_data=problem_args.train_data,
                                    test_data=problem_args.test_data)
    elif problem_args.name == "binary_sub":
        return prepare_binsub_loader(train_batch_size=problem_args.hyp.train_batch_size,
                                    test_batch_size=problem_args.hyp.test_batch_size,
                                    train_data=problem_args.train_data,
                                    test_data=problem_args.test_data)
    elif problem_args.name == "binary_prod":
        return prepare_binprod_loader(train_batch_size=problem_args.hyp.train_batch_size,
                                    test_batch_size=problem_args.hyp.test_batch_size,
                                    train_data=problem_args.train_data,
                                    test_data=problem_args.test_data)
    elif problem_args.name == "binary_prod_mod":
        return prepare_binprodmod_loader(train_batch_size=problem_args.hyp.train_batch_size,
                                    test_batch_size=problem_args.hyp.test_batch_size,
                                    train_data=problem_args.train_data,
                                    test_data=problem_args.test_data)
    else:
        raise ValueError(f"Invalid problem spec. {problem_args.name}")


def get_model(model, width, max_iters, config, in_channels=3):
    model = model.lower()
    net = getattr(models, model)(width=width, in_channels=in_channels, max_iters=max_iters, config=config)
    return net


def get_optimizer(optim_args, model_args, net, state_dict):
    optimizer_name = optim_args.optimizer.lower()
    epochs = optim_args.epochs
    lr = optim_args.lr
    lr_decay = optim_args.lr_decay
    lr_schedule = optim_args.lr_schedule
    lr_factor = optim_args.lr_factor
    warmup_period = optim_args.warmup_period

    if optim_args.lr_throttle:
        # Reducing the lr here for the recurrent layers helps with stability,
        # To date (July 21, 2021), we may only need this for maze models.
        base_params = [p for n, p in net.named_parameters() if "recur" not in n]
        recur_params = [p for n, p in net.named_parameters() if "recur" in n]
        iters = model_args.max_iters
        all_params = [{"params": base_params}, {"params": recur_params, "lr": lr / iters}]
    else:
        base_params = [p for n, p in net.named_parameters()]
        recur_params = []
        iters = 1
        all_params = [{"params": base_params}]

    if optimizer_name == "sgd":
        optimizer = SGD(all_params, lr=lr, weight_decay=2e-4, momentum=0.9)
    elif optimizer_name == "adam":
        optimizer = Adam(all_params, lr=lr, weight_decay=2e-4)
    elif optimizer_name == "adamw":
        optimizer = AdamW(all_params, lr=lr, weight_decay=2e-4)
    else:
        raise ValueError(f"{ic.format()}: Optimizer choise of {optimizer_name} not yet implmented.")

    if state_dict is not None:
        optimizer.load_state_dict(state_dict)
        warmup_scheduler = ExponentialWarmup(optimizer, warmup_period=0)
    else:
        warmup_scheduler = ExponentialWarmup(optimizer, warmup_period=warmup_period)

    if lr_decay.lower() == "step":
        lr_scheduler = MultiStepLR(optimizer, milestones=lr_schedule,
                                   gamma=lr_factor, last_epoch=-1)
    elif lr_decay.lower() == "cosine":
        lr_scheduler = CosineAnnealingLR(optimizer, epochs, eta_min=0, last_epoch=-1, verbose=False)
    else:
        raise ValueError(f"{ic.format()}: Learning rate decay style {lr_decay} not yet implemented.")

    return optimizer, warmup_scheduler, lr_scheduler


def load_model_from_checkpoint(problem, model_args, device, config):
    model = model_args.model
    model_path = model_args.model_path
    width = model_args.width
    max_iters = model_args.max_iters
    epoch = 0
    optimizer = None

    in_channels = 3
    if problem == "chess":
        in_channels = 12

    net = get_model(model, width, in_channels=in_channels, max_iters=max_iters, config=config)
    net = net.to(device)
    if device == "cuda":
        net = torch.nn.DataParallel(net)
    if model_path is not None:
        logging.info(f"Loading model from checkpoint {model_path}...")
        state_dict = torch.load(model_path, map_location=device)
        net.load_state_dict(state_dict["net"])
        epoch = state_dict["epoch"] + 1
        optimizer = state_dict["optimizer"]

    return net, epoch, optimizer


def now():
    return datetime.now().strftime("%Y%m%d %H:%M:%S")
