# Supplementary material
Source: ML conference proceedings conference paper supplement (https://proceedings.neurips.cc/paper_files/paper/2022/hash/331c41353b053683e17f7c88a797701d-Abstract.html)
Supplement: Supplementary file 1 [file 331c41353b053683e17f7c88a797701d-Supplemental-Conference.zip › supp/code_release/mazes/deep-thinking-main/launch/mazes_experiments.sh]

#### Training Progressive nets and non-weight tied networks

#python train_model.py problem.hyp.alpha=0.00 problem/model=dt_net_2d problem=mazes name=mazes_ablation
#python train_model.py problem.hyp.alpha=0.01 problem/model=dt_net_2d problem=mazes name=mazes_ablation
#python train_model.py problem.hyp.alpha=0.50 problem/model=dt_net_2d problem=mazes name=mazes_ablation
#python train_model.py problem.hyp.alpha=1.00 problem/model=dt_net_2d problem=mazes name=mazes_ablation
#python train_model.py problem.hyp.alpha=0.00 problem/model=dt_net_recall_gn_2d problem=mazes name=mazes_ablation_gn problem.hyp.epochs=200
#python train_model.py problem.hyp.alpha=0.01 problem/model=dt_net_recall_gn_2d problem=mazes name=mazes_ablation_gn problem.hyp.epochs=200
#python train_model.py problem.hyp.alpha=0.50 problem/model=dt_net_recall_gn_2d problem=mazes name=mazes_ablation_ep200 problem.hyp.epochs=200
python train_model.py problem.hyp.alpha=1.00 problem/model=dt_net_recall_2d problem=mazes name=mazes_ablation
#python train_model.py problem.hyp.alpha=0.00 problem.hyp.epochs=200 problem.hyp.lr=0.0001 problem.hyp.lr_schedule=[175] problem/model=ff_net_2d problem=mazes name=mazes_ablation
#python train_model.py problem.hyp.alpha=0.01 problem.hyp.epochs=200 problem.hyp.lr=0.0001 problem.hyp.lr_schedule=[175] problem/model=ff_net_2d problem=mazes name=mazes_ablation
#python train_model.py problem.hyp.alpha=0.50 problem.hyp.epochs=200 problem.hyp.lr=0.0001 problem.hyp.lr_schedule=[175] problem/model=ff_net_2d problem=mazes name=mazes_ablation
#python train_model.py problem.hyp.alpha=0.00 problem.hyp.epochs=200 problem.hyp.lr=0.0001 problem.hyp.lr_schedule=[175] problem/model=ff_net_recall_2d problem=mazes name=mazes_ablation
#python train_model.py problem.hyp.alpha=0.01 problem.hyp.epochs=200 problem.hyp.lr=0.0001 problem.hyp.lr_schedule=[175] problem/model=ff_net_recall_2d problem=mazes name=mazes_ablation
#python train_model.py problem.hyp.alpha=0.50 problem.hyp.epochs=200 problem.hyp.lr=0.0001 problem.hyp.lr_schedule=[175] problem/model=ff_net_recall_2d problem=mazes name=mazes_ablation
