# Supplementary material
Source: ML conference proceedings conference paper supplement (https://proceedings.neurips.cc/paper_files/paper/2022/hash/331c41353b053683e17f7c88a797701d-Abstract.html)
Supplement: Supplementary file 1 [file 331c41353b053683e17f7c88a797701d-Supplemental-Conference.zip › supp/code_release/mazes/deep-thinking-main/launch/test_deq_v3.sh]

#!/bin/bash
python test_deq.py problem.hyp.train_mode=deq problem.hyp.test_mode=deq problem/model=deq_net_v3 problem=mazes name=results_mazes_deqv3_xproj_ift_wnorm_ep150 problem.deq.norm=none problem.hyp.epochs=200 problem.train.pretrain_steps=200 problem.deq.wnorm=False problem.deq.num_layers=32 problem.model.model_path=/outputs_deq_mazes/mazes_deqv3_xproj_broyden_pt_ep100_ift_ep150/ problem.test_data=13 quick_test=True model_name=model_best_123_100.0.pth problem.hyp.test_batch_size=10 problem.hyp.train_batch_size=100 problem.deq.f_solver=broyden problem.deq.b_solver=broyden problem.deq.f_thres=60 problem.deq.fp_init=xproj
