# Supplementary material
Source: ML conference proceedings conference paper supplement (https://proceedings.neurips.cc/paper_files/paper/2022/hash/331c41353b053683e17f7c88a797701d-Abstract.html)
Supplement: Supplementary file 1 [file 331c41353b053683e17f7c88a797701d-Supplemental-Conference.zip › supp/code_release/mazes/deep-thinking-main/launch/train_deq_v3.sh]

#!/bin/bash

#### New exp
#python train_deq.py problem.hyp.train_mode=deq problem.hyp.test_mode=deq problem/model=deq_net_v3 problem=mazes name=mazes_deqv3_xproj_ep200_nl15_wt_no_inj problem.deq.fp_init=x_proj problem.hyp.epochs=100 problem.hyp.lr=0.001 problem.train.pretrain_steps=100 problem.deq.loss.jac_loss=False problem.deq.num_layers=15
#python train_deq.py problem.hyp.train_mode=deq problem.hyp.test_mode=deq problem/model=deq_net_v3 problem=mazes name=mazes_deqv3_xproj_ep200_nl15_wt_no_wnorm problem.deq.fp_init=x_proj problem.hyp.epochs=100 problem.hyp.lr=0.001 problem.train.pretrain_steps=100 problem.deq.loss.jac_loss=False problem.deq.num_layers=15 problem.deq.wnorm=False

#python train_deq.py problem.hyp.train_mode=deq problem.hyp.test_mode=deq problem/model=deq_net_v3 problem=mazes name=mazes_deqv3_xproj_ep200_nl30_wt_no_wnorm_no_solver problem.deq.fp_init=x_proj problem.hyp.epochs=200 problem.hyp.lr=0.001 problem.train.pretrain_steps=200 problem.deq.loss.jac_loss=False problem.deq.num_layers=30 problem.deq.wnorm=False

python train_deq.py problem.hyp.train_mode=deq problem.hyp.test_mode=deq problem/model=deq_net_v3 problem=mazes name=mazes_deqv3_xproj_ep200_n15_no_wnorm_wt_broyden problem.deq.fp_init=x_proj problem.hyp.epochs=200 problem.hyp.lr=0.0005 problem.train.pretrain_steps=200 problem.deq.loss.jac_loss=False problem.deq.num_layers=15 problem.deq.wnorm=True problem.deq.f_solver=broyden problem.deq.b_solver=broyden

#python train_deq.py problem.hyp.train_mode=deq problem.hyp.test_mode=deq problem/model=deq_net_v3 problem=mazes name=mazes_deqv3_xproj_ep200_nl5_no_wnorm_broyden problem.deq.fp_init=x_proj problem.hyp.epochs=200 problem.hyp.lr=0.001 problem.train.pretrain_steps=50 problem.deq.loss.jac_loss=False problem.deq.num_layers=30 problem.deq.wnorm=False problem.deq.f_solver=broyden problem.deq.b_solver=broyden

#python train_deq.py problem.hyp.train_mode=deq problem.hyp.test_mode=deq problem/model=deq_net_v3 problem=mazes name=mazes_deqv3_xproj_ep200_nl15_no_wnorm problem.deq.fp_init=x_proj problem.hyp.epochs=200 problem.hyp.lr=0.001 problem.train.pretrain_steps=20 problem.deq.loss.jac_loss=False problem.deq.num_layers=15 problem.deq.wnorm=False

#python train_deq.py problem.hyp.train_mode=deq problem.hyp.test_mode=deq problem/model=deq_net_v3 problem=mazes name=mazes_deqv3_xproj_ep200_nl30_no_wnorm problem.deq.fp_init=x_proj problem.hyp.epochs=200 problem.hyp.lr=0.0005 problem.train.pretrain_steps=50 problem.deq.loss.jac_loss=False problem.deq.num_layers=30 problem.deq.wnorm=False

#python train_deq.py problem.hyp.train_mode=deq problem.hyp.test_mode=deq problem/model=deq_net_v3 problem=mazes name=mazes_deqv3_xproj_ep200_nl30_no_wnorm problem.deq.fp_init=x_proj problem.hyp.epochs=200 problem.hyp.lr=0.001 problem.train.pretrain_steps=20 problem.deq.loss.jac_loss=False problem.deq.num_layers=30 problem.deq.wnorm=False

#python train_deq.py problem.hyp.train_mode=deq problem.hyp.test_mode=deq problem/model=deq_net_v3 problem=mazes name=mazes_deqv3_xproj_ep200_nl30_wnorm problem.deq.fp_init=x_proj problem.hyp.epochs=200 problem.hyp.lr=0.001 problem.train.pretrain_steps=30 problem.deq.loss.jac_loss=False problem.deq.num_layers=30 problem.deq.wnorm=True

#python train_deq.py problem.hyp.train_mode=deq problem.hyp.test_mode=deq problem/model=deq_net_v3 problem=mazes name=mazes_deqv3_xproj_ep200_nl30_no_wnorm_jac_w0.1_f0.5 problem.deq.fp_init=x_proj problem.hyp.epochs=200 problem.hyp.lr=0.001 problem.train.pretrain_steps=30 problem.deq.loss.jac_loss=True problem.deq.num_layers=30 problem.deq.wnorm=False problem.deq.loss.pretrain_jac_loss_weight=0.1 problem.deq.loss.jac_loss_freq=0.5

#python train_deq.py problem.hyp.train_mode=deq problem.hyp.test_mode=deq problem/model=deq_net_v3 problem=mazes name=mazes_deqv3_xproj_ep200_nl30_wnorm_jac_w0.1_f0.5 problem.deq.fp_init=x_proj problem.hyp.epochs=200 problem.hyp.lr=0.001 problem.train.pretrain_steps=30 problem.deq.loss.jac_loss=True problem.deq.num_layers=30 problem.deq.wnorm=True problem.deq.loss.pretrain_jac_loss_weight=0.1 problem.deq.loss.jac_loss_freq=0.5

#python train_deq.py problem.hyp.train_mode=deq problem.hyp.test_mode=deq problem/model=deq_net_v3 problem=mazes name=mazes_deqv3_xproj_ep200_nl30_wnorm_jac_w0.1_f0.5 problem.deq.fp_init=x_proj problem.hyp.epochs=200 problem.hyp.lr=0.001 problem.train.pretrain_steps=30 problem.deq.loss.jac_loss=True problem.deq.num_layers=30 problem.deq.wnorm=True problem.deq.loss.pretrain_jac_loss_weight=0.1 problem.deq.loss.jac_loss_freq=0.5

#python train_deq.py problem.hyp.train_mode=deq problem.hyp.test_mode=deq problem/model=deq_net_v3 problem=mazes name=mazes_deqv3_xproj_ep200_nl30_wnorm_jac_w0.1_f0.25 problem.deq.fp_init=x_proj problem.hyp.epochs=200 problem.hyp.lr=0.001 problem.train.pretrain_steps=50 problem.deq.loss.jac_loss=True problem.deq.num_layers=30 problem.deq.wnorm=True problem.deq.loss.pretrain_jac_loss_weight=0.1 problem.deq.loss.jac_loss_freq=0.25

#python train_deq.py problem.hyp.train_mode=deq problem.hyp.test_mode=deq problem/model=deq_net_v3 problem=mazes name=mazes_deqv3_xproj_ep200_nl30_wnorm_jac_w0.1_f0.05 problem.deq.fp_init=x_proj problem.hyp.epochs=200 problem.hyp.lr=0.001 problem.train.pretrain_steps=50 problem.deq.loss.jac_loss=True problem.deq.num_layers=30 problem.deq.wnorm=True problem.deq.loss.pretrain_jac_loss_weight=0.1 problem.deq.loss.jac_loss_freq=0.05 problem.deq.loss.jac_stop_epoch=100

#python train_deq.py problem.hyp.train_mode=deq problem.hyp.test_mode=deq problem/model=deq_net_v3 problem=mazes name=mazes_deqv3_xproj_ep200_nl30_wnorm_b_jac_w0.1_f0.05 problem.deq.fp_init=x_proj problem.hyp.epochs=200 problem.hyp.lr=0.001 problem.train.pretrain_steps=50 problem.deq.loss.jac_loss=True problem.deq.num_layers=30 problem.deq.wnorm=True problem.deq.loss.pretrain_jac_loss_weight=0.1 problem.deq.loss.jac_loss_freq=0.05 problem.deq.loss.jac_stop_epoch=100  problem.deq.f_solver=broyden problem.deq.b_solver=broyden
