# Supplementary material
Source: ML conference proceedings conference paper supplement (https://proceedings.neurips.cc/paper_files/paper/2022/hash/331c41353b053683e17f7c88a797701d-Abstract.html)
Supplement: Supplementary file 1 [file 331c41353b053683e17f7c88a797701d-Supplemental-Conference.zip › supp/code_release/mazes/deep-thinking-main/requirements.txt]

chess==1.6.1
comet-ml==3.13.2
easy-to-hard-data==1.0.0
einops~=0.3.2
hydra-core=1.1.1
icecream~=2.1.1
matplotlib~=3.5.0
numpy~=1.21.4
omegaconf~=2.1.1
pandas~=1.3.4
Pillow==8.2.0
scipy==1.7.0
seaborn~=0.11.2
svglib==1.1.0
tensorboard==2.2.2
tensorboard-plugin-wit==1.8.0
torch~=1.10.0
torchvision==0.8.2
tqdm~=4.62.3
