# Supplementary material
Source: ML conference proceedings conference paper supplement (https://proceedings.neurips.cc/paper_files/paper/2022/hash/331c41353b053683e17f7c88a797701d-Abstract.html)
Supplement: Supplementary file 1 [file 331c41353b053683e17f7c88a797701d-Supplemental-Conference.zip › supp/code_release/mazes/deep-thinking-main/test_deq.py]

""" test_model.py
    Test models
    Borrowed from code for DeepThinking project
"""

import logging
import os
import sys
from collections import OrderedDict

import json

import hydra
import torch
from omegaconf import DictConfig, OmegaConf

import deepthinking as dt

@hydra.main(config_path="config", config_name="test_model_config")
def main(cfg: DictConfig):
    device = "cuda" if torch.cuda.is_available() else "cpu"
    torch.backends.cudnn.benchmark = True
    if cfg.problem.hyp.save_period is None:
        cfg.problem.hyp.save_period = cfg.problem.hyp.epochs
    log = logging.getLogger()
    log.info("\n_________________________________________________\n")
    log.info("test_model.py main() running.")
    log.info(OmegaConf.to_yaml(cfg))

    training_args = OmegaConf.load(os.path.join(cfg.problem.model.model_path, ".hydra/config.yaml"))
    cfg_keys_to_load = [("hyp", "alpha"),
                        ("hyp", "epochs"),
                        ("hyp", "lr"),
                        ("hyp", "lr_factor"),
                        ("model", "max_iters"),
                        ("model", "model"),
                        ("hyp", "optimizer"),
                        ("hyp", "train_mode"),
                        ("model", "width")]
    for k1, k2 in cfg_keys_to_load:
        cfg["problem"][k1][k2] = training_args["problem"][k1][k2]
    cfg.problem.train_data = cfg.problem.train_data

    log.info(OmegaConf.to_yaml(cfg))

    ####################################################
    #               Dataset and Network and Optimizer
    loaders = dt.utils.get_dataloaders(cfg.problem, train_shuffle=False)

    cfg.problem.model.model_path = os.path.join(cfg.problem.model.model_path, cfg.model_name)
    net, start_epoch, optimizer_state_dict = dt.utils.load_model_from_checkpoint(cfg.problem.name,
                                                                                 cfg.problem.model,
                                                                                 device,
                                                                                 cfg)
    pytorch_total_params = sum(p.numel() for p in net.parameters())
    log.info(f"This {cfg.problem.model.model} has {pytorch_total_params/1e6:0.3f} million parameters.")
    ####################################################

    ####################################################
    #        Test
    log.info("==> Starting testing...")
    if "feedforward" in cfg.problem.model.model or 'ff_net' in cfg.problem.model.model:
        test_iterations = [cfg.problem.model.max_iters]
    else:
        test_iterations = list(range(cfg.problem.model.test_iterations["low"],
                                     cfg.problem.model.test_iterations["high"] + 1))

    if cfg.quick_test:
        test_acc = dt.test(net, [loaders["test"]], cfg.problem.hyp.test_mode, test_iterations, cfg.problem.name, device)
        test_acc = test_acc[0]
        val_acc, train_acc = None, None
    else:
        test_acc, val_acc, train_acc = dt.test(net,
                                               [loaders["test"], loaders["val"], loaders["train"]],
                                               cfg.problem.hyp.test_mode,
                                               test_iterations,
                                               cfg.problem.name, device)

    log.info(f"{dt.utils.now()} Training accuracy: {train_acc}")
    log.info(f"{dt.utils.now()} Val accuracy: {val_acc}")
    log.info(f"{dt.utils.now()} Testing accuracy (hard data): {test_acc}")
    
    model_name_str = f"{cfg.problem.model.model}_width={cfg.problem.model.width}"
    stats = OrderedDict([("epochs", cfg.problem.hyp.epochs),
                         ("lr", cfg.problem.hyp.lr),
                         ("lr_factor", cfg.problem.hyp.lr_factor),
                         ("model", model_name_str),
                         ("model_path", cfg.problem.model.model_path),
                         ("num_params", pytorch_total_params),
                         ("optimizer", cfg.problem.hyp.optimizer),
                         ("val_acc", val_acc),
                         ("run_id", cfg.run_id),
                         ("test_acc", test_acc),
                         ("test_data", cfg.problem.test_data),
                         ("test_iters", test_iterations),
                         ("test_mode", cfg.problem.hyp.test_mode),
                         ("train_data", cfg.problem.train_data),
                         ("train_acc", train_acc),
                         ("train_batch_size", cfg.problem.hyp.train_batch_size),
                         ("train_mode", cfg.problem.hyp.train_mode),
                         ("f_solver", cfg.problem.deq.f_solver),
                         ("b_solver", cfg.problem.deq.b_solver),
                         ("f_thres", cfg.problem.deq.f_thres),
                         ("fp_init", cfg.problem.deq.fp_init),
                         ("norm", cfg.problem.deq.norm),
                         ("groups", cfg.problem.deq.num_groups)
                         ])
    with open(os.path.join("stats.json"), "w") as fp:
        json.dump(stats, fp)
    log.info(stats)
    ####################################################


if __name__ == "__main__":
    run_id = dt.utils.generate_run_id()
    sys.argv.append(f"+run_id={run_id}")
    main()
