# Supplementary material
Source: ML conference proceedings conference paper supplement (https://proceedings.neurips.cc/paper_files/paper/2022/hash/331c41353b053683e17f7c88a797701d-Abstract.html)
Supplement: Supplementary file 1 [file 331c41353b053683e17f7c88a797701d-Supplemental-Conference.zip › supp/code_release/mazes/deep-thinking-main/train_model.py]

import json
import logging
import os
import sys
from collections import OrderedDict

import hydra
import numpy as np
import torch
from icecream import ic
from omegaconf import DictConfig, OmegaConf
from torch.utils.tensorboard import SummaryWriter

import deepthinking as dt
import deepthinking.utils.logging_utils as lg

#    Borrowed from code for DeepThinking project

@hydra.main(config_path="config", config_name="train_model_config")
def main(cfg: DictConfig):
    device = "cuda" if torch.cuda.is_available() else "cpu"
    torch.backends.cudnn.benchmark = True
    log = logging.getLogger()
    log.info("\n_________________________________________________\n")
    log.info("train_model.py main() running.")
    log.info(OmegaConf.to_yaml(cfg))

    cfg.problem.model.test_iterations = list(range(cfg.problem.model.test_iterations["low"],
                                                   cfg.problem.model.test_iterations["high"] + 1))
    assert 0 <= cfg.problem.hyp.alpha <= 1, "Weighting for loss (alpha) not in [0, 1], exiting."
    writer = SummaryWriter(log_dir=f"tensorboard-{cfg.problem.model.model}-{cfg.problem.hyp.alpha}")

    ####################################################
    #               Dataset and Network and Optimizer
    loaders = dt.utils.get_dataloaders(cfg.problem)

    net, start_epoch, optimizer_state_dict = dt.utils.load_model_from_checkpoint(cfg.problem.name,
                                                                                 cfg.problem.model,
                                                                                 device,
                                                                                 cfg)
    pytorch_total_params = sum(p.numel() for p in net.parameters())
    log.info(f"This {cfg.problem.model.model} has {pytorch_total_params/1e6:0.3f} million parameters.")
    log.info(f"Training will start at epoch {start_epoch}.")
    optimizer, warmup_scheduler, lr_scheduler = dt.utils.get_optimizer(cfg.problem.hyp,
                                                                       cfg.problem.model,
                                                                       net,
                                                                       optimizer_state_dict)
    train_setup = dt.TrainingSetup(optimizer=optimizer,
                                   scheduler=lr_scheduler,
                                   warmup=warmup_scheduler,
                                   clip=cfg.problem.hyp.clip,
                                   alpha=cfg.problem.hyp.alpha,
                                   max_iters=cfg.problem.model.max_iters,
                                   problem=cfg.problem.name)
    ####################################################

    ####################################################
    #        Train
    log.info(f"==> Starting training for {max(cfg.problem.hyp.epochs - start_epoch, 0)} epochs...")
    highest_val_acc_so_far = -1
    best_so_far = False
    import pdb; pdb.set_trace()
    for epoch in range(start_epoch, cfg.problem.hyp.epochs):
        loss, acc = dt.train(net, loaders, cfg.problem.hyp.train_mode, train_setup, device)
        val_acc = dt.test(net, [loaders["val"]], cfg.problem.hyp.test_mode, [cfg.problem.model.max_iters],
                          cfg.problem.name, device)[0][cfg.problem.model.max_iters]
        if val_acc > highest_val_acc_so_far:
            best_so_far = True
            highest_val_acc_so_far = val_acc

        log.info(f"Training loss at epoch {epoch}: {loss}")
        log.info(f"Training accuracy at epoch {epoch}: {acc}")
        log.info(f"Val accuracy at epoch {epoch}: {val_acc}")

        # if the loss is nan, then stop the training
        if np.isnan(float(loss)):
            raise ValueError(f"{ic.format()} Loss is nan, exiting...")

        # TensorBoard loss writing
        writer.add_scalar("Loss/loss", loss, epoch)
        writer.add_scalar("Accuracy/acc", acc, epoch)
        writer.add_scalar("Accuracy/val_acc", val_acc, epoch)

        for i in range(len(optimizer.param_groups)):
            writer.add_scalar(f"Learning_rate/group{i}",
                              optimizer.param_groups[i]["lr"],
                              epoch)

        # evaluate the model periodically and at the final epoch
        if (epoch + 1) % cfg.problem.hyp.val_period == 0 or epoch + 1 == cfg.problem.hyp.epochs:
            test_acc, val_acc, train_acc = dt.test(net,
                                                   [loaders["test"],
                                                    loaders["val"],
                                                    loaders["train"]],
                                                   cfg.problem.hyp.test_mode,
                                                   cfg.problem.model.test_iterations,
                                                   cfg.problem.name,
                                                   device)
            log.info(f"Training accuracy: {train_acc}")
            log.info(f"Val accuracy: {val_acc}")
            log.info(f"Test accuracy (hard data): {test_acc}")

            tb_last = cfg.problem.model.test_iterations[-1]
            lg.write_to_tb([train_acc[tb_last], val_acc[tb_last], test_acc[tb_last]],
                           ["train_acc", "val_acc", "test_acc"],
                           epoch,
                           writer)
        # check to see if we should save
        save_now = (epoch + 1) % cfg.problem.hyp.save_period == 0 or \
                   (epoch + 1) == cfg.problem.hyp.epochs or best_so_far
        if save_now:
            state = {"net": net.state_dict(), "epoch": epoch, "optimizer": optimizer.state_dict()}
            out_str = f"model_{'best' if best_so_far else ''}.pth"
            best_so_far = False
            log.info(f"Saving model to: {out_str}")
            torch.save(state, out_str)
    writer.flush()
    writer.close()

    # save some accuracy stats (can be used without testing to discern which models trained)
    stats = OrderedDict([("max_iters", cfg.problem.model.max_iters),
                         ("run_id", cfg.run_id),
                         ("test_acc", test_acc),
                         ("test_data", cfg.problem.test_data),
                         ("test_iters", list(cfg.problem.model.test_iterations)),
                         ("test_mode", cfg.problem.hyp.test_mode),
                         ("train_data", cfg.problem.train_data),
                         ("train_acc", train_acc),
                         ("val_acc", val_acc)])
    with open(os.path.join("stats.json"), "w") as fp:
        json.dump(stats, fp)
    log.info(stats)
    ####################################################


if __name__ == "__main__":
    run_id = dt.utils.generate_run_id()
    sys.argv.append(f"+run_id={run_id}")
    main()
