# Supplementary material
Source: ML conference proceedings conference paper supplement (https://proceedings.neurips.cc/paper_files/paper/2022/hash/331c41353b053683e17f7c88a797701d-Abstract.html)
Supplement: Supplementary file 1 [file 331c41353b053683e17f7c88a797701d-Supplemental-Conference.zip › supp/code_release/prefix_sum/TIL_neurips_release/setup.py]

#!/usr/bin/env python

from setuptools import setup, find_packages
from codecs import open
from os import path
import os

working_dir = path.abspath(path.dirname(__file__))
ROOT = os.path.abspath(os.path.dirname(__file__))

# Read the README.
with open(os.path.join(ROOT, 'README.md'), encoding="utf-8") as f:
    README = f.read()

setup(name='TIL',
      version='0.0.1',
      description='Trajectory Independent Learning',
      long_description=README,
      long_description_content_type='text/markdown',
      packages=find_packages(exclude=['tests/*']),
      setup_requires=["numpy", "torch", "torchvision", "spaghettini"],
      install_requires=["numpy", "scipy", "matplotlib", "test_tube", "tqdm", "munch", "imageio",
                        "pytorch_lightning==1.5.10", "jupyter", "wandb", "sklearn", "termcolor", "torchtext",
                        "transformers", "scikit-image", "albumentations", "Wand", "oyaml", "nose", "easy-to-hard-data",
                        "paramiko"],
      )
