# Supplementary material
Source: ML conference proceedings conference paper supplement (https://proceedings.neurips.cc/paper_files/paper/2022/hash/331c41353b053683e17f7c88a797701d-Abstract.html)
Supplement: Supplementary file 1 [file 331c41353b053683e17f7c88a797701d-Supplemental-Conference.zip › supp/code_release/prefix_sum/TIL_neurips_release/src/__init__.py]

import src.analysis
import src.data
import src.dl
import src.learners
import src.mains
import src.registry
import src.utils
