# Supplementary material
Source: ML conference proceedings conference paper supplement (https://proceedings.neurips.cc/paper_files/paper/2022/hash/331c41353b053683e17f7c88a797701d-Abstract.html)
Supplement: Supplementary file 1 [file 331c41353b053683e17f7c88a797701d-Supplemental-Conference.zip › supp/code_release/prefix_sum/TIL_neurips_release/src/dl/__init__.py]

import src.dl.models
import src.dl.fixed_point_solvers
import src.dl.model_kwargs_getters
import src.dl.losses
import src.dl.optimizers
